# Supplementary material for: Genomic diversity across the Rickettsia and ‘Candidatus Megaira’ genera and proposal of genus status for the Torix group
Source: Nat Commun. 2022 May 12;13:2630. doi: 10.1038/s41467-022-30385-6 (PMC9098888; doi:10.1038/s41467-022-30385-6)
Supplement: Supplementary file 6 — Source Data [file 41467_2022_30385_MOESM6_ESM.xlsx]

## Sheet: READ ME
	Welcome to the source data tables!
	Here you will find all raw data used in figure construction and data analysis
	Red tabs contain: Main figure data
	Yellow tabs contain: Secondary figure data
	Databases that are too big or too complicated to be included in an excel sheet are downloadable from FigTree:
	Supplementary figure 3:	https://doi.org/10.6084/m9.figshare.14865570.v4	Bonsai module databases for NPRS/PKS analysis
	Supplementary figure 6:	https://doi.org/10.6084/m9.figshare.14865576.v3	Anvi'o 7 pangenome database. From here you can access every single piece of metabolic, genomic and phylogenomic information shown in the paper, if you feel like it. Anvi'o has some good documentation to get you started. Have a look at their pangenomics tutorials for how to use this database.
	Supplementary figure 7:	https://doi.org/10.6084/m9.figshare.14865567.v6	Biotin operon map json and html files

## Sheet: Fig 2a. ANI scores
Average Nucleotide Identity (ANI) percentage similarity scores between all genomes.
layers	Cmasu2	GCA0000070251ASM702v1	GCA0000080451ASM804v1	GCA0000121451ASM1214v1	GCA0000123851ASM1238v1	GCA0000143451ASM1434v1	GCA0000166251ASM1662v1	GCA0000174453ASM1744v3	GCA0000182051ASM1820v1	GCA0000182251ASM1822v1	GCA0000182451ASM1824v1	GCA0000215251ASM2152v1	GCA0000227851ASM2278v1	GCA0000230051ASM2300v1	GCA0001669351ASM16693v1	GCA0001957351ASM19573v1	GCA0002212051ASM22120v1	GCA0002378451ASM23784v1	GCA0002467152ASM24671v2	GCA0002476252ASM24762v2	GCA0002523651ASM25236v1	GCA0002553551ASM25535v1	GCA0002574351RcoIn10	GCA0002613251RcoCa10	GCA0002630551Rho10	GCA0002638151RcoIs10	GCA0002652252ASM26522v2	GCA0002737451Rau10	GCA0002771651ASM27716v1	GCA0002771851ASM27718v1	GCA0002772051ASM27720v1	GCA0002772251ASM27722v1	GCA0002772451ASM27724v1	GCA0002772651ASM27726v1	GCA0002772851ASM27728v1	GCA0002773051ASM27730v1	GCA0002835951ASM28359v1	GCA0002837751ASM28377v1	GCA0002837951ASM28379v1	GCA0002838151ASM28381v1	GCA0002838351ASM28383v1	GCA0002838551ASM28385v1	GCA0002839151ASM28391v1	GCA0002839351ASM28393v1	GCA0002839551ASM28395v1	GCA0002839951ASM28399v1	GCA0002840551ASM28405v1	GCA0002840751ASM28407v1	GCA0002841551ASM28415v1
Blapp1	0.814208	0.809716	0.79706	0.812846	0.949428	0.807813	0.811792	0.808229	0.80517	0.808284	0.949059	0.811393	0.798601	0.809839	0.810162	0.79857	0.810064	0.810387	0.81005	0.810292	0.810403	0.811141	0.810292	0.809992	0.810516	0.810798	0.968908	0.808022	0.798598	0.798588	0.798611	0.798597	0.798544	0.79853	0.797059	0.797056	0.809257	0.808157	0.808048	0.808233	0.808157	0.810006	0.807778	0.808362	0.808533	0.808767	0.8095	0.809588	0.807353
Btrans1	0.812823	0.807169	0.795793	0.81507	0.961992	0.806713	0.811804	0.80586	0.802602	0.80614	0.961616	0.810258	0.796788	0.807104	0.806908	0.796756	0.806681	0.807527	0.806905	0.806956	0.807444	0.810809	0.806971	0.806837	0.806526	0.806963	0.946834	0.807678	0.796791	0.796797	0.796807	0.796826	0.796777	0.796749	0.795788	0.795782	0.806523	0.805462	0.80582	0.805885	0.80582	0.807727	0.806863	0.805668	0.806174	0.808692	0.809246	0.807643	0.806471
Choog2	0.811483	0.805691	0.795496	0.808375	0.939157	0.80369	0.80539	0.804713	0.803298	0.804845	0.939435	0.805707	0.797668	0.80527	0.806277	0.797628	0.804647	0.805826	0.806371	0.806179	0.805829	0.809207	0.805722	0.805709	0.805677	0.806484	0.965311	0.804015	0.797665	0.797659	0.797678	0.797682	0.797635	0.797602	0.795492	0.795489	0.804387	0.804761	0.804713	0.804713	0.804716	0.806096	0.803976	0.80506	0.804853	0.80519	0.80509	0.804675	0.80413
Cmasu2	1	0.923233	0.866971	0.949747	0.810984	0.882747	0.921099	0.920765	0.920773	0.921073	0.810829	0.92336	0.870022	0.921133	0.922805	0.870033	0.923108	0.924363	0.922943	0.922771	0.92435	0.922444	0.923262	0.923148	0.92378	0.922651	0.812459	0.929556	0.870038	0.870071	0.870049	0.869995	0.869898	0.869969	0.867036	0.867073	0.923461	0.920768	0.920777	0.920755	0.920372	0.923761	0.882855	0.921019	0.920948	0.919041	0.918462	0.923175	0.929137
Dallo3	0.814217	0.809376	0.793879	0.8113	0.92666	0.806153	0.810786	0.808221	0.804252	0.808144	0.926623	0.809503	0.795753	0.808899	0.809036	0.795723	0.808862	0.809883	0.808906	0.809076	0.809905	0.811362	0.809461	0.809584	0.809414	0.809818	0.926972	0.808438	0.795754	0.795752	0.795765	0.795989	0.795719	0.795697	0.793876	0.793874	0.809284	0.808083	0.808178	0.80822	0.8082	0.809084	0.806354	0.808281	0.808141	0.808128	0.80991	0.809092	0.808075
Drufa1	0.810279	0.803912	0.794181	0.807398	0.940841	0.804454	0.803784	0.803787	0.80177	0.804073	0.941047	0.804503	0.795898	0.804022	0.804561	0.795843	0.804589	0.804724	0.80454	0.804348	0.804843	0.807688	0.803661	0.80395	0.804191	0.804279	0.965215	0.803982	0.795886	0.795859	0.795876	0.795919	0.795954	0.796006	0.794177	0.794176	0.804689	0.803646	0.803687	0.803788	0.8038	0.805342	0.805113	0.803914	0.804007	0.803681	0.804564	0.804751	0.80344
Earac4	0.957214	0.919464	0.863467	0.952841	0.812192	0.878593	0.918073	0.916547	0.915036	0.916498	0.812035	0.919144	0.867216	0.917982	0.918615	0.867317	0.920242	0.920693	0.919171	0.919361	0.92071	0.919729	0.919535	0.919976	0.920395	0.919659	0.81135	0.923578	0.867242	0.867353	0.867259	0.867249	0.86717	0.867508	0.863473	0.863508	0.920446	0.916392	0.916647	0.916561	0.916967	0.919381	0.879236	0.917403	0.916609	0.916859	0.916869	0.920789	0.922683
Econn1	0.943451	0.924268	0.869319	0.937156	0.814932	0.885671	0.925168	0.922461	0.915271	0.922453	0.815527	0.925468	0.871912	0.923766	0.924118	0.871852	0.923105	0.925463	0.924256	0.924322	0.925463	0.923879	0.924204	0.923491	0.924434	0.923706	0.813885	0.922324	0.871892	0.871889	0.871897	0.871965	0.871859	0.871829	0.869147	0.869169	0.923835	0.922835	0.922566	0.922468	0.922488	0.9251	0.88653	0.92297	0.922662	0.922345	0.922926	0.926818	0.922074
GCA0000070251ASM702v1	0.923485	1	0.864615	0.917889	0.805356	0.880083	0.966253	0.979277	0.90248	0.979718	0.805603	0.985096	0.86705	0.987428	0.987553	0.867012	0.972572	0.988847	0.988082	0.987747	0.988861	0.922598	0.997859	0.990704	0.982039	0.989542	0.809443	0.909408	0.867094	0.867037	0.866931	0.867041	0.867033	0.867008	0.864606	0.864642	0.973715	0.979422	0.979421	0.979355	0.979322	0.965321	0.879918	0.980521	0.979746	0.980861	0.96421	0.966692	0.909248
GCA0000080451ASM804v1	0.866633	0.862404	1	0.863212	0.795924	0.84841	0.864191	0.861696	0.860156	0.86181	0.796095	0.862495	0.914928	0.861015	0.861764	0.91492	0.861873	0.863307	0.862153	0.861815	0.863206	0.864042	0.862312	0.861825	0.862709	0.861603	0.797987	0.864575	0.915156	0.914959	0.914938	0.915143	0.914824	0.914876	0.999921	0.999871	0.862154	0.861482	0.861553	0.86161	0.861456	0.864271	0.848549	0.862088	0.86182	0.861767	0.862064	0.865016	0.864134
GCA0000121451ASM1214v1	0.948711	0.916938	0.863931	1	0.806281	0.879968	0.917533	0.914391	0.917477	0.915338	0.806254	0.918302	0.867264	0.916697	0.917232	0.86754	0.917477	0.918663	0.918609	0.918483	0.918692	0.916856	0.917503	0.917955	0.919131	0.917044	0.811754	0.921774	0.86729	0.867564	0.867429	0.867407	0.867481	0.867473	0.863824	0.863725	0.918321	0.915124	0.914595	0.914549	0.914601	0.917481	0.879516	0.915343	0.915092	0.914343	0.908958	0.918418	0.9218
GCA0000123851ASM1238v1	0.813052	0.806624	0.797002	0.808965	1	0.805431	0.810109	0.805441	0.803919	0.805677	0.995951	0.808141	0.798058	0.806799	0.807066	0.797902	0.807402	0.807288	0.807107	0.807176	0.80731	0.809773	0.806837	0.807754	0.806769	0.807423	0.947927	0.806165	0.798072	0.797929	0.797964	0.798126	0.797925	0.797915	0.796997	0.797026	0.807554	0.805309	0.805313	0.805402	0.805399	0.808342	0.805424	0.805671	0.805557	0.810215	0.809862	0.808072	0.805716
GCA0000143451ASM1434v1	0.884488	0.879651	0.848739	0.87856	0.807182	1	0.879614	0.879511	0.869381	0.879527	0.80665	0.881694	0.851092	0.879823	0.878789	0.850886	0.880237	0.880868	0.88045	0.881014	0.880852	0.887037	0.881	0.881649	0.882482	0.881392	0.809036	0.872984	0.851074	0.850912	0.850923	0.851061	0.850659	0.850821	0.848739	0.849004	0.880896	0.8794	0.879814	0.87953	0.879444	0.880471	0.986518	0.879455	0.88019	0.879389	0.881006	0.880286	0.872936
GCA0000166251ASM1662v1	0.923881	0.965779	0.865894	0.918513	0.810879	0.87912	1	0.962057	0.905471	0.962566	0.811077	0.966744	0.869099	0.96386	0.965172	0.869067	0.965654	0.968194	0.965876	0.965693	0.968216	0.920808	0.965415	0.965704	0.96681	0.964984	0.810885	0.91143	0.869118	0.8691	0.869114	0.869231	0.869001	0.869011	0.865726	0.865748	0.967006	0.962094	0.962271	0.962189	0.962127	0.987901	0.8803	0.963137	0.962614	0.962142	0.965573	0.983159	0.91143
GCA0000174453ASM1744v3	0.922305	0.979778	0.863687	0.916271	0.8061	0.879545	0.963275	1	0.902725	0.998792	0.806486	0.98497	0.86617	0.979148	0.979577	0.866083	0.970275	0.982987	0.980025	0.979482	0.983017	0.920946	0.979456	0.979436	0.979038	0.978506	0.809437	0.909574	0.866161	0.866119	0.866117	0.866233	0.865774	0.865774	0.863557	0.863627	0.970952	0.998729	0.999685	0.999916	0.999798	0.961693	0.878793	0.995359	0.998852	0.992641	0.961216	0.964137	0.908982
GCA0000182051ASM1820v1	0.922226	0.903587	0.858424	0.918334	0.803277	0.870054	0.90651	0.901797	1	0.902251	0.803511	0.904797	0.863671	0.902882	0.903264	0.863608	0.903416	0.904953	0.903382	0.903882	0.904965	0.902455	0.90294	0.903154	0.903339	0.903426	0.805193	0.951737	0.863662	0.863649	0.863656	0.863644	0.863618	0.86371	0.858414	0.858413	0.90361	0.901719	0.90168	0.901725	0.90173	0.905741	0.869999	0.902104	0.902093	0.902418	0.904824	0.906261	0.951083
GCA0000182251ASM1822v1	0.923141	0.979838	0.864596	0.917105	0.805901	0.878796	0.963938	0.998772	0.903391	1	0.806495	0.985317	0.867211	0.979377	0.979639	0.867141	0.970187	0.983118	0.980104	0.97968	0.983137	0.922354	0.979825	0.980026	0.979048	0.978722	0.809505	0.909117	0.867194	0.867174	0.867171	0.86729	0.867356	0.867049	0.864486	0.864556	0.971069	0.999076	0.999007	0.998874	0.998972	0.962475	0.879126	0.995576	0.999336	0.993093	0.961994	0.964155	0.909033
GCA0000182451ASM1824v1	0.812261	0.806695	0.795902	0.807799	0.995628	0.805491	0.810553	0.805338	0.803144	0.805519	1	0.807153	0.79791	0.806648	0.807317	0.79769	0.805609	0.807121	0.807315	0.807	0.807148	0.809712	0.806631	0.807003	0.806431	0.807484	0.947158	0.805626	0.797643	0.797717	0.79773	0.797628	0.797599	0.797594	0.795896	0.796138	0.805837	0.805279	0.805383	0.805341	0.805272	0.808577	0.80537	0.805305	0.80547	0.810086	0.809201	0.808005	0.805358
GCA0000215251ASM2152v1	0.92443	0.984565	0.865086	0.919966	0.808125	0.8826	0.965763	0.98457	0.905979	0.984888	0.808976	1	0.869094	0.98359	0.983887	0.869057	0.974102	0.98811	0.98423	0.983709	0.988124	0.918208	0.984701	0.984769	0.983267	0.983208	0.811488	0.906226	0.869083	0.869087	0.869098	0.869096	0.869072	0.869109	0.865075	0.865094	0.975005	0.984608	0.984725	0.984583	0.984651	0.966342	0.882277	0.985107	0.984901	0.985141	0.965378	0.963206	0.91167
GCA0000227851ASM2278v1	0.870712	0.868477	0.912261	0.867782	0.79684	0.850704	0.868034	0.867452	0.862655	0.867473	0.797226	0.868911	1	0.867352	0.868738	0.999517	0.868523	0.868957	0.868981	0.868602	0.869091	0.869193	0.868527	0.868324	0.86813	0.868728	0.797405	0.86669	0.999836	0.999637	0.999641	0.999768	0.998768	0.998808	0.91229	0.912182	0.86866	0.867207	0.867322	0.867351	0.867325	0.86791	0.850816	0.867714	0.867526	0.867285	0.867918	0.869319	0.866682
GCA0000230051ASM2300v1	0.922663	0.987471	0.864537	0.917897	0.807707	0.880719	0.964614	0.978686	0.903495	0.979115	0.808189	0.984459	0.869202	1	0.9884	0.869134	0.97173	0.987994	0.988952	0.988437	0.987971	0.923916	0.987318	0.98719	0.981157	0.986199	0.811155	0.910882	0.869369	0.869167	0.869173	0.869271	0.869181	0.869091	0.864608	0.864666	0.972868	0.978882	0.978868	0.978753	0.978709	0.96442	0.881284	0.979469	0.979408	0.979326	0.963304	0.965425	0.910498
GCA0001669351ASM16693v1	0.922748	0.987624	0.864083	0.918556	0.806223	0.881023	0.965861	0.979185	0.903548	0.979662	0.806411	0.984596	0.866848	0.988898	1	0.866783	0.972281	0.987982	0.99876	0.993255	0.987972	0.92313	0.987355	0.987436	0.981512	0.986136	0.810394	0.910041	0.866838	0.866826	0.86683	0.866818	0.866979	0.866895	0.86406	0.86408	0.972728	0.97955	0.979526	0.979377	0.979371	0.965527	0.880896	0.980125	0.979735	0.980626	0.964498	0.966951	0.910273
GCA0001957351ASM19573v1	0.870242	0.867418	0.913055	0.867887	0.79773	0.851171	0.86831	0.866399	0.862594	0.866584	0.798207	0.868728	0.999496	0.866543	0.868089	1	0.867763	0.868203	0.868203	0.867607	0.868295	0.870289	0.867418	0.867385	0.867237	0.867667	0.798089	0.867413	0.99951	0.999828	0.999639	0.99949	0.998773	0.998752	0.913047	0.912941	0.867914	0.866105	0.866217	0.866221	0.866217	0.868009	0.850912	0.866566	0.866342	0.866842	0.867493	0.868748	0.867371
GCA0002212051ASM22120v1	0.9216	0.971989	0.864297	0.917321	0.806094	0.878799	0.966601	0.969422	0.902335	0.969652	0.806817	0.974415	0.868229	0.971429	0.971372	0.868316	1	0.975504	0.972147	0.971728	0.975509	0.924176	0.971946	0.972524	0.973555	0.971357	0.808327	0.909268	0.868229	0.868212	0.868226	0.868304	0.868222	0.8682	0.864214	0.864229	0.990411	0.969232	0.969221	0.969191	0.969225	0.965613	0.878535	0.969808	0.96992	0.970339	0.964407	0.967179	0.908603
GCA0002378451ASM23784v1	0.924025	0.988696	0.863584	0.917873	0.805929	0.880322	0.96882	0.98314	0.901235	0.983252	0.806874	0.988543	0.86771	0.987877	0.987911	0.867657	0.975593	1	0.988251	0.987674	0.999901	0.923087	0.98869	0.988822	0.985433	0.987463	0.809493	0.908137	0.867753	0.86769	0.867691	0.867855	0.867417	0.867423	0.863412	0.863441	0.976699	0.983099	0.98322	0.983171	0.983144	0.967705	0.880539	0.984034	0.983446	0.984137	0.967559	0.969451	0.907863
GCA0002467152ASM24671v2	0.922229	0.987941	0.863361	0.919441	0.80486	0.88008	0.966291	0.979582	0.902555	0.980019	0.805317	0.984739	0.866949	0.98907	0.998731	0.866874	0.972402	0.988373	1	0.993334	0.988371	0.923519	0.987567	0.987768	0.981868	0.986352	0.809802	0.909987	0.866931	0.866922	0.866915	0.867103	0.866972	0.866995	0.863183	0.863213	0.973576	0.979749	0.97973	0.979666	0.979661	0.965472	0.880359	0.980637	0.980074	0.980817	0.964605	0.966599	0.909586
GCA0002476252ASM24762v2	0.923812	0.987291	0.864588	0.918522	0.805808	0.88209	0.965988	0.979005	0.902304	0.979427	0.806232	0.98401	0.868835	0.988306	0.993154	0.868834	0.971234	0.987723	0.993344	1	0.98772	0.923459	0.986803	0.98723	0.9812	0.985595	0.810405	0.908749	0.868863	0.868804	0.868878	0.86894	0.868858	0.868806	0.864458	0.864475	0.972395	0.979247	0.979078	0.979132	0.979057	0.964793	0.882257	0.979787	0.979435	0.980478	0.963779	0.966263	0.908406
GCA0002523651ASM25236v1	0.925291	0.988678	0.863907	0.918805	0.807236	0.881149	0.968863	0.982619	0.901938	0.982802	0.808261	0.988407	0.86763	0.987763	0.98789	0.867567	0.975035	0.999904	0.988264	0.987701	1	0.924561	0.988636	0.988681	0.985347	0.987424	0.811145	0.909544	0.867671	0.867605	0.867611	0.867773	0.86769	0.867685	0.86374	0.863771	0.976374	0.982695	0.982609	0.982684	0.982658	0.967499	0.881332	0.983545	0.983047	0.983886	0.967258	0.969386	0.908939
GCA0002553551ASM25535v1	0.922287	0.923359	0.863977	0.916984	0.809952	0.885783	0.921866	0.921144	0.901989	0.921402	0.809981	0.923495	0.868596	0.920625	0.922408	0.868569	0.923303	0.924583	0.922996	0.923491	0.924691	1	0.92345	0.923244	0.924574	0.922694	0.814118	0.907345	0.868946	0.868612	0.868588	0.869108	0.868615	0.868547	0.8638	0.863828	0.923932	0.920872	0.921141	0.921067	0.921061	0.924186	0.885888	0.921419	0.921663	0.919121	0.919347	0.922883	0.907626
GCA0002574351RcoIn10	0.922625	0.998043	0.86573	0.916986	0.806368	0.88223	0.966023	0.979302	0.902429	0.979664	0.806951	0.984937	0.868759	0.987177	0.986933	0.868671	0.972718	0.988464	0.987158	0.986767	0.988476	0.925422	1	0.990233	0.981839	0.989017	0.81068	0.909218	0.868938	0.868717	0.868718	0.868887	0.868667	0.868647	0.865792	0.865568	0.973378	0.979472	0.97946	0.979448	0.979384	0.964593	0.882064	0.98031	0.979725	0.980782	0.964237	0.96611	0.908541
GCA0002613251RcoCa10	0.9246	0.990844	0.864688	0.919414	0.807347	0.880256	0.966142	0.979038	0.904555	0.979495	0.807817	0.984806	0.868134	0.987175	0.987375	0.868028	0.972537	0.988288	0.987572	0.987108	0.988289	0.924222	0.990469	1	0.981902	0.994009	0.810645	0.910902	0.868059	0.868061	0.868052	0.868009	0.868239	0.86825	0.86476	0.864746	0.972891	0.979248	0.979227	0.979028	0.979112	0.965389	0.880791	0.98005	0.979426	0.980429	0.964285	0.966482	0.910575
GCA0002630551Rho10	0.923035	0.982012	0.863472	0.917833	0.807251	0.881672	0.966196	0.978324	0.903904	0.978675	0.807417	0.98341	0.868331	0.981129	0.981716	0.868244	0.97301	0.985463	0.981723	0.981188	0.985462	0.923693	0.981589	0.981479	1	0.980653	0.810408	0.909964	0.868318	0.868287	0.868296	0.868389	0.868663	0.868637	0.863401	0.863484	0.973479	0.978478	0.978447	0.97845	0.978375	0.965373	0.88167	0.979522	0.978693	0.979698	0.964129	0.966037	0.909869
GCA0002638151RcoIs10	0.922173	0.989035	0.862181	0.917812	0.80702	0.880958	0.965573	0.977854	0.904328	0.978222	0.80758	0.983013	0.867223	0.98569	0.986011	0.86717	0.970481	0.986886	0.986115	0.985554	0.986886	0.922767	0.98885	0.993912	0.980612	1	0.810795	0.910585	0.867215	0.867198	0.867269	0.867175	0.867243	0.867249	0.862171	0.862179	0.971408	0.978059	0.977949	0.977843	0.977852	0.964358	0.880205	0.978703	0.97806	0.978972	0.962741	0.96529	0.91061
GCA0002652252ASM26522v2	0.814566	0.808789	0.796294	0.813815	0.947555	0.805615	0.80887	0.80837	0.805081	0.808346	0.947758	0.807772	0.797985	0.8083	0.809169	0.797931	0.808828	0.808939	0.809188	0.809413	0.808956	0.813163	0.808951	0.809018	0.808962	0.808804	1	0.807366	0.797998	0.797966	0.79798	0.798028	0.797946	0.797923	0.796292	0.796291	0.808856	0.808091	0.808303	0.808375	0.808322	0.80902	0.805604	0.808355	0.808319	0.80866	0.80908	0.808534	0.807254
GCA0002737451Rau10	0.9284	0.910203	0.863936	0.922803	0.806602	0.873852	0.911149	0.907774	0.951121	0.908576	0.806872	0.909407	0.866309	0.90865	0.909824	0.866284	0.909416	0.911338	0.910448	0.910288	0.911336	0.908029	0.910129	0.909945	0.909952	0.910315	0.808757	1	0.866538	0.866315	0.866314	0.866565	0.866469	0.866452	0.863926	0.863906	0.909567	0.907659	0.907936	0.907776	0.907805	0.911621	0.873354	0.908913	0.90859	0.908826	0.908211	0.912706	0.999483
GCA0002771651ASM27716v1	0.869176	0.866414	0.914355	0.865179	0.797948	0.850916	0.867303	0.865135	0.863134	0.865504	0.797862	0.86796	0.999835	0.866648	0.866972	0.999481	0.866526	0.86767	0.866913	0.866569	0.867741	0.86907	0.866687	0.866758	0.866908	0.867017	0.797828	0.866588	1	0.999605	0.999617	0.999963	0.998811	0.998862	0.914344	0.914246	0.867019	0.865207	0.865049	0.865142	0.865044	0.866792	0.850963	0.865546	0.865395	0.865442	0.865733	0.866968	0.866218
GCA0002771851ASM27718v1	0.869983	0.867465	0.913076	0.867389	0.797777	0.85218	0.868279	0.867139	0.862894	0.867128	0.798086	0.868773	0.999634	0.866854	0.867924	0.999846	0.867759	0.868286	0.868005	0.867721	0.868378	0.870144	0.867474	0.868024	0.867505	0.867646	0.798355	0.867072	0.999644	1	0.999775	0.999595	0.998807	0.998853	0.913062	0.912972	0.868127	0.866772	0.86688	0.866963	0.866879	0.868175	0.851865	0.867459	0.867098	0.867102	0.868035	0.868788	0.867034
GCA0002772051ASM27720v1	0.870063	0.867138	0.913169	0.867965	0.797517	0.851601	0.867612	0.866749	0.862432	0.866735	0.797905	0.868582	0.999658	0.866798	0.86806	0.999657	0.867364	0.867898	0.868147	0.867649	0.867992	0.870393	0.867148	0.868216	0.867854	0.867812	0.798327	0.866863	0.999678	0.999775	1	0.999629	0.99881	0.998855	0.913155	0.913064	0.86767	0.866388	0.866499	0.866578	0.866497	0.867762	0.851535	0.867064	0.866696	0.866914	0.867613	0.868623	0.86681
GCA0002772251ASM27722v1	0.869434	0.866952	0.914156	0.865722	0.798238	0.851071	0.867262	0.865963	0.863862	0.866357	0.798236	0.868065	0.999815	0.866979	0.866788	0.999458	0.866198	0.868257	0.86683	0.866901	0.868327	0.86938	0.867152	0.867405	0.867467	0.867697	0.798799	0.867676	0.999963	0.999582	0.999597	1	0.998811	0.998878	0.914194	0.914107	0.866854	0.866113	0.865931	0.865967	0.865888	0.867491	0.851292	0.866319	0.866313	0.866104	0.866741	0.867743	0.867378
GCA0002772451ASM27724v1	0.869736	0.866323	0.915623	0.867021	0.79695	0.850339	0.867621	0.866304	0.863561	0.86697	0.797394	0.867357	0.998789	0.86541	0.866538	0.998857	0.866894	0.867913	0.866805	0.86616	0.867981	0.869089	0.866512	0.866546	0.867262	0.867253	0.798892	0.866864	0.998816	0.998905	0.99889	0.998794	1	0.999656	0.915644	0.915643	0.866905	0.866353	0.866305	0.866391	0.86622	0.867798	0.85112	0.867027	0.866679	0.866046	0.867157	0.868142	0.866527
GCA0002772651ASM27726v1	0.86927	0.86661	0.914382	0.865015	0.797723	0.850426	0.866672	0.864781	0.862729	0.865194	0.797914	0.867157	0.998865	0.865942	0.865905	0.998928	0.86593	0.867048	0.865918	0.865792	0.867114	0.868949	0.866437	0.866592	0.866726	0.866757	0.798783	0.866927	0.998886	0.998979	0.998956	0.998879	0.999653	1	0.914421	0.914338	0.866307	0.86488	0.864688	0.864786	0.864688	0.866761	0.850729	0.865419	0.865149	0.865286	0.86658	0.867066	0.866429
GCA0002772851ASM27728v1	0.866067	0.862373	0.999965	0.863349	0.794764	0.848661	0.864108	0.862125	0.860322	0.862172	0.794989	0.862501	0.914286	0.86148	0.862349	0.914197	0.863059	0.863537	0.862668	0.862074	0.863435	0.864116	0.862295	0.86205	0.862777	0.862091	0.797084	0.863667	0.914432	0.914238	0.914214	0.914417	0.914084	0.914154	1	0.999939	0.863083	0.861892	0.861982	0.862046	0.861885	0.864346	0.849215	0.862053	0.862181	0.862013	0.862646	0.86508	0.86328
GCA0002773051ASM27730v1	0.866093	0.863714	0.999651	0.862593	0.795266	0.847418	0.865048	0.862787	0.857645	0.862748	0.79526	0.863731	0.914419	0.863275	0.863582	0.914389	0.863478	0.863931	0.863745	0.863867	0.864008	0.863371	0.863944	0.863598	0.863407	0.862854	0.795923	0.86305	0.914643	0.914427	0.91444	0.914555	0.914474	0.914484	0.999804	1	0.863872	0.862355	0.862734	0.86276	0.862674	0.865202	0.847961	0.86381	0.862695	0.863383	0.864805	0.865264	0.86254
GCA0002835951ASM28359v1	0.921704	0.973685	0.864121	0.918536	0.806395	0.880639	0.966056	0.970819	0.903177	0.971139	0.806052	0.975732	0.867968	0.972633	0.972915	0.867933	0.990628	0.976462	0.97326	0.973287	0.976403	0.922783	0.973509	0.973993	0.973791	0.972682	0.809818	0.909004	0.868203	0.867944	0.867953	0.868087	0.867956	0.86792	0.864149	0.864149	1	0.970784	0.970996	0.970765	0.970852	0.965162	0.879429	0.971348	0.971354	0.971268	0.96556	0.96769	0.908908
GCA0002837751ASM28377v1	0.921895	0.979793	0.864865	0.917109	0.805721	0.879206	0.963463	0.998687	0.902391	0.999063	0.806231	0.984986	0.86785	0.978992	0.979923	0.867764	0.96988	0.983093	0.98045	0.979958	0.983131	0.920921	0.979818	0.979931	0.97896	0.978793	0.810383	0.908531	0.867834	0.867798	0.867796	0.8679	0.867749	0.867857	0.864733	0.864802	0.970958	1	0.998936	0.998848	0.998909	0.962108	0.879131	0.995281	0.999098	0.992534	0.961052	0.964393	0.908372
GCA0002837951ASM28379v1	0.922771	0.979631	0.863787	0.916866	0.806772	0.880155	0.963363	0.999713	0.902788	0.999036	0.807331	0.984782	0.866956	0.979012	0.979568	0.866887	0.96953	0.982925	0.979797	0.979221	0.982938	0.921539	0.979375	0.979562	0.978727	0.978522	0.809582	0.909672	0.866943	0.86692	0.866917	0.866986	0.866939	0.867013	0.863687	0.863696	0.970278	0.998885	1	0.99975	0.99983	0.962161	0.879956	0.995351	0.999021	0.992713	0.960711	0.963552	0.909046
GCA0002838151ASM28381v1	0.921238	0.980032	0.864537	0.915373	0.805092	0.878422	0.963194	0.999868	0.901837	0.99892	0.805157	0.985171	0.867936	0.97926	0.979453	0.867815	0.96938	0.9831	0.979906	0.979586	0.983122	0.921764	0.979997	0.979818	0.979375	0.978735	0.807987	0.908331	0.867924	0.867852	0.867885	0.867934	0.867745	0.867655	0.864587	0.86456	0.970534	0.998864	0.999743	1	0.999855	0.962494	0.878498	0.995314	0.998889	0.992832	0.962111	0.964157	0.908655
GCA0002838351ASM28383v1	0.922458	0.979404	0.864294	0.916018	0.805699	0.878687	0.963221	0.999726	0.902337	0.998927	0.806249	0.984914	0.86677	0.979011	0.979156	0.866676	0.970194	0.982924	0.979851	0.979204	0.982929	0.921868	0.979309	0.979585	0.979106	0.978406	0.809414	0.908849	0.866757	0.866723	0.86672	0.866709	0.867013	0.866824	0.864385	0.864454	0.970812	0.99884	0.999752	0.999849	1	0.961772	0.87826	0.995234	0.998983	0.992717	0.961478	0.963652	0.908815
GCA0002838551ASM28385v1	0.923866	0.965391	0.866179	0.918114	0.806504	0.879082	0.988398	0.962521	0.904867	0.962695	0.807076	0.96768	0.868226	0.964924	0.965491	0.868224	0.9652	0.96844	0.965843	0.965501	0.968486	0.924399	0.965484	0.965875	0.966344	0.964873	0.810579	0.90991	0.868253	0.86826	0.868272	0.868244	0.868086	0.868184	0.866183	0.866218	0.965695	0.962405	0.962632	0.962458	0.96247	1	0.879273	0.963233	0.962703	0.963665	0.966389	0.982134	0.909234
GCA0002839151ASM28391v1	0.884072	0.880774	0.847317	0.878655	0.805247	0.986534	0.880093	0.878687	0.869274	0.878742	0.80531	0.881617	0.85027	0.880044	0.879229	0.850264	0.880102	0.881485	0.880421	0.880942	0.881483	0.887927	0.881236	0.880789	0.880951	0.880753	0.808353	0.873189	0.850278	0.850307	0.850315	0.85031	0.850185	0.850154	0.847343	0.847515	0.879645	0.878477	0.878795	0.878583	0.878447	0.879937	1	0.878726	0.879295	0.879053	0.879553	0.879755	0.872975
GCA0002839351ASM28393v1	0.921785	0.980761	0.863413	0.916556	0.804643	0.879993	0.96397	0.99518	0.902651	0.995566	0.805147	0.985957	0.867573	0.979926	0.980014	0.867427	0.970675	0.983985	0.980464	0.980332	0.983951	0.923046	0.980496	0.980521	0.979882	0.979402	0.808841	0.908253	0.867559	0.867534	0.867532	0.867566	0.867241	0.86713	0.863314	0.863341	0.971291	0.995353	0.995297	0.99524	0.995299	0.963178	0.880081	1	0.995505	0.994074	0.962949	0.964416	0.908217
GCA0002839551ASM28395v1	0.922228	0.979859	0.86521	0.915811	0.80648	0.880554	0.963699	0.998849	0.902188	0.999343	0.806853	0.985553	0.867807	0.979547	0.979856	0.867744	0.9703	0.983341	0.980109	0.979908	0.98335	0.92271	0.979771	0.979943	0.979172	0.978967	0.810887	0.90894	0.867793	0.867781	0.867776	0.867797	0.867707	0.867747	0.865137	0.865146	0.971366	0.999121	0.998973	0.998882	0.998967	0.96262	0.880884	0.995595	1	0.993059	0.961901	0.964672	0.908722
GCA0002839951ASM28399v1	0.920363	0.981162	0.863356	0.915045	0.810745	0.878174	0.963291	0.992665	0.902595	0.992984	0.811191	0.985245	0.865893	0.979657	0.98079	0.865819	0.970001	0.984376	0.981083	0.980577	0.98443	0.921537	0.981131	0.981178	0.979881	0.979931	0.809515	0.908153	0.865872	0.865858	0.865867	0.865972	0.865912	0.865896	0.86345	0.863365	0.971124	0.992731	0.99283	0.99277	0.992765	0.963396	0.878487	0.99389	0.993012	1	0.961686	0.964546	0.908154
GCA0002840551ASM28405v1	0.919332	0.963665	0.865328	0.91443	0.81021	0.879664	0.963618	0.960417	0.905679	0.960785	0.810701	0.964685	0.868154	0.961623	0.962841	0.868119	0.963758	0.965889	0.963508	0.963181	0.96605	0.92097	0.963569	0.96378	0.964369	0.962747	0.810392	0.908218	0.868171	0.868155	0.868168	0.868285	0.868188	0.86826	0.865208	0.865298	0.964527	0.960607	0.960599	0.960726	0.960694	0.966013	0.880441	0.96168	0.961061	0.960042	1	0.966808	0.908066
GCA0002840751ASM28407v1	0.923839	0.966602	0.865364	0.917889	0.806449	0.879993	0.982791	0.963087	0.904275	0.963414	0.807168	0.967742	0.869308	0.964982	0.966417	0.86925	0.966771	0.969198	0.967043	0.966528	0.96923	0.924221	0.966713	0.966953	0.966728	0.966251	0.808724	0.911844	0.869332	0.869288	0.86932	0.86933	0.869337	0.86929	0.865417	0.86544	0.967643	0.96322	0.963208	0.963191	0.963004	0.98169	0.879779	0.963964	0.963472	0.963305	0.967283	1	0.911625
GCA0002841551ASM28415v1	0.930348	0.909517	0.863745	0.923115	0.80598	0.874228	0.910911	0.907933	0.950979	0.908518	0.806187	0.910529	0.867363	0.909094	0.910106	0.867239	0.909455	0.911328	0.910278	0.910079	0.911348	0.908789	0.909075	0.909855	0.910335	0.909948	0.809038	0.999937	0.867245	0.867273	0.867398	0.867228	0.867096	0.867144	0.863736	0.863766	0.909609	0.907932	0.908147	0.907895	0.90801	0.910407	0.87429	0.908343	0.908443	0.908214	0.907411	0.910502	1
GCA0002841751ASM28417v1	0.923938	0.967626	0.865223	0.92195	0.81558	0.88153	0.968907	0.964794	0.906859	0.965242	0.815856	0.969205	0.869154	0.966422	0.967212	0.869226	0.967567	0.970237	0.967766	0.967546	0.970316	0.925735	0.967793	0.967653	0.968566	0.96686	0.811358	0.913408	0.869136	0.86925	0.869191	0.869021	0.869159	0.86909	0.865213	0.865235	0.968245	0.965056	0.96508	0.964922	0.964965	0.968845	0.882038	0.965402	0.965415	0.966144	0.968212	0.969846	0.913156
GCA0002841951ASM28419v1	0.922366	0.988538	0.865321	0.917742	0.807167	0.879128	0.96515	0.980295	0.903023	0.98076	0.807619	0.984572	0.868651	0.989365	0.989823	0.868661	0.973598	0.988937	0.99037	0.989364	0.988994	0.922752	0.988371	0.988304	0.98241	0.987164	0.810331	0.909367	0.868815	0.868648	0.868639	0.868773	0.868677	0.868647	0.865319	0.865349	0.97418	0.980414	0.980494	0.980426	0.980408	0.965975	0.880102	0.980981	0.980901	0.980309	0.963899	0.967733	0.908947
GCA0003026352ASM30263v2	0.9245	0.97399	0.865826	0.919389	0.807564	0.882721	0.967256	0.970656	0.904816	0.971126	0.807365	0.975884	0.867929	0.973222	0.973146	0.867867	0.990571	0.976939	0.973509	0.973023	0.976949	0.924673	0.973694	0.973886	0.974311	0.972598	0.810338	0.91197	0.86793	0.867897	0.867908	0.868015	0.868007	0.86793	0.865692	0.8657	0.999893	0.970766	0.970725	0.970616	0.970704	0.966104	0.881675	0.971448	0.971122	0.971353	0.966489	0.968122	0.911252
GCA0003639051ASM36390v1	0.870978	0.869577	0.912625	0.867542	0.797118	0.852447	0.869266	0.868493	0.862866	0.868553	0.797406	0.869917	0.999233	0.868573	0.869319	0.999641	0.869415	0.86996	0.869587	0.868933	0.870116	0.868669	0.869573	0.869353	0.868833	0.869774	0.798017	0.866963	0.999244	0.999602	0.999417	0.999174	0.998504	0.998521	0.912656	0.912565	0.869579	0.868337	0.86825	0.868323	0.868168	0.868345	0.852433	0.868929	0.868544	0.868244	0.86866	0.870211	0.866995
GCA0003674051ASM36740v1	0.871571	0.868138	0.91256	0.866802	0.79705	0.852754	0.867796	0.867279	0.863346	0.867319	0.797137	0.86823	0.999661	0.867792	0.868179	0.999378	0.868701	0.868851	0.868182	0.868044	0.86888	0.86857	0.867995	0.867655	0.868028	0.8681	0.797946	0.866993	0.999805	0.999431	0.999456	0.999735	0.998572	0.998621	0.9126	0.912509	0.868502	0.86676	0.867116	0.867179	0.867095	0.867608	0.852448	0.867727	0.867186	0.867018	0.868029	0.868665	0.86698
GCA0003854751	0.870294	0.867181	0.912644	0.866124	0.796167	0.850548	0.867856	0.866493	0.86185	0.866619	0.796426	0.867163	0.998707	0.866043	0.866384	0.998762	0.867298	0.867591	0.866603	0.866343	0.867677	0.868319	0.867166	0.866463	0.867543	0.867277	0.796689	0.866168	0.998721	0.998811	0.9988	0.998709	0.999503	0.999831	0.912635	0.912546	0.868123	0.866501	0.866422	0.866492	0.866333	0.867071	0.851012	0.866708	0.866581	0.86636	0.866907	0.868503	0.86606
GCA0003854951	0.871083	0.868564	0.912769	0.866145	0.798308	0.851832	0.869024	0.867755	0.863255	0.86792	0.798434	0.869006	0.999946	0.867474	0.868498	0.999562	0.868807	0.869287	0.868547	0.867856	0.86938	0.868279	0.868592	0.868669	0.868408	0.869299	0.799435	0.867541	0.999826	0.999613	0.999606	0.999718	0.998758	0.998794	0.912789	0.912697	0.868947	0.867548	0.867569	0.86765	0.867595	0.86835	0.851754	0.867954	0.867912	0.867604	0.868573	0.868896	0.867636
GCA0004858451RicGra10	0.922971	0.968094	0.865384	0.919198	0.80826	0.881478	0.968219	0.964984	0.9058	0.965225	0.808182	0.96884	0.867732	0.966499	0.967512	0.867699	0.969037	0.971465	0.968227	0.968311	0.971482	0.921891	0.968395	0.968898	0.968966	0.96775	0.812164	0.910456	0.867905	0.867736	0.867742	0.867913	0.867621	0.867567	0.865377	0.865395	0.970117	0.964858	0.964926	0.964912	0.964915	0.968006	0.881156	0.96548	0.965297	0.965071	0.966076	0.968986	0.910889
GCA0004996652RMONA1	0.929634	0.936679	0.868672	0.921594	0.812048	0.885914	0.932031	0.934395	0.90918	0.934721	0.812092	0.93149	0.871457	0.935868	0.935584	0.871519	0.935931	0.938603	0.936247	0.936111	0.938541	0.929081	0.936595	0.936725	0.937402	0.936496	0.813339	0.911548	0.871493	0.871555	0.871503	0.871471	0.871691	0.871669	0.868662	0.868683	0.936234	0.934595	0.934509	0.934362	0.934374	0.937246	0.886328	0.935628	0.935014	0.935242	0.930844	0.931885	0.916132
GCA0008256851RickettsiahoogstraaliiCroatica	0.949655	0.921714	0.867144	0.942197	0.810862	0.882073	0.921993	0.919049	0.922449	0.919088	0.811704	0.921703	0.869443	0.920736	0.920425	0.869402	0.920201	0.922253	0.921376	0.921939	0.92227	0.919716	0.921777	0.921938	0.922194	0.921223	0.811074	0.927777	0.869454	0.86944	0.869444	0.869535	0.869503	0.86948	0.867133	0.867167	0.921055	0.918997	0.919492	0.919075	0.919098	0.922744	0.881746	0.919424	0.919149	0.919396	0.922401	0.923413	0.92764
GCA0008315251ASM83152v1	0.921967	0.979851	0.8645	0.91598	0.805029	0.878269	0.963664	0.998771	0.902385	0.999937	0.805606	0.985338	0.868021	0.97942	0.979696	0.867943	0.969981	0.983085	0.980141	0.979858	0.983137	0.920313	0.979674	0.979991	0.979148	0.978835	0.808458	0.908458	0.868015	0.867978	0.867878	0.867902	0.867805	0.867822	0.864494	0.864564	0.971024	0.999069	0.99902	0.998861	0.998937	0.962361	0.878346	0.995598	0.999402	0.992893	0.961792	0.964067	0.907903
GCA0008315451ASM83154v1	0.921892	0.979699	0.864961	0.915503	0.804839	0.876979	0.963458	0.999806	0.901939	0.9988	0.805221	0.985029	0.867889	0.979269	0.979485	0.8676	0.969927	0.983249	0.980115	0.979597	0.983266	0.921454	0.979668	0.979768	0.979193	0.978615	0.808178	0.908226	0.867878	0.867717	0.867741	0.867821	0.867724	0.867663	0.865011	0.865082	0.970989	0.998731	0.999645	0.999827	0.999875	0.962263	0.877031	0.995287	0.998832	0.99271	0.962022	0.964091	0.908487
GCA0009646651ASM96466v1	0.949736	0.918239	0.864088	0.999918	0.808095	0.878378	0.918261	0.914276	0.917583	0.914899	0.807847	0.918406	0.869602	0.91751	0.917616	0.869577	0.918186	0.918243	0.91855	0.919282	0.918239	0.918378	0.91832	0.918625	0.919393	0.917567	0.813084	0.923717	0.869624	0.869612	0.869619	0.86952	0.869504	0.869351	0.864089	0.864119	0.919274	0.914539	0.914296	0.914225	0.914158	0.917886	0.879159	0.915192	0.914844	0.915229	0.914775	0.91919	0.923329
GCA0009646751ASM96467v1	0.919501	0.964147	0.863792	0.916029	0.814695	0.875978	0.962384	0.960148	0.903062	0.960514	0.815179	0.964663	0.867335	0.961889	0.963522	0.867307	0.963968	0.966828	0.963862	0.963449	0.966917	0.918856	0.963893	0.963481	0.965196	0.962757	0.808114	0.907534	0.86735	0.867342	0.867349	0.867342	0.86722	0.867243	0.863783	0.863797	0.964737	0.960296	0.960459	0.960309	0.960339	0.965709	0.876907	0.96143	0.960658	0.959706	0.993537	0.966339	0.907799
GCA0009649051ASM96490v1	0.925293	0.964461	0.865323	0.918299	0.806041	0.880697	0.988186	0.961001	0.905779	0.961297	0.806231	0.966838	0.868212	0.963836	0.964353	0.86819	0.963522	0.967304	0.965318	0.965296	0.967476	0.923365	0.964988	0.965114	0.965673	0.964599	0.809934	0.912342	0.868228	0.86824	0.868289	0.86836	0.868376	0.868292	0.865178	0.865186	0.964279	0.961287	0.961472	0.961355	0.961223	0.999978	0.880489	0.962134	0.961616	0.962284	0.966028	0.982064	0.91288
GCA0009650051ASM96500v1	0.811595	0.806745	0.795482	0.807466	0.992603	0.805434	0.810312	0.805969	0.80325	0.806146	0.992666	0.808185	0.797955	0.806657	0.806784	0.797898	0.806588	0.806892	0.807081	0.806941	0.806917	0.808446	0.806879	0.807039	0.806621	0.807055	0.946422	0.805756	0.797961	0.797933	0.797938	0.798015	0.7979	0.797837	0.795481	0.795694	0.806947	0.805717	0.805976	0.805972	0.805973	0.806897	0.805105	0.805458	0.805904	0.811784	0.813426	0.807098	0.80556
GCA0009650751ASM96507v1	0.921653	0.988693	0.86291	0.917848	0.807734	0.878521	0.965301	0.980668	0.903834	0.980798	0.808091	0.985194	0.867107	0.989392	0.989924	0.867067	0.973779	0.98939	0.990437	0.989568	0.989447	0.922018	0.988572	0.988575	0.982936	0.987608	0.810315	0.909328	0.867092	0.867099	0.867108	0.867101	0.867103	0.867156	0.862908	0.862939	0.974385	0.980603	0.980591	0.980639	0.980593	0.966015	0.879535	0.98113	0.980853	0.980573	0.963816	0.968026	0.909069
GCA0009651451ASM96514v1	0.920596	0.98871	0.864063	0.91739	0.808182	0.878072	0.964693	0.979965	0.901948	0.980341	0.808537	0.984811	0.868143	0.98885	0.98952	0.868079	0.973004	0.98894	0.990104	0.989307	0.989004	0.920693	0.988477	0.988459	0.982402	0.987444	0.810079	0.909029	0.868299	0.868114	0.868127	0.86832	0.867812	0.867821	0.864058	0.86407	0.973516	0.980045	0.980152	0.980049	0.980022	0.965024	0.879143	0.980547	0.980455	0.979764	0.963583	0.9664	0.908435
GCA0009651851ASM96518v1	0.920594	0.972551	0.865832	0.916965	0.814946	0.880808	0.961441	0.969556	0.904158	0.96984	0.814642	0.973498	0.869191	0.971098	0.971679	0.869145	0.992812	0.975856	0.97229	0.971811	0.975888	0.919433	0.972212	0.972575	0.973161	0.971509	0.811737	0.909767	0.869378	0.869172	0.86918	0.869351	0.869184	0.869139	0.865856	0.865859	0.990129	0.969501	0.969621	0.969658	0.96959	0.964153	0.881188	0.970154	0.96992	0.967884	0.958986	0.965617	0.910967
GCA0010513251Rickettsiaaeschlimannii	0.922097	0.963642	0.863205	0.916519	0.808535	0.880067	0.96815	0.960046	0.904109	0.960297	0.808503	0.964407	0.867934	0.961658	0.962698	0.867815	0.963738	0.966083	0.96293	0.962325	0.966059	0.922492	0.963331	0.963991	0.963505	0.962831	0.808847	0.908531	0.86796	0.867852	0.8679	0.867861	0.86776	0.867926	0.863281	0.863286	0.964496	0.960035	0.960038	0.959944	0.960022	0.967322	0.879511	0.960907	0.960333	0.960509	0.963109	0.968641	0.908321
GCA0012737951ASM127379v1	0.91866	0.963569	0.865842	0.917126	0.808372	0.879789	0.963478	0.96126	0.90565	0.961604	0.808869	0.963959	0.868012	0.961368	0.963362	0.867997	0.9644	0.966838	0.963975	0.963894	0.966946	0.922384	0.963343	0.963704	0.964789	0.962778	0.809911	0.910461	0.868025	0.868006	0.868017	0.868108	0.868181	0.868215	0.865712	0.865722	0.964636	0.961391	0.961533	0.961526	0.961482	0.966247	0.881155	0.962225	0.96186	0.960108	0.994858	0.966015	0.909857
GCA0014424751ASM144247v1	0.920493	0.96678	0.866115	0.915469	0.816001	0.878131	0.977307	0.963639	0.905277	0.963813	0.816365	0.965296	0.86898	0.964367	0.966451	0.869132	0.966198	0.969162	0.966766	0.966324	0.969228	0.921051	0.966921	0.966933	0.967252	0.966296	0.81223	0.910321	0.868997	0.869119	0.868981	0.868953	0.869016	0.86895	0.866171	0.866202	0.967428	0.963533	0.963719	0.963714	0.963705	0.98153	0.878867	0.964527	0.963908	0.962891	0.962339	0.99295	0.910834
GCA0016022151ASM160221v1	0.870523	0.866662	0.912456	0.867048	0.796941	0.85022	0.867322	0.865962	0.862379	0.866027	0.797231	0.867549	0.999935	0.86623	0.867406	0.999549	0.867268	0.867397	0.867572	0.867172	0.867531	0.868738	0.866783	0.866719	0.867126	0.86719	0.796736	0.865852	0.999833	0.999588	0.999594	0.999809	0.998739	0.998777	0.912433	0.912327	0.867568	0.865663	0.865771	0.865871	0.865769	0.867213	0.850064	0.866112	0.865939	0.866024	0.86658	0.868632	0.865957
GCA0016026351ASM160263v1	0.918809	0.976606	0.86231	0.913383	0.805275	0.87916	0.960494	0.979816	0.900095	0.980306	0.805528	0.98139	0.865371	0.976191	0.976734	0.865306	0.967067	0.979824	0.977118	0.976715	0.979821	0.921235	0.976567	0.976588	0.975995	0.975383	0.809516	0.906541	0.865358	0.865351	0.865349	0.865455	0.86527	0.865385	0.862171	0.862059	0.96779	0.979996	0.979943	0.979941	0.979891	0.960251	0.878735	0.981012	0.98033	0.981424	0.959084	0.961293	0.906234
Gbili3	0.717398	0.717371	0.717412	0.717894	0.714768	0.716842	0.717346	0.716888	0.716165	0.717026	0.714357	0.717917	0.71741	0.71643	0.716204	0.717389	0.716833	0.717043	0.71661	0.717125	0.717053	0.716479	0.7171	0.717668	0.716902	0.717271	0.716827	0.717416	0.71741	0.717401	0.717421	0.717415	0.717246	0.717352	0.717409	0.717413	0.716913	0.717048	0.716865	0.716892	0.716882	0.715992	0.717429	0.716081	0.716919	0.716604	0.715638	0.715991	0.717245
Gdoso1	0.811991	0.807954	0.796981	0.810874	0.946918	0.806813	0.808467	0.807105	0.804266	0.807441	0.946613	0.808677	0.798807	0.808129	0.807976	0.798763	0.808005	0.808063	0.808183	0.808538	0.808254	0.81005	0.808126	0.808844	0.808454	0.808142	0.974199	0.806295	0.798811	0.798798	0.79881	0.798846	0.798758	0.798763	0.79698	0.797186	0.80877	0.806658	0.806943	0.807108	0.807035	0.809603	0.806481	0.806876	0.807457	0.806724	0.807987	0.809158	0.806068
Lappe3	0.720238	0.719455	0.721464	0.721434	0.721248	0.721319	0.723604	0.719734	0.720825	0.719826	0.720926	0.719941	0.722755	0.718833	0.719384	0.722622	0.720151	0.719191	0.720102	0.719611	0.719198	0.720786	0.71938	0.720033	0.719105	0.719506	0.722162	0.71972	0.722769	0.722636	0.722612	0.722758	0.722664	0.722725	0.721464	0.721464	0.720541	0.71993	0.719788	0.719737	0.719813	0.72008	0.721242	0.71943	0.719904	0.720657	0.720377	0.719599	0.720207
Lappe4	0.718798	0.719286	0.718984	0.717922	0.715766	0.718798	0.718696	0.718487	0.716272	0.718448	0.715866	0.718175	0.718863	0.718939	0.718787	0.718843	0.718262	0.718826	0.718883	0.718777	0.718839	0.717656	0.718692	0.719159	0.718873	0.719129	0.716393	0.716005	0.718869	0.718861	0.71887	0.718858	0.719059	0.719053	0.718984	0.718988	0.718555	0.718646	0.71847	0.718491	0.718484	0.719445	0.719096	0.718634	0.718363	0.719074	0.719642	0.718668	0.71559
MegCarteria	0.701309	0.699718	0.699498	0.701026	0.701359	0.699946	0.7006	0.699774	0.699782	0.699772	0.701486	0.700133	0.701168	0.699328	0.699852	0.701194	0.699986	0.699838	0.69947	0.698452	0.699849	0.700267	0.700017	0.699933	0.699882	0.699357	0.700816	0.701354	0.701137	0.701179	0.701203	0.701135	0.701096	0.701084	0.699494	0.699498	0.700325	0.699292	0.699723	0.699768	0.699731	0.699241	0.699696	0.698784	0.699921	0.699378	0.699319	0.700347	0.700833
MegNEIS296	0.698233	0.698053	0.697769	0.69877	0.699323	0.699987	0.699602	0.698809	0.697995	0.698808	0.698487	0.698547	0.698337	0.697996	0.698509	0.698307	0.698634	0.698025	0.69872	0.698182	0.698032	0.698993	0.698193	0.698008	0.698593	0.697928	0.698321	0.696596	0.698322	0.698306	0.698334	0.698302	0.698423	0.69821	0.697775	0.697783	0.698881	0.698971	0.698782	0.698804	0.698809	0.698322	0.699919	0.698464	0.698598	0.698219	0.697921	0.698236	0.696273
Moomin	0.725453	0.718134	0.720359	0.719001	0.718464	0.720772	0.718992	0.718193	0.718202	0.71818	0.718168	0.718239	0.720397	0.717334	0.718568	0.720361	0.71825	0.718149	0.71799	0.71842	0.718158	0.718792	0.718165	0.71847	0.718076	0.718441	0.720129	0.718611	0.720596	0.72036	0.720398	0.720772	0.720482	0.720497	0.720217	0.720216	0.717769	0.718158	0.718176	0.718189	0.718216	0.717946	0.720945	0.718581	0.718151	0.718354	0.718924	0.716652	0.71864
Ofont3	0.895867	0.890987	0.851142	0.891728	0.807829	0.875831	0.891189	0.889945	0.880751	0.89033	0.808296	0.890838	0.853909	0.891398	0.891248	0.853938	0.891436	0.892251	0.892625	0.892468	0.89224	0.895088	0.891474	0.891848	0.892033	0.890541	0.811953	0.886632	0.853897	0.853865	0.85387	0.853889	0.853841	0.853915	0.851113	0.851363	0.892487	0.890121	0.889888	0.889833	0.889889	0.892844	0.876542	0.889963	0.89036	0.888834	0.890438	0.89267	0.886042
Oopac6	0.76893	0.762653	0.754408	0.766944	0.762958	0.762437	0.76951	0.761264	0.759216	0.761787	0.763124	0.76823	0.755697	0.765708	0.762626	0.75587	0.762593	0.762756	0.763005	0.763514	0.762771	0.769642	0.76421	0.763705	0.763228	0.76386	0.757545	0.762617	0.755709	0.755899	0.755679	0.755701	0.755618	0.755613	0.754413	0.754417	0.762433	0.761253	0.761253	0.761268	0.761248	0.762797	0.760899	0.76174	0.761809	0.767245	0.770632	0.7662	0.761304
Orientia	0.694623	0.696069	0.69731	0.696735	0.698348	0.690664	0.696639	0.697018	0.696183	0.696777	0.698078	0.695416	0.696853	0.697613	0.697013	0.696686	0.69778	0.69688	0.696611	0.697269	0.696897	0.69762	0.696872	0.69726	0.697242	0.69752	0.697424	0.695033	0.696861	0.696663	0.696741	0.696854	0.69639	0.696332	0.69731	0.697301	0.697121	0.696759	0.696992	0.69703	0.697018	0.695878	0.696665	0.696817	0.696707	0.699427	0.694172	0.6968	0.695042
Pante1	0.721788	0.722144	0.722622	0.721105	0.722485	0.719727	0.724748	0.720943	0.720178	0.721318	0.721784	0.721387	0.723059	0.72161	0.7228	0.723017	0.721942	0.722195	0.723281	0.722818	0.722193	0.718569	0.723305	0.723044	0.72144	0.722944	0.722888	0.720279	0.72305	0.723026	0.723059	0.723094	0.723183	0.723218	0.722619	0.722618	0.722027	0.721161	0.721196	0.721114	0.721197	0.7212	0.720386	0.721543	0.72114	0.720658	0.721721	0.720178	0.720427
Pfluc4	0.918587	0.977872	0.86335	0.914523	0.806217	0.877178	0.961792	0.981031	0.901181	0.981513	0.806587	0.982617	0.86661	0.977041	0.977671	0.86659	0.967841	0.980864	0.978026	0.977678	0.98087	0.920214	0.977797	0.97796	0.976639	0.976898	0.809132	0.907258	0.866593	0.866589	0.866604	0.866575	0.866498	0.866507	0.863341	0.863348	0.96827	0.981051	0.981185	0.981094	0.981128	0.960457	0.877429	0.981693	0.981513	0.98238	0.959709	0.961935	0.907391
Ppec13	0.812019	0.80617	0.789944	0.808907	0.803712	0.80135	0.805671	0.804983	0.802429	0.805285	0.804063	0.806224	0.791764	0.805785	0.806219	0.791727	0.805843	0.807024	0.8064	0.806074	0.807035	0.807356	0.80691	0.806387	0.806398	0.806195	0.806747	0.803979	0.791757	0.791753	0.791769	0.791739	0.791534	0.791589	0.789972	0.789973	0.80618	0.804878	0.804921	0.804981	0.804929	0.80594	0.802233	0.804245	0.805274	0.805464	0.806637	0.8062	0.803508
Psono2	0.71921	0.717778	0.720345	0.718496	0.717524	0.717918	0.717165	0.717608	0.717247	0.717297	0.717546	0.71615	0.719096	0.716793	0.717652	0.71907	0.717466	0.717371	0.717707	0.717748	0.717373	0.717641	0.71765	0.718114	0.717542	0.717788	0.717261	0.71781	0.719098	0.719087	0.719102	0.719114	0.719089	0.719135	0.720338	0.720341	0.717534	0.717434	0.717531	0.717608	0.717553	0.718171	0.718013	0.717936	0.717657	0.718915	0.71828	0.717007	0.717537
RiAbipunctata	0.898858	0.894265	0.849294	0.896367	0.813509	0.878949	0.8971	0.893398	0.882761	0.893326	0.813532	0.894969	0.850999	0.893725	0.89322	0.850949	0.894409	0.895011	0.893964	0.893769	0.89502	0.899138	0.893996	0.894574	0.89467	0.893975	0.813712	0.889251	0.851215	0.850984	0.85101	0.851255	0.851065	0.851007	0.849185	0.84917	0.894381	0.893216	0.893371	0.893349	0.89329	0.896094	0.879012	0.893233	0.893276	0.893489	0.893782	0.896804	0.888807
RiCNE	0.720866	0.720873	0.721491	0.720787	0.721617	0.719748	0.72185	0.720022	0.719215	0.720223	0.722276	0.720273	0.721398	0.720161	0.721392	0.721342	0.720151	0.720841	0.720868	0.720634	0.720847	0.719972	0.720416	0.721111	0.720135	0.720823	0.722121	0.719276	0.721372	0.721354	0.721358	0.721374	0.72133	0.721395	0.721488	0.721486	0.720394	0.720233	0.720002	0.720025	0.720019	0.72033	0.720407	0.721064	0.720149	0.720794	0.721355	0.719726	0.719081
RiCimp	0.720826	0.719688	0.720824	0.719285	0.720711	0.719146	0.721327	0.718603	0.719603	0.718366	0.721151	0.719923	0.721727	0.718763	0.719417	0.721698	0.719006	0.719417	0.720084	0.719588	0.719425	0.717033	0.719989	0.719908	0.718835	0.719636	0.719704	0.719021	0.721722	0.721718	0.721654	0.721722	0.721635	0.721703	0.720829	0.720825	0.718896	0.718291	0.718534	0.718599	0.718543	0.719241	0.719659	0.718807	0.718271	0.719978	0.71919	0.718207	0.719192
RiClec	0.717872	0.718694	0.719201	0.718571	0.71922	0.718644	0.717447	0.7182	0.717784	0.718208	0.718943	0.718139	0.719888	0.718385	0.719271	0.719868	0.7182	0.718501	0.719374	0.719193	0.718503	0.718639	0.718755	0.718932	0.719165	0.719523	0.717403	0.717459	0.71988	0.719874	0.719888	0.720105	0.719788	0.719843	0.719161	0.719161	0.718084	0.718052	0.718292	0.7182	0.718298	0.717183	0.718726	0.719378	0.718104	0.718134	0.716503	0.716689	0.717573
RiTBt	0.721916	0.719613	0.723637	0.726107	0.721319	0.721663	0.724146	0.719523	0.720348	0.719997	0.72098	0.723373	0.72316	0.718944	0.71935	0.723112	0.720602	0.719962	0.719156	0.719095	0.719973	0.720467	0.719533	0.71988	0.719355	0.720244	0.722242	0.723164	0.723278	0.723128	0.723175	0.723268	0.723112	0.723206	0.723644	0.723635	0.720854	0.719737	0.719508	0.719524	0.719357	0.72021	0.721296	0.719744	0.71993	0.719147	0.721376	0.720439	0.720573
RiTSETSE	0.948951	0.914446	0.859617	0.954898	0.80858	0.879376	0.914114	0.912409	0.913759	0.912696	0.808046	0.9144	0.862985	0.912999	0.913812	0.863134	0.913231	0.914907	0.914368	0.914912	0.914888	0.915575	0.914482	0.913926	0.915303	0.913749	0.810674	0.918943	0.863003	0.863172	0.863188	0.863043	0.86328	0.863156	0.859621	0.859521	0.913789	0.912345	0.912501	0.912417	0.912467	0.913847	0.878923	0.913457	0.912658	0.913001	0.910561	0.913898	0.919343
S2	0.71952	0.717297	0.71868	0.718396	0.717865	0.717166	0.717725	0.717435	0.716686	0.717426	0.71744	0.717166	0.719079	0.716856	0.717442	0.719049	0.717564	0.717905	0.717473	0.717645	0.717916	0.718401	0.71753	0.717883	0.717121	0.717674	0.718825	0.717159	0.719064	0.719056	0.719105	0.719061	0.719032	0.719027	0.718677	0.718677	0.717581	0.717483	0.717405	0.717448	0.717438	0.717117	0.717203	0.717836	0.717417	0.718204	0.718045	0.716627	0.717112
Sanch3	0.813432	0.805695	0.793726	0.810231	0.960534	0.805553	0.805833	0.804084	0.802401	0.804382	0.960266	0.806389	0.796412	0.8051	0.805847	0.79638	0.805519	0.805624	0.806158	0.806282	0.805642	0.809072	0.806057	0.805542	0.806259	0.805714	0.945407	0.805315	0.796439	0.796416	0.796417	0.796451	0.796361	0.796329	0.793724	0.793719	0.805318	0.80377	0.804029	0.80411	0.804103	0.806609	0.80571	0.804411	0.804398	0.805393	0.80696	0.807303	0.805004
Slati1	0.963134	0.9207	0.865606	0.955045	0.810957	0.882884	0.923269	0.919203	0.917979	0.919663	0.811393	0.921341	0.869596	0.92031	0.920911	0.869625	0.920744	0.922868	0.921019	0.921276	0.922873	0.923849	0.921012	0.921311	0.921204	0.920815	0.813371	0.925116	0.869621	0.86967	0.869656	0.869678	0.869674	0.869691	0.865462	0.865487	0.921569	0.919378	0.919378	0.91923	0.919293	0.921466	0.882366	0.919641	0.91955	0.919529	0.921385	0.923364	0.925223
Ssp4	0.720465	0.718872	0.720159	0.720642	0.719178	0.71898	0.718621	0.719036	0.718698	0.718525	0.719572	0.718595	0.720356	0.718499	0.719071	0.720352	0.717656	0.718788	0.718944	0.718945	0.718804	0.719436	0.719131	0.719268	0.718464	0.719672	0.720629	0.718757	0.720344	0.720363	0.720372	0.720348	0.720363	0.720347	0.720158	0.720154	0.718532	0.718903	0.719143	0.719172	0.719157	0.718126	0.719433	0.71932	0.718778	0.719657	0.719472	0.717337	0.718692
[truncated: 55 more columns]

## Sheet: Fig 2b. AAI scores
Average Amino acid Identity (AAI) scores between all genomes.
SeqA	SeqB	AAI	SD	N	Omega	Frx			Key
62_GCA_000964905.1_ASM96490v1	59_GCA_000283855.1_ASM28385v1	99.9991	0.0222395	1402	1419	98.802			SeqA	ID of the first genome.
47_GCA_000284195.1_ASM28419v1	48_GCA_000965145.1_ASM96514v1	99.9977	0.0662247	1432	1440	99.4444			SeqB	ID of the second genome.
48_GCA_000965145.1_ASM96514v1	47_GCA_000284195.1_ASM28419v1	99.9967	0.105252	1432	1440	99.4444			ANI/AAI	Value of ANI or AAI (%).
71_GCA_000283835.1_ASM28383v1	69_GCA_000831545.1_ASM83154v1	99.9946	0.0989676	1415	1416	99.9294			SD	Standard deviation of identity (%) between reciprocal best matching fragments (ANI) or proteins (AAI).
90_GCA_000022785.1_ASM2278v1	92_GCA_000385495.1	99.9939	0.0589481	879	881	99.773			N	Number of reciprocal best matches found.
92_GCA_000385495.1	90_GCA_000022785.1_ASM2278v1	99.9939	0.0589481	879	881	99.773			Omega	Minimum number of fragments (ANI) or proteins (AAI) between the two genomes. This is the maximum possible number that N can take.
92_GCA_000385495.1	88_GCA_001602215.1_ASM160221v1	99.9938	0.0593817	879	882	99.6599			Frx	N/Omega ratio (%); the percentage of the genome shared.
88_GCA_001602215.1_ASM160221v1	92_GCA_000385495.1	99.9938	0.0593817	879	882	99.6599
11_GCA_000964665.1_ASM96466v1	5_GCA_000012145.1_ASM1214v1	99.9935	0.106186	1453	1500	96.8667
5_GCA_000012145.1_ASM1214v1	11_GCA_000964665.1_ASM96466v1	99.9935	0.106186	1453	1500	96.8667
76_GCA_000831525.1_ASM83152v1	75_GCA_000018225.1_ASM1822v1	99.993	0.182839	1395	1396	99.9284
101_GCA_000277285.1_ASM27728v1	103_GCA_000008045.1_ASM804v1	99.9906	0.155712	868	870	99.7701
71_GCA_000283835.1_ASM28383v1	70_GCA_000283815.1_ASM28381v1	99.9874	0.125062	1413	1415	99.8587
49_GCA_000965075.1_ASM96507v1	48_GCA_000965145.1_ASM96514v1	99.9865	0.177946	1430	1440	99.3056
48_GCA_000965145.1_ASM96514v1	49_GCA_000965075.1_ASM96507v1	99.9865	0.177946	1430	1440	99.3056
47_GCA_000284195.1_ASM28419v1	49_GCA_000965075.1_ASM96507v1	99.9858	0.18945	1436	1440	99.7222
49_GCA_000965075.1_ASM96507v1	47_GCA_000284195.1_ASM28419v1	99.9858	0.18945	1436	1440	99.7222
72_GCA_000017445.3_ASM1744v3	70_GCA_000283815.1_ASM28381v1	99.9857	0.253876	1414	1415	99.9293
70_GCA_000283815.1_ASM28381v1	72_GCA_000017445.3_ASM1744v3	99.9857	0.253876	1414	1415	99.9293
70_GCA_000283815.1_ASM28381v1	69_GCA_000831545.1_ASM83154v1	99.985	0.150183	1414	1415	99.9293
90_GCA_000022785.1_ASM2278v1	95_GCA_000277165.1_ASM27716v1	99.9849	0.107193	880	881	99.8865
92_GCA_000385495.1	95_GCA_000277165.1_ASM27716v1	99.9828	0.116882	880	882	99.7732
95_GCA_000277165.1_ASM27716v1	92_GCA_000385495.1	99.9828	0.116882	880	882	99.7732
72_GCA_000017445.3_ASM1744v3	69_GCA_000831545.1_ASM83154v1	99.9821	0.250821	1414	1417	99.7883
90_GCA_000022785.1_ASM2278v1	88_GCA_001602215.1_ASM160221v1	99.9816	0.42536	881	881	100
88_GCA_001602215.1_ASM160221v1	90_GCA_000022785.1_ASM2278v1	99.9816	0.42536	881	881	100
94_GCA_000277205.1_ASM27720v1	91_GCA_000277185.1_ASM27718v1	99.9813	0.107022	879	880	99.8864
71_GCA_000283835.1_ASM28383v1	72_GCA_000017445.3_ASM1744v3	99.9806	0.260093	1413	1416	99.7881
72_GCA_000017445.3_ASM1744v3	71_GCA_000283835.1_ASM28383v1	99.9806	0.260093	1413	1416	99.7881
51_GCA_000284155.1_ASM28415v1	50_GCA_000273745.1_Rau1.0	99.9806	0.22056	1394	1438	96.9402
103_GCA_000008045.1_ASM804v1	101_GCA_000277285.1_ASM27728v1	99.9806	0.447624	868	870	99.7701
101_GCA_000277285.1_ASM27728v1	100_GCA_000277305.1_ASM27730v1	99.9791	0.448564	869	870	99.8851
89_GCA_000195735.1_ASM19573v1	91_GCA_000277185.1_ASM27718v1	99.9788	0.236883	882	883	99.8867
53_GCA_000283595.1_ASM28359v1	57_GCA_000302635.2_ASM30263v2	99.9787	0.234863	1415	1430	98.951
97_GCA_000277225.1_ASM27722v1	95_GCA_000277165.1_ASM27716v1	99.9785	0.318771	880	882	99.7732
95_GCA_000277165.1_ASM27716v1	97_GCA_000277225.1_ASM27722v1	99.9785	0.318771	880	882	99.7732
54_GCA_000252365.1_ASM25236v1	56_GCA_000237845.1_ASM23784v1	99.9776	0.501095	1437	1441	99.7224
71_GCA_000283835.1_ASM28383v1	73_GCA_000283795.1_ASM28379v1	99.9761	0.270845	1410	1414	99.7171
91_GCA_000277185.1_ASM27718v1	89_GCA_000195735.1_ASM19573v1	99.976	0.300692	882	883	99.8867
56_GCA_000237845.1_ASM23784v1	54_GCA_000252365.1_ASM25236v1	99.9749	0.540266	1437	1441	99.7224
94_GCA_000277205.1_ASM27720v1	90_GCA_000022785.1_ASM2278v1	99.9742	0.12333	878	880	99.7727
73_GCA_000283795.1_ASM28379v1	69_GCA_000831545.1_ASM83154v1	99.9738	0.281699	1410	1414	99.7171
69_GCA_000831545.1_ASM83154v1	73_GCA_000283795.1_ASM28379v1	99.9737	0.283271	1410	1414	99.7171
90_GCA_000022785.1_ASM2278v1	91_GCA_000277185.1_ASM27718v1	99.9722	0.124259	880	881	99.8865
91_GCA_000277185.1_ASM27718v1	90_GCA_000022785.1_ASM2278v1	99.9722	0.124259	880	881	99.8865
70_GCA_000283815.1_ASM28381v1	73_GCA_000283795.1_ASM28379v1	99.9722	0.28204	1410	1414	99.7171
92_GCA_000385495.1	97_GCA_000277225.1_ASM27722v1	99.9721	0.169376	878	890	98.6517
97_GCA_000277225.1_ASM27722v1	92_GCA_000385495.1	99.9721	0.169376	878	890	98.6517
100_GCA_000277305.1_ASM27730v1	103_GCA_000008045.1_ASM804v1	99.972	0.473865	868	870	99.7701
81_SRR5308138_Pfluc4	79_GCA_001602635.1_ASM160263v1	99.9716	0.27557	1394	1400	99.5714
79_GCA_001602635.1_ASM160263v1	81_SRR5308138_Pfluc4	99.9716	0.27557	1394	1400	99.5714
94_GCA_000277205.1_ASM27720v1	92_GCA_000385495.1	99.9716	0.143116	877	880	99.6591
94_GCA_000277205.1_ASM27720v1	95_GCA_000277165.1_ASM27716v1	99.9705	0.136792	878	880	99.7727
95_GCA_000277165.1_ASM27716v1	94_GCA_000277205.1_ASM27720v1	99.9705	0.136792	878	880	99.7727
88_GCA_001602215.1_ASM160221v1	95_GCA_000277165.1_ASM27716v1	99.9705	0.436706	880	882	99.7732
92_GCA_000385495.1	91_GCA_000277185.1_ASM27718v1	99.9692	0.144001	879	883	99.547
91_GCA_000277185.1_ASM27718v1	92_GCA_000385495.1	99.9692	0.144001	879	883	99.547
91_GCA_000277185.1_ASM27718v1	95_GCA_000277165.1_ASM27716v1	99.9676	0.146312	879	882	99.6599
96_GCA_000277245.1_ASM27724v1	93_GCA_000277265.1_ASM27726v1	99.9672	0.143775	876	880	99.5455
93_GCA_000277265.1_ASM27726v1	96_GCA_000277245.1_ASM27724v1	99.9672	0.143775	876	880	99.5455
95_GCA_000277165.1_ASM27716v1	98_GCA_000367405.1_ASM36740v1	99.967	0.130532	879	882	99.6599
98_GCA_000367405.1_ASM36740v1	95_GCA_000277165.1_ASM27716v1	99.967	0.130532	879	882	99.6599
72_GCA_000017445.3_ASM1744v3	73_GCA_000283795.1_ASM28379v1	99.9641	0.414569	1410	1414	99.7171
94_GCA_000277205.1_ASM27720v1	89_GCA_000195735.1_ASM19573v1	99.9637	0.320209	879	880	99.8864
97_GCA_000277225.1_ASM27722v1	90_GCA_000022785.1_ASM2278v1	99.9634	0.345434	878	881	99.6595
90_GCA_000022785.1_ASM2278v1	97_GCA_000277225.1_ASM27722v1	99.9634	0.345434	878	881	99.6595
92_GCA_000385495.1	89_GCA_000195735.1_ASM19573v1	99.9598	0.226833	879	896	98.1027
89_GCA_000195735.1_ASM19573v1	92_GCA_000385495.1	99.9598	0.226833	879	896	98.1027
88_GCA_001602215.1_ASM160221v1	94_GCA_000277205.1_ASM27720v1	99.9598	0.441215	878	880	99.7727
94_GCA_000277205.1_ASM27720v1	88_GCA_001602215.1_ASM160221v1	99.9598	0.441215	878	880	99.7727
91_GCA_000277185.1_ASM27718v1	88_GCA_001602215.1_ASM160221v1	99.9569	0.444043	880	882	99.7732
88_GCA_001602215.1_ASM160221v1	91_GCA_000277185.1_ASM27718v1	99.9569	0.444043	880	882	99.7732
89_GCA_000195735.1_ASM19573v1	90_GCA_000022785.1_ASM2278v1	99.9561	0.272467	881	881	100
92_GCA_000385495.1	98_GCA_000367405.1_ASM36740v1	99.9558	0.15413	880	897	98.1048
88_GCA_001602215.1_ASM160221v1	89_GCA_000195735.1_ASM19573v1	99.9553	0.27255	881	882	99.8866
90_GCA_000022785.1_ASM2278v1	98_GCA_000367405.1_ASM36740v1	99.9543	0.157927	877	881	99.546
88_GCA_001602215.1_ASM160221v1	98_GCA_000367405.1_ASM36740v1	99.9542	0.157732	877	882	99.4331
89_GCA_000195735.1_ASM19573v1	95_GCA_000277165.1_ASM27716v1	99.9534	0.277967	880	882	99.7732
90_GCA_000022785.1_ASM2278v1	89_GCA_000195735.1_ASM19573v1	99.9533	0.329322	881	881	100
89_GCA_000195735.1_ASM19573v1	88_GCA_001602215.1_ASM160221v1	99.9527	0.324582	881	882	99.8866
94_GCA_000277205.1_ASM27720v1	97_GCA_000277225.1_ASM27722v1	99.9512	0.344143	876	880	99.5455
97_GCA_000277225.1_ASM27722v1	94_GCA_000277205.1_ASM27720v1	99.9512	0.344143	876	880	99.5455
88_GCA_001602215.1_ASM160221v1	97_GCA_000277225.1_ASM27722v1	99.949	0.546404	878	882	99.5465
97_GCA_000277225.1_ASM27722v1	88_GCA_001602215.1_ASM160221v1	99.949	0.546404	878	882	99.5465
97_GCA_000277225.1_ASM27722v1	98_GCA_000367405.1_ASM36740v1	99.9481	0.349794	877	890	98.5393
98_GCA_000367405.1_ASM36740v1	97_GCA_000277225.1_ASM27722v1	99.9481	0.349794	877	890	98.5393
97_GCA_000277225.1_ASM27722v1	91_GCA_000277185.1_ASM27718v1	99.9474	0.359316	877	883	99.3205
91_GCA_000277185.1_ASM27718v1	97_GCA_000277225.1_ASM27722v1	99.9474	0.359316	877	883	99.3205
94_GCA_000277205.1_ASM27720v1	98_GCA_000367405.1_ASM36740v1	99.9381	0.197433	877	880	99.6591
98_GCA_000367405.1_ASM36740v1	94_GCA_000277205.1_ASM27720v1	99.9381	0.197433	877	880	99.6591
91_GCA_000277185.1_ASM27718v1	98_GCA_000367405.1_ASM36740v1	99.937	0.190261	878	883	99.4337
89_GCA_000195735.1_ASM19573v1	97_GCA_000277225.1_ASM27722v1	99.9331	0.429469	878	890	98.6517
89_GCA_000195735.1_ASM19573v1	98_GCA_000367405.1_ASM36740v1	99.9303	0.252208	877	896	97.8795
97_GCA_000277225.1_ASM27722v1	89_GCA_000195735.1_ASM19573v1	99.9303	0.467596	878	890	98.6517
93_GCA_000277265.1_ASM27726v1	102_GCA_000385475.1	99.9291	0.49256	877	880	99.6591
77_GCA_000283955.1_ASM28395v1	76_GCA_000831525.1_ASM83152v1	99.9166	0.418464	1382	1396	98.9971
77_GCA_000283955.1_ASM28395v1	75_GCA_000018225.1_ASM1822v1	99.9162	0.413044	1382	1396	98.9971
99_GCA_000363905.1_ASM36390v1	89_GCA_000195735.1_ASM19573v1	99.9122	0.320675	885	896	98.7723
99_GCA_000363905.1_ASM36390v1	91_GCA_000277185.1_ASM27718v1	99.9048	0.370132	881	883	99.7735
102_GCA_000385475.1	96_GCA_000277245.1_ASM27724v1	99.9009	0.504258	878	884	99.3213
99_GCA_000363905.1_ASM36390v1	94_GCA_000277205.1_ASM27720v1	99.8993	0.37442	877	880	99.6591
94_GCA_000277205.1_ASM27720v1	99_GCA_000363905.1_ASM36390v1	99.8979	0.401796	877	880	99.6591
99_GCA_000363905.1_ASM36390v1	92_GCA_000385495.1	99.8972	0.302135	878	897	97.8818
75_GCA_000018225.1_ASM1822v1	68_GCA_000283775.1_ASM28377v1	99.8937	0.867481	1383	1396	99.0688
68_GCA_000283775.1_ASM28377v1	75_GCA_000018225.1_ASM1822v1	99.8937	0.867481	1383	1396	99.0688
77_GCA_000283955.1_ASM28395v1	68_GCA_000283775.1_ASM28377v1	99.8925	0.877861	1381	1396	98.9255
68_GCA_000283775.1_ASM28377v1	76_GCA_000831525.1_ASM83152v1	99.8899	0.883254	1383	1396	99.0688
76_GCA_000831525.1_ASM83152v1	68_GCA_000283775.1_ASM28377v1	99.8899	0.883254	1383	1396	99.0688
99_GCA_000363905.1_ASM36390v1	90_GCA_000022785.1_ASM2278v1	99.8845	0.388329	878	881	99.6595
99_GCA_000363905.1_ASM36390v1	95_GCA_000277165.1_ASM27716v1	99.8819	0.391171	877	882	99.4331
71_GCA_000283835.1_ASM28383v1	75_GCA_000018225.1_ASM1822v1	99.8816	0.451795	1383	1396	99.0688
75_GCA_000018225.1_ASM1822v1	71_GCA_000283835.1_ASM28383v1	99.8815	0.4521	1383	1396	99.0688
75_GCA_000018225.1_ASM1822v1	69_GCA_000831545.1_ASM83154v1	99.8814	0.453327	1383	1396	99.0688
69_GCA_000831545.1_ASM83154v1	75_GCA_000018225.1_ASM1822v1	99.8813	0.453864	1383	1396	99.0688
99_GCA_000363905.1_ASM36390v1	98_GCA_000367405.1_ASM36740v1	99.8807	0.313372	884	897	98.5507
98_GCA_000367405.1_ASM36740v1	99_GCA_000363905.1_ASM36390v1	99.8807	0.313372	884	897	98.5507
99_GCA_000363905.1_ASM36390v1	88_GCA_001602215.1_ASM160221v1	99.8807	0.443504	878	882	99.5465
95_GCA_000277165.1_ASM27716v1	99_GCA_000363905.1_ASM36390v1	99.8805	0.417391	877	882	99.4331
73_GCA_000283795.1_ASM28379v1	75_GCA_000018225.1_ASM1822v1	99.8799	0.499899	1381	1396	98.9255
75_GCA_000018225.1_ASM1822v1	73_GCA_000283795.1_ASM28379v1	99.8799	0.499899	1381	1396	98.9255
70_GCA_000283815.1_ASM28381v1	75_GCA_000018225.1_ASM1822v1	99.8791	0.455534	1383	1396	99.0688
75_GCA_000018225.1_ASM1822v1	70_GCA_000283815.1_ASM28381v1	99.879	0.455837	1383	1396	99.0688
72_GCA_000017445.3_ASM1744v3	76_GCA_000831525.1_ASM83152v1	99.8782	0.474097	1383	1396	99.0688
71_GCA_000283835.1_ASM28383v1	76_GCA_000831525.1_ASM83152v1	99.8782	0.482871	1383	1396	99.0688
76_GCA_000831525.1_ASM83152v1	69_GCA_000831545.1_ASM83154v1	99.8778	0.485222	1383	1396	99.0688
76_GCA_000831525.1_ASM83152v1	73_GCA_000283795.1_ASM28379v1	99.8763	0.528326	1381	1396	98.9255
70_GCA_000283815.1_ASM28381v1	76_GCA_000831525.1_ASM83152v1	99.8752	0.490085	1383	1396	99.0688
76_GCA_000831525.1_ASM83152v1	70_GCA_000283815.1_ASM28381v1	99.8751	0.490366	1383	1396	99.0688
71_GCA_000283835.1_ASM28383v1	77_GCA_000283955.1_ASM28395v1	99.8751	0.498886	1380	1396	98.8539
77_GCA_000283955.1_ASM28395v1	71_GCA_000283835.1_ASM28383v1	99.875	0.499132	1380	1396	98.8539
77_GCA_000283955.1_ASM28395v1	69_GCA_000831545.1_ASM83154v1	99.8736	0.500332	1380	1396	98.8539
77_GCA_000283955.1_ASM28395v1	70_GCA_000283815.1_ASM28381v1	99.8734	0.511003	1380	1396	98.8539
75_GCA_000018225.1_ASM1822v1	72_GCA_000017445.3_ASM1744v3	99.8733	0.507089	1383	1396	99.0688
72_GCA_000017445.3_ASM1744v3	75_GCA_000018225.1_ASM1822v1	99.8732	0.507627	1383	1396	99.0688
72_GCA_000017445.3_ASM1744v3	77_GCA_000283955.1_ASM28395v1	99.8727	0.507797	1381	1396	98.9255
77_GCA_000283955.1_ASM28395v1	73_GCA_000283795.1_ASM28379v1	99.8717	0.542269	1379	1396	98.7822
88_GCA_001602215.1_ASM160221v1	93_GCA_000277265.1_ASM27726v1	99.8697	0.318504	874	880	99.3182
93_GCA_000277265.1_ASM27726v1	88_GCA_001602215.1_ASM160221v1	99.8697	0.318504	874	880	99.3182
93_GCA_000277265.1_ASM27726v1	92_GCA_000385495.1	99.8696	0.320079	873	880	99.2045
92_GCA_000385495.1	93_GCA_000277265.1_ASM27726v1	99.8696	0.320079	873	880	99.2045
71_GCA_000283835.1_ASM28383v1	68_GCA_000283775.1_ASM28377v1	99.8681	0.891466	1402	1413	99.2215
68_GCA_000283775.1_ASM28377v1	73_GCA_000283795.1_ASM28379v1	99.8677	0.900935	1399	1413	99.0092
68_GCA_000283775.1_ASM28377v1	69_GCA_000831545.1_ASM83154v1	99.8663	0.901746	1402	1413	99.2215
70_GCA_000283815.1_ASM28381v1	68_GCA_000283775.1_ASM28377v1	99.8656	0.893485	1400	1413	99.08
68_GCA_000283775.1_ASM28377v1	70_GCA_000283815.1_ASM28381v1	99.8656	0.893485	1400	1413	99.08
93_GCA_000277265.1_ASM27726v1	94_GCA_000277205.1_ASM27720v1	99.8648	0.44109	874	880	99.3182
93_GCA_000277265.1_ASM27726v1	91_GCA_000277185.1_ASM27718v1	99.864	0.437374	874	880	99.3182
99_GCA_000363905.1_ASM36390v1	97_GCA_000277225.1_ASM27722v1	99.8633	0.512165	876	890	98.427
72_GCA_000017445.3_ASM1744v3	68_GCA_000283775.1_ASM28377v1	99.8632	0.915304	1400	1413	99.08
68_GCA_000283775.1_ASM28377v1	72_GCA_000017445.3_ASM1744v3	99.8632	0.915304	1400	1413	99.08
97_GCA_000277225.1_ASM27722v1	99_GCA_000363905.1_ASM36390v1	99.8619	0.532433	876	890	98.427
96_GCA_000277245.1_ASM27724v1	95_GCA_000277165.1_ASM27716v1	99.8611	0.310741	872	882	98.8662
95_GCA_000277165.1_ASM27716v1	96_GCA_000277245.1_ASM27724v1	99.8611	0.310741	872	882	98.8662
94_GCA_000277205.1_ASM27720v1	93_GCA_000277265.1_ASM27726v1	99.8606	0.540951	874	880	99.3182
91_GCA_000277185.1_ASM27718v1	93_GCA_000277265.1_ASM27726v1	99.8597	0.537919	874	880	99.3182
93_GCA_000277265.1_ASM27726v1	90_GCA_000022785.1_ASM2278v1	99.8596	0.456784	874	880	99.3182
93_GCA_000277265.1_ASM27726v1	89_GCA_000195735.1_ASM19573v1	99.8585	0.38789	875	880	99.4318
94_GCA_000277205.1_ASM27720v1	96_GCA_000277245.1_ASM27724v1	99.8578	0.398953	872	880	99.0909
96_GCA_000277245.1_ASM27724v1	94_GCA_000277205.1_ASM27720v1	99.8578	0.398953	872	880	99.0909
93_GCA_000277265.1_ASM27726v1	95_GCA_000277165.1_ASM27716v1	99.8577	0.44641	874	880	99.3182
96_GCA_000277245.1_ASM27724v1	90_GCA_000022785.1_ASM2278v1	99.8577	0.371067	872	881	98.9784
96_GCA_000277245.1_ASM27724v1	88_GCA_001602215.1_ASM160221v1	99.8576	0.372361	872	882	98.8662
88_GCA_001602215.1_ASM160221v1	96_GCA_000277245.1_ASM27724v1	99.8576	0.372361	872	882	98.8662
96_GCA_000277245.1_ASM27724v1	91_GCA_000277185.1_ASM27718v1	99.8564	0.396476	872	883	98.7542
90_GCA_000022785.1_ASM2278v1	93_GCA_000277265.1_ASM27726v1	99.8554	0.553783	874	880	99.3182
89_GCA_000195735.1_ASM19573v1	93_GCA_000277265.1_ASM27726v1	99.855	0.442487	875	880	99.4318
96_GCA_000277245.1_ASM27724v1	92_GCA_000385495.1	99.8549	0.395771	872	884	98.6425
95_GCA_000277165.1_ASM27716v1	93_GCA_000277265.1_ASM27726v1	99.8535	0.545243	874	880	99.3182
96_GCA_000277245.1_ASM27724v1	89_GCA_000195735.1_ASM19573v1	99.8474	0.439118	872	884	98.6425
96_GCA_000277245.1_ASM27724v1	97_GCA_000277225.1_ASM27722v1	99.8401	0.441947	870	884	98.4163
97_GCA_000277225.1_ASM27722v1	96_GCA_000277245.1_ASM27724v1	99.8401	0.441947	870	884	98.4163
93_GCA_000277265.1_ASM27726v1	98_GCA_000367405.1_ASM36740v1	99.8381	0.327707	872	880	99.0909
98_GCA_000367405.1_ASM36740v1	93_GCA_000277265.1_ASM27726v1	99.8381	0.327707	872	880	99.0909
93_GCA_000277265.1_ASM27726v1	97_GCA_000277225.1_ASM27722v1	99.8368	0.545727	872	880	99.0909
64_GCA_000246715.2_ASM24671v2	66_GCA_000166935.1_ASM16693v1	99.8341	0.764849	1390	1407	98.7918
97_GCA_000277225.1_ASM27722v1	93_GCA_000277265.1_ASM27726v1	99.8326	0.629185	872	880	99.0909
96_GCA_000277245.1_ASM27724v1	98_GCA_000367405.1_ASM36740v1	99.8285	0.342134	872	884	98.6425
98_GCA_000367405.1_ASM36740v1	96_GCA_000277245.1_ASM27724v1	99.8285	0.342134	872	884	98.6425
102_GCA_000385475.1	92_GCA_000385495.1	99.8198	0.552008	875	897	97.5474
102_GCA_000385475.1	88_GCA_001602215.1_ASM160221v1	99.8136	0.562653	874	882	99.093
102_GCA_000385475.1	94_GCA_000277205.1_ASM27720v1	99.8125	0.564875	874	880	99.3182
90_GCA_000022785.1_ASM2278v1	102_GCA_000385475.1	99.8125	0.564577	874	881	99.2054
102_GCA_000385475.1	91_GCA_000277185.1_ASM27718v1	99.8124	0.562303	875	883	99.094
95_GCA_000277165.1_ASM27716v1	102_GCA_000385475.1	99.8093	0.565032	874	882	99.093
97_GCA_000277225.1_ASM27722v1	102_GCA_000385475.1	99.8042	0.566185	874	890	98.2022
102_GCA_000385475.1	89_GCA_000195735.1_ASM19573v1	99.8039	0.596072	875	896	97.6562
93_GCA_000277265.1_ASM27726v1	99_GCA_000363905.1_ASM36390v1	99.7869	0.481147	872	880	99.0909
99_GCA_000363905.1_ASM36390v1	93_GCA_000277265.1_ASM27726v1	99.7837	0.537435	872	880	99.0909
98_GCA_000367405.1_ASM36740v1	102_GCA_000385475.1	99.7808	0.582805	876	897	97.6589
99_GCA_000363905.1_ASM36390v1	96_GCA_000277245.1_ASM27724v1	99.7788	0.485547	870	884	98.4163
96_GCA_000277245.1_ASM27724v1	99_GCA_000363905.1_ASM36390v1	99.7788	0.485547	870	884	98.4163
99_GCA_000363905.1_ASM36390v1	102_GCA_000385475.1	99.7299	0.66158	883	921	95.874
78_GCA_000257435.1_RcoIn1.0	61_GCA_000007025.1_ASM702v1	99.716	0.894112	1369	1415	96.7491
8_GCA_000018245.1_ASM1824v1	9_GCA_000012385.1_ASM1238v1	99.5726	1.21303	1403	1503	93.3466
9_GCA_000012385.1_ASM1238v1	8_GCA_000018245.1_ASM1824v1	99.5691	1.24139	1403	1503	93.3466
9_GCA_000012385.1_ASM1238v1	7_GCA_000965005.1_ASM96500v1	99.4688	1.61365	1368	1503	91.018
7_GCA_000965005.1_ASM96500v1	9_GCA_000012385.1_ASM1238v1	99.4686	1.6342	1368	1503	91.018
21_GCA_000284055.1_ASM28405v1	23_GCA_001273795.1_ASM127379v1	99.4417	1.71161	1565	1634	95.7772
23_GCA_001273795.1_ASM127379v1	21_GCA_000284055.1_ASM28405v1	99.4328	1.81602	1565	1634	95.7772
8_GCA_000018245.1_ASM1824v1	7_GCA_000965005.1_ASM96500v1	99.4252	1.91765	1375	1515	90.7591
7_GCA_000965005.1_ASM96500v1	8_GCA_000018245.1_ASM1824v1	99.4174	1.94331	1375	1515	90.7591
23_GCA_001273795.1_ASM127379v1	25_GCA_000964675.1_ASM96467v1	99.3672	3.54393	1505	1596	94.2982
65_GCA_000283935.1_ASM28393v1	73_GCA_000283795.1_ASM28379v1	99.2306	1.92716	1365	1414	96.5347
65_GCA_000283935.1_ASM28393v1	75_GCA_000018225.1_ASM1822v1	99.2304	1.90091	1345	1396	96.3467
65_GCA_000283935.1_ASM28393v1	69_GCA_000831545.1_ASM83154v1	99.2246	1.93701	1367	1415	96.6078
65_GCA_000283935.1_ASM28393v1	70_GCA_000283815.1_ASM28381v1	99.2201	1.94304	1365	1415	96.4664
65_GCA_000283935.1_ASM28393v1	72_GCA_000017445.3_ASM1744v3	99.2199	1.94579	1365	1415	96.4664
76_GCA_000831525.1_ASM83152v1	65_GCA_000283935.1_ASM28393v1	99.2109	2.02419	1345	1396	96.3467
77_GCA_000283955.1_ASM28395v1	65_GCA_000283935.1_ASM28393v1	99.2104	2.05994	1349	1396	96.6332
75_GCA_000018225.1_ASM1822v1	65_GCA_000283935.1_ASM28393v1	99.2097	2.0268	1345	1396	96.3467
72_GCA_000017445.3_ASM1744v3	65_GCA_000283935.1_ASM28393v1	99.205	2.05846	1365	1415	96.4664
70_GCA_000283815.1_ASM28381v1	65_GCA_000283935.1_ASM28393v1	99.204	2.06061	1365	1415	96.4664
71_GCA_000283835.1_ASM28383v1	65_GCA_000283935.1_ASM28393v1	99.2031	2.05852	1367	1415	96.6078
65_GCA_000283935.1_ASM28393v1	68_GCA_000283775.1_ASM28377v1	99.2008	2.18081	1363	1413	96.4614
25_GCA_000964675.1_ASM96467v1	21_GCA_000284055.1_ASM28405v1	99.1842	3.75906	1491	1596	93.4211
21_GCA_000284055.1_ASM28405v1	25_GCA_000964675.1_ASM96467v1	99.1831	3.71792	1491	1596	93.4211
68_GCA_000283775.1_ASM28377v1	65_GCA_000283935.1_ASM28393v1	99.1805	2.28974	1363	1413	96.4614
46_GCA_000284075.1_ASM28407v1	22_GCA_001442475.1_ASM144247v1	99.1577	2.32915	1392	1482	93.9271
22_GCA_001442475.1_ASM144247v1	46_GCA_000284075.1_ASM28407v1	99.1565	2.32616	1392	1482	93.9271
38_SRR5909496_Slati1	31_SRR5259840_Earac4	99.0578	4.16335	1156	1341	86.2043
31_SRR5259840_Earac4	38_SRR5909496_Slati1	99.0518	4.09929	1156	1341	86.2043
65_GCA_000283935.1_ASM28393v1	58_GCA_000283995.1_ASM28399v1	99.0057	2.37738	1336	1404	95.1567
58_GCA_000283995.1_ASM28399v1	65_GCA_000283935.1_ASM28393v1	99.0006	2.37246	1336	1404	95.1567
67_GCA_000261325.1_RcoCa1.0	80_GCA_000263815.1_RcoIs1.0	98.9914	2.38674	1347	1489	90.4634
64_GCA_000246715.2_ASM24671v2	74_GCA_000247625.2_ASM24762v2	98.9779	1.98466	1339	1416	94.5621
74_GCA_000247625.2_ASM24762v2	66_GCA_000166935.1_ASM16693v1	98.9607	2.01547	1326	1407	94.2431
24_GCA_000965185.1_ASM96518v1	55_GCA_000221205.1_ASM22120v1	98.9571	2.28066	1369	1437	95.2679
77_GCA_000283955.1_ASM28395v1	58_GCA_000283995.1_ASM28399v1	98.9102	2.04144	1319	1396	94.4842
75_GCA_000018225.1_ASM1822v1	58_GCA_000283995.1_ASM28399v1	98.894	2.08719	1318	1396	94.4126
70_GCA_000283815.1_ASM28381v1	58_GCA_000283995.1_ASM28399v1	98.8931	2.08165	1335	1404	95.0855
58_GCA_000283995.1_ASM28399v1	75_GCA_000018225.1_ASM1822v1	98.8924	2.09042	1318	1396	94.4126
76_GCA_000831525.1_ASM83152v1	58_GCA_000283995.1_ASM28399v1	98.8916	2.09397	1318	1396	94.4126
72_GCA_000017445.3_ASM1744v3	58_GCA_000283995.1_ASM28399v1	98.8902	2.09465	1335	1404	95.0855
58_GCA_000283995.1_ASM28399v1	73_GCA_000283795.1_ASM28379v1	98.8902	2.08578	1335	1404	95.0855
58_GCA_000283995.1_ASM28399v1	76_GCA_000831525.1_ASM83152v1	98.89	2.09719	1318	1396	94.4126
58_GCA_000283995.1_ASM28399v1	70_GCA_000283815.1_ASM28381v1	98.8873	2.08858	1335	1404	95.0855
58_GCA_000283995.1_ASM28399v1	72_GCA_000017445.3_ASM1744v3	98.8843	2.10153	1335	1404	95.0855
68_GCA_000283775.1_ASM28377v1	58_GCA_000283995.1_ASM28399v1	98.882	2.21292	1335	1404	95.0855
71_GCA_000283835.1_ASM28383v1	58_GCA_000283995.1_ASM28399v1	98.8819	2.10516	1336	1404	95.1567
58_GCA_000283995.1_ASM28399v1	69_GCA_000831545.1_ASM83154v1	98.8806	2.11248	1336	1404	95.1567
58_GCA_000283995.1_ASM28399v1	68_GCA_000283775.1_ASM28377v1	98.8803	2.21599	1335	1404	95.0855
87_GCA_000283915.1_ASM28391v1	86_GCA_000014345.1_ASM1434v1	98.6335	2.38346	968	1031	93.8894
41_SRR5367914_S2	43_SRR5378821_Ssp4	98.619	4.78799	1018	1174	86.7121
57_GCA_000302635.2_ASM30263v2	55_GCA_000221205.1_ASM22120v1	98.6014	2.91736	1347	1430	94.1958
32_SRR5088467_Drufa1	35_SRR3161968_Choog2	98.5958	2.37991	1397	1539	90.7732
43_SRR5378821_Ssp4	41_SRR5367914_S2	98.5947	4.86133	1018	1174	86.7121
35_SRR3161968_Choog2	32_SRR5088467_Drufa1	98.5885	2.42841	1397	1539	90.7732
53_GCA_000283595.1_ASM28359v1	55_GCA_000221205.1_ASM22120v1	98.5848	2.93494	1346	1436	93.7326
61_GCA_000007025.1_ASM702v1	67_GCA_000261325.1_RcoCa1.0	98.5833	2.59629	1318	1415	93.1449
67_GCA_000261325.1_RcoCa1.0	61_GCA_000007025.1_ASM702v1	98.5763	2.61345	1318	1415	93.1449
78_GCA_000257435.1_RcoIn1.0	67_GCA_000261325.1_RcoCa1.0	98.5326	2.83912	1314	1438	91.3769
57_GCA_000302635.2_ASM30263v2	24_GCA_000965185.1_ASM96518v1	98.4935	3.68545	1341	1430	93.7762
53_GCA_000283595.1_ASM28359v1	24_GCA_000965185.1_ASM96518v1	98.4675	3.71842	1341	1436	93.3844
78_GCA_000257435.1_RcoIn1.0	56_GCA_000237845.1_ASM23784v1	98.4651	2.40961	1303	1438	90.612
66_GCA_000166935.1_ASM16693v1	49_GCA_000965075.1_ASM96507v1	98.4637	3.37086	1315	1407	93.4613
78_GCA_000257435.1_RcoIn1.0	54_GCA_000252365.1_ASM25236v1	98.4567	2.45904	1302	1438	90.5424
47_GCA_000284195.1_ASM28419v1	66_GCA_000166935.1_ASM16693v1	98.4485	3.39868	1316	1407	93.5323
66_GCA_000166935.1_ASM16693v1	48_GCA_000965145.1_ASM96514v1	98.4403	3.39099	1316	1407	93.5323
48_GCA_000965145.1_ASM96514v1	66_GCA_000166935.1_ASM16693v1	98.4398	3.39985	1316	1407	93.5323
56_GCA_000237845.1_ASM23784v1	61_GCA_000007025.1_ASM702v1	98.4341	2.48048	1317	1415	93.0742
61_GCA_000007025.1_ASM702v1	56_GCA_000237845.1_ASM23784v1	98.4299	2.48628	1317	1415	93.0742
54_GCA_000252365.1_ASM25236v1	61_GCA_000007025.1_ASM702v1	98.4285	2.52406	1318	1415	93.1449
61_GCA_000007025.1_ASM702v1	54_GCA_000252365.1_ASM25236v1	98.4242	2.5299	1318	1415	93.1449
56_GCA_000237845.1_ASM23784v1	48_GCA_000965145.1_ASM96514v1	98.4221	3.38474	1330	1440	92.3611
64_GCA_000246715.2_ASM24671v2	49_GCA_000965075.1_ASM96507v1	98.418	3.74302	1321	1416	93.291
56_GCA_000237845.1_ASM23784v1	47_GCA_000284195.1_ASM28419v1	98.4156	3.41002	1332	1440	92.5
47_GCA_000284195.1_ASM28419v1	56_GCA_000237845.1_ASM23784v1	98.415	3.40936	1332	1440	92.5
54_GCA_000252365.1_ASM25236v1	48_GCA_000965145.1_ASM96514v1	98.4145	3.41382	1332	1440	92.5
56_GCA_000237845.1_ASM23784v1	49_GCA_000965075.1_ASM96507v1	98.4141	3.40619	1332	1441	92.4358
47_GCA_000284195.1_ASM28419v1	52_GCA_000023005.1_ASM2300v1	98.4089	3.6371	1327	1437	92.3452
64_GCA_000246715.2_ASM24671v2	47_GCA_000284195.1_ASM28419v1	98.4088	3.75553	1321	1416	93.291
54_GCA_000252365.1_ASM25236v1	47_GCA_000284195.1_ASM28419v1	98.4079	3.43881	1334	1440	92.6389
47_GCA_000284195.1_ASM28419v1	54_GCA_000252365.1_ASM25236v1	98.4072	3.43816	1334	1440	92.6389
54_GCA_000252365.1_ASM25236v1	49_GCA_000965075.1_ASM96507v1	98.4064	3.43502	1334	1441	92.5746
64_GCA_000246715.2_ASM24671v2	48_GCA_000965145.1_ASM96514v1	98.4013	3.7557	1321	1416	93.291
61_GCA_000007025.1_ASM702v1	80_GCA_000263815.1_RcoIs1.0	98.4008	3.3083	1286	1415	90.8834
80_GCA_000263815.1_RcoIs1.0	61_GCA_000007025.1_ASM702v1	98.3989	3.31105	1286	1415	90.8834
52_GCA_000023005.1_ASM2300v1	49_GCA_000965075.1_ASM96507v1	98.3939	3.6661	1327	1437	92.3452
52_GCA_000023005.1_ASM2300v1	48_GCA_000965145.1_ASM96514v1	98.3902	3.67212	1324	1437	92.1364
52_GCA_000023005.1_ASM2300v1	47_GCA_000284195.1_ASM28419v1	98.3879	3.67552	1327	1437	92.3452
47_GCA_000284195.1_ASM28419v1	78_GCA_000257435.1_RcoIn1.0	98.3839	3.13607	1287	1438	89.4993
78_GCA_000257435.1_RcoIn1.0	48_GCA_000965145.1_ASM96514v1	98.3836	3.12723	1284	1438	89.2907
78_GCA_000257435.1_RcoIn1.0	47_GCA_000284195.1_ASM28419v1	98.3798	3.14787	1287	1438	89.4993
49_GCA_000965075.1_ASM96507v1	78_GCA_000257435.1_RcoIn1.0	98.3795	3.13876	1288	1438	89.5688
78_GCA_000257435.1_RcoIn1.0	49_GCA_000965075.1_ASM96507v1	98.3753	3.15062	1288	1438	89.5688
48_GCA_000965145.1_ASM96514v1	61_GCA_000007025.1_ASM702v1	98.3687	3.19033	1305	1415	92.2261
61_GCA_000007025.1_ASM702v1	48_GCA_000965145.1_ASM96514v1	98.3678	3.19072	1305	1415	92.2261
47_GCA_000284195.1_ASM28419v1	61_GCA_000007025.1_ASM702v1	98.366	3.21454	1308	1415	92.4382
80_GCA_000263815.1_RcoIs1.0	78_GCA_000257435.1_RcoIn1.0	98.363	3.36103	1282	1438	89.1516
61_GCA_000007025.1_ASM702v1	47_GCA_000284195.1_ASM28419v1	98.3572	3.22575	1308	1415	92.4382
78_GCA_000257435.1_RcoIn1.0	80_GCA_000263815.1_RcoIs1.0	98.3569	3.38161	1282	1438	89.1516
49_GCA_000965075.1_ASM96507v1	61_GCA_000007025.1_ASM702v1	98.3555	3.22243	1307	1415	92.3675
61_GCA_000007025.1_ASM702v1	49_GCA_000965075.1_ASM96507v1	98.3546	3.22281	1307	1415	92.3675
20_SRR2939019_Btrans1	14_SRR5168443_Sanch3	98.3488	7.57307	1172	1522	77.0039
56_GCA_000237845.1_ASM23784v1	67_GCA_000261325.1_RcoCa1.0	98.3462	2.69128	1324	1442	91.8169
54_GCA_000252365.1_ASM25236v1	67_GCA_000261325.1_RcoCa1.0	98.3422	2.72766	1325	1441	91.95
67_GCA_000261325.1_RcoCa1.0	56_GCA_000237845.1_ASM23784v1	98.3333	2.69442	1324	1442	91.8169
67_GCA_000261325.1_RcoCa1.0	54_GCA_000252365.1_ASM25236v1	98.3293	2.73074	1325	1441	91.95
14_SRR5168443_Sanch3	20_SRR2939019_Btrans1	98.3202	7.6674	1172	1522	77.0039
74_GCA_000247625.2_ASM24762v2	48_GCA_000965145.1_ASM96514v1	98.278	3.74503	1312	1440	91.1111
74_GCA_000247625.2_ASM24762v2	47_GCA_000284195.1_ASM28419v1	98.2696	3.76818	1313	1440	91.1806
64_GCA_000246715.2_ASM24671v2	52_GCA_000023005.1_ASM2300v1	98.2692	2.78322	1294	1416	91.3842
74_GCA_000247625.2_ASM24762v2	49_GCA_000965075.1_ASM96507v1	98.2651	3.77707	1314	1441	91.1867
62_GCA_000964905.1_ASM96490v1	33_GCA_000016625.1_ASM1662v1	98.26	4.03395	1305	1419	91.9662
52_GCA_000023005.1_ASM2300v1	66_GCA_000166935.1_ASM16693v1	98.2443	2.93835	1292	1407	91.8266
33_GCA_000016625.1_ASM1662v1	59_GCA_000283855.1_ASM28385v1	98.2157	4.13355	1320	1433	92.1144
64_GCA_000246715.2_ASM24671v2	78_GCA_000257435.1_RcoIn1.0	98.2107	2.79844	1288	1416	90.9605
66_GCA_000166935.1_ASM16693v1	61_GCA_000007025.1_ASM702v1	98.2095	3.09215	1291	1407	91.7555
78_GCA_000257435.1_RcoIn1.0	66_GCA_000166935.1_ASM16693v1	98.2067	2.83377	1280	1407	90.9737
61_GCA_000007025.1_ASM702v1	66_GCA_000166935.1_ASM16693v1	98.2058	3.10535	1291	1407	91.7555
64_GCA_000246715.2_ASM24671v2	61_GCA_000007025.1_ASM702v1	98.2032	3.06313	1291	1415	91.2367
64_GCA_000246715.2_ASM24671v2	56_GCA_000237845.1_ASM23784v1	98.178	3.32144	1314	1416	92.7966
74_GCA_000247625.2_ASM24762v2	52_GCA_000023005.1_ASM2300v1	98.1746	2.72121	1296	1437	90.1879
64_GCA_000246715.2_ASM24671v2	54_GCA_000252365.1_ASM25236v1	98.1737	3.35046	1316	1416	92.9379
56_GCA_000237845.1_ASM23784v1	80_GCA_000263815.1_RcoIs1.0	98.1714	2.95036	1293	1442	89.6671
54_GCA_000252365.1_ASM25236v1	80_GCA_000263815.1_RcoIs1.0	98.1684	2.97974	1295	1441	89.8681
47_GCA_000284195.1_ASM28419v1	67_GCA_000261325.1_RcoCa1.0	98.1618	3.93594	1311	1440	91.0417
52_GCA_000023005.1_ASM2300v1	74_GCA_000247625.2_ASM24762v2	98.1601	2.75322	1296	1437	90.1879
56_GCA_000237845.1_ASM23784v1	39_GCA_000021525.1_ASM2152v1	98.1587	3.9265	1270	1442	88.0721
56_GCA_000237845.1_ASM23784v1	66_GCA_000166935.1_ASM16693v1	98.1545	3.43453	1312	1407	93.248
49_GCA_000965075.1_ASM96507v1	67_GCA_000261325.1_RcoCa1.0	98.1542	3.94251	1311	1441	90.9785
54_GCA_000252365.1_ASM25236v1	66_GCA_000166935.1_ASM16693v1	98.1529	3.46159	1313	1407	93.3191
54_GCA_000252365.1_ASM25236v1	39_GCA_000021525.1_ASM2152v1	98.1503	3.95009	1270	1441	88.1332
67_GCA_000261325.1_RcoCa1.0	48_GCA_000965145.1_ASM96514v1	98.1457	3.94845	1310	1440	90.9722
67_GCA_000261325.1_RcoCa1.0	47_GCA_000284195.1_ASM28419v1	98.1443	3.94862	1311	1440	91.0417
67_GCA_000261325.1_RcoCa1.0	49_GCA_000965075.1_ASM96507v1	98.1368	3.95502	1311	1441	90.9785
74_GCA_000247625.2_ASM24762v2	56_GCA_000237845.1_ASM23784v1	98.1273	3.4074	1300	1442	90.1526
56_GCA_000237845.1_ASM23784v1	74_GCA_000247625.2_ASM24762v2	98.1225	3.41818	1300	1442	90.1526
74_GCA_000247625.2_ASM24762v2	54_GCA_000252365.1_ASM25236v1	98.1081	3.47257	1302	1441	90.3539
54_GCA_000252365.1_ASM25236v1	74_GCA_000247625.2_ASM24762v2	98.1033	3.48311	1302	1441	90.3539
61_GCA_000007025.1_ASM702v1	52_GCA_000023005.1_ASM2300v1	98.1006	3.44861	1292	1415	91.3074
52_GCA_000023005.1_ASM2300v1	56_GCA_000237845.1_ASM23784v1	98.0866	3.96937	1310	1437	91.1621
52_GCA_000023005.1_ASM2300v1	54_GCA_000252365.1_ASM25236v1	98.0834	3.98756	1311	1437	91.2317
52_GCA_000023005.1_ASM2300v1	61_GCA_000007025.1_ASM702v1	98.0828	3.48618	1292	1415	91.3074
78_GCA_000257435.1_RcoIn1.0	52_GCA_000023005.1_ASM2300v1	98.0714	3.9721	1276	1437	88.7961
56_GCA_000237845.1_ASM23784v1	52_GCA_000023005.1_ASM2300v1	98.0661	4.13768	1310	1437	91.1621
54_GCA_000252365.1_ASM25236v1	52_GCA_000023005.1_ASM2300v1	98.0606	4.15949	1311	1437	91.2317
64_GCA_000246715.2_ASM24671v2	67_GCA_000261325.1_RcoCa1.0	98.0537	3.18962	1298	1416	91.6667
66_GCA_000166935.1_ASM16693v1	67_GCA_000261325.1_RcoCa1.0	98.0518	3.18486	1289	1407	91.6134
52_GCA_000023005.1_ASM2300v1	67_GCA_000261325.1_RcoCa1.0	98.04	3.07177	1293	1437	89.9791
78_GCA_000257435.1_RcoIn1.0	74_GCA_000247625.2_ASM24762v2	98.0362	3.97006	1279	1438	88.943
67_GCA_000261325.1_RcoCa1.0	66_GCA_000166935.1_ASM16693v1	98.0337	3.26109	1289	1407	91.6134
67_GCA_000261325.1_RcoCa1.0	52_GCA_000023005.1_ASM2300v1	98.0288	3.11437	1293	1437	89.9791
74_GCA_000247625.2_ASM24762v2	61_GCA_000007025.1_ASM702v1	98.006	4.08395	1287	1415	90.9541
61_GCA_000007025.1_ASM702v1	74_GCA_000247625.2_ASM24762v2	98.0044	4.08965	1287	1415	90.9541
48_GCA_000965145.1_ASM96514v1	80_GCA_000263815.1_RcoIs1.0	97.9918	4.46834	1280	1440	88.8889
80_GCA_000263815.1_RcoIs1.0	48_GCA_000965145.1_ASM96514v1	97.9865	4.46985	1280	1440	88.8889
47_GCA_000284195.1_ASM28419v1	80_GCA_000263815.1_RcoIs1.0	97.9862	4.48539	1283	1440	89.0972
80_GCA_000263815.1_RcoIs1.0	47_GCA_000284195.1_ASM28419v1	97.9809	4.48688	1283	1440	89.0972
49_GCA_000965075.1_ASM96507v1	80_GCA_000263815.1_RcoIs1.0	97.9781	4.49222	1281	1441	88.8966
80_GCA_000263815.1_RcoIs1.0	49_GCA_000965075.1_ASM96507v1	97.9729	4.49363	1281	1441	88.8966
52_GCA_000023005.1_ASM2300v1	80_GCA_000263815.1_RcoIs1.0	97.9261	3.52971	1261	1437	87.7523
64_GCA_000246715.2_ASM24671v2	80_GCA_000263815.1_RcoIs1.0	97.9027	3.43193	1275	1416	90.0424
74_GCA_000247625.2_ASM24762v2	67_GCA_000261325.1_RcoCa1.0	97.8951	3.94116	1307	1448	90.2624
54_GCA_000252365.1_ASM25236v1	60_GCA_000263055.1_Rho1.0	97.8937	3.7657	1307	1441	90.7009
60_GCA_000263055.1_Rho1.0	54_GCA_000252365.1_ASM25236v1	97.8928	3.76751	1307	1441	90.7009
66_GCA_000166935.1_ASM16693v1	80_GCA_000263815.1_RcoIs1.0	97.8901	3.45432	1267	1407	90.0498
67_GCA_000261325.1_RcoCa1.0	74_GCA_000247625.2_ASM24762v2	97.8895	3.94609	1307	1448	90.2624
56_GCA_000237845.1_ASM23784v1	60_GCA_000263055.1_Rho1.0	97.8858	3.7682	1308	1442	90.7074
80_GCA_000263815.1_RcoIs1.0	66_GCA_000166935.1_ASM16693v1	97.8851	3.49719	1267	1407	90.0498
60_GCA_000263055.1_Rho1.0	56_GCA_000237845.1_ASM23784v1	97.8848	3.77001	1308	1442	90.7074
27_SRR6004191_Lappe3	12_SRR5170144_Pante1	97.8795	6.10721	1152	1326	86.8778
12_SRR5170144_Pante1	27_SRR6004191_Lappe3	97.8748	6.12677	1152	1326	86.8778
74_GCA_000247625.2_ASM24762v2	80_GCA_000263815.1_RcoIs1.0	97.7382	4.08142	1291	1448	89.1575
58_GCA_000283995.1_ASM28399v1	56_GCA_000237845.1_ASM23784v1	97.7133	3.26481	1274	1404	90.7407
58_GCA_000283995.1_ASM28399v1	54_GCA_000252365.1_ASM25236v1	97.6969	3.31384	1275	1404	90.812
56_GCA_000237845.1_ASM23784v1	58_GCA_000283995.1_ASM28399v1	97.6957	3.3848	1274	1404	90.7407
54_GCA_000252365.1_ASM25236v1	58_GCA_000283995.1_ASM28399v1	97.6862	3.41116	1275	1404	90.812
58_GCA_000283995.1_ASM28399v1	39_GCA_000021525.1_ASM2152v1	97.6794	4.73636	1237	1404	88.1054
46_GCA_000284075.1_ASM28407v1	33_GCA_000016625.1_ASM1662v1	97.5759	4.25897	1291	1482	87.112
33_GCA_000016625.1_ASM1662v1	46_GCA_000284075.1_ASM28407v1	97.5709	4.27805	1291	1482	87.112
67_GCA_000261325.1_RcoCa1.0	39_GCA_000021525.1_ASM2152v1	97.549	4.3808	1246	1489	83.6803
65_GCA_000283935.1_ASM28393v1	39_GCA_000021525.1_ASM2152v1	97.5462	5.11322	1236	1415	87.3498
39_GCA_000021525.1_ASM2152v1	78_GCA_000257435.1_RcoIn1.0	97.5289	4.65266	1222	1438	84.9791
59_GCA_000283855.1_ASM28385v1	22_GCA_001442475.1_ASM144247v1	97.5269	3.57185	1243	1433	86.7411
65_GCA_000283935.1_ASM28393v1	56_GCA_000237845.1_ASM23784v1	97.523	3.67756	1272	1415	89.894
62_GCA_000964905.1_ASM96490v1	46_GCA_000284075.1_ASM28407v1	97.5171	4.03923	1233	1419	86.8922
65_GCA_000283935.1_ASM28393v1	54_GCA_000252365.1_ASM25236v1	97.5051	3.71539	1273	1415	89.9647
56_GCA_000237845.1_ASM23784v1	65_GCA_000283935.1_ASM28393v1	97.4961	3.76266	1272	1415	89.894
39_GCA_000021525.1_ASM2152v1	61_GCA_000007025.1_ASM702v1	97.4959	4.74451	1246	1415	88.0565
77_GCA_000283955.1_ASM28395v1	56_GCA_000237845.1_ASM23784v1	97.4957	3.53664	1259	1396	90.1862
77_GCA_000283955.1_ASM28395v1	54_GCA_000252365.1_ASM25236v1	97.4851	3.57172	1259	1396	90.1862
54_GCA_000252365.1_ASM25236v1	65_GCA_000283935.1_ASM28393v1	97.4783	3.79945	1273	1415	89.9647
56_GCA_000237845.1_ASM23784v1	75_GCA_000018225.1_ASM1822v1	97.4782	3.6635	1258	1396	90.1146
39_GCA_000021525.1_ASM2152v1	77_GCA_000283955.1_ASM28395v1	97.4768	5.31602	1218	1396	87.2493
56_GCA_000237845.1_ASM23784v1	76_GCA_000831525.1_ASM83152v1	97.4748	3.68017	1258	1396	90.1146
54_GCA_000252365.1_ASM25236v1	75_GCA_000018225.1_ASM1822v1	97.466	3.70191	1258	1396	90.1146
39_GCA_000021525.1_ASM2152v1	47_GCA_000284195.1_ASM28419v1	97.4634	5.53123	1259	1440	87.4306
54_GCA_000252365.1_ASM25236v1	76_GCA_000831525.1_ASM83152v1	97.4623	3.71905	1258	1396	90.1146
47_GCA_000284195.1_ASM28419v1	39_GCA_000021525.1_ASM2152v1	97.4622	5.51382	1259	1440	87.4306
39_GCA_000021525.1_ASM2152v1	48_GCA_000965145.1_ASM96514v1	97.4614	5.53064	1260	1440	87.5
48_GCA_000965145.1_ASM96514v1	39_GCA_000021525.1_ASM2152v1	97.4603	5.51324	1260	1440	87.5
75_GCA_000018225.1_ASM1822v1	56_GCA_000237845.1_ASM23784v1	97.4568	3.79686	1258	1396	90.1146
39_GCA_000021525.1_ASM2152v1	49_GCA_000965075.1_ASM96507v1	97.4559	5.54654	1258	1441	87.3005
39_GCA_000021525.1_ASM2152v1	76_GCA_000831525.1_ASM83152v1	97.4537	5.47471	1214	1396	86.9628
62_GCA_000964905.1_ASM96490v1	22_GCA_001442475.1_ASM144247v1	97.4507	4.29571	1234	1419	86.9626
76_GCA_000831525.1_ASM83152v1	56_GCA_000237845.1_ASM23784v1	97.4503	3.82872	1258	1396	90.1146
39_GCA_000021525.1_ASM2152v1	73_GCA_000283795.1_ASM28379v1	97.4493	5.43182	1230	1414	86.9873
56_GCA_000237845.1_ASM23784v1	73_GCA_000283795.1_ASM28379v1	97.4481	3.7216	1269	1414	89.7454
46_GCA_000284075.1_ASM28407v1	59_GCA_000283855.1_ASM28385v1	97.4478	4.22865	1246	1433	86.9505
56_GCA_000237845.1_ASM23784v1	72_GCA_000017445.3_ASM1744v3	97.4473	3.6991	1270	1417	89.626
56_GCA_000237845.1_ASM23784v1	70_GCA_000283815.1_ASM28381v1	97.4451	3.69282	1270	1415	89.7527
75_GCA_000018225.1_ASM1822v1	54_GCA_000252365.1_ASM25236v1	97.4446	3.83386	1258	1396	90.1146
75_GCA_000018225.1_ASM1822v1	39_GCA_000021525.1_ASM2152v1	97.4439	5.51207	1214	1396	86.9628
76_GCA_000831525.1_ASM83152v1	54_GCA_000252365.1_ASM25236v1	97.4378	3.86604	1258	1396	90.1146
54_GCA_000252365.1_ASM25236v1	73_GCA_000283795.1_ASM28379v1	97.437	3.75326	1270	1414	89.8161
54_GCA_000252365.1_ASM25236v1	72_GCA_000017445.3_ASM1744v3	97.4351	3.73372	1271	1417	89.6965
71_GCA_000283835.1_ASM28383v1	56_GCA_000237845.1_ASM23784v1	97.4331	3.79821	1271	1416	89.7599
54_GCA_000252365.1_ASM25236v1	70_GCA_000283815.1_ASM28381v1	97.4322	3.72963	1271	1415	89.8233
70_GCA_000283815.1_ASM28381v1	56_GCA_000237845.1_ASM23784v1	97.4321	3.81238	1270	1415	89.7527
70_GCA_000283815.1_ASM28381v1	39_GCA_000021525.1_ASM2152v1	97.4292	5.49048	1231	1415	86.9965
56_GCA_000237845.1_ASM23784v1	69_GCA_000831545.1_ASM83154v1	97.4237	3.7483	1273	1419	89.7111
71_GCA_000283835.1_ASM28383v1	54_GCA_000252365.1_ASM25236v1	97.4202	3.8338	1272	1416	89.8305
70_GCA_000283815.1_ASM28381v1	54_GCA_000252365.1_ASM25236v1	97.4192	3.84791	1271	1415	89.8233
71_GCA_000283835.1_ASM28383v1	39_GCA_000021525.1_ASM2152v1	97.419	5.49074	1232	1416	87.0056
72_GCA_000017445.3_ASM1744v3	39_GCA_000021525.1_ASM2152v1	97.415	5.50655	1232	1417	86.9442
74_GCA_000247625.2_ASM24762v2	39_GCA_000021525.1_ASM2152v1	97.4123	4.36072	1239	1448	85.5663
54_GCA_000252365.1_ASM25236v1	69_GCA_000831545.1_ASM83154v1	97.4109	3.78434	1274	1419	89.7815
39_GCA_000021525.1_ASM2152v1	69_GCA_000831545.1_ASM83154v1	97.3995	5.5391	1233	1419	86.8922
72_GCA_000017445.3_ASM1744v3	56_GCA_000237845.1_ASM23784v1	97.3993	4.00211	1270	1417	89.626
68_GCA_000283775.1_ASM28377v1	39_GCA_000021525.1_ASM2152v1	97.3938	5.72303	1233	1413	87.2611
72_GCA_000017445.3_ASM1744v3	54_GCA_000252365.1_ASM25236v1	97.3878	4.03225	1271	1417	89.6965
64_GCA_000246715.2_ASM24671v2	39_GCA_000021525.1_ASM2152v1	97.3784	5.16079	1237	1416	87.3588
39_GCA_000021525.1_ASM2152v1	80_GCA_000263815.1_RcoIs1.0	97.3783	4.36001	1220	1489	81.9342
52_GCA_000023005.1_ASM2300v1	39_GCA_000021525.1_ASM2152v1	97.3751	4.55726	1235	1437	85.9429
39_GCA_000021525.1_ASM2152v1	66_GCA_000166935.1_ASM16693v1	97.3746	5.22188	1234	1407	87.7043
56_GCA_000237845.1_ASM23784v1	68_GCA_000283775.1_ASM28377v1	97.3664	4.35542	1273	1413	90.092
54_GCA_000252365.1_ASM25236v1	68_GCA_000283775.1_ASM28377v1	97.3584	4.37463	1274	1413	90.1628
68_GCA_000283775.1_ASM28377v1	56_GCA_000237845.1_ASM23784v1	97.3452	4.46649	1273	1413	90.092
39_GCA_000021525.1_ASM2152v1	60_GCA_000263055.1_Rho1.0	97.3432	4.84758	1255	1465	85.6655
68_GCA_000283775.1_ASM28377v1	54_GCA_000252365.1_ASM25236v1	97.3372	4.4851	1274	1413	90.1628
60_GCA_000263055.1_Rho1.0	61_GCA_000007025.1_ASM702v1	97.3008	4.11414	1286	1415	90.8834
39_GCA_000021525.1_ASM2152v1	81_SRR5308138_Pfluc4	97.2943	3.95969	1203	1400	85.9286
58_GCA_000283995.1_ASM28399v1	61_GCA_000007025.1_ASM702v1	97.2912	3.45163	1238	1404	88.1766
61_GCA_000007025.1_ASM702v1	58_GCA_000283995.1_ASM28399v1	97.2897	3.44215	1238	1404	88.1766
61_GCA_000007025.1_ASM702v1	60_GCA_000263055.1_Rho1.0	97.285	4.20219	1286	1415	90.8834
78_GCA_000257435.1_RcoIn1.0	58_GCA_000283995.1_ASM28399v1	97.2666	3.48497	1228	1404	87.4644
48_GCA_000965145.1_ASM96514v1	60_GCA_000263055.1_Rho1.0	97.2574	4.75884	1287	1440	89.375
47_GCA_000284195.1_ASM28419v1	60_GCA_000263055.1_Rho1.0	97.2524	4.76577	1287	1440	89.375
82_SRR5176627_Gbili3	3_Ricimp-plasmids	97.2519	6.40838	1011	1261	80.1745
60_GCA_000263055.1_Rho1.0	67_GCA_000261325.1_RcoCa1.0	97.2474	3.83322	1285	1465	87.7133
67_GCA_000261325.1_RcoCa1.0	60_GCA_000263055.1_Rho1.0	97.2449	3.80625	1285	1465	87.7133
78_GCA_000257435.1_RcoIn1.0	60_GCA_000263055.1_Rho1.0	97.2436	4.38166	1275	1438	88.6648
49_GCA_000965075.1_ASM96507v1	60_GCA_000263055.1_Rho1.0	97.2366	4.77643	1287	1441	89.313
60_GCA_000263055.1_Rho1.0	49_GCA_000965075.1_ASM96507v1	97.2307	4.80445	1287	1441	89.313
52_GCA_000023005.1_ASM2300v1	60_GCA_000263055.1_Rho1.0	97.2221	4.05431	1269	1437	88.309
60_GCA_000263055.1_Rho1.0	52_GCA_000023005.1_ASM2300v1	97.221	4.04661	1269	1437	88.309
39_GCA_000021525.1_ASM2152v1	79_GCA_001602635.1_ASM160263v1	97.2206	4.28138	1201	1419	84.6371
81_SRR5308138_Pfluc4	58_GCA_000283995.1_ASM28399v1	97.2183	4.07392	1245	1400	88.9286
58_GCA_000283995.1_ASM28399v1	81_SRR5308138_Pfluc4	97.2122	4.08233	1245	1400	88.9286
79_GCA_001602635.1_ASM160263v1	58_GCA_000283995.1_ASM28399v1	97.1996	4.07542	1243	1404	88.5328
82_SRR5176627_Gbili3	10_SRR5909600_Psono2	97.1734	6.98449	1002	1261	79.4607
81_SRR5308138_Pfluc4	65_GCA_000283935.1_ASM28393v1	97.1206	4.18853	1246	1400	89
56_GCA_000237845.1_ASM23784v1	81_SRR5308138_Pfluc4	97.1171	3.59791	1256	1400	89.7143
77_GCA_000283955.1_ASM28395v1	81_SRR5308138_Pfluc4	97.1125	3.99876	1229	1396	88.0372
22_GCA_001442475.1_ASM144247v1	33_GCA_000016625.1_ASM1662v1	97.1114	5.71089	1319	1561	84.4971
74_GCA_000247625.2_ASM24762v2	60_GCA_000263055.1_Rho1.0	97.1113	4.28516	1275	1448	88.0525
64_GCA_000246715.2_ASM24671v2	58_GCA_000283995.1_ASM28399v1	97.1105	4.22288	1240	1404	88.3191
81_SRR5308138_Pfluc4	56_GCA_000237845.1_ASM23784v1	97.1093	3.64104	1256	1400	89.7143
79_GCA_001602635.1_ASM160263v1	65_GCA_000283935.1_ASM28393v1	97.1079	4.1815	1243	1415	87.8445
54_GCA_000252365.1_ASM25236v1	81_SRR5308138_Pfluc4	97.1034	3.63699	1257	1400	89.7857
64_GCA_000246715.2_ASM24671v2	60_GCA_000263055.1_Rho1.0	97.1021	4.61623	1269	1416	89.6186
81_SRR5308138_Pfluc4	54_GCA_000252365.1_ASM25236v1	97.0956	3.6796	1257	1400	89.7857
58_GCA_000283995.1_ASM28399v1	48_GCA_000965145.1_ASM96514v1	97.0947	4.53205	1268	1404	90.3134
60_GCA_000263055.1_Rho1.0	74_GCA_000247625.2_ASM24762v2	97.0931	4.31889	1275	1448	88.0525
79_GCA_001602635.1_ASM160263v1	77_GCA_000283955.1_ASM28395v1	97.0898	4.00298	1225	1396	87.7507
58_GCA_000283995.1_ASM28399v1	47_GCA_000284195.1_ASM28419v1	97.0882	4.54837	1270	1404	90.4558
77_GCA_000283955.1_ASM28395v1	79_GCA_001602635.1_ASM160263v1	97.0876	4.00447	1225	1396	87.7507
47_GCA_000284195.1_ASM28419v1	58_GCA_000283995.1_ASM28399v1	97.0821	4.54856	1270	1404	90.4558
58_GCA_000283995.1_ASM28399v1	66_GCA_000166935.1_ASM16693v1	97.082	4.55163	1239	1404	88.2479
58_GCA_000283995.1_ASM28399v1	49_GCA_000965075.1_ASM96507v1	97.0816	4.56542	1269	1404	90.3846
58_GCA_000283995.1_ASM28399v1	67_GCA_000261325.1_RcoCa1.0	97.0814	3.89588	1251	1404	89.1026
81_SRR5308138_Pfluc4	76_GCA_000831525.1_ASM83152v1	97.0623	4.37404	1228	1396	87.9656
67_GCA_000261325.1_RcoCa1.0	58_GCA_000283995.1_ASM28399v1	97.0618	3.92496	1251	1404	89.1026
76_GCA_000831525.1_ASM83152v1	81_SRR5308138_Pfluc4	97.0612	4.37336	1228	1396	87.9656
81_SRR5308138_Pfluc4	75_GCA_000018225.1_ASM1822v1	97.0606	4.37556	1228	1396	87.9656
79_GCA_001602635.1_ASM160263v1	56_GCA_000237845.1_ASM23784v1	97.0481	3.98205	1254	1419	88.3721
66_GCA_000166935.1_ASM16693v1	60_GCA_000263055.1_Rho1.0	97.0433	4.98662	1265	1407	89.9076
77_GCA_000283955.1_ASM28395v1	61_GCA_000007025.1_ASM702v1	97.0422	4.00472	1228	1396	87.9656
79_GCA_001602635.1_ASM160263v1	76_GCA_000831525.1_ASM83152v1	97.0367	4.37797	1226	1396	87.8223
79_GCA_001602635.1_ASM160263v1	75_GCA_000018225.1_ASM1822v1	97.035	4.37948	1226	1396	87.8223
76_GCA_000831525.1_ASM83152v1	79_GCA_001602635.1_ASM160263v1	97.0344	4.37867	1226	1396	87.8223
79_GCA_001602635.1_ASM160263v1	54_GCA_000252365.1_ASM25236v1	97.0344	4.01692	1255	1419	88.4426
60_GCA_000263055.1_Rho1.0	66_GCA_000166935.1_ASM16693v1	97.0239	5.04185	1265	1407	89.9076
68_GCA_000283775.1_ASM28377v1	81_SRR5308138_Pfluc4	97.02	4.52602	1240	1400	88.5714
81_SRR5308138_Pfluc4	68_GCA_000283775.1_ASM28377v1	97.0183	4.52885	1240	1400	88.5714
72_GCA_000017445.3_ASM1744v3	81_SRR5308138_Pfluc4	97.0169	4.41037	1243	1400	88.7857
61_GCA_000007025.1_ASM702v1	76_GCA_000831525.1_ASM83152v1	97.0148	4.19812	1229	1396	88.0372
81_SRR5308138_Pfluc4	73_GCA_000283795.1_ASM28379v1	97.0141	4.42025	1241	1400	88.6429
61_GCA_000007025.1_ASM702v1	75_GCA_000018225.1_ASM1822v1	97.0117	4.20585	1229	1396	88.0372
76_GCA_000831525.1_ASM83152v1	61_GCA_000007025.1_ASM702v1	97.0108	4.20072	1229	1396	88.0372
71_GCA_000283835.1_ASM28383v1	81_SRR5308138_Pfluc4	97.0086	4.41719	1242	1400	88.7143
70_GCA_000283815.1_ASM28381v1	81_SRR5308138_Pfluc4	97.0072	4.42126	1243	1400	88.7857
81_SRR5308138_Pfluc4	69_GCA_000831545.1_ASM83154v1	97.0048	4.4195	1243	1400	88.7857
75_GCA_000018225.1_ASM1822v1	61_GCA_000007025.1_ASM702v1	97.0042	4.22204	1229	1396	88.0372
81_SRR5308138_Pfluc4	70_GCA_000283815.1_ASM28381v1	97.0018	4.42592	1243	1400	88.7857
79_GCA_001602635.1_ASM160263v1	68_GCA_000283775.1_ASM28377v1	96.9935	4.53226	1238	1413	87.615
72_GCA_000017445.3_ASM1744v3	79_GCA_001602635.1_ASM160263v1	96.9921	4.41511	1241	1417	87.5794
72_GCA_000017445.3_ASM1744v3	61_GCA_000007025.1_ASM702v1	96.9908	4.19289	1240	1415	87.6325
79_GCA_001602635.1_ASM160263v1	73_GCA_000283795.1_ASM28379v1	96.9901	4.42367	1239	1414	87.6238
65_GCA_000283935.1_ASM28393v1	67_GCA_000261325.1_RcoCa1.0	96.9896	4.22948	1247	1415	88.1272
79_GCA_001602635.1_ASM160263v1	72_GCA_000017445.3_ASM1744v3	96.9879	4.41845	1241	1417	87.5794
61_GCA_000007025.1_ASM702v1	72_GCA_000017445.3_ASM1744v3	96.9875	4.20562	1240	1415	87.6325
65_GCA_000283935.1_ASM28393v1	49_GCA_000965075.1_ASM96507v1	96.9865	5.1783	1265	1415	89.3993
77_GCA_000283955.1_ASM28395v1	49_GCA_000965075.1_ASM96507v1	96.9852	4.53936	1249	1396	89.4699
71_GCA_000283835.1_ASM28383v1	79_GCA_001602635.1_ASM160263v1	96.9838	4.42188	1240	1416	87.5706
79_GCA_001602635.1_ASM160263v1	71_GCA_000283835.1_ASM28383v1	96.9837	4.42339	1240	1416	87.5706
70_GCA_000283815.1_ASM28381v1	61_GCA_000007025.1_ASM702v1	96.9834	4.21759	1240	1415	87.6325
79_GCA_001602635.1_ASM160263v1	69_GCA_000831545.1_ASM83154v1	96.9812	4.42285	1241	1419	87.456
79_GCA_001602635.1_ASM160263v1	70_GCA_000283815.1_ASM28381v1	96.978	4.42926	1241	1415	87.7032
61_GCA_000007025.1_ASM702v1	70_GCA_000283815.1_ASM28381v1	96.977	4.22316	1240	1415	87.6325
64_GCA_000246715.2_ASM24671v2	65_GCA_000283935.1_ASM28393v1	96.9744	4.48072	1243	1415	87.8445
60_GCA_000263055.1_Rho1.0	80_GCA_000263815.1_RcoIs1.0	96.9704	4.40117	1262	1465	86.1433
80_GCA_000263815.1_RcoIs1.0	60_GCA_000263055.1_Rho1.0	96.9667	4.38114	1262	1465	86.1433
49_GCA_000965075.1_ASM96507v1	73_GCA_000283795.1_ASM28379v1	96.9597	4.60178	1260	1414	89.1089
61_GCA_000007025.1_ASM702v1	69_GCA_000831545.1_ASM83154v1	96.9589	4.27567	1242	1415	87.7739
72_GCA_000017445.3_ASM1744v3	49_GCA_000965075.1_ASM96507v1	96.9519	4.61381	1261	1417	88.9908
71_GCA_000283835.1_ASM28383v1	49_GCA_000965075.1_ASM96507v1	96.95	4.59579	1262	1416	89.1243
61_GCA_000007025.1_ASM702v1	73_GCA_000283795.1_ASM28379v1	96.9489	4.46456	1240	1414	87.6945
64_GCA_000246715.2_ASM24671v2	77_GCA_000283955.1_ASM28395v1	96.9462	4.30643	1227	1396	87.894
65_GCA_000283935.1_ASM28393v1	61_GCA_000007025.1_ASM702v1	96.9456	4.93827	1241	1415	87.7032
67_GCA_000261325.1_RcoCa1.0	65_GCA_000283935.1_ASM28393v1	96.9427	4.33033	1247	1415	88.1272
65_GCA_000283935.1_ASM28393v1	66_GCA_000166935.1_ASM16693v1	96.9425	4.73083	1244	1407	88.4151
65_GCA_000283935.1_ASM28393v1	48_GCA_000965145.1_ASM96514v1	96.9421	5.43431	1266	1415	89.47
61_GCA_000007025.1_ASM702v1	68_GCA_000283775.1_ASM28377v1	96.9418	4.46638	1243	1413	87.9689
75_GCA_000018225.1_ASM1822v1	49_GCA_000965075.1_ASM96507v1	96.9382	4.9065	1247	1396	89.3266
70_GCA_000283815.1_ASM28381v1	49_GCA_000965075.1_ASM96507v1	96.9354	4.62463	1261	1415	89.1166
49_GCA_000965075.1_ASM96507v1	75_GCA_000018225.1_ASM1822v1	96.9352	4.91621	1247	1396	89.3266
49_GCA_000965075.1_ASM96507v1	69_GCA_000831545.1_ASM83154v1	96.9341	4.6166	1263	1419	89.0063
68_GCA_000283775.1_ASM28377v1	61_GCA_000007025.1_ASM702v1	96.9338	4.48237	1243	1413	87.9689
61_GCA_000007025.1_ASM702v1	71_GCA_000283835.1_ASM28383v1	96.9309	4.4873	1242	1415	87.7739
76_GCA_000831525.1_ASM83152v1	49_GCA_000965075.1_ASM96507v1	96.9307	4.92927	1247	1396	89.3266
71_GCA_000283835.1_ASM28383v1	61_GCA_000007025.1_ASM702v1	96.9284	4.49966	1242	1415	87.7739
47_GCA_000284195.1_ASM28419v1	65_GCA_000283935.1_ASM28393v1	96.9276	5.4393	1267	1415	89.5406
61_GCA_000007025.1_ASM702v1	65_GCA_000283935.1_ASM28393v1	96.9245	4.9996	1241	1415	87.7032
58_GCA_000283995.1_ASM28399v1	52_GCA_000023005.1_ASM2300v1	96.9239	4.97663	1248	1404	88.8889
74_GCA_000247625.2_ASM24762v2	58_GCA_000283995.1_ASM28399v1	96.9218	4.79275	1240	1404	88.3191
77_GCA_000283955.1_ASM28395v1	48_GCA_000965145.1_ASM96514v1	96.9209	4.83942	1250	1396	89.5415
77_GCA_000283955.1_ASM28395v1	47_GCA_000284195.1_ASM28419v1	96.9199	4.859	1251	1396	89.6132
58_GCA_000283995.1_ASM28399v1	74_GCA_000247625.2_ASM24762v2	96.9181	4.79377	1240	1404	88.3191
77_GCA_000283955.1_ASM28395v1	67_GCA_000261325.1_RcoCa1.0	96.9154	4.22957	1240	1396	88.8252
52_GCA_000023005.1_ASM2300v1	58_GCA_000283995.1_ASM28399v1	96.9103	4.99093	1248	1404	88.8889
68_GCA_000283775.1_ASM28377v1	49_GCA_000965075.1_ASM96507v1	96.909	4.85905	1261	1413	89.2427
47_GCA_000284195.1_ASM28419v1	73_GCA_000283795.1_ASM28379v1	96.9029	4.9065	1262	1414	89.2504
72_GCA_000017445.3_ASM1744v3	47_GCA_000284195.1_ASM28419v1	96.9018	4.8978	1263	1417	89.132
77_GCA_000283955.1_ASM28395v1	66_GCA_000166935.1_ASM16693v1	96.9015	4.68593	1225	1396	87.7507
78_GCA_000257435.1_RcoIn1.0	65_GCA_000283935.1_ASM28393v1	96.897	5.00506	1228	1415	86.7845
73_GCA_000283795.1_ASM28379v1	48_GCA_000965145.1_ASM96514v1	96.8964	4.90011	1261	1414	89.1796
71_GCA_000283835.1_ASM28383v1	47_GCA_000284195.1_ASM28419v1	96.8949	4.90265	1264	1416	89.2655
48_GCA_000965145.1_ASM96514v1	73_GCA_000283795.1_ASM28379v1	96.8949	4.9077	1261	1414	89.1796
72_GCA_000017445.3_ASM1744v3	48_GCA_000965145.1_ASM96514v1	96.8934	4.89914	1262	1417	89.0614
78_GCA_000257435.1_RcoIn1.0	77_GCA_000283955.1_ASM28395v1	96.8921	4.64834	1230	1396	88.1089
71_GCA_000283835.1_ASM28383v1	48_GCA_000965145.1_ASM96514v1	96.8869	4.90384	1263	1416	89.1949
70_GCA_000283815.1_ASM28381v1	47_GCA_000284195.1_ASM28419v1	96.8853	4.9217	1263	1415	89.258
47_GCA_000284195.1_ASM28419v1	69_GCA_000831545.1_ASM83154v1	96.8817	4.91676	1264	1419	89.0768
68_GCA_000283775.1_ASM28377v1	67_GCA_000261325.1_RcoCa1.0	96.8801	4.48948	1250	1413	88.4643
64_GCA_000246715.2_ASM24671v2	68_GCA_000283775.1_ASM28377v1	96.879	4.62158	1237	1413	87.5442
47_GCA_000284195.1_ASM28419v1	76_GCA_000831525.1_ASM83152v1	96.8789	5.20468	1249	1396	89.4699
47_GCA_000284195.1_ASM28419v1	75_GCA_000018225.1_ASM1822v1	96.8779	5.20469	1249	1396	89.4699
77_GCA_000283955.1_ASM28395v1	78_GCA_000257435.1_RcoIn1.0	96.8773	4.68961	1230	1396	88.1089
47_GCA_000284195.1_ASM28419v1	70_GCA_000283815.1_ASM28381v1	96.8773	4.93444	1263	1415	89.258
70_GCA_000283815.1_ASM28381v1	48_GCA_000965145.1_ASM96514v1	96.8772	4.92288	1262	1415	89.1873
69_GCA_000831545.1_ASM83154v1	48_GCA_000965145.1_ASM96514v1	96.8756	4.91146	1264	1419	89.0768
58_GCA_000283995.1_ASM28399v1	60_GCA_000263055.1_Rho1.0	96.8733	4.81564	1263	1404	89.9573
60_GCA_000263055.1_Rho1.0	58_GCA_000283995.1_ASM28399v1	96.873	4.81876	1263	1404	89.9573
76_GCA_000831525.1_ASM83152v1	48_GCA_000965145.1_ASM96514v1	96.8721	5.19892	1248	1396	89.3983
72_GCA_000017445.3_ASM1744v3	67_GCA_000261325.1_RcoCa1.0	96.8717	4.43624	1253	1417	88.4263
75_GCA_000018225.1_ASM1822v1	48_GCA_000965145.1_ASM96514v1	96.8715	5.19896	1248	1396	89.3983
70_GCA_000283815.1_ASM28381v1	67_GCA_000261325.1_RcoCa1.0	96.8706	4.43487	1252	1415	88.4806
48_GCA_000965145.1_ASM96514v1	75_GCA_000018225.1_ASM1822v1	96.87	5.20612	1248	1396	89.3983
73_GCA_000283795.1_ASM28379v1	67_GCA_000261325.1_RcoCa1.0	96.8681	4.44647	1251	1414	88.4724
48_GCA_000965145.1_ASM96514v1	69_GCA_000831545.1_ASM83154v1	96.8679	4.92413	1264	1419	89.0768
65_GCA_000283935.1_ASM28393v1	52_GCA_000023005.1_ASM2300v1	96.8636	4.91679	1237	1415	87.4205
71_GCA_000283835.1_ASM28383v1	67_GCA_000261325.1_RcoCa1.0	96.8624	4.44595	1252	1416	88.4181
78_GCA_000257435.1_RcoIn1.0	76_GCA_000831525.1_ASM83152v1	96.8615	4.82303	1229	1396	88.0372
78_GCA_000257435.1_RcoIn1.0	75_GCA_000018225.1_ASM1822v1	96.8614	4.82288	1229	1396	88.0372
67_GCA_000261325.1_RcoCa1.0	68_GCA_000283775.1_ASM28377v1	96.8562	4.50666	1250	1413	88.4643
78_GCA_000257435.1_RcoIn1.0	73_GCA_000283795.1_ASM28379v1	96.8555	4.81732	1232	1414	87.1287
52_GCA_000023005.1_ASM2300v1	65_GCA_000283935.1_ASM28393v1	96.8534	4.96822	1237	1415	87.4205
63_GCA_000265225.2_ASM26522v2	17_SRR4346295_Gdoso1	96.8529	7.56963	1041	1273	81.7753
76_GCA_000831525.1_ASM83152v1	78_GCA_000257435.1_RcoIn1.0	96.8524	4.85596	1229	1396	88.0372
78_GCA_000257435.1_RcoIn1.0	68_GCA_000283775.1_ASM28377v1	96.8508	4.83698	1234	1413	87.3319
64_GCA_000246715.2_ASM24671v2	76_GCA_000831525.1_ASM83152v1	96.8496	4.92999	1226	1396	87.8223
64_GCA_000246715.2_ASM24671v2	75_GCA_000018225.1_ASM1822v1	96.8489	4.93025	1226	1396	87.8223
69_GCA_000831545.1_ASM83154v1	67_GCA_000261325.1_RcoCa1.0	96.8464	4.4915	1254	1419	88.3721
67_GCA_000261325.1_RcoCa1.0	73_GCA_000283795.1_ASM28379v1	96.8461	4.45975	1251	1414	88.4724
47_GCA_000284195.1_ASM28419v1	68_GCA_000283775.1_ASM28377v1	96.8438	5.16233	1263	1413	89.3843
67_GCA_000261325.1_RcoCa1.0	72_GCA_000017445.3_ASM1744v3	96.8416	4.46287	1253	1417	88.4263
67_GCA_000261325.1_RcoCa1.0	71_GCA_000283835.1_ASM28383v1	96.8405	4.45916	1252	1416	88.4181
67_GCA_000261325.1_RcoCa1.0	70_GCA_000283815.1_ASM28381v1	96.84	4.46182	1252	1415	88.4806
64_GCA_000246715.2_ASM24671v2	73_GCA_000283795.1_ASM28379v1	96.8383	4.79988	1238	1414	87.553
68_GCA_000283775.1_ASM28377v1	47_GCA_000284195.1_ASM28419v1	96.8375	5.17331	1263	1413	89.3843
68_GCA_000283775.1_ASM28377v1	48_GCA_000965145.1_ASM96514v1	96.8369	5.1557	1262	1413	89.3135
78_GCA_000257435.1_RcoIn1.0	71_GCA_000283835.1_ASM28383v1	96.8346	4.84327	1234	1416	87.1469
76_GCA_000831525.1_ASM83152v1	67_GCA_000261325.1_RcoCa1.0	96.8337	4.82612	1240	1396	88.8252
78_GCA_000257435.1_RcoIn1.0	70_GCA_000283815.1_ASM28381v1	96.8334	4.84286	1233	1415	87.1378
75_GCA_000018225.1_ASM1822v1	67_GCA_000261325.1_RcoCa1.0	96.8331	4.82713	1240	1396	88.8252
67_GCA_000261325.1_RcoCa1.0	69_GCA_000831545.1_ASM83154v1	96.8251	4.50422	1254	1419	88.3721
64_GCA_000246715.2_ASM24671v2	72_GCA_000017445.3_ASM1744v3	96.8246	4.80435	1240	1416	87.5706
64_GCA_000246715.2_ASM24671v2	71_GCA_000283835.1_ASM28383v1	96.8245	4.80483	1240	1416	87.5706
64_GCA_000246715.2_ASM24671v2	70_GCA_000283815.1_ASM28381v1	96.8238	4.80857	1239	1415	87.5618
71_GCA_000283835.1_ASM28383v1	78_GCA_000257435.1_RcoIn1.0	96.8209	4.88087	1234	1416	87.1469
72_GCA_000017445.3_ASM1744v3	64_GCA_000246715.2_ASM24671v2	96.8186	4.80942	1240	1416	87.5706
78_GCA_000257435.1_RcoIn1.0	69_GCA_000831545.1_ASM83154v1	96.8145	4.88987	1235	1419	87.0331
77_GCA_000283955.1_ASM28395v1	52_GCA_000023005.1_ASM2300v1	96.8114	4.676	1223	1396	87.6074
67_GCA_000261325.1_RcoCa1.0	75_GCA_000018225.1_ASM1822v1	96.8097	4.84383	1240	1396	88.8252
72_GCA_000017445.3_ASM1744v3	78_GCA_000257435.1_RcoIn1.0	96.8086	4.90893	1235	1417	87.156
64_GCA_000246715.2_ASM24671v2	69_GCA_000831545.1_ASM83154v1	96.804	4.85209	1241	1416	87.6412
72_GCA_000017445.3_ASM1744v3	52_GCA_000023005.1_ASM2300v1	96.7942	4.47212	1238	1417	87.3677
76_GCA_000831525.1_ASM83152v1	52_GCA_000023005.1_ASM2300v1	96.7934	4.70287	1225	1396	87.7507
75_GCA_000018225.1_ASM1822v1	52_GCA_000023005.1_ASM2300v1	96.7929	4.70233	1225	1396	87.7507
70_GCA_000283815.1_ASM28381v1	52_GCA_000023005.1_ASM2300v1	96.7853	4.48768	1238	1415	87.4912
66_GCA_000166935.1_ASM16693v1	75_GCA_000018225.1_ASM1822v1	96.7846	5.40384	1225	1396	87.7507
58_GCA_000283995.1_ASM28399v1	80_GCA_000263815.1_RcoIs1.0	96.7832	5.24529	1230	1404	87.6068
52_GCA_000023005.1_ASM2300v1	72_GCA_000017445.3_ASM1744v3	96.7808	4.49431	1238	1417	87.3677
52_GCA_000023005.1_ASM2300v1	76_GCA_000831525.1_ASM83152v1	96.7778	4.72865	1225	1396	87.7507
52_GCA_000023005.1_ASM2300v1	75_GCA_000018225.1_ASM1822v1	96.7776	4.72761	1225	1396	87.7507
68_GCA_000283775.1_ASM28377v1	66_GCA_000166935.1_ASM16693v1	96.7753	5.14892	1237	1407	87.9176
52_GCA_000023005.1_ASM2300v1	70_GCA_000283815.1_ASM28381v1	96.7733	4.50732	1238	1415	87.4912
75_GCA_000018225.1_ASM1822v1	66_GCA_000166935.1_ASM16693v1	96.7702	5.41285	1225	1396	87.7507
66_GCA_000166935.1_ASM16693v1	73_GCA_000283795.1_ASM28379v1	96.7648	5.28699	1238	1407	87.9886
76_GCA_000831525.1_ASM83152v1	66_GCA_000166935.1_ASM16693v1	96.7628	5.43634	1225	1396	87.7507
60_GCA_000263055.1_Rho1.0	65_GCA_000283935.1_ASM28393v1	96.7563	4.89462	1264	1415	89.3286
65_GCA_000283935.1_ASM28393v1	60_GCA_000263055.1_Rho1.0	96.7555	4.89504	1264	1415	89.3286
73_GCA_000283795.1_ASM28379v1	66_GCA_000166935.1_ASM16693v1	96.7514	5.29476	1238	1407	87.9886
52_GCA_000023005.1_ASM2300v1	69_GCA_000831545.1_ASM83154v1	96.7508	4.55372	1240	1419	87.3855
68_GCA_000283775.1_ASM28377v1	52_GCA_000023005.1_ASM2300v1	96.7481	4.79321	1238	1413	87.615
52_GCA_000023005.1_ASM2300v1	73_GCA_000283795.1_ASM28379v1	96.7476	4.73253	1238	1414	87.553
70_GCA_000283815.1_ASM28381v1	66_GCA_000166935.1_ASM16693v1	96.7466	5.29496	1239	1407	88.0597
71_GCA_000283835.1_ASM28383v1	66_GCA_000166935.1_ASM16693v1	96.7432	5.2937	1240	1407	88.1308
71_GCA_000283835.1_ASM28383v1	52_GCA_000023005.1_ASM2300v1	96.7391	4.72897	1240	1416	87.5706
72_GCA_000017445.3_ASM1744v3	66_GCA_000166935.1_ASM16693v1	96.7362	5.32132	1239	1407	88.0597
52_GCA_000023005.1_ASM2300v1	68_GCA_000283775.1_ASM28377v1	96.7333	4.82021	1238	1413	87.615
66_GCA_000166935.1_ASM16693v1	69_GCA_000831545.1_ASM83154v1	96.7299	5.33263	1241	1407	88.2018
69_GCA_000831545.1_ASM83154v1	66_GCA_000166935.1_ASM16693v1	96.7223	5.33665	1241	1407	88.2018
77_GCA_000283955.1_ASM28395v1	60_GCA_000263055.1_Rho1.0	96.7153	4.89147	1248	1396	89.3983
60_GCA_000263055.1_Rho1.0	75_GCA_000018225.1_ASM1822v1	96.7105	4.90282	1246	1396	89.255
76_GCA_000831525.1_ASM83152v1	60_GCA_000263055.1_Rho1.0	96.7104	4.9029	1246	1396	89.255
75_GCA_000018225.1_ASM1822v1	60_GCA_000263055.1_Rho1.0	96.7089	4.90337	1246	1396	89.255
60_GCA_000263055.1_Rho1.0	68_GCA_000283775.1_ASM28377v1	96.6883	4.98992	1256	1413	88.8889
57_GCA_000302635.2_ASM30263v2	56_GCA_000237845.1_ASM23784v1	96.688	4.20525	1242	1430	86.8531
68_GCA_000283775.1_ASM28377v1	60_GCA_000263055.1_Rho1.0	96.6868	4.99037	1256	1413	88.8889
49_GCA_000965075.1_ASM96507v1	81_SRR5308138_Pfluc4	96.6832	4.86447	1243	1400	88.7857
81_SRR5308138_Pfluc4	49_GCA_000965075.1_ASM96507v1	96.6822	4.86035	1243	1400	88.7857
57_GCA_000302635.2_ASM30263v2	54_GCA_000252365.1_ASM25236v1	96.6773	4.23034	1243	1430	86.9231
81_SRR5308138_Pfluc4	48_GCA_000965145.1_ASM96514v1	96.6742	4.87914	1242	1400	88.7143
47_GCA_000284195.1_ASM28419v1	81_SRR5308138_Pfluc4	96.6718	4.87921	1244	1400	88.8571
79_GCA_001602635.1_ASM160263v1	49_GCA_000965075.1_ASM96507v1	96.6676	4.86732	1238	1419	87.2445
65_GCA_000283935.1_ASM28393v1	74_GCA_000247625.2_ASM24762v2	96.6668	5.79269	1246	1415	88.0565
60_GCA_000263055.1_Rho1.0	73_GCA_000283795.1_ASM28379v1	96.6651	4.97617	1256	1414	88.826
73_GCA_000283795.1_ASM28379v1	60_GCA_000263055.1_Rho1.0	96.6636	4.97673	1256	1414	88.826
77_GCA_000283955.1_ASM28395v1	74_GCA_000247625.2_ASM24762v2	96.6611	5.43787	1232	1396	88.2521
79_GCA_001602635.1_ASM160263v1	48_GCA_000965145.1_ASM96514v1	96.6595	4.88618	1237	1419	87.1741
47_GCA_000284195.1_ASM28419v1	79_GCA_001602635.1_ASM160263v1	96.6559	4.88687	1239	1419	87.315
60_GCA_000263055.1_Rho1.0	71_GCA_000283835.1_ASM28383v1	96.6539	5.00361	1257	1416	88.7712
60_GCA_000263055.1_Rho1.0	72_GCA_000017445.3_ASM1744v3	96.6529	5.0065	1257	1417	88.7085
71_GCA_000283835.1_ASM28383v1	60_GCA_000263055.1_Rho1.0	96.6524	5.00407	1257	1416	88.7712
60_GCA_000263055.1_Rho1.0	70_GCA_000283815.1_ASM28381v1	96.6522	5.01102	1256	1415	88.7633
74_GCA_000247625.2_ASM24762v2	65_GCA_000283935.1_ASM28393v1	96.652	5.84633	1246	1415	88.0565
72_GCA_000017445.3_ASM1744v3	60_GCA_000263055.1_Rho1.0	96.6514	5.00696	1257	1417	88.7085
70_GCA_000283815.1_ASM28381v1	60_GCA_000263055.1_Rho1.0	96.6511	5.01051	1256	1415	88.7633
79_GCA_001602635.1_ASM160263v1	47_GCA_000284195.1_ASM28419v1	96.6508	4.89081	1239	1419	87.315
53_GCA_000283595.1_ASM28359v1	56_GCA_000237845.1_ASM23784v1	96.6417	4.44828	1244	1436	86.6295
53_GCA_000283595.1_ASM28359v1	54_GCA_000252365.1_ASM25236v1	96.6347	4.46413	1245	1436	86.6992
60_GCA_000263055.1_Rho1.0	69_GCA_000831545.1_ASM83154v1	96.6347	5.03718	1258	1419	88.654
69_GCA_000831545.1_ASM83154v1	60_GCA_000263055.1_Rho1.0	96.6332	5.03762	1258	1419	88.654
74_GCA_000247625.2_ASM24762v2	68_GCA_000283775.1_ASM28377v1	96.6187	5.62486	1244	1413	88.0396
68_GCA_000283775.1_ASM28377v1	74_GCA_000247625.2_ASM24762v2	96.6185	5.62015	1244	1413	88.0396
74_GCA_000247625.2_ASM24762v2	76_GCA_000831525.1_ASM83152v1	96.582	5.95264	1230	1396	88.1089
76_GCA_000831525.1_ASM83152v1	74_GCA_000247625.2_ASM24762v2	96.5818	5.94817	1230	1396	88.1089
74_GCA_000247625.2_ASM24762v2	75_GCA_000018225.1_ASM1822v1	96.5814	5.95435	1230	1396	88.1089
75_GCA_000018225.1_ASM1822v1	74_GCA_000247625.2_ASM24762v2	96.5812	5.94989	1230	1396	88.1089
65_GCA_000283935.1_ASM28393v1	80_GCA_000263815.1_RcoIs1.0	96.5649	6.06433	1230	1415	86.9258
74_GCA_000247625.2_ASM24762v2	73_GCA_000283795.1_ASM28379v1	96.5559	5.87821	1244	1414	87.9774
71_GCA_000283835.1_ASM28383v1	74_GCA_000247625.2_ASM24762v2	96.543	5.88178	1245	1416	87.9237
74_GCA_000247625.2_ASM24762v2	70_GCA_000283815.1_ASM28381v1	96.5419	5.88911	1244	1415	87.9152
70_GCA_000283815.1_ASM28381v1	74_GCA_000247625.2_ASM24762v2	96.5412	5.88464	1244	1415	87.9152
74_GCA_000247625.2_ASM24762v2	72_GCA_000017445.3_ASM1744v3	96.5402	5.88674	1245	1417	87.8617
72_GCA_000017445.3_ASM1744v3	74_GCA_000247625.2_ASM24762v2	96.5394	5.88219	1245	1417	87.8617
81_SRR5308138_Pfluc4	67_GCA_000261325.1_RcoCa1.0	96.533	4.26596	1231	1400	87.9286
77_GCA_000283955.1_ASM28395v1	80_GCA_000263815.1_RcoIs1.0	96.5179	6.03903	1220	1396	87.3926
74_GCA_000247625.2_ASM24762v2	69_GCA_000831545.1_ASM83154v1	96.5137	5.92848	1247	1419	87.8788
80_GCA_000263815.1_RcoIs1.0	77_GCA_000283955.1_ASM28395v1	96.513	6.03068	1220	1396	87.3926
79_GCA_001602635.1_ASM160263v1	67_GCA_000261325.1_RcoCa1.0	96.4988	4.43723	1229	1419	86.6103
81_SRR5308138_Pfluc4	60_GCA_000263055.1_Rho1.0	96.4487	4.59208	1238	1400	88.4286
10_SRR5909600_Psono2	3_Ricimp-plasmids	96.4461	9.53078	1116	1407	79.3177
81_SRR5308138_Pfluc4	78_GCA_000257435.1_RcoIn1.0	96.4458	5.41864	1218	1400	87
3_Ricimp-plasmids	10_SRR5909600_Psono2	96.442	9.46297	1116	1407	79.3177
81_SRR5308138_Pfluc4	66_GCA_000166935.1_ASM16693v1	96.4403	5.06593	1233	1400	88.0714
78_GCA_000257435.1_RcoIn1.0	81_SRR5308138_Pfluc4	96.4399	5.46286	1218	1400	87
81_SRR5308138_Pfluc4	61_GCA_000007025.1_ASM702v1	96.4266	5.46745	1228	1400	87.7143
68_GCA_000283775.1_ASM28377v1	80_GCA_000263815.1_RcoIs1.0	96.4239	6.51312	1233	1413	87.2611
79_GCA_001602635.1_ASM160263v1	78_GCA_000257435.1_RcoIn1.0	96.4215	5.53532	1215	1419	85.6237
73_GCA_000283795.1_ASM28379v1	80_GCA_000263815.1_RcoIs1.0	96.4215	6.45518	1233	1414	87.1994
70_GCA_000283815.1_ASM28381v1	80_GCA_000263815.1_RcoIs1.0	96.4177	6.46326	1234	1415	87.2085
64_GCA_000246715.2_ASM24671v2	81_SRR5308138_Pfluc4	96.4175	5.09102	1235	1400	88.2143
80_GCA_000263815.1_RcoIs1.0	73_GCA_000283795.1_ASM28379v1	96.4167	6.44736	1233	1414	87.1994
72_GCA_000017445.3_ASM1744v3	80_GCA_000263815.1_RcoIs1.0	96.4159	6.46061	1235	1417	87.156
78_GCA_000257435.1_RcoIn1.0	79_GCA_001602635.1_ASM160263v1	96.4146	5.58219	1215	1419	85.6237
76_GCA_000831525.1_ASM83152v1	80_GCA_000263815.1_RcoIs1.0	96.4141	6.49619	1224	1396	87.6791
75_GCA_000018225.1_ASM1822v1	80_GCA_000263815.1_RcoIs1.0	96.4133	6.49625	1224	1396	87.6791
61_GCA_000007025.1_ASM702v1	81_SRR5308138_Pfluc4	96.411	5.5197	1228	1400	87.7143
52_GCA_000023005.1_ASM2300v1	81_SRR5308138_Pfluc4	96.4108	5.02291	1223	1400	87.3571
80_GCA_000263815.1_RcoIs1.0	76_GCA_000831525.1_ASM83152v1	96.4092	6.48838	1224	1396	87.6791
71_GCA_000283835.1_ASM28383v1	80_GCA_000263815.1_RcoIs1.0	96.4088	6.47245	1234	1416	87.1469
80_GCA_000263815.1_RcoIs1.0	75_GCA_000018225.1_ASM1822v1	96.4084	6.48844	1224	1396	87.6791
64_GCA_000246715.2_ASM24671v2	79_GCA_001602635.1_ASM160263v1	96.4055	5.09553	1233	1416	87.0763
79_GCA_001602635.1_ASM160263v1	61_GCA_000007025.1_ASM702v1	96.403	5.57894	1226	1415	86.6431
81_SRR5308138_Pfluc4	52_GCA_000023005.1_ASM2300v1	96.4013	5.03243	1223	1400	87.3571
69_GCA_000831545.1_ASM83154v1	80_GCA_000263815.1_RcoIs1.0	96.4007	6.47242	1236	1419	87.1036
79_GCA_001602635.1_ASM160263v1	64_GCA_000246715.2_ASM24671v2	96.4001	5.09355	1233	1416	87.0763
80_GCA_000263815.1_RcoIs1.0	69_GCA_000831545.1_ASM83154v1	96.3958	6.46466	1236	1419	87.1036
79_GCA_001602635.1_ASM160263v1	60_GCA_000263055.1_Rho1.0	96.3891	4.85666	1238	1419	87.2445
79_GCA_001602635.1_ASM160263v1	52_GCA_000023005.1_ASM2300v1	96.3889	5.03628	1218	1419	85.8351
79_GCA_001602635.1_ASM160263v1	66_GCA_000166935.1_ASM16693v1	96.3832	5.31301	1231	1407	87.4911
74_GCA_000247625.2_ASM24762v2	81_SRR5308138_Pfluc4	96.3583	5.25609	1227	1400	87.6429
81_SRR5308138_Pfluc4	74_GCA_000247625.2_ASM24762v2	96.3561	5.252	1227	1400	87.6429
79_GCA_001602635.1_ASM160263v1	74_GCA_000247625.2_ASM24762v2	96.3459	5.25666	1223	1419	86.1875
24_GCA_000965185.1_ASM96518v1	56_GCA_000237845.1_ASM23784v1	96.3443	5.25983	1242	1442	86.1304
24_GCA_000965185.1_ASM96518v1	54_GCA_000252365.1_ASM25236v1	96.3316	5.28787	1243	1441	86.2595
56_GCA_000237845.1_ASM23784v1	55_GCA_000221205.1_ASM22120v1	96.2669	5.7148	1247	1437	86.778
54_GCA_000252365.1_ASM25236v1	55_GCA_000221205.1_ASM22120v1	96.2605	5.74829	1247	1437	86.778
80_GCA_000263815.1_RcoIs1.0	81_SRR5308138_Pfluc4	96.2452	5.46516	1213	1400	86.6429
81_SRR5308138_Pfluc4	80_GCA_000263815.1_RcoIs1.0	96.243	5.46138	1213	1400	86.6429
53_GCA_000283595.1_ASM28359v1	60_GCA_000263055.1_Rho1.0	96.2327	4.9499	1234	1436	85.9331
80_GCA_000263815.1_RcoIs1.0	79_GCA_001602635.1_ASM160263v1	96.2223	5.59236	1211	1419	85.3418
79_GCA_001602635.1_ASM160263v1	80_GCA_000263815.1_RcoIs1.0	96.221	5.58527	1211	1419	85.3418
57_GCA_000302635.2_ASM30263v2	60_GCA_000263055.1_Rho1.0	96.1981	5.15853	1235	1430	86.3636
57_GCA_000302635.2_ASM30263v2	39_GCA_000021525.1_ASM2152v1	96.1584	6.02291	1194	1430	83.4965
53_GCA_000283595.1_ASM28359v1	39_GCA_000021525.1_ASM2152v1	96.1261	6.03081	1194	1436	83.1476
17_SRR4346295_Gdoso1	40_SRR2939026_Blapp1	96.1233	8.30445	1089	1324	82.2508
40_SRR2939026_Blapp1	17_SRR4346295_Gdoso1	96.1162	8.34808	1089	1324	82.2508
57_GCA_000302635.2_ASM30263v2	78_GCA_000257435.1_RcoIn1.0	96.0916	5.44477	1207	1430	84.4056
78_GCA_000257435.1_RcoIn1.0	57_GCA_000302635.2_ASM30263v2	96.0871	5.46106	1207	1430	84.4056
57_GCA_000302635.2_ASM30263v2	61_GCA_000007025.1_ASM702v1	96.0681	5.50767	1215	1415	85.8657
61_GCA_000007025.1_ASM702v1	57_GCA_000302635.2_ASM30263v2	96.0649	5.52517	1215	1415	85.8657
53_GCA_000283595.1_ASM28359v1	78_GCA_000257435.1_RcoIn1.0	96.059	5.49757	1204	1436	83.844
53_GCA_000283595.1_ASM28359v1	61_GCA_000007025.1_ASM702v1	96.0368	5.53049	1217	1415	86.0071
57_GCA_000302635.2_ASM30263v2	49_GCA_000965075.1_ASM96507v1	95.9849	5.96527	1234	1430	86.2937
57_GCA_000302635.2_ASM30263v2	48_GCA_000965145.1_ASM96514v1	95.9844	5.96221	1233	1430	86.2238
57_GCA_000302635.2_ASM30263v2	47_GCA_000284195.1_ASM28419v1	95.9829	5.95727	1236	1430	86.4336
64_GCA_000246715.2_ASM24671v2	57_GCA_000302635.2_ASM30263v2	95.9768	5.61799	1217	1416	85.9463
53_GCA_000283595.1_ASM28359v1	49_GCA_000965075.1_ASM96507v1	95.9684	5.99212	1235	1436	86.0028
53_GCA_000283595.1_ASM28359v1	47_GCA_000284195.1_ASM28419v1	95.9676	5.98707	1236	1436	86.0724
53_GCA_000283595.1_ASM28359v1	48_GCA_000965145.1_ASM96514v1	95.9634	5.98675	1235	1436	86.0028
64_GCA_000246715.2_ASM24671v2	53_GCA_000283595.1_ASM28359v1	95.9607	5.61317	1216	1416	85.8757
53_GCA_000283595.1_ASM28359v1	64_GCA_000246715.2_ASM24671v2	95.9555	5.61703	1216	1416	85.8757
57_GCA_000302635.2_ASM30263v2	66_GCA_000166935.1_ASM16693v1	95.9268	5.90439	1213	1407	86.2118
57_GCA_000302635.2_ASM30263v2	67_GCA_000261325.1_RcoCa1.0	95.9126	5.53585	1236	1430	86.4336
53_GCA_000283595.1_ASM28359v1	66_GCA_000166935.1_ASM16693v1	95.9123	5.90678	1214	1407	86.2829
67_GCA_000261325.1_RcoCa1.0	57_GCA_000302635.2_ASM30263v2	95.9064	5.52557	1236	1430	86.4336
53_GCA_000283595.1_ASM28359v1	67_GCA_000261325.1_RcoCa1.0	95.8968	5.53007	1231	1436	85.7242
39_GCA_000021525.1_ASM2152v1	55_GCA_000221205.1_ASM22120v1	95.8562	6.64706	1199	1437	83.4377
47_GCA_000284195.1_ASM28419v1	55_GCA_000221205.1_ASM22120v1	95.8556	6.25216	1239	1437	86.2213
55_GCA_000221205.1_ASM22120v1	48_GCA_000965145.1_ASM96514v1	95.8541	6.23557	1238	1437	86.1517
49_GCA_000965075.1_ASM96507v1	55_GCA_000221205.1_ASM22120v1	95.8505	6.27571	1237	1437	86.0821
48_GCA_000965145.1_ASM96514v1	55_GCA_000221205.1_ASM22120v1	95.8449	6.25388	1238	1437	86.1517
57_GCA_000302635.2_ASM30263v2	58_GCA_000283995.1_ASM28399v1	95.8346	5.03161	1205	1404	85.8262
34_GCA_000485845.1_RicGra1.0	56_GCA_000237845.1_ASM23784v1	95.8308	5.25586	1237	1442	85.7836
34_GCA_000485845.1_RicGra1.0	54_GCA_000252365.1_ASM25236v1	95.8261	5.28249	1237	1441	85.8432
55_GCA_000221205.1_ASM22120v1	60_GCA_000263055.1_Rho1.0	95.8248	6.10658	1241	1437	86.3605
60_GCA_000263055.1_Rho1.0	55_GCA_000221205.1_ASM22120v1	95.8223	6.08539	1241	1437	86.3605
24_GCA_000965185.1_ASM96518v1	60_GCA_000263055.1_Rho1.0	95.8194	6.01076	1237	1465	84.4369
57_GCA_000302635.2_ASM30263v2	52_GCA_000023005.1_ASM2300v1	95.8176	5.88986	1217	1430	85.1049
61_GCA_000007025.1_ASM702v1	24_GCA_000965185.1_ASM96518v1	95.8108	5.9073	1216	1415	85.9364
57_GCA_000302635.2_ASM30263v2	74_GCA_000247625.2_ASM24762v2	95.8037	6.4246	1222	1430	85.4545
53_GCA_000283595.1_ASM28359v1	52_GCA_000023005.1_ASM2300v1	95.7979	5.90705	1218	1436	84.8189
53_GCA_000283595.1_ASM28359v1	74_GCA_000247625.2_ASM24762v2	95.7863	6.42748	1220	1436	84.9582
78_GCA_000257435.1_RcoIn1.0	24_GCA_000965185.1_ASM96518v1	95.7705	6.15342	1207	1438	83.936
67_GCA_000261325.1_RcoCa1.0	24_GCA_000965185.1_ASM96518v1	95.7528	5.65165	1227	1489	82.4043
53_GCA_000283595.1_ASM28359v1	58_GCA_000283995.1_ASM28399v1	95.751	5.29843	1205	1404	85.8262
44_GCA_001051325.1_Rickettsia_aeschlimannii	46_GCA_000284075.1_ASM28407v1	95.7439	5.83249	1194	1482	80.5668
46_GCA_000284075.1_ASM28407v1	44_GCA_001051325.1_Rickettsia_aeschlimannii	95.7361	5.83935	1194	1482	80.5668
61_GCA_000007025.1_ASM702v1	55_GCA_000221205.1_ASM22120v1	95.7327	6.51946	1219	1415	86.1484
64_GCA_000246715.2_ASM24671v2	55_GCA_000221205.1_ASM22120v1	95.7307	6.35751	1214	1416	85.7345
64_GCA_000246715.2_ASM24671v2	24_GCA_000965185.1_ASM96518v1	95.729	6.05556	1214	1416	85.7345
78_GCA_000257435.1_RcoIn1.0	55_GCA_000221205.1_ASM22120v1	95.7254	6.53489	1206	1437	83.9248
56_GCA_000237845.1_ASM23784v1	42_GCA_000284175.1_ASM28417v1	95.7178	5.8234	1179	1391	84.7592
24_GCA_000965185.1_ASM96518v1	74_GCA_000247625.2_ASM24762v2	95.7169	5.85887	1218	1448	84.116
54_GCA_000252365.1_ASM25236v1	42_GCA_000284175.1_ASM28417v1	95.7113	5.83207	1179	1391	84.7592
57_GCA_000302635.2_ASM30263v2	65_GCA_000283935.1_ASM28393v1	95.7073	5.44739	1197	1415	84.5936
30_MegCarteria	4_MegNEIS296	95.7055	9.72377	1069	1316	81.231
24_GCA_000965185.1_ASM96518v1	47_GCA_000284195.1_ASM28419v1	95.6887	6.35508	1255	1440	87.1528
24_GCA_000965185.1_ASM96518v1	48_GCA_000965145.1_ASM96514v1	95.6841	6.36696	1252	1440	86.9444
24_GCA_000965185.1_ASM96518v1	66_GCA_000166935.1_ASM16693v1	95.6838	6.41395	1208	1407	85.8564
24_GCA_000965185.1_ASM96518v1	49_GCA_000965075.1_ASM96507v1	95.6834	6.3825	1253	1441	86.9535
57_GCA_000302635.2_ASM30263v2	80_GCA_000263815.1_RcoIs1.0	95.6749	6.38498	1218	1430	85.1748
52_GCA_000023005.1_ASM2300v1	55_GCA_000221205.1_ASM22120v1	95.6725	6.25318	1215	1437	84.5511
66_GCA_000166935.1_ASM16693v1	55_GCA_000221205.1_ASM22120v1	95.6631	6.69464	1212	1407	86.1407
53_GCA_000283595.1_ASM28359v1	80_GCA_000263815.1_RcoIs1.0	95.6585	6.38445	1214	1436	84.5404
17_SRR4346295_Gdoso1	32_SRR5088467_Drufa1	95.6542	6.45015	1191	1408	84.5881
55_GCA_000221205.1_ASM22120v1	66_GCA_000166935.1_ASM16693v1	95.6519	6.70061	1212	1407	86.1407
71_GCA_000283835.1_ASM28383v1	57_GCA_000302635.2_ASM30263v2	95.6464	5.54572	1200	1416	84.7458
32_SRR5088467_Drufa1	17_SRR4346295_Gdoso1	95.6417	6.47412	1191	1408	84.5881
57_GCA_000302635.2_ASM30263v2	71_GCA_000283835.1_ASM28383v1	95.6376	5.57641	1200	1416	84.7458
57_GCA_000302635.2_ASM30263v2	73_GCA_000283795.1_ASM28379v1	95.6365	5.58746	1199	1414	84.7949
22_GCA_001442475.1_ASM144247v1	42_GCA_000284175.1_ASM28417v1	95.6302	6.39177	1189	1391	85.4781
72_GCA_000017445.3_ASM1744v3	57_GCA_000302635.2_ASM30263v2	95.6285	5.58509	1200	1417	84.686
77_GCA_000283955.1_ASM28395v1	57_GCA_000302635.2_ASM30263v2	95.6242	5.71867	1193	1396	85.4585
57_GCA_000302635.2_ASM30263v2	70_GCA_000283815.1_ASM28381v1	95.6221	5.61955	1199	1415	84.735
57_GCA_000302635.2_ASM30263v2	69_GCA_000831545.1_ASM83154v1	95.6204	5.61197	1200	1419	84.5666
57_GCA_000302635.2_ASM30263v2	72_GCA_000017445.3_ASM1744v3	95.6187	5.61855	1200	1417	84.686
24_GCA_000965185.1_ASM96518v1	80_GCA_000263815.1_RcoIs1.0	95.6163	6.31643	1201	1489	80.6582
57_GCA_000302635.2_ASM30263v2	77_GCA_000283955.1_ASM28395v1	95.6144	5.72457	1193	1396	85.4585
55_GCA_000221205.1_ASM22120v1	67_GCA_000261325.1_RcoCa1.0	95.6137	6.57122	1227	1437	85.3862
24_GCA_000965185.1_ASM96518v1	58_GCA_000283995.1_ASM28399v1	95.6099	5.47851	1205	1404	85.8262
67_GCA_000261325.1_RcoCa1.0	55_GCA_000221205.1_ASM22120v1	95.6097	6.55578	1227	1437	85.3862
53_GCA_000283595.1_ASM28359v1	65_GCA_000283935.1_ASM28393v1	95.5997	5.81543	1199	1415	84.735
75_GCA_000018225.1_ASM1822v1	57_GCA_000302635.2_ASM30263v2	95.5952	5.85942	1193	1396	85.4585
57_GCA_000302635.2_ASM30263v2	76_GCA_000831525.1_ASM83152v1	95.5884	5.85059	1193	1396	85.4585
57_GCA_000302635.2_ASM30263v2	75_GCA_000018225.1_ASM1822v1	95.5884	5.85191	1193	1396	85.4585
42_GCA_000284175.1_ASM28417v1	46_GCA_000284075.1_ASM28407v1	95.5869	6.19089	1180	1391	84.8311
57_GCA_000302635.2_ASM30263v2	68_GCA_000283775.1_ASM28377v1	95.5851	5.89409	1199	1413	84.8549
24_GCA_000965185.1_ASM96518v1	39_GCA_000021525.1_ASM2152v1	95.5574	7.42997	1221	1512	80.754
8_GCA_000018245.1_ASM1824v1	14_SRR5168443_Sanch3	95.5571	9.30428	1183	1565	75.5911
14_SRR5168443_Sanch3	8_GCA_000018245.1_ASM1824v1	95.5534	9.29557	1183	1565	75.5911
46_GCA_000284075.1_ASM28407v1	42_GCA_000284175.1_ASM28417v1	95.5495	6.23016	1180	1391	84.8311
39_GCA_000021525.1_ASM2152v1	24_GCA_000965185.1_ASM96518v1	95.5479	7.4441	1221	1512	80.754
62_GCA_000964905.1_ASM96490v1	42_GCA_000284175.1_ASM28417v1	95.547	5.61087	1166	1391	83.8246
53_GCA_000283595.1_ASM28359v1	73_GCA_000283795.1_ASM28379v1	95.5423	5.82568	1201	1414	84.9364
53_GCA_000283595.1_ASM28359v1	71_GCA_000283835.1_ASM28383v1	95.5386	5.82092	1202	1416	84.887
72_GCA_000017445.3_ASM1744v3	53_GCA_000283595.1_ASM28359v1	95.5359	5.82846	1201	1417	84.7565
44_GCA_001051325.1_Rickettsia_aeschlimannii	59_GCA_000283855.1_ASM28385v1	95.5349	6.21268	1176	1433	82.0656
53_GCA_000283595.1_ASM28359v1	77_GCA_000283955.1_ASM28395v1	95.5324	5.9546	1194	1396	85.5301
63_GCA_000265225.2_ASM26522v2	40_SRR2939026_Blapp1	95.5316	10.2734	987	1273	77.5334
53_GCA_000283595.1_ASM28359v1	72_GCA_000017445.3_ASM1744v3	95.5306	5.85192	1201	1417	84.7565
53_GCA_000283595.1_ASM28359v1	70_GCA_000283815.1_ASM28381v1	95.5237	5.86086	1201	1415	84.8763
22_GCA_001442475.1_ASM144247v1	44_GCA_001051325.1_Rickettsia_aeschlimannii	95.5232	6.43539	1209	1504	80.3856
57_GCA_000302635.2_ASM30263v2	34_GCA_000485845.1_RicGra1.0	95.5193	5.35471	1239	1430	86.6434
53_GCA_000283595.1_ASM28359v1	69_GCA_000831545.1_ASM83154v1	95.5087	5.8665	1203	1419	84.778
58_GCA_000283995.1_ASM28399v1	55_GCA_000221205.1_ASM22120v1	95.5043	6.29395	1210	1404	86.1823
53_GCA_000283595.1_ASM28359v1	34_GCA_000485845.1_RicGra1.0	95.5032	5.36378	1238	1436	86.2117
14_SRR5168443_Sanch3	9_GCA_000012385.1_ASM1238v1	95.5025	9.35409	1187	1503	78.9754
9_GCA_000012385.1_ASM1238v1	14_SRR5168443_Sanch3	95.4993	9.38266	1187	1503	78.9754
62_GCA_000964905.1_ASM96490v1	44_GCA_001051325.1_Rickettsia_aeschlimannii	95.4982	6.74816	1164	1419	82.0296
55_GCA_000221205.1_ASM22120v1	80_GCA_000263815.1_RcoIs1.0	95.4943	6.75325	1205	1437	83.8553
80_GCA_000263815.1_RcoIs1.0	55_GCA_000221205.1_ASM22120v1	95.49	6.76254	1205	1437	83.8553
53_GCA_000283595.1_ASM28359v1	75_GCA_000018225.1_ASM1822v1	95.4882	6.08727	1195	1396	85.6017
53_GCA_000283595.1_ASM28359v1	76_GCA_000831525.1_ASM83152v1	95.4881	6.08698	1195	1396	85.6017
53_GCA_000283595.1_ASM28359v1	68_GCA_000283775.1_ASM28377v1	95.4847	6.12805	1201	1413	84.9965
74_GCA_000247625.2_ASM24762v2	55_GCA_000221205.1_ASM22120v1	95.4844	7.03024	1220	1437	84.8991
33_GCA_000016625.1_ASM1662v1	42_GCA_000284175.1_ASM28417v1	95.4827	6.12303	1216	1391	87.4191
42_GCA_000284175.1_ASM28417v1	33_GCA_000016625.1_ASM1662v1	95.4725	6.17026	1216	1391	87.4191
17_SRR4346295_Gdoso1	35_SRR3161968_Choog2	95.4697	6.60051	1182	1408	83.9489
46_GCA_000284075.1_ASM28407v1	56_GCA_000237845.1_ASM23784v1	95.4679	5.79186	1188	1442	82.3856
46_GCA_000284075.1_ASM28407v1	54_GCA_000252365.1_ASM25236v1	95.4621	5.81033	1188	1441	82.4427
35_SRR3161968_Choog2	17_SRR4346295_Gdoso1	95.4575	6.63543	1182	1408	83.9489
63_GCA_000265225.2_ASM26522v2	32_SRR5088467_Drufa1	95.4514	8.42762	1035	1273	81.304
44_GCA_001051325.1_Rickettsia_aeschlimannii	33_GCA_000016625.1_ASM1662v1	95.4461	6.3997	1230	1504	81.7819
59_GCA_000283855.1_ASM28385v1	42_GCA_000284175.1_ASM28417v1	95.4315	6.22	1168	1391	83.9684
53_GCA_000283595.1_ASM28359v1	42_GCA_000284175.1_ASM28417v1	95.4195	6.48069	1184	1391	85.1186
34_GCA_000485845.1_RicGra1.0	55_GCA_000221205.1_ASM22120v1	95.4066	5.39391	1246	1437	86.7084
57_GCA_000302635.2_ASM30263v2	42_GCA_000284175.1_ASM28417v1	95.404	6.63652	1185	1391	85.1905
62_GCA_000964905.1_ASM96490v1	34_GCA_000485845.1_RicGra1.0	95.395	5.87752	1197	1419	84.3552
42_GCA_000284175.1_ASM28417v1	60_GCA_000263055.1_Rho1.0	95.3896	5.81228	1176	1391	84.5435
34_GCA_000485845.1_RicGra1.0	60_GCA_000263055.1_Rho1.0	95.3859	5.52506	1234	1465	84.2321
24_GCA_000965185.1_ASM96518v1	52_GCA_000023005.1_ASM2300v1	95.3821	6.94531	1229	1437	85.5254
65_GCA_000283935.1_ASM28393v1	55_GCA_000221205.1_ASM22120v1	95.379	6.41066	1206	1415	85.2297
25_GCA_000964675.1_ASM96467v1	42_GCA_000284175.1_ASM28417v1	95.3621	6.36354	1207	1391	86.7721
56_GCA_000237845.1_ASM23784v1	22_GCA_001442475.1_ASM144247v1	95.3603	6.10569	1186	1442	82.2469
20_SRR2939019_Btrans1	9_GCA_000012385.1_ASM1238v1	95.3599	9.77232	1143	1503	76.0479
46_GCA_000284075.1_ASM28407v1	34_GCA_000485845.1_RicGra1.0	95.359	6.40448	1235	1482	83.3333
9_GCA_000012385.1_ASM1238v1	20_SRR2939019_Btrans1	95.3579	9.78698	1143	1503	76.0479
54_GCA_000252365.1_ASM25236v1	22_GCA_001442475.1_ASM144247v1	95.3548	6.12374	1186	1441	82.304
24_GCA_000965185.1_ASM96518v1	68_GCA_000283775.1_ASM28377v1	95.3488	6.1032	1200	1413	84.9257
34_GCA_000485845.1_RicGra1.0	61_GCA_000007025.1_ASM702v1	95.3434	5.81682	1205	1415	85.159
57_GCA_000302635.2_ASM30263v2	46_GCA_000284075.1_ASM28407v1	95.3404	6.09577	1190	1430	83.2168
14_SRR5168443_Sanch3	7_GCA_000965005.1_ASM96500v1	95.3398	9.83339	1187	1515	78.3498
34_GCA_000485845.1_RicGra1.0	46_GCA_000284075.1_ASM28407v1	95.3372	6.43283	1235	1482	83.3333
7_GCA_000965005.1_ASM96500v1	14_SRR5168443_Sanch3	95.335	9.84768	1187	1515	78.3498
34_GCA_000485845.1_RicGra1.0	42_GCA_000284175.1_ASM28417v1	95.3348	7.10876	1235	1391	88.785
42_GCA_000284175.1_ASM28417v1	61_GCA_000007025.1_ASM702v1	95.3303	6.06209	1160	1391	83.3932
42_GCA_000284175.1_ASM28417v1	34_GCA_000485845.1_RicGra1.0	95.3296	7.13066	1235	1391	88.785
24_GCA_000965185.1_ASM96518v1	77_GCA_000283955.1_ASM28395v1	95.3219	6.2001	1197	1396	85.745
39_GCA_000021525.1_ASM2152v1	42_GCA_000284175.1_ASM28417v1	95.3139	6.71659	1156	1391	83.1057
42_GCA_000284175.1_ASM28417v1	78_GCA_000257435.1_RcoIn1.0	95.3118	5.82612	1151	1391	82.7462
53_GCA_000283595.1_ASM28359v1	46_GCA_000284075.1_ASM28407v1	95.3017	6.11558	1192	1436	83.0084
24_GCA_000965185.1_ASM96518v1	76_GCA_000831525.1_ASM83152v1	95.3009	6.21887	1198	1396	85.8166
75_GCA_000018225.1_ASM1822v1	24_GCA_000965185.1_ASM96518v1	95.2991	6.20922	1198	1396	85.8166
77_GCA_000283955.1_ASM28395v1	55_GCA_000221205.1_ASM22120v1	95.292	6.60054	1201	1396	86.0315
23_GCA_001273795.1_ASM127379v1	42_GCA_000284175.1_ASM28417v1	95.2914	6.24231	1209	1391	86.9159
55_GCA_000221205.1_ASM22120v1	73_GCA_000283795.1_ASM28379v1	95.2873	6.55907	1207	1414	85.3607
78_GCA_000257435.1_RcoIn1.0	34_GCA_000485845.1_RicGra1.0	95.2839	5.98662	1203	1438	83.6579
24_GCA_000965185.1_ASM96518v1	65_GCA_000283935.1_ASM28393v1	95.2817	6.60984	1200	1415	84.8057
55_GCA_000221205.1_ASM22120v1	75_GCA_000018225.1_ASM1822v1	95.2809	6.62564	1202	1396	86.1032
49_GCA_000965075.1_ASM96507v1	34_GCA_000485845.1_RicGra1.0	95.2764	6.52594	1217	1441	84.4552
34_GCA_000485845.1_RicGra1.0	49_GCA_000965075.1_ASM96507v1	95.274	6.5168	1217	1441	84.4552
47_GCA_000284195.1_ASM28419v1	34_GCA_000485845.1_RicGra1.0	95.2735	6.53419	1217	1440	84.5139
44_GCA_001051325.1_Rickettsia_aeschlimannii	42_GCA_000284175.1_ASM28417v1	95.2732	6.85951	1171	1391	84.184
32_SRR5088467_Drufa1	40_SRR2939026_Blapp1	95.2706	8.31239	1088	1324	82.1752
40_SRR2939026_Blapp1	32_SRR5088467_Drufa1	95.2706	8.32438	1088	1324	82.1752
76_GCA_000831525.1_ASM83152v1	55_GCA_000221205.1_ASM22120v1	95.2686	6.65478	1202	1396	86.1032
73_GCA_000283795.1_ASM28379v1	55_GCA_000221205.1_ASM22120v1	95.2685	6.60545	1207	1414	85.3607
75_GCA_000018225.1_ASM1822v1	55_GCA_000221205.1_ASM22120v1	95.2672	6.65523	1202	1396	86.1032
48_GCA_000965145.1_ASM96514v1	34_GCA_000485845.1_RicGra1.0	95.2661	6.527	1216	1440	84.4444
42_GCA_000284175.1_ASM28417v1	44_GCA_001051325.1_Rickettsia_aeschlimannii	95.2648	6.90267	1171	1391	84.184
80_GCA_000263815.1_RcoIs1.0	34_GCA_000485845.1_RicGra1.0	95.2634	5.70585	1203	1489	80.7925
34_GCA_000485845.1_RicGra1.0	47_GCA_000284195.1_ASM28419v1	95.2592	6.54224	1217	1440	84.5139
57_GCA_000302635.2_ASM30263v2	81_SRR5308138_Pfluc4	95.2566	5.52858	1191	1400	85.0714
79_GCA_001602635.1_ASM160263v1	57_GCA_000302635.2_ASM30263v2	95.2529	5.53629	1188	1419	83.7209
64_GCA_000246715.2_ASM24671v2	42_GCA_000284175.1_ASM28417v1	95.2516	6.18039	1168	1391	83.9684
34_GCA_000485845.1_RicGra1.0	48_GCA_000965145.1_ASM96514v1	95.2497	6.5408	1216	1440	84.4444
57_GCA_000302635.2_ASM30263v2	79_GCA_001602635.1_ASM160263v1	95.2448	5.52648	1188	1419	83.7209
72_GCA_000017445.3_ASM1744v3	55_GCA_000221205.1_ASM22120v1	95.2406	6.70309	1208	1417	85.2505
68_GCA_000283775.1_ASM28377v1	55_GCA_000221205.1_ASM22120v1	95.2379	6.80744	1210	1413	85.6334
71_GCA_000283835.1_ASM28383v1	55_GCA_000221205.1_ASM22120v1	95.2374	6.69851	1209	1416	85.3814
69_GCA_000831545.1_ASM83154v1	55_GCA_000221205.1_ASM22120v1	95.2365	6.69985	1209	1419	85.2008
55_GCA_000221205.1_ASM22120v1	69_GCA_000831545.1_ASM83154v1	95.233	6.70009	1209	1419	85.2008
54_GCA_000252365.1_ASM25236v1	59_GCA_000283855.1_ASM28385v1	95.2302	6.16416	1189	1433	82.9728
70_GCA_000283815.1_ASM28381v1	55_GCA_000221205.1_ASM22120v1	95.2295	6.72405	1208	1415	85.371
44_GCA_001051325.1_Rickettsia_aeschlimannii	56_GCA_000237845.1_ASM23784v1	95.2294	6.5009	1171	1442	81.2067
24_GCA_000965185.1_ASM96518v1	73_GCA_000283795.1_ASM28379v1	95.2287	6.68091	1202	1414	85.0071
56_GCA_000237845.1_ASM23784v1	59_GCA_000283855.1_ASM28385v1	95.2269	6.15153	1189	1433	82.9728
33_GCA_000016625.1_ASM1662v1	56_GCA_000237845.1_ASM23784v1	95.2245	6.4351	1219	1442	84.5354
33_GCA_000016625.1_ASM1662v1	54_GCA_000252365.1_ASM25236v1	95.2222	6.44844	1219	1441	84.594
44_GCA_001051325.1_Rickettsia_aeschlimannii	54_GCA_000252365.1_ASM25236v1	95.221	6.52221	1171	1441	81.263
20_SRR2939019_Btrans1	7_GCA_000965005.1_ASM96500v1	95.2198	10.3711	1138	1515	75.1155
42_GCA_000284175.1_ASM28417v1	66_GCA_000166935.1_ASM16693v1	95.219	6.52602	1163	1391	83.6089
24_GCA_000965185.1_ASM96518v1	71_GCA_000283835.1_ASM28383v1	95.2148	6.68418	1204	1416	85.0282
56_GCA_000237845.1_ASM23784v1	25_GCA_000964675.1_ASM96467v1	95.2087	5.86442	1198	1442	83.0791
7_GCA_000965005.1_ASM96500v1	20_SRR2939019_Btrans1	95.208	10.3917	1138	1515	75.1155
20_SRR2939019_Btrans1	8_GCA_000018245.1_ASM1824v1	95.2076	10.063	1145	1522	75.23
54_GCA_000252365.1_ASM25236v1	25_GCA_000964675.1_ASM96467v1	95.2075	5.89267	1198	1441	83.1367
34_GCA_000485845.1_RicGra1.0	59_GCA_000283855.1_ASM28385v1	95.2046	6.6027	1200	1433	83.7404
28_SRR6004191_Lappe4	43_SRR5378821_Ssp4	95.2023	8.74692	956	1174	81.431
67_GCA_000261325.1_RcoCa1.0	42_GCA_000284175.1_ASM28417v1	95.1959	5.99641	1165	1391	83.7527
62_GCA_000964905.1_ASM96490v1	54_GCA_000252365.1_ASM25236v1	95.1921	6.34276	1190	1419	83.8619
53_GCA_000283595.1_ASM28359v1	81_SRR5308138_Pfluc4	95.1879	5.76111	1193	1400	85.2143
79_GCA_001602635.1_ASM160263v1	53_GCA_000283595.1_ASM28359v1	95.18	5.76946	1189	1419	83.7914
62_GCA_000964905.1_ASM96490v1	56_GCA_000237845.1_ASM23784v1	95.1797	6.35656	1189	1419	83.7914
24_GCA_000965185.1_ASM96518v1	72_GCA_000017445.3_ASM1744v3	95.179	6.82277	1204	1417	84.9682
43_SRR5378821_Ssp4	28_SRR6004191_Lappe4	95.179	8.79071	956	1174	81.431
46_GCA_000284075.1_ASM28407v1	61_GCA_000007025.1_ASM702v1	95.1783	5.65578	1178	1415	83.2509
24_GCA_000965185.1_ASM96518v1	70_GCA_000283815.1_ASM28381v1	95.176	6.82476	1204	1415	85.0883
53_GCA_000283595.1_ASM28359v1	79_GCA_001602635.1_ASM160263v1	95.1708	5.7604	1189	1419	83.7914
24_GCA_000965185.1_ASM96518v1	69_GCA_000831545.1_ASM83154v1	95.1707	6.82004	1205	1419	84.919
34_GCA_000485845.1_RicGra1.0	66_GCA_000166935.1_ASM16693v1	95.1632	6.3405	1213	1407	86.2118
8_GCA_000018245.1_ASM1824v1	20_SRR2939019_Btrans1	95.162	10.246	1145	1522	75.23
21_GCA_000284055.1_ASM28405v1	42_GCA_000284175.1_ASM28417v1	95.1559	6.88992	1209	1391	86.9159
58_GCA_000283995.1_ASM28399v1	42_GCA_000284175.1_ASM28417v1	95.1512	5.70781	1162	1391	83.537
56_GCA_000237845.1_ASM23784v1	21_GCA_000284055.1_ASM28405v1	95.1446	6.14763	1207	1442	83.7032
54_GCA_000252365.1_ASM25236v1	21_GCA_000284055.1_ASM28405v1	95.1434	6.17509	1207	1441	83.7613
64_GCA_000246715.2_ASM24671v2	34_GCA_000485845.1_RicGra1.0	95.1374	6.50601	1218	1416	86.0169
42_GCA_000284175.1_ASM28417v1	55_GCA_000221205.1_ASM22120v1	95.125	6.9913	1190	1391	85.55
46_GCA_000284075.1_ASM28407v1	55_GCA_000221205.1_ASM22120v1	95.1059	6.28285	1195	1437	83.1594
34_GCA_000485845.1_RicGra1.0	52_GCA_000023005.1_ASM2300v1	95.0991	6.53157	1217	1437	84.6903
42_GCA_000284175.1_ASM28417v1	47_GCA_000284195.1_ASM28419v1	95.0919	6.90739	1187	1391	85.3343
63_GCA_000265225.2_ASM26522v2	35_SRR3161968_Choog2	95.09	9.15456	1035	1273	81.304
42_GCA_000284175.1_ASM28417v1	49_GCA_000965075.1_ASM96507v1	95.0881	6.91511	1185	1391	85.1905
46_GCA_000284075.1_ASM28407v1	78_GCA_000257435.1_RcoIn1.0	95.088	6.06578	1172	1438	81.5021
44_GCA_001051325.1_Rickettsia_aeschlimannii	57_GCA_000302635.2_ASM30263v2	95.0847	6.33553	1181	1430	82.5874
49_GCA_000965075.1_ASM96507v1	42_GCA_000284175.1_ASM28417v1	95.0844	6.91767	1185	1391	85.1905
74_GCA_000247625.2_ASM24762v2	46_GCA_000284075.1_ASM28407v1	95.0657	5.76145	1166	1448	80.5249
47_GCA_000284195.1_ASM28419v1	42_GCA_000284175.1_ASM28417v1	95.062	6.97887	1187	1391	85.3343
62_GCA_000964905.1_ASM96490v1	39_GCA_000021525.1_ASM2152v1	95.0601	6.60486	1143	1419	80.5497
53_GCA_000283595.1_ASM28359v1	44_GCA_001051325.1_Rickettsia_aeschlimannii	95.0556	6.34249	1178	1436	82.0334
80_GCA_000263815.1_RcoIs1.0	42_GCA_000284175.1_ASM28417v1	95.0523	6.93363	1151	1391	82.7462
34_GCA_000485845.1_RicGra1.0	67_GCA_000261325.1_RcoCa1.0	95.0462	6.60338	1225	1489	82.27
34_GCA_000485845.1_RicGra1.0	33_GCA_000016625.1_ASM1662v1	95.0454	7.08658	1258	1561	80.5894
33_GCA_000016625.1_ASM1662v1	34_GCA_000485845.1_RicGra1.0	95.0438	7.12764	1258	1561	80.5894
81_SRR5308138_Pfluc4	55_GCA_000221205.1_ASM22120v1	95.0411	6.20547	1194	1400	85.2857
57_GCA_000302635.2_ASM30263v2	22_GCA_001442475.1_ASM144247v1	95.0398	7.38589	1183	1430	82.7273
42_GCA_000284175.1_ASM28417v1	48_GCA_000965145.1_ASM96514v1	95.0331	6.99911	1187	1391	85.3343
48_GCA_000965145.1_ASM96514v1	42_GCA_000284175.1_ASM28417v1	95.0306	7.00004	1187	1391	85.3343
40_SRR2939026_Blapp1	35_SRR3161968_Choog2	95.0269	8.5943	1084	1324	81.8731
46_GCA_000284075.1_ASM28407v1	47_GCA_000284195.1_ASM28419v1	95.0254	6.37074	1192	1440	82.7778
46_GCA_000284075.1_ASM28407v1	49_GCA_000965075.1_ASM96507v1	95.0243	6.38056	1189	1441	82.5121
47_GCA_000284195.1_ASM28419v1	46_GCA_000284075.1_ASM28407v1	95.0167	6.3694	1192	1440	82.7778
79_GCA_001602635.1_ASM160263v1	55_GCA_000221205.1_ASM22120v1	95.0162	6.20607	1191	1419	83.9323
74_GCA_000247625.2_ASM24762v2	42_GCA_000284175.1_ASM28417v1	95.0141	6.85038	1181	1391	84.9029
53_GCA_000283595.1_ASM28359v1	22_GCA_001442475.1_ASM144247v1	95.0135	7.39161	1183	1436	82.3816
35_SRR3161968_Choog2	40_SRR2939026_Blapp1	95.0122	8.62903	1084	1324	81.8731
24_GCA_000965185.1_ASM96518v1	81_SRR5308138_Pfluc4	95.007	6.17014	1185	1400	84.6429
46_GCA_000284075.1_ASM28407v1	48_GCA_000965145.1_ASM96514v1	95.0006	6.38605	1193	1440	82.8472
49_GCA_000965075.1_ASM96507v1	46_GCA_000284075.1_ASM28407v1	94.9985	6.40593	1189	1441	82.5121
57_GCA_000302635.2_ASM30263v2	33_GCA_000016625.1_ASM1662v1	94.9975	6.95332	1210	1430	84.6154
48_GCA_000965145.1_ASM96514v1	46_GCA_000284075.1_ASM28407v1	94.9925	6.38311	1193	1440	82.8472
24_GCA_000965185.1_ASM96518v1	79_GCA_001602635.1_ASM160263v1	94.9903	6.16709	1182	1419	83.2981
23_GCA_001273795.1_ASM127379v1	56_GCA_000237845.1_ASM23784v1	94.9878	6.70824	1208	1442	83.7725
23_GCA_001273795.1_ASM127379v1	54_GCA_000252365.1_ASM25236v1	94.9861	6.73321	1208	1441	83.8307
52_GCA_000023005.1_ASM2300v1	42_GCA_000284175.1_ASM28417v1	94.9804	7.00063	1169	1391	84.0403
62_GCA_000964905.1_ASM96490v1	60_GCA_000263055.1_Rho1.0	94.9792	6.71968	1178	1419	83.0162
59_GCA_000283855.1_ASM28385v1	39_GCA_000021525.1_ASM2152v1	94.9738	6.8133	1146	1433	79.9721
67_GCA_000261325.1_RcoCa1.0	46_GCA_000284075.1_ASM28407v1	94.9712	6.15823	1177	1482	79.4197
62_GCA_000964905.1_ASM96490v1	57_GCA_000302635.2_ASM30263v2	94.9692	6.73098	1177	1419	82.9457
53_GCA_000283595.1_ASM28359v1	33_GCA_000016625.1_ASM1662v1	94.9649	6.9771	1210	1436	84.2618
53_GCA_000283595.1_ASM28359v1	62_GCA_000964905.1_ASM96490v1	94.9632	6.71949	1176	1419	82.8753
62_GCA_000964905.1_ASM96490v1	53_GCA_000283595.1_ASM28359v1	94.9603	6.72991	1176	1419	82.8753
24_GCA_000965185.1_ASM96518v1	42_GCA_000284175.1_ASM28417v1	94.9579	7.45985	1202	1391	86.4127
46_GCA_000284075.1_ASM28407v1	60_GCA_000263055.1_Rho1.0	94.9485	6.65923	1193	1465	81.4334
42_GCA_000284175.1_ASM28417v1	24_GCA_000965185.1_ASM96518v1	94.9474	7.47388	1202	1391	86.4127
39_GCA_000021525.1_ASM2152v1	46_GCA_000284075.1_ASM28407v1	94.9391	7.12232	1162	1482	78.4076
52_GCA_000023005.1_ASM2300v1	46_GCA_000284075.1_ASM28407v1	94.9376	6.37486	1176	1437	81.8372
46_GCA_000284075.1_ASM28407v1	39_GCA_000021525.1_ASM2152v1	94.9335	7.1293	1162	1482	78.4076
21_GCA_000284055.1_ASM28405v1	46_GCA_000284075.1_ASM28407v1	94.9325	7.2318	1207	1482	81.444
57_GCA_000302635.2_ASM30263v2	59_GCA_000283855.1_ASM28385v1	94.9292	6.87725	1175	1430	82.1678
59_GCA_000283855.1_ASM28385v1	60_GCA_000263055.1_Rho1.0	94.9278	6.8321	1179	1433	82.2749
53_GCA_000283595.1_ASM28359v1	59_GCA_000283855.1_ASM28385v1	94.9247	6.87658	1173	1433	81.8562
34_GCA_000485845.1_RicGra1.0	75_GCA_000018225.1_ASM1822v1	94.9241	5.9287	1184	1396	84.8138
34_GCA_000485845.1_RicGra1.0	73_GCA_000283795.1_ASM28379v1	94.9197	5.96003	1192	1414	84.2999
34_GCA_000485845.1_RicGra1.0	70_GCA_000283815.1_ASM28381v1	94.9166	5.96698	1193	1415	84.311
60_GCA_000263055.1_Rho1.0	59_GCA_000283855.1_ASM28385v1	94.9128	6.81008	1179	1433	82.2749
34_GCA_000485845.1_RicGra1.0	69_GCA_000831545.1_ASM83154v1	94.9128	5.95386	1195	1419	84.2142
22_GCA_001442475.1_ASM144247v1	39_GCA_000021525.1_ASM2152v1	94.9121	6.71276	1172	1512	77.5132
46_GCA_000284075.1_ASM28407v1	21_GCA_000284055.1_ASM28405v1	94.9105	7.32279	1207	1482	81.444
34_GCA_000485845.1_RicGra1.0	39_GCA_000021525.1_ASM2152v1	94.8998	7.62722	1199	1512	79.2989
64_GCA_000246715.2_ASM24671v2	46_GCA_000284075.1_ASM28407v1	94.8928	6.62191	1172	1416	82.7684
65_GCA_000283935.1_ASM28393v1	46_GCA_000284075.1_ASM28407v1	94.8908	5.82656	1171	1415	82.7562
71_GCA_000283835.1_ASM28383v1	34_GCA_000485845.1_RicGra1.0	94.8874	6.02487	1194	1416	84.322
34_GCA_000485845.1_RicGra1.0	74_GCA_000247625.2_ASM24762v2	94.8874	7.60617	1212	1448	83.7017
76_GCA_000831525.1_ASM83152v1	34_GCA_000485845.1_RicGra1.0	94.8862	6.02403	1184	1396	84.8138
72_GCA_000017445.3_ASM1744v3	34_GCA_000485845.1_RicGra1.0	94.8818	6.05387	1194	1417	84.2625
62_GCA_000964905.1_ASM96490v1	58_GCA_000283995.1_ASM28399v1	94.8763	6.09376	1156	1404	82.3362
78_GCA_000257435.1_RcoIn1.0	22_GCA_001442475.1_ASM144247v1	94.8761	6.91258	1164	1438	80.9458
77_GCA_000283955.1_ASM28395v1	34_GCA_000485845.1_RicGra1.0	94.8746	6.08175	1186	1396	84.957
39_GCA_000021525.1_ASM2152v1	34_GCA_000485845.1_RicGra1.0	94.8722	7.74764	1199	1512	79.2989
46_GCA_000284075.1_ASM28407v1	66_GCA_000166935.1_ASM16693v1	94.8719	6.66297	1174	1407	83.4399
46_GCA_000284075.1_ASM28407v1	58_GCA_000283995.1_ASM28399v1	94.868	6.19056	1172	1404	83.4758
34_GCA_000485845.1_RicGra1.0	68_GCA_000283775.1_ASM28377v1	94.8679	6.13745	1195	1413	84.5718
60_GCA_000263055.1_Rho1.0	23_GCA_001273795.1_ASM127379v1	94.8669	6.3012	1199	1465	81.843
22_GCA_001442475.1_ASM144247v1	49_GCA_000965075.1_ASM96507v1	94.8612	6.87426	1191	1441	82.6509
61_GCA_000007025.1_ASM702v1	22_GCA_001442475.1_ASM144247v1	94.8611	6.97352	1171	1415	82.7562
22_GCA_001442475.1_ASM144247v1	47_GCA_000284195.1_ASM28419v1	94.8566	6.8622	1195	1440	82.9861
44_GCA_001051325.1_Rickettsia_aeschlimannii	60_GCA_000263055.1_Rho1.0	94.8553	6.97547	1168	1465	79.727
33_GCA_000016625.1_ASM1662v1	60_GCA_000263055.1_Rho1.0	94.855	7.17961	1225	1465	83.6177
23_GCA_001273795.1_ASM127379v1	46_GCA_000284075.1_ASM28407v1	94.8503	7.22513	1205	1482	81.309
44_GCA_001051325.1_Rickettsia_aeschlimannii	34_GCA_000485845.1_RicGra1.0	94.8483	7.26179	1227	1504	81.5824
58_GCA_000283995.1_ASM28399v1	22_GCA_001442475.1_ASM144247v1	94.8444	6.29313	1172	1404	83.4758
46_GCA_000284075.1_ASM28407v1	23_GCA_001273795.1_ASM127379v1	94.8384	7.28836	1205	1482	81.309
22_GCA_001442475.1_ASM144247v1	48_GCA_000965145.1_ASM96514v1	94.8383	6.8575	1197	1440	83.125
60_GCA_000263055.1_Rho1.0	21_GCA_000284055.1_ASM28405v1	94.8318	6.78845	1203	1465	82.116
39_GCA_000021525.1_ASM2152v1	25_GCA_000964675.1_ASM96467v1	94.8254	6.25257	1167	1512	77.1825
62_GCA_000964905.1_ASM96490v1	64_GCA_000246715.2_ASM24671v2	94.8182	6.64272	1167	1416	82.4153
33_GCA_000016625.1_ASM1662v1	39_GCA_000021525.1_ASM2152v1	94.8175	7.3055	1190	1512	78.7037
34_GCA_000485845.1_RicGra1.0	65_GCA_000283935.1_ASM28393v1	94.8146	6.53439	1202	1415	84.947
60_GCA_000263055.1_Rho1.0	22_GCA_001442475.1_ASM144247v1	94.8134	7.22727	1184	1465	80.8191
39_GCA_000021525.1_ASM2152v1	33_GCA_000016625.1_ASM1662v1	94.8071	7.41769	1190	1512	78.7037
64_GCA_000246715.2_ASM24671v2	62_GCA_000964905.1_ASM96490v1	94.8053	6.66258	1167	1416	82.4153
25_GCA_000964675.1_ASM96467v1	34_GCA_000485845.1_RicGra1.0	94.8001	7.238	1261	1562	80.7298
33_GCA_000016625.1_ASM1662v1	66_GCA_000166935.1_ASM16693v1	94.7979	6.73012	1207	1407	85.7854
62_GCA_000964905.1_ASM96490v1	47_GCA_000284195.1_ASM28419v1	94.7957	6.93617	1183	1419	83.3686
64_GCA_000246715.2_ASM24671v2	33_GCA_000016625.1_ASM1662v1	94.7956	6.74093	1207	1416	85.2401
44_GCA_001051325.1_Rickettsia_aeschlimannii	61_GCA_000007025.1_ASM702v1	94.7945	7.30932	1146	1415	80.9894
44_GCA_001051325.1_Rickettsia_aeschlimannii	55_GCA_000221205.1_ASM22120v1	94.7937	7.18432	1176	1437	81.8372
21_GCA_000284055.1_ASM28405v1	34_GCA_000485845.1_RicGra1.0	94.7896	7.47266	1264	1562	80.9219
62_GCA_000964905.1_ASM96490v1	48_GCA_000965145.1_ASM96514v1	94.7891	6.93463	1182	1419	83.2981
64_GCA_000246715.2_ASM24671v2	59_GCA_000283855.1_ASM28385v1	94.7879	6.7035	1169	1416	82.5565
22_GCA_001442475.1_ASM144247v1	25_GCA_000964675.1_ASM96467v1	94.7851	7.5094	1216	1596	76.1905
80_GCA_000263815.1_RcoIs1.0	46_GCA_000284075.1_ASM28407v1	94.7791	6.78155	1162	1482	78.4076
62_GCA_000964905.1_ASM96490v1	49_GCA_000965075.1_ASM96507v1	94.7787	6.9621	1183	1419	83.3686
34_GCA_000485845.1_RicGra1.0	58_GCA_000283995.1_ASM28399v1	94.7762	6.57813	1214	1404	86.4672
78_GCA_000257435.1_RcoIn1.0	59_GCA_000283855.1_ASM28385v1	94.7701	7.06603	1155	1433	80.6001
62_GCA_000964905.1_ASM96490v1	55_GCA_000221205.1_ASM22120v1	94.7697	7.18948	1180	1419	83.1572
55_GCA_000221205.1_ASM22120v1	59_GCA_000283855.1_ASM28385v1	94.7693	7.22004	1177	1433	82.1354
62_GCA_000964905.1_ASM96490v1	24_GCA_000965185.1_ASM96518v1	94.7687	7.3558	1176	1419	82.8753
33_GCA_000016625.1_ASM1662v1	55_GCA_000221205.1_ASM22120v1	94.7616	7.05248	1216	1437	84.6207
74_GCA_000247625.2_ASM24762v2	22_GCA_001442475.1_ASM144247v1	94.7607	7.20577	1165	1448	80.4558
65_GCA_000283935.1_ASM28393v1	42_GCA_000284175.1_ASM28417v1	94.7591	6.96066	1162	1391	83.537
59_GCA_000283855.1_ASM28385v1	55_GCA_000221205.1_ASM22120v1	94.7579	7.25017	1177	1433	82.1354
44_GCA_001051325.1_Rickettsia_aeschlimannii	49_GCA_000965075.1_ASM96507v1	94.753	7.50536	1158	1441	80.3609
33_GCA_000016625.1_ASM1662v1	67_GCA_000261325.1_RcoCa1.0	94.7459	6.4648	1211	1489	81.3298
58_GCA_000283995.1_ASM28399v1	59_GCA_000283855.1_ASM28385v1	94.7383	6.71835	1158	1404	82.4786
76_GCA_000831525.1_ASM83152v1	59_GCA_000283855.1_ASM28385v1	94.7249	6.2388	1146	1396	82.0917
62_GCA_000964905.1_ASM96490v1	61_GCA_000007025.1_ASM702v1	94.7246	6.81224	1171	1415	82.7562
62_GCA_000964905.1_ASM96490v1	21_GCA_000284055.1_ASM28405v1	94.7239	7.57471	1179	1419	83.0867
75_GCA_000018225.1_ASM1822v1	59_GCA_000283855.1_ASM28385v1	94.7238	6.24146	1146	1396	82.0917
22_GCA_001442475.1_ASM144247v1	34_GCA_000485845.1_RicGra1.0	94.7232	8.31351	1245	1562	79.7055
59_GCA_000283855.1_ASM28385v1	75_GCA_000018225.1_ASM1822v1	94.7218	6.24932	1146	1396	82.0917
62_GCA_000964905.1_ASM96490v1	76_GCA_000831525.1_ASM83152v1	94.7197	6.24976	1147	1396	82.1633
62_GCA_000964905.1_ASM96490v1	75_GCA_000018225.1_ASM1822v1	94.7185	6.25225	1147	1396	82.1633
77_GCA_000283955.1_ASM28395v1	59_GCA_000283855.1_ASM28385v1	94.7171	6.22408	1149	1396	82.3066
62_GCA_000964905.1_ASM96490v1	52_GCA_000023005.1_ASM2300v1	94.7164	7.02866	1172	1419	82.5934
59_GCA_000283855.1_ASM28385v1	66_GCA_000166935.1_ASM16693v1	94.7158	6.88088	1167	1407	82.9424
33_GCA_000016625.1_ASM1662v1	61_GCA_000007025.1_ASM702v1	94.7145	7.32441	1203	1415	85.0177
33_GCA_000016625.1_ASM1662v1	78_GCA_000257435.1_RcoIn1.0	94.7131	7.5277	1185	1438	82.4061
24_GCA_000965185.1_ASM96518v1	34_GCA_000485845.1_RicGra1.0	94.713	7.88658	1251	1562	80.0896
72_GCA_000017445.3_ASM1744v3	42_GCA_000284175.1_ASM28417v1	94.7123	6.93726	1168	1391	83.9684
62_GCA_000964905.1_ASM96490v1	65_GCA_000283935.1_ASM28393v1	94.712	6.39825	1159	1415	81.9081
47_GCA_000284195.1_ASM28419v1	59_GCA_000283855.1_ASM28385v1	94.7119	7.19024	1186	1433	82.7634
62_GCA_000964905.1_ASM96490v1	78_GCA_000257435.1_RcoIn1.0	94.7114	7.22265	1155	1419	81.3953
62_GCA_000964905.1_ASM96490v1	77_GCA_000283955.1_ASM28395v1	94.7087	6.23735	1149	1396	82.3066
25_GCA_000964675.1_ASM96467v1	46_GCA_000284075.1_ASM28407v1	94.7086	7.8088	1186	1482	80.027
59_GCA_000283855.1_ASM28385v1	61_GCA_000007025.1_ASM702v1	94.7079	6.90711	1170	1415	82.6855
39_GCA_000021525.1_ASM2152v1	44_GCA_001051325.1_Rickettsia_aeschlimannii	94.7054	7.59449	1155	1504	76.7952
42_GCA_000284175.1_ASM28417v1	81_SRR5308138_Pfluc4	94.7053	6.02425	1134	1391	81.5241
33_GCA_000016625.1_ASM1662v1	49_GCA_000965075.1_ASM96507v1	94.7016	7.13415	1219	1441	84.594
62_GCA_000964905.1_ASM96490v1	23_GCA_001273795.1_ASM127379v1	94.7007	7.52943	1183	1419	83.3686
61_GCA_000007025.1_ASM702v1	59_GCA_000283855.1_ASM28385v1	94.7004	6.92377	1170	1415	82.6855
33_GCA_000016625.1_ASM1662v1	47_GCA_000284195.1_ASM28419v1	94.7001	7.13814	1220	1440	84.7222
48_GCA_000965145.1_ASM96514v1	59_GCA_000283855.1_ASM28385v1	94.6984	7.20449	1184	1433	82.6239
33_GCA_000016625.1_ASM1662v1	48_GCA_000965145.1_ASM96514v1	94.6984	7.13592	1220	1440	84.7222
70_GCA_000283815.1_ASM28381v1	42_GCA_000284175.1_ASM28417v1	94.6977	6.95225	1168	1391	83.9684
46_GCA_000284075.1_ASM28407v1	25_GCA_000964675.1_ASM96467v1	94.6972	7.8562	1186	1482	80.027
66_GCA_000166935.1_ASM16693v1	59_GCA_000283855.1_ASM28385v1	94.6969	6.89965	1167	1407	82.9424
62_GCA_000964905.1_ASM96490v1	67_GCA_000261325.1_RcoCa1.0	94.696	6.8245	1175	1419	82.8048
59_GCA_000283855.1_ASM28385v1	49_GCA_000965075.1_ASM96507v1	94.6934	7.22219	1186	1433	82.7634
52_GCA_000023005.1_ASM2300v1	22_GCA_001442475.1_ASM144247v1	94.6926	7.22321	1171	1437	81.4892
23_GCA_001273795.1_ASM127379v1	59_GCA_000283855.1_ASM28385v1	94.6917	7.39526	1194	1433	83.3217
44_GCA_001051325.1_Rickettsia_aeschlimannii	52_GCA_000023005.1_ASM2300v1	94.6916	7.17128	1153	1437	80.2366
49_GCA_000965075.1_ASM96507v1	59_GCA_000283855.1_ASM28385v1	94.6886	7.22434	1186	1433	82.7634
46_GCA_000284075.1_ASM28407v1	73_GCA_000283795.1_ASM28379v1	94.6884	6.27332	1176	1414	83.1683
42_GCA_000284175.1_ASM28417v1	73_GCA_000283795.1_ASM28379v1	94.6884	7.09898	1167	1391	83.8965
47_GCA_000284195.1_ASM28419v1	33_GCA_000016625.1_ASM1662v1	94.6877	7.13255	1220	1440	84.7222
41_SRR5367914_S2	28_SRR6004191_Lappe4	94.6867	9.90742	957	1183	80.896
62_GCA_000964905.1_ASM96490v1	66_GCA_000166935.1_ASM16693v1	94.686	7.02373	1166	1407	82.8714
42_GCA_000284175.1_ASM28417v1	79_GCA_001602635.1_ASM160263v1	94.6858	6.01389	1132	1391	81.3803
58_GCA_000283995.1_ASM28399v1	25_GCA_000964675.1_ASM96467v1	94.6856	5.68302	1180	1404	84.0456
76_GCA_000831525.1_ASM83152v1	42_GCA_000284175.1_ASM28417v1	94.6853	7.21945	1159	1391	83.3214
75_GCA_000018225.1_ASM1822v1	42_GCA_000284175.1_ASM28417v1	94.6847	7.22081	1159	1391	83.3214
44_GCA_001051325.1_Rickettsia_aeschlimannii	47_GCA_000284195.1_ASM28419v1	94.6845	7.71004	1161	1440	80.625
44_GCA_001051325.1_Rickettsia_aeschlimannii	39_GCA_000021525.1_ASM2152v1	94.682	7.69132	1155	1504	76.7952
49_GCA_000965075.1_ASM96507v1	33_GCA_000016625.1_ASM1662v1	94.6806	7.14051	1219	1441	84.594
77_GCA_000283955.1_ASM28395v1	42_GCA_000284175.1_ASM28417v1	94.6797	7.09091	1161	1391	83.4651
42_GCA_000284175.1_ASM28417v1	69_GCA_000831545.1_ASM83154v1	94.6791	7.09781	1169	1391	84.0403
67_GCA_000261325.1_RcoCa1.0	22_GCA_001442475.1_ASM144247v1	94.6784	7.05713	1172	1489	78.7105
28_SRR6004191_Lappe4	41_SRR5367914_S2	94.6777	9.96885	957	1183	80.896
46_GCA_000284075.1_ASM28407v1	69_GCA_000831545.1_ASM83154v1	94.6771	6.26688	1179	1419	83.0867
61_GCA_000007025.1_ASM702v1	23_GCA_001273795.1_ASM127379v1	94.6748	6.50002	1189	1415	84.0283
71_GCA_000283835.1_ASM28383v1	46_GCA_000284075.1_ASM28407v1	94.6736	6.25649	1178	1416	83.1921
48_GCA_000965145.1_ASM96514v1	33_GCA_000016625.1_ASM1662v1	94.6734	7.14502	1220	1440	84.7222
48_GCA_000965145.1_ASM96514v1	44_GCA_001051325.1_Rickettsia_aeschlimannii	94.6726	7.70652	1162	1440	80.6944
61_GCA_000007025.1_ASM702v1	25_GCA_000964675.1_ASM96467v1	94.6717	6.8402	1179	1415	83.3216
23_GCA_001273795.1_ASM127379v1	34_GCA_000485845.1_RicGra1.0	94.6714	7.68085	1270	1562	81.306
71_GCA_000283835.1_ASM28383v1	42_GCA_000284175.1_ASM28417v1	94.6695	7.12514	1168	1391	83.9684
44_GCA_001051325.1_Rickettsia_aeschlimannii	78_GCA_000257435.1_RcoIn1.0	94.6688	7.69411	1140	1438	79.2768
44_GCA_001051325.1_Rickettsia_aeschlimannii	48_GCA_000965145.1_ASM96514v1	94.6664	7.72256	1162	1440	80.6944
67_GCA_000261325.1_RcoCa1.0	23_GCA_001273795.1_ASM127379v1	94.6628	6.58693	1189	1489	79.8522
65_GCA_000283935.1_ASM28393v1	59_GCA_000283855.1_ASM28385v1	94.6612	6.66139	1159	1415	81.9081
46_GCA_000284075.1_ASM28407v1	70_GCA_000283815.1_ASM28381v1	94.6605	6.31945	1178	1415	83.2509
25_GCA_000964675.1_ASM96467v1	44_GCA_001051325.1_Rickettsia_aeschlimannii	94.6603	7.82757	1182	1504	78.5904
72_GCA_000017445.3_ASM1744v3	46_GCA_000284075.1_ASM28407v1	94.6594	6.29429	1178	1417	83.1334
77_GCA_000283955.1_ASM28395v1	46_GCA_000284075.1_ASM28407v1	94.6593	6.33885	1172	1396	83.9542
67_GCA_000261325.1_RcoCa1.0	59_GCA_000283855.1_ASM28385v1	94.6554	6.92595	1177	1433	82.1354
68_GCA_000283775.1_ASM28377v1	42_GCA_000284175.1_ASM28417v1	94.655	7.06251	1169	1391	84.0403
62_GCA_000964905.1_ASM96490v1	25_GCA_000964675.1_ASM96467v1	94.6539	7.71139	1172	1419	82.5934
67_GCA_000261325.1_RcoCa1.0	21_GCA_000284055.1_ASM28405v1	94.652	6.74195	1188	1489	79.7851
44_GCA_001051325.1_Rickettsia_aeschlimannii	25_GCA_000964675.1_ASM96467v1	94.6498	7.81478	1182	1504	78.5904
73_GCA_000283795.1_ASM28379v1	59_GCA_000283855.1_ASM28385v1	94.6479	6.52253	1154	1414	81.6124
59_GCA_000283855.1_ASM28385v1	73_GCA_000283795.1_ASM28379v1	94.6472	6.5269	1154	1414	81.6124
62_GCA_000964905.1_ASM96490v1	73_GCA_000283795.1_ASM28379v1	94.6455	6.52809	1155	1414	81.6832
72_GCA_000017445.3_ASM1744v3	59_GCA_000283855.1_ASM28385v1	94.6419	6.45383	1155	1417	81.5102
72_GCA_000017445.3_ASM1744v3	62_GCA_000964905.1_ASM96490v1	94.6417	6.45279	1156	1417	81.5808
46_GCA_000284075.1_ASM28407v1	76_GCA_000831525.1_ASM83152v1	94.6415	6.47264	1173	1396	84.0258
62_GCA_000964905.1_ASM96490v1	72_GCA_000017445.3_ASM1744v3	94.6414	6.4566	1156	1417	81.5808
70_GCA_000283815.1_ASM28381v1	59_GCA_000283855.1_ASM28385v1	94.6398	6.46155	1155	1415	81.6254
71_GCA_000283835.1_ASM28383v1	59_GCA_000283855.1_ASM28385v1	94.6389	6.52504	1155	1416	81.5678
46_GCA_000284075.1_ASM28407v1	75_GCA_000018225.1_ASM1822v1	94.6386	6.47709	1173	1396	84.0258
69_GCA_000831545.1_ASM83154v1	59_GCA_000283855.1_ASM28385v1	94.6374	6.52757	1156	1419	81.4658
59_GCA_000283855.1_ASM28385v1	69_GCA_000831545.1_ASM83154v1	94.6371	6.53135	1156	1419	81.4658
62_GCA_000964905.1_ASM96490v1	70_GCA_000283815.1_ASM28381v1	94.6359	6.46793	1156	1415	81.6961
62_GCA_000964905.1_ASM96490v1	71_GCA_000283835.1_ASM28383v1	94.6346	6.53212	1156	1416	81.6384
62_GCA_000964905.1_ASM96490v1	69_GCA_000831545.1_ASM83154v1	94.6333	6.53374	1157	1419	81.5363
33_GCA_000016625.1_ASM1662v1	65_GCA_000283935.1_ASM28393v1	94.629	6.52851	1195	1415	84.4523
60_GCA_000263055.1_Rho1.0	25_GCA_000964675.1_ASM96467v1	94.6251	7.50103	1196	1465	81.6382
59_GCA_000283855.1_ASM28385v1	21_GCA_000284055.1_ASM28405v1	94.6211	7.68043	1192	1433	83.1821
21_GCA_000284055.1_ASM28405v1	44_GCA_001051325.1_Rickettsia_aeschlimannii	94.6179	7.93358	1213	1504	80.6516
67_GCA_000261325.1_RcoCa1.0	25_GCA_000964675.1_ASM96467v1	94.6166	7.11028	1183	1489	79.4493
46_GCA_000284075.1_ASM28407v1	24_GCA_000965185.1_ASM96518v1	94.6115	7.6916	1211	1482	81.7139
78_GCA_000257435.1_RcoIn1.0	23_GCA_001273795.1_ASM127379v1	94.6065	6.83193	1181	1438	82.128
24_GCA_000965185.1_ASM96518v1	59_GCA_000283855.1_ASM28385v1	94.6044	7.72235	1179	1433	82.2749
24_GCA_000965185.1_ASM96518v1	46_GCA_000284075.1_ASM28407v1	94.6036	7.69863	1211	1482	81.7139
33_GCA_000016625.1_ASM1662v1	58_GCA_000283995.1_ASM28399v1	94.6024	6.53159	1199	1404	85.3989
65_GCA_000283935.1_ASM28393v1	22_GCA_001442475.1_ASM144247v1	94.5982	6.70601	1168	1415	82.5442
23_GCA_001273795.1_ASM127379v1	44_GCA_001051325.1_Rickettsia_aeschlimannii	94.5969	7.77721	1210	1504	80.4521
64_GCA_000246715.2_ASM24671v2	22_GCA_001442475.1_ASM144247v1	94.5948	7.84919	1172	1416	82.7684
61_GCA_000007025.1_ASM702v1	21_GCA_000284055.1_ASM28405v1	94.5914	7.05649	1188	1415	83.9576
21_GCA_000284055.1_ASM28405v1	33_GCA_000016625.1_ASM1662v1	94.5896	7.38433	1243	1561	79.6284
21_GCA_000284055.1_ASM28405v1	55_GCA_000221205.1_ASM22120v1	94.5775	7.517	1204	1437	83.7857
80_GCA_000263815.1_RcoIs1.0	44_GCA_001051325.1_Rickettsia_aeschlimannii	94.5766	7.22091	1143	1489	76.7629
62_GCA_000964905.1_ASM96490v1	80_GCA_000263815.1_RcoIs1.0	94.5754	7.43267	1160	1419	81.7477
44_GCA_001051325.1_Rickettsia_aeschlimannii	74_GCA_000247625.2_ASM24762v2	94.5743	7.63968	1156	1448	79.8343
22_GCA_001442475.1_ASM144247v1	55_GCA_000221205.1_ASM22120v1	94.5726	8.23019	1194	1437	83.0898
22_GCA_001442475.1_ASM144247v1	66_GCA_000166935.1_ASM16693v1	94.5634	7.87185	1173	1407	83.3689
68_GCA_000283775.1_ASM28377v1	59_GCA_000283855.1_ASM28385v1	94.5615	6.68661	1156	1413	81.8117
52_GCA_000023005.1_ASM2300v1	25_GCA_000964675.1_ASM96467v1	94.5605	6.89329	1174	1437	81.698
33_GCA_000016625.1_ASM1662v1	75_GCA_000018225.1_ASM1822v1	94.5593	6.74878	1186	1396	84.957
62_GCA_000964905.1_ASM96490v1	74_GCA_000247625.2_ASM24762v2	94.558	7.21102	1171	1419	82.5229
62_GCA_000964905.1_ASM96490v1	68_GCA_000283775.1_ASM28377v1	94.5568	6.68924	1157	1413	81.8825
81_SRR5308138_Pfluc4	34_GCA_000485845.1_RicGra1.0	94.5567	6.71245	1189	1400	84.9286
80_GCA_000263815.1_RcoIs1.0	59_GCA_000283855.1_ASM28385v1	94.554	7.493	1161	1433	81.0188
6_SRR8133482_Ofont3	29_Ri_A.bipunctata	94.5539	12.1585	981	1341	73.1544
79_GCA_001602635.1_ASM160263v1	34_GCA_000485845.1_RicGra1.0	94.5494	6.70857	1188	1419	83.7209
49_GCA_000965075.1_ASM96507v1	25_GCA_000964675.1_ASM96467v1	94.5458	7.43574	1198	1441	83.1367
29_Ri_A.bipunctata	6_SRR8133482_Ofont3	94.5429	12.1688	981	1341	73.1544
76_GCA_000831525.1_ASM83152v1	33_GCA_000016625.1_ASM1662v1	94.5415	6.76331	1186	1396	84.957
33_GCA_000016625.1_ASM1662v1	74_GCA_000247625.2_ASM24762v2	94.5401	7.32192	1209	1448	83.4945
25_GCA_000964675.1_ASM96467v1	47_GCA_000284195.1_ASM28419v1	94.5398	7.39454	1199	1440	83.2639
78_GCA_000257435.1_RcoIn1.0	21_GCA_000284055.1_ASM28405v1	94.5393	7.34811	1178	1438	81.9193
46_GCA_000284075.1_ASM28407v1	68_GCA_000283775.1_ASM28377v1	94.536	6.8519	1178	1413	83.3687
44_GCA_001051325.1_Rickettsia_aeschlimannii	67_GCA_000261325.1_RcoCa1.0	94.5359	7.46819	1159	1489	77.8375
73_GCA_000283795.1_ASM28379v1	22_GCA_001442475.1_ASM144247v1	94.5348	6.73667	1169	1414	82.6733
21_GCA_000284055.1_ASM28405v1	49_GCA_000965075.1_ASM96507v1	94.5342	7.51283	1204	1441	83.5531
59_GCA_000283855.1_ASM28385v1	25_GCA_000964675.1_ASM96467v1	94.5315	8.08122	1174	1433	81.926
23_GCA_001273795.1_ASM127379v1	33_GCA_000016625.1_ASM1662v1	94.5309	7.42579	1249	1561	80.0128
25_GCA_000964675.1_ASM96467v1	33_GCA_000016625.1_ASM1662v1	94.53	7.68751	1235	1561	79.116
80_GCA_000263815.1_RcoIs1.0	33_GCA_000016625.1_ASM1662v1	94.5292	7.39949	1190	1489	79.9194
23_GCA_001273795.1_ASM127379v1	55_GCA_000221205.1_ASM22120v1	94.5203	7.48437	1200	1437	83.5073
71_GCA_000283835.1_ASM28383v1	22_GCA_001442475.1_ASM144247v1	94.517	6.74562	1171	1416	82.6977
23_GCA_001273795.1_ASM127379v1	22_GCA_001442475.1_ASM144247v1	94.5134	7.70601	1230	1609	76.445
69_GCA_000831545.1_ASM83154v1	22_GCA_001442475.1_ASM144247v1	94.5128	6.74583	1172	1419	82.5934
24_GCA_000965185.1_ASM96518v1	33_GCA_000016625.1_ASM1662v1	94.5125	7.35204	1243	1561	79.6284
48_GCA_000965145.1_ASM96514v1	25_GCA_000964675.1_ASM96467v1	94.5067	7.49056	1199	1440	83.2639
72_GCA_000017445.3_ASM1744v3	22_GCA_001442475.1_ASM144247v1	94.5067	6.77567	1171	1417	82.6394
22_GCA_001442475.1_ASM144247v1	23_GCA_001273795.1_ASM127379v1	94.5043	7.72697	1230	1609	76.445
68_GCA_000283775.1_ASM28377v1	22_GCA_001442475.1_ASM144247v1	94.5011	6.87211	1169	1413	82.7318
23_GCA_001273795.1_ASM127379v1	49_GCA_000965075.1_ASM96507v1	94.5007	7.45053	1202	1441	83.4143
70_GCA_000283815.1_ASM28381v1	22_GCA_001442475.1_ASM144247v1	94.4999	6.78672	1171	1415	82.7562
74_GCA_000247625.2_ASM24762v2	59_GCA_000283855.1_ASM28385v1	94.4905	7.44409	1170	1433	81.6469
44_GCA_001051325.1_Rickettsia_aeschlimannii	66_GCA_000166935.1_ASM16693v1	94.4857	7.90206	1150	1407	81.7342
22_GCA_001442475.1_ASM144247v1	80_GCA_000263815.1_RcoIs1.0	94.4854	7.58881	1164	1489	78.1733
78_GCA_000257435.1_RcoIn1.0	25_GCA_000964675.1_ASM96467v1	94.4826	7.49538	1180	1438	82.0584
48_GCA_000965145.1_ASM96514v1	21_GCA_000284055.1_ASM28405v1	94.4785	7.63464	1206	1440	83.75
22_GCA_001442475.1_ASM144247v1	77_GCA_000283955.1_ASM28395v1	94.4733	7.02594	1168	1396	83.6676
21_GCA_000284055.1_ASM28405v1	47_GCA_000284195.1_ASM28419v1	94.4665	7.75671	1207	1440	83.8194
33_GCA_000016625.1_ASM1662v1	73_GCA_000283795.1_ASM28379v1	94.462	6.85822	1198	1414	84.7242
64_GCA_000246715.2_ASM24671v2	44_GCA_001051325.1_Rickettsia_aeschlimannii	94.4604	7.91598	1154	1416	81.4972
33_GCA_000016625.1_ASM1662v1	71_GCA_000283835.1_ASM28383v1	94.456	6.85752	1200	1416	84.7458
33_GCA_000016625.1_ASM1662v1	69_GCA_000831545.1_ASM83154v1	94.456	6.85855	1201	1419	84.6371
23_GCA_001273795.1_ASM127379v1	48_GCA_000965145.1_ASM96514v1	94.4545	7.50068	1204	1440	83.6111
39_GCA_000021525.1_ASM2152v1	21_GCA_000284055.1_ASM28405v1	94.4522	7.56312	1181	1512	78.1085
22_GCA_001442475.1_ASM144247v1	76_GCA_000831525.1_ASM83152v1	94.4507	7.14059	1169	1396	83.7393
33_GCA_000016625.1_ASM1662v1	68_GCA_000283775.1_ASM28377v1	94.4495	6.82786	1199	1413	84.8549
21_GCA_000284055.1_ASM28405v1	39_GCA_000021525.1_ASM2152v1	94.4481	7.53781	1181	1512	78.1085
33_GCA_000016625.1_ASM1662v1	70_GCA_000283815.1_ASM28381v1	94.4479	6.87556	1200	1415	84.8057
52_GCA_000023005.1_ASM2300v1	59_GCA_000283855.1_ASM28385v1	94.4463	8.00951	1177	1433	82.1354
23_GCA_001273795.1_ASM127379v1	47_GCA_000284195.1_ASM28419v1	94.4435	7.6832	1205	1440	83.6806
72_GCA_000017445.3_ASM1744v3	33_GCA_000016625.1_ASM1662v1	94.4367	6.88224	1200	1417	84.686
23_GCA_001273795.1_ASM127379v1	58_GCA_000283995.1_ASM28399v1	94.4313	6.65152	1186	1404	84.4729
75_GCA_000018225.1_ASM1822v1	22_GCA_001442475.1_ASM144247v1	94.4291	7.14873	1169	1396	83.7393
21_GCA_000284055.1_ASM28405v1	22_GCA_001442475.1_ASM144247v1	94.4209	8.04027	1236	1609	76.8179
22_GCA_001442475.1_ASM144247v1	21_GCA_000284055.1_ASM28405v1	94.41	8.0459	1236	1609	76.8179
77_GCA_000283955.1_ASM28395v1	33_GCA_000016625.1_ASM1662v1	94.4084	7.15514	1190	1396	85.2436
74_GCA_000247625.2_ASM24762v2	25_GCA_000964675.1_ASM96467v1	94.3904	7.57487	1179	1448	81.4227
58_GCA_000283995.1_ASM28399v1	21_GCA_000284055.1_ASM28405v1	94.3887	6.95711	1187	1404	84.5442
57_GCA_000302635.2_ASM30263v2	23_GCA_001273795.1_ASM127379v1	94.3867	8.71132	1200	1430	83.9161
46_GCA_000284075.1_ASM28407v1	81_SRR5308138_Pfluc4	94.3782	6.42363	1159	1400	82.7857
80_GCA_000263815.1_RcoIs1.0	25_GCA_000964675.1_ASM96467v1	94.3662	7.40914	1180	1489	79.2478
46_GCA_000284075.1_ASM28407v1	79_GCA_001602635.1_ASM160263v1	94.3625	6.41114	1159	1419	81.6772
53_GCA_000283595.1_ASM28359v1	23_GCA_001273795.1_ASM127379v1	94.3614	8.69066	1202	1436	83.7047
25_GCA_000964675.1_ASM96467v1	66_GCA_000166935.1_ASM16693v1	94.3581	7.72579	1175	1407	83.511
64_GCA_000246715.2_ASM24671v2	25_GCA_000964675.1_ASM96467v1	94.3515	8.01381	1177	1416	83.1215
23_GCA_001273795.1_ASM127379v1	74_GCA_000247625.2_ASM24762v2	94.3505	7.55701	1187	1448	81.9751
77_GCA_000283955.1_ASM28395v1	25_GCA_000964675.1_ASM96467v1	94.3399	6.23714	1171	1396	83.8825
74_GCA_000247625.2_ASM24762v2	21_GCA_000284055.1_ASM28405v1	94.3366	7.72814	1187	1448	81.9751
14_SRR5168443_Sanch3	40_SRR2939026_Blapp1	94.332	10.259	1053	1324	79.5317
65_GCA_000283935.1_ASM28393v1	25_GCA_000964675.1_ASM96467v1	94.3295	6.45529	1178	1415	83.2509
52_GCA_000023005.1_ASM2300v1	21_GCA_000284055.1_ASM28405v1	94.32	7.82087	1190	1437	82.8114
23_GCA_001273795.1_ASM127379v1	39_GCA_000021525.1_ASM2152v1	94.3185	7.92414	1180	1512	78.0423
57_GCA_000302635.2_ASM30263v2	25_GCA_000964675.1_ASM96467v1	94.3034	8.93147	1194	1430	83.4965
55_GCA_000221205.1_ASM22120v1	25_GCA_000964675.1_ASM96467v1	94.2963	8.24489	1200	1437	83.5073
64_GCA_000246715.2_ASM24671v2	21_GCA_000284055.1_ASM28405v1	94.2961	8.22425	1181	1416	83.404
40_SRR2939026_Blapp1	14_SRR5168443_Sanch3	94.2947	10.3462	1053	1324	79.5317
21_GCA_000284055.1_ASM28405v1	66_GCA_000166935.1_ASM16693v1	94.2886	8.09951	1180	1407	83.8664
73_GCA_000283795.1_ASM28379v1	25_GCA_000964675.1_ASM96467v1	94.2781	6.43004	1176	1414	83.1683
22_GCA_001442475.1_ASM144247v1	79_GCA_001602635.1_ASM160263v1	94.2752	6.59912	1154	1419	81.3249
33_GCA_000016625.1_ASM1662v1	52_GCA_000023005.1_ASM2300v1	94.2704	8.32323	1216	1437	84.6207
71_GCA_000283835.1_ASM28383v1	25_GCA_000964675.1_ASM96467v1	94.2701	6.43366	1176	1416	83.0508
69_GCA_000831545.1_ASM83154v1	25_GCA_000964675.1_ASM96467v1	94.2691	6.4331	1177	1419	82.9457
53_GCA_000283595.1_ASM28359v1	25_GCA_000964675.1_ASM96467v1	94.2639	8.92413	1196	1436	83.2869
72_GCA_000017445.3_ASM1744v3	25_GCA_000964675.1_ASM96467v1	94.2612	6.45742	1176	1417	82.9922
17_SRR4346295_Gdoso1	14_SRR5168443_Sanch3	94.2609	9.63157	1146	1408	81.392
80_GCA_000263815.1_RcoIs1.0	21_GCA_000284055.1_ASM28405v1	94.2564	7.94863	1182	1489	79.3821
70_GCA_000283815.1_ASM28381v1	25_GCA_000964675.1_ASM96467v1	94.2529	6.46499	1176	1415	83.1095
23_GCA_001273795.1_ASM127379v1	77_GCA_000283955.1_ASM28395v1	94.2507	6.65587	1175	1396	84.1691
64_GCA_000246715.2_ASM24671v2	23_GCA_001273795.1_ASM127379v1	94.2463	8.1971	1177	1416	83.1215
22_GCA_001442475.1_ASM144247v1	81_SRR5308138_Pfluc4	94.2251	6.8258	1156	1400	82.5714
22_GCA_001442475.1_ASM144247v1	24_GCA_000965185.1_ASM96518v1	94.2245	8.67879	1230	1609	76.445
76_GCA_000831525.1_ASM83152v1	25_GCA_000964675.1_ASM96467v1	94.2232	6.51759	1171	1396	83.8825
75_GCA_000018225.1_ASM1822v1	25_GCA_000964675.1_ASM96467v1	94.2227	6.5173	1171	1396	83.8825
52_GCA_000023005.1_ASM2300v1	23_GCA_001273795.1_ASM127379v1	94.2227	7.98834	1188	1437	82.6722
24_GCA_000965185.1_ASM96518v1	22_GCA_001442475.1_ASM144247v1	94.22	8.66335	1230	1609	76.445
81_SRR5308138_Pfluc4	33_GCA_000016625.1_ASM1662v1	94.2176	6.56607	1186	1400	84.7143
23_GCA_001273795.1_ASM127379v1	80_GCA_000263815.1_RcoIs1.0	94.2162	7.91459	1189	1489	79.8522
79_GCA_001602635.1_ASM160263v1	62_GCA_000964905.1_ASM96490v1	94.2143	6.8614	1142	1419	80.4792
38_SRR5909496_Slati1	11_GCA_000964665.1_ASM96466v1	94.2093	11.1986	1102	1341	82.1775
14_SRR5168443_Sanch3	17_SRR4346295_Gdoso1	94.2015	9.70777	1146	1408	81.392
79_GCA_001602635.1_ASM160263v1	33_GCA_000016625.1_ASM1662v1	94.1978	6.56605	1185	1419	83.5095
11_GCA_000964665.1_ASM96466v1	38_SRR5909496_Slati1	94.1957	11.232	1102	1341	82.1775
62_GCA_000964905.1_ASM96490v1	81_SRR5308138_Pfluc4	94.1947	6.94256	1143	1400	81.6429
65_GCA_000283935.1_ASM28393v1	23_GCA_001273795.1_ASM127379v1	94.1936	7.18788	1183	1415	83.6042
62_GCA_000964905.1_ASM96490v1	79_GCA_001602635.1_ASM160263v1	94.1933	6.92023	1142	1419	80.4792
23_GCA_001273795.1_ASM127379v1	66_GCA_000166935.1_ASM16693v1	94.185	8.19744	1176	1407	83.5821
25_GCA_000964675.1_ASM96467v1	24_GCA_000965185.1_ASM96518v1	94.1842	7.97023	1218	1596	76.3158
81_SRR5308138_Pfluc4	59_GCA_000283855.1_ASM28385v1	94.1836	6.94417	1145	1400	81.7857
44_GCA_001051325.1_Rickettsia_aeschlimannii	75_GCA_000018225.1_ASM1822v1	94.1814	7.89357	1141	1396	81.7335
79_GCA_001602635.1_ASM160263v1	59_GCA_000283855.1_ASM28385v1	94.1813	6.92144	1144	1419	80.6202
53_GCA_000283595.1_ASM28359v1	21_GCA_000284055.1_ASM28405v1	94.1806	9.38103	1208	1436	84.1226
44_GCA_001051325.1_Rickettsia_aeschlimannii	58_GCA_000283995.1_ASM28399v1	94.1797	8.39342	1157	1404	82.4074
44_GCA_001051325.1_Rickettsia_aeschlimannii	76_GCA_000831525.1_ASM83152v1	94.1782	7.89715	1141	1396	81.7335
57_GCA_000302635.2_ASM30263v2	21_GCA_000284055.1_ASM28405v1	94.1779	9.42966	1206	1430	84.3357
24_GCA_000965185.1_ASM96518v1	25_GCA_000964675.1_ASM96467v1	94.1768	7.98758	1218	1596	76.3158
17_SRR4346295_Gdoso1	7_GCA_000965005.1_ASM96500v1	94.1479	9.9528	1185	1408	84.1619
71_GCA_000283835.1_ASM28383v1	23_GCA_001273795.1_ASM127379v1	94.1449	7.07227	1180	1416	83.3333
23_GCA_001273795.1_ASM127379v1	73_GCA_000283795.1_ASM28379v1	94.1415	7.09402	1180	1414	83.4512
7_GCA_000965005.1_ASM96500v1	17_SRR4346295_Gdoso1	94.1403	9.97161	1185	1408	84.1619
21_GCA_000284055.1_ASM28405v1	24_GCA_000965185.1_ASM96518v1	94.1351	7.62663	1239	1665	74.4144
23_GCA_001273795.1_ASM127379v1	69_GCA_000831545.1_ASM83154v1	94.1309	7.09542	1181	1419	83.2276
38_SRR5909496_Slati1	45_ERR1359254_Cmasu	94.1308	11.043	1003	1341	74.7949
68_GCA_000283775.1_ASM28377v1	25_GCA_000964675.1_ASM96467v1	94.1307	6.87996	1180	1413	83.5103
23_GCA_001273795.1_ASM127379v1	72_GCA_000017445.3_ASM1744v3	94.1279	7.11339	1180	1417	83.2745
24_GCA_000965185.1_ASM96518v1	21_GCA_000284055.1_ASM28405v1	94.1217	7.67954	1239	1665	74.4144
45_ERR1359254_Cmasu	38_SRR5909496_Slati1	94.1214	11.0422	1003	1341	74.7949
81_SRR5308138_Pfluc4	21_GCA_000284055.1_ASM28405v1	94.1184	6.76495	1154	1400	82.4286
23_GCA_001273795.1_ASM127379v1	68_GCA_000283775.1_ASM28377v1	94.1184	7.05165	1182	1413	83.6518
77_GCA_000283955.1_ASM28395v1	21_GCA_000284055.1_ASM28405v1	94.116	7.22039	1177	1396	84.3123
23_GCA_001273795.1_ASM127379v1	70_GCA_000283815.1_ASM28381v1	94.1156	7.12353	1180	1415	83.3922
44_GCA_001051325.1_Rickettsia_aeschlimannii	24_GCA_000965185.1_ASM96518v1	94.1073	8.44398	1200	1504	79.7872
44_GCA_001051325.1_Rickettsia_aeschlimannii	81_SRR5308138_Pfluc4	94.107	7.30269	1141	1400	81.5
77_GCA_000283955.1_ASM28395v1	44_GCA_001051325.1_Rickettsia_aeschlimannii	94.1039	7.996	1147	1396	82.1633
24_GCA_000965185.1_ASM96518v1	44_GCA_001051325.1_Rickettsia_aeschlimannii	94.0994	8.46584	1200	1504	79.7872
79_GCA_001602635.1_ASM160263v1	21_GCA_000284055.1_ASM28405v1	94.0948	6.76436	1153	1419	81.2544
23_GCA_001273795.1_ASM127379v1	76_GCA_000831525.1_ASM83152v1	94.0917	7.17198	1175	1396	84.1691
75_GCA_000018225.1_ASM1822v1	23_GCA_001273795.1_ASM127379v1	94.0911	7.17642	1175	1396	84.1691
65_GCA_000283935.1_ASM28393v1	21_GCA_000284055.1_ASM28405v1	94.0755	7.62045	1186	1415	83.8163
38_SRR5909496_Slati1	5_GCA_000012145.1_ASM1214v1	94.0737	11.4755	1105	1341	82.4012
5_GCA_000012145.1_ASM1214v1	38_SRR5909496_Slati1	94.0601	11.5078	1105	1341	82.4012
17_SRR4346295_Gdoso1	9_GCA_000012385.1_ASM1238v1	94.0261	10.3357	1191	1408	84.5881
9_GCA_000012385.1_ASM1238v1	17_SRR4346295_Gdoso1	94.0179	10.3839	1191	1408	84.5881
10_SRR5909600_Psono2	43_SRR5378821_Ssp4	94.0168	9.70282	988	1174	84.1567
21_GCA_000284055.1_ASM28405v1	73_GCA_000283795.1_ASM28379v1	94.0096	7.59758	1184	1414	83.7341
71_GCA_000283835.1_ASM28383v1	21_GCA_000284055.1_ASM28405v1	94.007	7.58333	1184	1416	83.6158
43_SRR5378821_Ssp4	10_SRR5909600_Psono2	94.0011	9.73703	988	1174	84.1567
21_GCA_000284055.1_ASM28405v1	69_GCA_000831545.1_ASM83154v1	93.999	7.59943	1185	1419	83.5095
44_GCA_001051325.1_Rickettsia_aeschlimannii	73_GCA_000283795.1_ASM28379v1	93.9975	8.43262	1148	1414	81.1881
17_SRR4346295_Gdoso1	8_GCA_000018245.1_ASM1824v1	93.9968	10.3049	1190	1408	84.517
72_GCA_000017445.3_ASM1744v3	21_GCA_000284055.1_ASM28405v1	93.9964	7.60387	1184	1417	83.5568
23_GCA_001273795.1_ASM127379v1	81_SRR5308138_Pfluc4	93.9906	7.21593	1155	1400	82.5
70_GCA_000283815.1_ASM28381v1	21_GCA_000284055.1_ASM28405v1	93.9902	7.60776	1184	1415	83.6749
44_GCA_001051325.1_Rickettsia_aeschlimannii	65_GCA_000283935.1_ASM28393v1	93.9899	8.87629	1148	1415	81.1307
44_GCA_001051325.1_Rickettsia_aeschlimannii	71_GCA_000283835.1_ASM28383v1	93.9882	8.43356	1149	1416	81.1441
44_GCA_001051325.1_Rickettsia_aeschlimannii	70_GCA_000283815.1_ASM28381v1	93.9876	8.43426	1149	1415	81.2014
44_GCA_001051325.1_Rickettsia_aeschlimannii	69_GCA_000831545.1_ASM83154v1	93.9868	8.43374	1149	1419	80.9725
44_GCA_001051325.1_Rickettsia_aeschlimannii	68_GCA_000283775.1_ASM28377v1	93.9851	8.49657	1149	1413	81.3163
44_GCA_001051325.1_Rickettsia_aeschlimannii	79_GCA_001602635.1_ASM160263v1	93.9833	7.7372	1143	1419	80.5497
8_GCA_000018245.1_ASM1824v1	17_SRR4346295_Gdoso1	93.9829	10.3419	1190	1408	84.517
23_GCA_001273795.1_ASM127379v1	79_GCA_001602635.1_ASM160263v1	93.9749	7.21281	1153	1419	81.2544
68_GCA_000283775.1_ASM28377v1	21_GCA_000284055.1_ASM28405v1	93.9666	7.60742	1185	1413	83.8641
72_GCA_000017445.3_ASM1744v3	44_GCA_001051325.1_Rickettsia_aeschlimannii	93.9646	8.44697	1150	1417	81.1574
43_SRR5378821_Ssp4	19_RiCNE	93.9569	11.2846	953	1174	81.1755
75_GCA_000018225.1_ASM1822v1	21_GCA_000284055.1_ASM28405v1	93.9548	7.68688	1178	1396	84.384
76_GCA_000831525.1_ASM83152v1	21_GCA_000284055.1_ASM28405v1	93.9548	7.68775	1178	1396	84.384
81_SRR5308138_Pfluc4	25_GCA_000964675.1_ASM96467v1	93.9543	7.46899	1156	1400	82.5714
63_GCA_000265225.2_ASM26522v2	8_GCA_000018245.1_ASM1824v1	93.9474	11.1037	1021	1273	80.2042
19_RiCNE	43_SRR5378821_Ssp4	93.9453	11.2804	953	1174	81.1755
23_GCA_001273795.1_ASM127379v1	24_GCA_000965185.1_ASM96518v1	93.9452	8.12005	1234	1634	75.5202
63_GCA_000265225.2_ASM26522v2	9_GCA_000012385.1_ASM1238v1	93.9435	11.1083	1022	1273	80.2828
24_GCA_000965185.1_ASM96518v1	23_GCA_001273795.1_ASM127379v1	93.932	8.1759	1234	1634	75.5202
25_GCA_000964675.1_ASM96467v1	79_GCA_001602635.1_ASM160263v1	93.915	7.51111	1154	1419	81.3249
9_GCA_000012385.1_ASM1238v1	40_SRR2939026_Blapp1	93.9077	11.2195	1089	1324	82.2508
7_GCA_000965005.1_ASM96500v1	40_SRR2939026_Blapp1	93.8953	11.3391	1090	1324	82.3263
40_SRR2939026_Blapp1	9_GCA_000012385.1_ASM1238v1	93.8844	11.2858	1089	1324	82.2508
101_GCA_000277285.1_ASM27728v1	97_GCA_000277225.1_ASM27722v1	93.8841	4.48065	820	870	94.2529
103_GCA_000008045.1_ASM804v1	88_GCA_001602215.1_ASM160221v1	93.8764	4.4666	821	870	94.3678
95_GCA_000277165.1_ASM27716v1	103_GCA_000008045.1_ASM804v1	93.8752	4.47811	821	870	94.3678
103_GCA_000008045.1_ASM804v1	94_GCA_000277205.1_ASM27720v1	93.8728	4.51573	820	870	94.2529
97_GCA_000277225.1_ASM27722v1	103_GCA_000008045.1_ASM804v1	93.8722	4.49506	820	870	94.2529
101_GCA_000277285.1_ASM27728v1	94_GCA_000277205.1_ASM27720v1	93.8721	4.49018	821	870	94.3678
100_GCA_000277305.1_ASM27730v1	94_GCA_000277205.1_ASM27720v1	93.8717	4.48725	821	870	94.3678
63_GCA_000265225.2_ASM26522v2	7_GCA_000965005.1_ASM96500v1	93.8701	11.2415	1018	1273	79.9686
95_GCA_000277165.1_ASM27716v1	101_GCA_000277285.1_ASM27728v1	93.8667	4.48622	822	870	94.4828
103_GCA_000008045.1_ASM804v1	91_GCA_000277185.1_ASM27718v1	93.8665	4.51331	820	870	94.2529
101_GCA_000277285.1_ASM27728v1	91_GCA_000277185.1_ASM27718v1	93.8662	4.48714	821	870	94.3678
101_GCA_000277285.1_ASM27728v1	88_GCA_001602215.1_ASM160221v1	93.8654	4.48505	822	870	94.4828
100_GCA_000277305.1_ASM27730v1	97_GCA_000277225.1_ASM27722v1	93.8643	4.52966	820	870	94.2529
90_GCA_000022785.1_ASM2278v1	103_GCA_000008045.1_ASM804v1	93.8625	4.48515	821	870	94.3678
103_GCA_000008045.1_ASM804v1	92_GCA_000385495.1	93.8611	4.49256	821	870	94.3678
100_GCA_000277305.1_ASM27730v1	95_GCA_000277165.1_ASM27716v1	93.859	4.51764	822	870	94.4828
94_GCA_000277205.1_ASM27720v1	100_GCA_000277305.1_ASM27730v1	93.8581	4.50865	821	870	94.3678
98_GCA_000367405.1_ASM36740v1	103_GCA_000008045.1_ASM804v1	93.8569	4.44914	820	870	94.2529
17_SRR4346295_Gdoso1	20_SRR2939019_Btrans1	93.8556	11.0492	1077	1408	76.4915
90_GCA_000022785.1_ASM2278v1	101_GCA_000277285.1_ASM27728v1	93.8541	4.49316	822	870	94.4828
101_GCA_000277285.1_ASM27728v1	92_GCA_000385495.1	93.8529	4.49732	822	870	94.4828
98_GCA_000367405.1_ASM36740v1	101_GCA_000277285.1_ASM27728v1	93.8496	4.45304	821	870	94.3678
100_GCA_000277305.1_ASM27730v1	90_GCA_000022785.1_ASM2278v1	93.8485	4.52222	822	870	94.4828
100_GCA_000277305.1_ASM27730v1	91_GCA_000277185.1_ASM27718v1	93.8463	4.53598	821	870	94.3678
95_GCA_000277165.1_ASM27716v1	100_GCA_000277305.1_ASM27730v1	93.8462	4.5356	822	870	94.4828
100_GCA_000277305.1_ASM27730v1	88_GCA_001602215.1_ASM160221v1	93.8457	4.53349	822	870	94.4828
11_GCA_000964665.1_ASM96466v1	18_RiTSETSE	93.8437	11.1942	1143	1500	76.2
100_GCA_000277305.1_ASM27730v1	98_GCA_000367405.1_ASM36740v1	93.8437	4.48651	821	870	94.3678
20_SRR2939019_Btrans1	17_SRR4346295_Gdoso1	93.8361	11.0652	1077	1408	76.4915
90_GCA_000022785.1_ASM2278v1	100_GCA_000277305.1_ASM27730v1	93.8335	4.54224	822	870	94.4828
100_GCA_000277305.1_ASM27730v1	92_GCA_000385495.1	93.8331	4.54562	822	870	94.4828
91_GCA_000277185.1_ASM27718v1	100_GCA_000277305.1_ASM27730v1	93.833	4.55607	821	870	94.3678
101_GCA_000277285.1_ASM27728v1	93_GCA_000277265.1_ASM27726v1	93.8309	4.53415	822	870	94.4828
88_GCA_001602215.1_ASM160221v1	100_GCA_000277305.1_ASM27730v1	93.8296	4.55846	822	870	94.4828
98_GCA_000367405.1_ASM36740v1	100_GCA_000277305.1_ASM27730v1	93.8289	4.50284	821	870	94.3678
103_GCA_000008045.1_ASM804v1	89_GCA_000195735.1_ASM19573v1	93.8274	4.57663	821	870	94.3678
93_GCA_000277265.1_ASM27726v1	103_GCA_000008045.1_ASM804v1	93.8267	4.53785	821	870	94.3678
103_GCA_000008045.1_ASM804v1	96_GCA_000277245.1_ASM27724v1	93.8264	4.54498	820	870	94.2529
101_GCA_000277285.1_ASM27728v1	96_GCA_000277245.1_ASM27724v1	93.8199	4.54683	821	870	94.3678
101_GCA_000277285.1_ASM27728v1	102_GCA_000385475.1	93.8176	4.5292	819	870	94.1379
3_Ricimp-plasmids	43_SRR5378821_Ssp4	93.8175	10.0568	972	1174	82.7939
101_GCA_000277285.1_ASM27728v1	89_GCA_000195735.1_ASM19573v1	93.8168	4.59533	822	870	94.4828
103_GCA_000008045.1_ASM804v1	102_GCA_000385475.1	93.8165	4.52927	819	870	94.1379
100_GCA_000277305.1_ASM27730v1	93_GCA_000277265.1_ASM27726v1	93.8111	4.57995	822	870	94.4828
102_GCA_000385475.1	101_GCA_000277285.1_ASM27728v1	93.8098	4.53429	819	870	94.1379
102_GCA_000385475.1	103_GCA_000008045.1_ASM804v1	93.8088	4.53436	819	870	94.1379
100_GCA_000277305.1_ASM27730v1	96_GCA_000277245.1_ASM27724v1	93.8062	4.58726	821	870	94.3678
43_SRR5378821_Ssp4	3_Ricimp-plasmids	93.8055	10.0765	972	1174	82.7939
100_GCA_000277305.1_ASM27730v1	89_GCA_000195735.1_ASM19573v1	93.7972	4.64273	822	870	94.4828
100_GCA_000277305.1_ASM27730v1	102_GCA_000385475.1	93.7954	4.57762	819	870	94.1379
96_GCA_000277245.1_ASM27724v1	100_GCA_000277305.1_ASM27730v1	93.7906	4.61016	821	870	94.3678
103_GCA_000008045.1_ASM804v1	99_GCA_000363905.1_ASM36390v1	93.7761	4.58556	819	870	94.1379
8_GCA_000018245.1_ASM1824v1	40_SRR2939026_Blapp1	93.7674	11.4087	1096	1324	82.7795
101_GCA_000277285.1_ASM27728v1	99_GCA_000363905.1_ASM36390v1	93.7647	4.60582	820	870	94.2529
41_SRR5367914_S2	19_RiCNE	93.7462	11.485	954	1183	80.6424
100_GCA_000277305.1_ASM27730v1	99_GCA_000363905.1_ASM36390v1	93.745	4.65583	820	870	94.2529
40_SRR2939026_Blapp1	8_GCA_000018245.1_ASM1824v1	93.7422	11.4708	1096	1324	82.7795
99_GCA_000363905.1_ASM36390v1	100_GCA_000277305.1_ASM27730v1	93.7385	4.64362	820	870	94.2529
19_RiCNE	41_SRR5367914_S2	93.6951	11.5732	954	1183	80.6424
18_RiTSETSE	5_GCA_000012145.1_ASM1214v1	93.6945	11.1301	1167	1592	73.304
11_GCA_000964665.1_ASM96466v1	31_SRR5259840_Earac4	93.6851	11.8392	1104	1395	79.1398
5_GCA_000012145.1_ASM1214v1	18_RiTSETSE	93.6796	11.1272	1167	1592	73.304
31_SRR5259840_Earac4	11_GCA_000964665.1_ASM96466v1	93.6741	11.8473	1104	1395	79.1398
82_SRR5176627_Gbili3	43_SRR5378821_Ssp4	93.6677	9.19561	924	1174	78.7053
13_GCA_000825685.1_Rickettsia_hoogstraalii_Croatica	38_SRR5909496_Slati1	93.6569	11.7659	1088	1341	81.1335
38_SRR5909496_Slati1	13_GCA_000825685.1_Rickettsia_hoogstraalii_Croatica	93.6568	11.785	1088	1341	81.1335
63_GCA_000265225.2_ASM26522v2	14_SRR5168443_Sanch3	93.6122	11.4257	1001	1273	78.6332
31_SRR5259840_Earac4	45_ERR1359254_Cmasu	93.4953	11.999	1002	1395	71.828
45_ERR1359254_Cmasu	31_SRR5259840_Earac4	93.487	12.004	1002	1395	71.828
31_SRR5259840_Earac4	13_GCA_000825685.1_Rickettsia_hoogstraalii_Croatica	93.4098	11.6682	1093	1395	78.3513
13_GCA_000825685.1_Rickettsia_hoogstraalii_Croatica	31_SRR5259840_Earac4	93.4088	11.6498	1093	1395	78.3513
5_GCA_000012145.1_ASM1214v1	31_SRR5259840_Earac4	93.3631	12.5291	1111	1395	79.6416
31_SRR5259840_Earac4	5_GCA_000012145.1_ASM1214v1	93.3527	12.534	1111	1395	79.6416
38_SRR5909496_Slati1	18_RiTSETSE	93.2582	11.6983	1080	1341	80.5369
18_RiTSETSE	38_SRR5909496_Slati1	93.2559	11.7171	1080	1341	80.5369
10_SRR5909600_Psono2	41_SRR5367914_S2	93.2206	11.1216	990	1183	83.6855
41_SRR5367914_S2	10_SRR5909600_Psono2	93.1989	11.1582	990	1183	83.6855
3_Ricimp-plasmids	41_SRR5367914_S2	93.0993	11.6325	969	1183	81.9104
41_SRR5367914_S2	3_Ricimp-plasmids	93.0931	11.6286	969	1183	81.9104
13_GCA_000825685.1_Rickettsia_hoogstraalii_Croatica	11_GCA_000964665.1_ASM96466v1	93.0586	11.7909	1167	1500	77.8
11_GCA_000964665.1_ASM96466v1	13_GCA_000825685.1_Rickettsia_hoogstraalii_Croatica	93.0551	11.7806	1167	1500	77.8
20_SRR2939019_Btrans1	40_SRR2939026_Blapp1	92.9833	13.1301	1023	1324	77.2659
40_SRR2939026_Blapp1	20_SRR2939019_Btrans1	92.9672	13.1546	1023	1324	77.2659
7_GCA_000965005.1_ASM96500v1	32_SRR5088467_Drufa1	92.9634	10.5714	1169	1515	77.1617
32_SRR5088467_Drufa1	7_GCA_000965005.1_ASM96500v1	92.9538	10.6145	1169	1515	77.1617
51_GCA_000284155.1_ASM28415v1	83_GCA_000018205.1_ASM1820v1	92.9384	7.18981	1068	1298	82.2804
32_SRR5088467_Drufa1	9_GCA_000012385.1_ASM1238v1	92.9319	10.5886	1170	1503	77.8443
9_GCA_000012385.1_ASM1238v1	32_SRR5088467_Drufa1	92.9244	10.578	1170	1503	77.8443
35_SRR3161968_Choog2	9_GCA_000012385.1_ASM1238v1	92.9094	10.2635	1155	1503	76.8463
45_ERR1359254_Cmasu	11_GCA_000964665.1_ASM96466v1	92.903	11.7925	1034	1500	68.9333
7_GCA_000965005.1_ASM96500v1	35_SRR3161968_Choog2	92.9016	10.4889	1158	1515	76.4356
9_GCA_000012385.1_ASM1238v1	35_SRR3161968_Choog2	92.8906	10.3353	1155	1503	76.8463
32_SRR5088467_Drufa1	14_SRR5168443_Sanch3	92.8856	10.6791	1130	1539	73.4243
11_GCA_000964665.1_ASM96466v1	45_ERR1359254_Cmasu	92.8789	11.8199	1034	1500	68.9333
14_SRR5168443_Sanch3	32_SRR5088467_Drufa1	92.8656	10.7047	1130	1539	73.4243
83_GCA_000018205.1_ASM1820v1	50_GCA_000273745.1_Rau1.0	92.8538	7.63068	1069	1298	82.3575
35_SRR3161968_Choog2	14_SRR5168443_Sanch3	92.8304	10.559	1119	1551	72.147
41_SRR5367914_S2	82_SRR5176627_Gbili3	92.8299	11.076	932	1183	78.7828
50_GCA_000273745.1_Rau1.0	83_GCA_000018205.1_ASM1820v1	92.823	7.69496	1069	1298	82.3575
14_SRR5168443_Sanch3	35_SRR3161968_Choog2	92.8133	10.5812	1119	1551	72.147
32_SRR5088467_Drufa1	8_GCA_000018245.1_ASM1824v1	92.8124	10.6869	1170	1539	76.0234
8_GCA_000018245.1_ASM1824v1	32_SRR5088467_Drufa1	92.7868	10.6863	1170	1539	76.0234
13_GCA_000825685.1_Rickettsia_hoogstraalii_Croatica	5_GCA_000012145.1_ASM1214v1	92.7647	12.0135	1187	1572	75.5089
5_GCA_000012145.1_ASM1214v1	13_GCA_000825685.1_Rickettsia_hoogstraalii_Croatica	92.7611	12.004	1187	1572	75.5089
28_SRR6004191_Lappe4	82_SRR5176627_Gbili3	92.758	9.87653	909	1261	72.0856
35_SRR3161968_Choog2	8_GCA_000018245.1_ASM1824v1	92.7438	10.4028	1158	1551	74.6615
8_GCA_000018245.1_ASM1824v1	35_SRR3161968_Choog2	92.7109	10.4722	1158	1551	74.6615
8_GCA_000018245.1_ASM1824v1	104_SRR2043491_Dallo3	92.6577	9.9973	884	1062	83.2392
9_GCA_000012385.1_ASM1238v1	104_SRR2043491_Dallo3	92.6111	10.3467	883	1062	83.145
63_GCA_000265225.2_ASM26522v2	20_SRR2939019_Btrans1	92.5957	13.5575	970	1273	76.198
7_GCA_000965005.1_ASM96500v1	104_SRR2043491_Dallo3	92.5403	10.6174	885	1062	83.3333
13_GCA_000825685.1_Rickettsia_hoogstraalii_Croatica	85_SRR5651504_Econn1	92.4607	11.3013	956	1247	76.664
31_SRR5259840_Earac4	18_RiTSETSE	92.4505	12.9093	1093	1395	78.3513
18_RiTSETSE	31_SRR5259840_Earac4	92.4493	12.9018	1093	1395	78.3513
3_Ricimp-plasmids	28_SRR6004191_Lappe4	92.445	11.7223	990	1325	74.717
17_SRR4346295_Gdoso1	104_SRR2043491_Dallo3	92.4192	10.616	867	1062	81.6384
35_SRR3161968_Choog2	20_SRR2939019_Btrans1	92.3548	11.806	1070	1522	70.3022
20_SRR2939019_Btrans1	35_SRR3161968_Choog2	92.3462	11.8067	1070	1522	70.3022
45_ERR1359254_Cmasu	5_GCA_000012145.1_ASM1214v1	92.3416	12.8015	1047	1510	69.3377
5_GCA_000012145.1_ASM1214v1	45_ERR1359254_Cmasu	92.3186	12.8219	1047	1510	69.3377
2_Riclec	36_RiTBt	92.2788	11.2116	1041	1385	75.1625
32_SRR5088467_Drufa1	20_SRR2939019_Btrans1	92.2704	12.1493	1080	1522	70.9593
20_SRR2939019_Btrans1	32_SRR5088467_Drufa1	92.2549	12.169	1080	1522	70.9593
11_GCA_000964665.1_ASM96466v1	85_SRR5651504_Econn1	92.2191	11.3317	960	1247	76.9848
31_SRR5259840_Earac4	85_SRR5651504_Econn1	92.2149	11.4423	926	1247	74.2582
45_ERR1359254_Cmasu	13_GCA_000825685.1_Rickettsia_hoogstraalii_Croatica	92.1837	13.2619	1035	1510	68.543
104_SRR2043491_Dallo3	63_GCA_000265225.2_ASM26522v2	92.177	10.8698	839	1062	79.0019
13_GCA_000825685.1_Rickettsia_hoogstraalii_Croatica	45_ERR1359254_Cmasu	92.133	13.3277	1035	1510	68.543
28_SRR6004191_Lappe4	10_SRR5909600_Psono2	92.1115	12.8555	995	1325	75.0943
38_SRR5909496_Slati1	85_SRR5651504_Econn1	92.1018	12.3209	949	1247	76.1026
10_SRR5909600_Psono2	28_SRR6004191_Lappe4	92.0872	12.8617	995	1325	75.0943
40_SRR2939026_Blapp1	104_SRR2043491_Dallo3	92.005	11.5218	857	1062	80.6968
14_SRR5168443_Sanch3	104_SRR2043491_Dallo3	91.9847	11.8108	865	1062	81.4501
5_GCA_000012145.1_ASM1214v1	85_SRR5651504_Econn1	91.9776	11.7397	968	1247	77.6263
37_GCA_000499665.2_RMONA_1	85_SRR5651504_Econn1	91.9628	10.1228	923	1247	74.0176
38_SRR5909496_Slati1	37_GCA_000499665.2_RMONA_1	91.9285	11.0086	997	1341	74.3475
37_GCA_000499665.2_RMONA_1	38_SRR5909496_Slati1	91.9137	11.0562	997	1341	74.3475
32_SRR5088467_Drufa1	104_SRR2043491_Dallo3	91.9025	9.61518	860	1062	80.9793
37_GCA_000499665.2_RMONA_1	44_GCA_001051325.1_Rickettsia_aeschlimannii	91.8012	10.3913	1029	1504	68.4176
44_GCA_001051325.1_Rickettsia_aeschlimannii	37_GCA_000499665.2_RMONA_1	91.7904	10.4125	1029	1504	68.4176
26_GCA_000255355.1_ASM25535v1	37_GCA_000499665.2_RMONA_1	91.7774	10.8978	1058	1653	64.0048
37_GCA_000499665.2_RMONA_1	26_GCA_000255355.1_ASM25535v1	91.7619	10.9122	1058	1653	64.0048
45_ERR1359254_Cmasu	18_RiTSETSE	91.7609	13.2142	1026	1510	67.947
37_GCA_000499665.2_RMONA_1	42_GCA_000284175.1_ASM28417v1	91.7548	10.5896	1039	1391	74.6945
37_GCA_000499665.2_RMONA_1	13_GCA_000825685.1_Rickettsia_hoogstraalii_Croatica	91.7513	11.1588	1048	1572	66.6667
18_RiTSETSE	13_GCA_000825685.1_Rickettsia_hoogstraalii_Croatica	91.7331	13.2854	1119	1572	71.1832
42_GCA_000284175.1_ASM28417v1	37_GCA_000499665.2_RMONA_1	91.7306	10.6293	1039	1391	74.6945
13_GCA_000825685.1_Rickettsia_hoogstraalii_Croatica	18_RiTSETSE	91.7257	13.2995	1119	1572	71.1832
13_GCA_000825685.1_Rickettsia_hoogstraalii_Croatica	37_GCA_000499665.2_RMONA_1	91.7141	11.1649	1048	1572	66.6667
37_GCA_000499665.2_RMONA_1	11_GCA_000964665.1_ASM96466v1	91.7057	11.1029	1028	1500	68.5333
11_GCA_000964665.1_ASM96466v1	37_GCA_000499665.2_RMONA_1	91.6966	11.0879	1028	1500	68.5333
37_GCA_000499665.2_RMONA_1	46_GCA_000284075.1_ASM28407v1	91.6346	10.6733	1046	1482	70.5803
37_GCA_000499665.2_RMONA_1	60_GCA_000263055.1_Rho1.0	91.6205	10.4061	1024	1465	69.8976
51_GCA_000284155.1_ASM28415v1	11_GCA_000964665.1_ASM96466v1	91.6118	9.09522	1102	1438	76.6342
35_SRR3161968_Choog2	104_SRR2043491_Dallo3	91.6097	10.2563	858	1062	80.791
85_SRR5651504_Econn1	18_RiTSETSE	91.5756	11.728	934	1247	74.8998
21_GCA_000284055.1_ASM28405v1	37_GCA_000499665.2_RMONA_1	91.5725	10.1032	1042	1662	62.6955
37_GCA_000499665.2_RMONA_1	54_GCA_000252365.1_ASM25236v1	91.5668	11.1171	1041	1441	72.2415
37_GCA_000499665.2_RMONA_1	21_GCA_000284055.1_ASM28405v1	91.5607	10.1163	1042	1662	62.6955
45_ERR1359254_Cmasu	85_SRR5651504_Econn1	91.5524	12.0944	900	1247	72.1732
37_GCA_000499665.2_RMONA_1	56_GCA_000237845.1_ASM23784v1	91.533	11.2127	1042	1442	72.2607
62_GCA_000964905.1_ASM96490v1	37_GCA_000499665.2_RMONA_1	91.5277	11.2274	1012	1419	71.3178
20_SRR2939019_Btrans1	104_SRR2043491_Dallo3	91.5176	12.7878	839	1062	79.0019
11_GCA_000964665.1_ASM96466v1	50_GCA_000273745.1_Rau1.0	91.4996	9.31777	1106	1471	75.1869
37_GCA_000499665.2_RMONA_1	59_GCA_000283855.1_ASM28385v1	91.4714	11.2911	1011	1433	70.5513
33_GCA_000016625.1_ASM1662v1	37_GCA_000499665.2_RMONA_1	91.4546	11.0514	1049	1561	67.2005
37_GCA_000499665.2_RMONA_1	33_GCA_000016625.1_ASM1662v1	91.4393	11.0494	1049	1561	67.2005
37_GCA_000499665.2_RMONA_1	5_GCA_000012145.1_ASM1214v1	91.4295	11.6162	1035	1641	63.0713
5_GCA_000012145.1_ASM1214v1	37_GCA_000499665.2_RMONA_1	91.4205	11.6017	1035	1641	63.0713
39_GCA_000021525.1_ASM2152v1	37_GCA_000499665.2_RMONA_1	91.4005	10.9503	1019	1512	67.3942
37_GCA_000499665.2_RMONA_1	39_GCA_000021525.1_ASM2152v1	91.3915	10.9661	1019	1512	67.3942
37_GCA_000499665.2_RMONA_1	52_GCA_000023005.1_ASM2300v1	91.3789	10.7522	1023	1437	71.19
37_GCA_000499665.2_RMONA_1	78_GCA_000257435.1_RcoIn1.0	91.3769	10.9569	1016	1438	70.6537
37_GCA_000499665.2_RMONA_1	67_GCA_000261325.1_RcoCa1.0	91.3714	10.9183	1019	1489	68.4352
34_GCA_000485845.1_RicGra1.0	37_GCA_000499665.2_RMONA_1	91.3648	11.5583	1062	1562	67.9898
37_GCA_000499665.2_RMONA_1	61_GCA_000007025.1_ASM702v1	91.3539	11.0236	1014	1415	71.6608
37_GCA_000499665.2_RMONA_1	34_GCA_000485845.1_RicGra1.0	91.3311	11.676	1062	1562	67.9898
47_GCA_000284195.1_ASM28419v1	37_GCA_000499665.2_RMONA_1	91.3089	11.0829	1039	1440	72.1528
48_GCA_000965145.1_ASM96514v1	37_GCA_000499665.2_RMONA_1	91.3053	11.1086	1038	1440	72.0833
51_GCA_000284155.1_ASM28415v1	5_GCA_000012145.1_ASM1214v1	91.2983	9.65208	1117	1438	77.6773
82_SRR5176627_Gbili3	19_RiCNE	91.2962	12.1606	938	1261	74.3854
49_GCA_000965075.1_ASM96507v1	37_GCA_000499665.2_RMONA_1	91.2956	11.105	1038	1441	72.0333
23_GCA_001273795.1_ASM127379v1	37_GCA_000499665.2_RMONA_1	91.2933	11.0783	1041	1634	63.7087
37_GCA_000499665.2_RMONA_1	23_GCA_001273795.1_ASM127379v1	91.2852	11.0699	1041	1634	63.7087
37_GCA_000499665.2_RMONA_1	47_GCA_000284195.1_ASM28419v1	91.2758	11.1363	1039	1440	72.1528
37_GCA_000499665.2_RMONA_1	48_GCA_000965145.1_ASM96514v1	91.2757	11.1546	1038	1440	72.0833
37_GCA_000499665.2_RMONA_1	49_GCA_000965075.1_ASM96507v1	91.275	11.1431	1038	1441	72.0333
22_GCA_001442475.1_ASM144247v1	37_GCA_000499665.2_RMONA_1	91.2193	11.5634	1050	1609	65.2579
51_GCA_000284155.1_ASM28415v1	13_GCA_000825685.1_Rickettsia_hoogstraalii_Croatica	91.2132	10.801	1107	1438	76.9819
37_GCA_000499665.2_RMONA_1	22_GCA_001442475.1_ASM144247v1	91.1955	11.5755	1050	1609	65.2579
57_GCA_000302635.2_ASM30263v2	37_GCA_000499665.2_RMONA_1	91.1844	11.5144	1042	1430	72.8671
10_SRR5909600_Psono2	19_RiCNE	91.1691	13.3752	1011	1407	71.855
24_GCA_000965185.1_ASM96518v1	37_GCA_000499665.2_RMONA_1	91.165	11.453	1052	1662	63.2972
37_GCA_000499665.2_RMONA_1	24_GCA_000965185.1_ASM96518v1	91.1635	11.4443	1052	1662	63.2972
19_RiCNE	10_SRR5909600_Psono2	91.1492	13.3984	1011	1407	71.855
50_GCA_000273745.1_Rau1.0	13_GCA_000825685.1_Rickettsia_hoogstraalii_Croatica	91.1378	10.9815	1114	1471	75.7308
25_GCA_000964675.1_ASM96467v1	37_GCA_000499665.2_RMONA_1	91.1344	11.3713	1045	1596	65.4762
37_GCA_000499665.2_RMONA_1	25_GCA_000964675.1_ASM96467v1	91.1287	11.3717	1045	1596	65.4762
37_GCA_000499665.2_RMONA_1	58_GCA_000283995.1_ASM28399v1	91.124	11.0589	1021	1404	72.7208
53_GCA_000283595.1_ASM28359v1	37_GCA_000499665.2_RMONA_1	91.1204	11.6123	1041	1436	72.493
50_GCA_000273745.1_Rau1.0	5_GCA_000012145.1_ASM1214v1	91.1177	10.0515	1124	1471	76.4106
37_GCA_000499665.2_RMONA_1	31_SRR5259840_Earac4	91.0846	12.1434	998	1395	71.5412
31_SRR5259840_Earac4	37_GCA_000499665.2_RMONA_1	91.0725	12.142	998	1395	71.5412
38_SRR5909496_Slati1	50_GCA_000273745.1_Rau1.0	91.0691	11.2188	1043	1341	77.7778
50_GCA_000273745.1_Rau1.0	38_SRR5909496_Slati1	91.067	11.2023	1043	1341	77.7778
37_GCA_000499665.2_RMONA_1	55_GCA_000221205.1_ASM22120v1	91.0466	11.5745	1040	1437	72.373
51_GCA_000284155.1_ASM28415v1	38_SRR5909496_Slati1	91.0159	11.2195	1046	1341	78.0015
19_RiCNE	3_Ricimp-plasmids	91.0154	13.198	1013	1430	70.8392
37_GCA_000499665.2_RMONA_1	66_GCA_000166935.1_ASM16693v1	91.0081	11.4451	1026	1407	72.9211
31_SRR5259840_Earac4	50_GCA_000273745.1_Rau1.0	91.0047	11.0851	1032	1395	73.9785
3_Ricimp-plasmids	19_RiCNE	91.0011	13.2308	1013	1430	70.8392
50_GCA_000273745.1_Rau1.0	31_SRR5259840_Earac4	90.9962	11.0687	1032	1395	73.9785
64_GCA_000246715.2_ASM24671v2	37_GCA_000499665.2_RMONA_1	90.9678	11.5039	1032	1416	72.8814
37_GCA_000499665.2_RMONA_1	74_GCA_000247625.2_ASM24762v2	90.9628	11.5939	1022	1448	70.5801
42_GCA_000284175.1_ASM28417v1	85_SRR5651504_Econn1	90.9364	10.7865	950	1247	76.1828
51_GCA_000284155.1_ASM28415v1	31_SRR5259840_Earac4	90.9338	11.1479	1031	1395	73.9068
37_GCA_000499665.2_RMONA_1	80_GCA_000263815.1_RcoIs1.0	90.8996	11.9992	1020	1489	68.5024
44_GCA_001051325.1_Rickettsia_aeschlimannii	85_SRR5651504_Econn1	90.8295	10.8361	940	1247	75.3809
54_GCA_000252365.1_ASM25236v1	85_SRR5651504_Econn1	90.7918	11.2408	943	1247	75.6215
85_SRR5651504_Econn1	54_GCA_000252365.1_ASM25236v1	90.7887	11.2302	943	1247	75.6215
42_GCA_000284175.1_ASM28417v1	11_GCA_000964665.1_ASM96466v1	90.7832	11.1831	1090	1391	78.3609
11_GCA_000964665.1_ASM96466v1	42_GCA_000284175.1_ASM28417v1	90.7824	11.1322	1090	1391	78.3609
56_GCA_000237845.1_ASM23784v1	85_SRR5651504_Econn1	90.7818	11.2258	944	1247	75.7017
85_SRR5651504_Econn1	56_GCA_000237845.1_ASM23784v1	90.7805	11.2059	944	1247	75.7017
53_GCA_000283595.1_ASM28359v1	85_SRR5651504_Econn1	90.7686	10.9179	946	1247	75.8621
37_GCA_000499665.2_RMONA_1	45_ERR1359254_Cmasu	90.7301	12.5901	962	1510	63.7086
46_GCA_000284075.1_ASM28407v1	85_SRR5651504_Econn1	90.7299	10.9967	955	1247	76.5838
19_RiCNE	28_SRR6004191_Lappe4	90.717	13.9793	959	1325	72.3774
45_ERR1359254_Cmasu	37_GCA_000499665.2_RMONA_1	90.7122	12.5809	962	1510	63.7086
57_GCA_000302635.2_ASM30263v2	85_SRR5651504_Econn1	90.7051	11.1024	948	1247	76.0225
13_GCA_000825685.1_Rickettsia_hoogstraalii_Croatica	44_GCA_001051325.1_Rickettsia_aeschlimannii	90.693	11.1858	1120	1504	74.4681
44_GCA_001051325.1_Rickettsia_aeschlimannii	13_GCA_000825685.1_Rickettsia_hoogstraalii_Croatica	90.6908	11.1899	1120	1504	74.4681
11_GCA_000964665.1_ASM96466v1	57_GCA_000302635.2_ASM30263v2	90.688	10.9533	1088	1430	76.0839
42_GCA_000284175.1_ASM28417v1	13_GCA_000825685.1_Rickettsia_hoogstraalii_Croatica	90.6668	11.8953	1102	1391	79.2236
57_GCA_000302635.2_ASM30263v2	5_GCA_000012145.1_ASM1214v1	90.6572	11.0646	1089	1430	76.1538
13_GCA_000825685.1_Rickettsia_hoogstraalii_Croatica	42_GCA_000284175.1_ASM28417v1	90.647	11.8894	1102	1391	79.2236
11_GCA_000964665.1_ASM96466v1	56_GCA_000237845.1_ASM23784v1	90.6407	11.0428	1102	1442	76.4216
85_SRR5651504_Econn1	33_GCA_000016625.1_ASM1662v1	90.6274	11.2776	960	1247	76.9848
53_GCA_000283595.1_ASM28359v1	11_GCA_000964665.1_ASM96466v1	90.6249	11.025	1087	1436	75.6964
13_GCA_000825685.1_Rickettsia_hoogstraalii_Croatica	46_GCA_000284075.1_ASM28407v1	90.6236	11.6624	1093	1482	73.7517
11_GCA_000964665.1_ASM96466v1	54_GCA_000252365.1_ASM25236v1	90.6028	11.0998	1101	1441	76.4053
11_GCA_000964665.1_ASM96466v1	60_GCA_000263055.1_Rho1.0	90.5947	10.8509	1091	1465	74.471
5_GCA_000012145.1_ASM1214v1	56_GCA_000237845.1_ASM23784v1	90.5858	11.1669	1104	1442	76.5603
85_SRR5651504_Econn1	21_GCA_000284055.1_ASM28405v1	90.5811	10.745	951	1247	76.263
37_GCA_000499665.2_RMONA_1	77_GCA_000283955.1_ASM28395v1	90.5802	12.0492	1026	1396	73.4957
53_GCA_000283595.1_ASM28359v1	5_GCA_000012145.1_ASM1214v1	90.5691	11.1669	1088	1436	75.766
57_GCA_000302635.2_ASM30263v2	13_GCA_000825685.1_Rickettsia_hoogstraalii_Croatica	90.5602	12.0755	1081	1430	75.5944
11_GCA_000964665.1_ASM96466v1	55_GCA_000221205.1_ASM22120v1	90.5594	10.7887	1089	1437	75.7829
62_GCA_000964905.1_ASM96490v1	85_SRR5651504_Econn1	90.5517	11.4521	939	1247	75.3007
42_GCA_000284175.1_ASM28417v1	5_GCA_000012145.1_ASM1214v1	90.5492	11.6569	1096	1391	78.7922
5_GCA_000012145.1_ASM1214v1	54_GCA_000252365.1_ASM25236v1	90.548	11.2231	1103	1441	76.5441
5_GCA_000012145.1_ASM1214v1	42_GCA_000284175.1_ASM28417v1	90.5471	11.6122	1096	1391	78.7922
37_GCA_000499665.2_RMONA_1	65_GCA_000283935.1_ASM28393v1	90.5413	12.2535	1026	1415	72.5088
5_GCA_000012145.1_ASM1214v1	60_GCA_000263055.1_Rho1.0	90.5388	10.9808	1093	1465	74.6075
51_GCA_000284155.1_ASM28415v1	85_SRR5651504_Econn1	90.5339	10.7857	945	1247	75.7819
22_GCA_001442475.1_ASM144247v1	85_SRR5651504_Econn1	90.5332	11.2309	959	1247	76.9046
50_GCA_000273745.1_Rau1.0	85_SRR5651504_Econn1	90.5273	10.8231	952	1247	76.3432
11_GCA_000964665.1_ASM96466v1	67_GCA_000261325.1_RcoCa1.0	90.527	10.8182	1079	1489	72.4647
37_GCA_000499665.2_RMONA_1	76_GCA_000831525.1_ASM83152v1	90.5266	12.1395	1028	1396	73.639
37_GCA_000499665.2_RMONA_1	75_GCA_000018225.1_ASM1822v1	90.5253	12.1405	1028	1396	73.639
85_SRR5651504_Econn1	55_GCA_000221205.1_ASM22120v1	90.5228	11.1165	952	1247	76.3432
58_GCA_000283995.1_ASM28399v1	85_SRR5651504_Econn1	90.5214	10.6746	942	1247	75.5413
62_GCA_000964905.1_ASM96490v1	11_GCA_000964665.1_ASM96466v1	90.5141	11.2466	1082	1419	76.2509
85_SRR5651504_Econn1	59_GCA_000283855.1_ASM28385v1	90.497	11.5887	940	1247	75.3809
64_GCA_000246715.2_ASM24671v2	85_SRR5651504_Econn1	90.4967	11.2033	941	1247	75.4611
53_GCA_000283595.1_ASM28359v1	13_GCA_000825685.1_Rickettsia_hoogstraalii_Croatica	90.4945	12.0867	1084	1436	75.4875
85_SRR5651504_Econn1	58_GCA_000283995.1_ASM28399v1	90.4845	10.6713	942	1247	75.5413
38_SRR5909496_Slati1	42_GCA_000284175.1_ASM28417v1	90.4834	12.0897	1055	1341	78.6726
23_GCA_001273795.1_ASM127379v1	85_SRR5651504_Econn1	90.4808	11.112	952	1247	76.3432
13_GCA_000825685.1_Rickettsia_hoogstraalii_Croatica	55_GCA_000221205.1_ASM22120v1	90.4802	11.7835	1089	1437	75.7829
42_GCA_000284175.1_ASM28417v1	38_SRR5909496_Slati1	90.4735	12.1175	1055	1341	78.6726
85_SRR5651504_Econn1	49_GCA_000965075.1_ASM96507v1	90.4663	11.5073	950	1247	76.1828
46_GCA_000284075.1_ASM28407v1	11_GCA_000964665.1_ASM96466v1	90.462	11.3669	1096	1482	73.9541
11_GCA_000964665.1_ASM96466v1	59_GCA_000283855.1_ASM28385v1	90.4617	11.4117	1081	1433	75.4361
85_SRR5651504_Econn1	66_GCA_000166935.1_ASM16693v1	90.4587	11.1907	938	1247	75.2205
85_SRR5651504_Econn1	26_GCA_000255355.1_ASM25535v1	90.4567	11.6511	970	1247	77.7867
11_GCA_000964665.1_ASM96466v1	34_GCA_000485845.1_RicGra1.0	90.4563	11.6454	1127	1500	75.1333
85_SRR5651504_Econn1	34_GCA_000485845.1_RicGra1.0	90.4555	11.7657	962	1247	77.1451
13_GCA_000825685.1_Rickettsia_hoogstraalii_Croatica	33_GCA_000016625.1_ASM1662v1	90.4506	11.7286	1132	1561	72.5176
49_GCA_000965075.1_ASM96507v1	85_SRR5651504_Econn1	90.4499	11.5325	950	1247	76.1828
11_GCA_000964665.1_ASM96466v1	80_GCA_000263815.1_RcoIs1.0	90.4398	11.0325	1066	1489	71.5917
11_GCA_000964665.1_ASM96466v1	46_GCA_000284075.1_ASM28407v1	90.4373	11.3893	1096	1482	73.9541
62_GCA_000964905.1_ASM96490v1	5_GCA_000012145.1_ASM1214v1	90.4299	11.4304	1084	1419	76.3918
85_SRR5651504_Econn1	25_GCA_000964675.1_ASM96467v1	90.4255	11.0757	954	1247	76.5036
38_SRR5909496_Slati1	54_GCA_000252365.1_ASM25236v1	90.4249	12.3588	1054	1341	78.5981
47_GCA_000284195.1_ASM28419v1	85_SRR5651504_Econn1	90.4209	11.5963	951	1247	76.263
11_GCA_000964665.1_ASM96466v1	61_GCA_000007025.1_ASM702v1	90.4149	11.2022	1076	1415	76.0424
11_GCA_000964665.1_ASM96466v1	48_GCA_000965145.1_ASM96514v1	90.4112	11.3676	1090	1440	75.6944
37_GCA_000499665.2_RMONA_1	68_GCA_000283775.1_ASM28377v1	90.4072	12.3962	1029	1413	72.8238
11_GCA_000964665.1_ASM96466v1	49_GCA_000965075.1_ASM96507v1	90.4052	11.3341	1089	1441	75.5725
11_GCA_000964665.1_ASM96466v1	47_GCA_000284195.1_ASM28419v1	90.4042	11.3766	1090	1440	75.6944
37_GCA_000499665.2_RMONA_1	81_SRR5308138_Pfluc4	90.402	12.1256	1017	1400	72.6429
72_GCA_000017445.3_ASM1744v3	37_GCA_000499665.2_RMONA_1	90.3979	12.3104	1030	1417	72.6888
11_GCA_000964665.1_ASM96466v1	78_GCA_000257435.1_RcoIn1.0	90.3958	11.279	1070	1438	74.4089
37_GCA_000499665.2_RMONA_1	71_GCA_000283835.1_ASM28383v1	90.3917	12.3425	1030	1416	72.7401
26_GCA_000255355.1_ASM25535v1	38_SRR5909496_Slati1	90.3854	12.528	1055	1341	78.6726
67_GCA_000261325.1_RcoCa1.0	5_GCA_000012145.1_ASM1214v1	90.3853	11.1666	1082	1489	72.6662
78_GCA_000257435.1_RcoIn1.0	13_GCA_000825685.1_Rickettsia_hoogstraalii_Croatica	90.3834	11.7401	1087	1438	75.5911
37_GCA_000499665.2_RMONA_1	70_GCA_000283815.1_ASM28381v1	90.3827	12.3417	1030	1415	72.7915
24_GCA_000965185.1_ASM96518v1	85_SRR5651504_Econn1	90.3785	11.1221	963	1247	77.2253
37_GCA_000499665.2_RMONA_1	69_GCA_000831545.1_ASM83154v1	90.3735	12.3483	1031	1419	72.6568
37_GCA_000499665.2_RMONA_1	73_GCA_000283795.1_ASM28379v1	90.3715	12.3808	1030	1414	72.843
64_GCA_000246715.2_ASM24671v2	11_GCA_000964665.1_ASM96466v1	90.3605	11.4795	1074	1416	75.8475
38_SRR5909496_Slati1	26_GCA_000255355.1_ASM25535v1	90.3591	12.5469	1055	1341	78.6726
13_GCA_000825685.1_Rickettsia_hoogstraalii_Croatica	56_GCA_000237845.1_ASM23784v1	90.3583	12.2951	1109	1442	76.9071
67_GCA_000261325.1_RcoCa1.0	13_GCA_000825685.1_Rickettsia_hoogstraalii_Croatica	90.3581	11.7809	1084	1489	72.8005
37_GCA_000499665.2_RMONA_1	79_GCA_001602635.1_ASM160263v1	90.3576	12.1253	1019	1419	71.8111
46_GCA_000284075.1_ASM28407v1	38_SRR5909496_Slati1	90.3559	12.2224	1052	1341	78.4489
38_SRR5909496_Slati1	56_GCA_000237845.1_ASM23784v1	90.3558	12.4672	1056	1341	78.7472
5_GCA_000012145.1_ASM1214v1	55_GCA_000221205.1_ASM22120v1	90.3552	11.2451	1094	1437	76.1308
26_GCA_000255355.1_ASM25535v1	13_GCA_000825685.1_Rickettsia_hoogstraalii_Croatica	90.3535	12.3062	1122	1572	71.374
80_GCA_000263815.1_RcoIs1.0	5_GCA_000012145.1_ASM1214v1	90.3493	11.2088	1068	1489	71.726
85_SRR5651504_Econn1	48_GCA_000965145.1_ASM96514v1	90.3408	11.7137	952	1247	76.3432
13_GCA_000825685.1_Rickettsia_hoogstraalii_Croatica	54_GCA_000252365.1_ASM25236v1	90.3358	12.3259	1108	1441	76.891
11_GCA_000964665.1_ASM96466v1	66_GCA_000166935.1_ASM16693v1	90.3314	11.4137	1074	1407	76.3326
78_GCA_000257435.1_RcoIn1.0	5_GCA_000012145.1_ASM1214v1	90.3305	11.4382	1072	1438	74.548
38_SRR5909496_Slati1	46_GCA_000284075.1_ASM28407v1	90.3264	12.2943	1052	1341	78.4489
13_GCA_000825685.1_Rickettsia_hoogstraalii_Croatica	59_GCA_000283855.1_ASM28385v1	90.3204	12.0633	1092	1433	76.2038
26_GCA_000255355.1_ASM25535v1	11_GCA_000964665.1_ASM96466v1	90.3169	12.034	1111	1500	74.0667
13_GCA_000825685.1_Rickettsia_hoogstraalii_Croatica	26_GCA_000255355.1_ASM25535v1	90.3148	12.332	1122	1572	71.374
11_GCA_000964665.1_ASM96466v1	26_GCA_000255355.1_ASM25535v1	90.3104	12.0204	1111	1500	74.0667
51_GCA_000284155.1_ASM28415v1	45_ERR1359254_Cmasu	90.2997	11.833	990	1438	68.8456
61_GCA_000007025.1_ASM702v1	5_GCA_000012145.1_ASM1214v1	90.2977	11.5046	1079	1415	76.2544
46_GCA_000284075.1_ASM28407v1	5_GCA_000012145.1_ASM1214v1	90.2951	11.5382	1104	1482	74.4939
5_GCA_000012145.1_ASM1214v1	34_GCA_000485845.1_RicGra1.0	90.2834	11.8012	1138	1562	72.8553
85_SRR5651504_Econn1	78_GCA_000257435.1_RcoIn1.0	90.2801	11.8554	944	1247	75.7017
22_GCA_001442475.1_ASM144247v1	13_GCA_000825685.1_Rickettsia_hoogstraalii_Croatica	90.274	12.1488	1112	1572	70.7379
11_GCA_000964665.1_ASM96466v1	33_GCA_000016625.1_ASM1662v1	90.271	12.0038	1101	1500	73.4
5_GCA_000012145.1_ASM1214v1	46_GCA_000284075.1_ASM28407v1	90.2706	11.5598	1104	1482	74.4939
13_GCA_000825685.1_Rickettsia_hoogstraalii_Croatica	22_GCA_001442475.1_ASM144247v1	90.2625	12.1562	1112	1572	70.7379
11_GCA_000964665.1_ASM96466v1	58_GCA_000283995.1_ASM28399v1	90.2555	11.0385	1079	1404	76.8519
78_GCA_000257435.1_RcoIn1.0	85_SRR5651504_Econn1	90.2533	11.8846	944	1247	75.7017
13_GCA_000825685.1_Rickettsia_hoogstraalii_Croatica	58_GCA_000283995.1_ASM28399v1	90.2525	11.6288	1078	1404	76.7806
5_GCA_000012145.1_ASM1214v1	59_GCA_000283855.1_ASM28385v1	90.2497	11.7305	1089	1433	75.9944
64_GCA_000246715.2_ASM24671v2	5_GCA_000012145.1_ASM1214v1	90.2489	11.6961	1078	1416	76.1299
37_GCA_000499665.2_RMONA_1	18_RiTSETSE	90.2436	12.4274	1017	1592	63.8819
74_GCA_000247625.2_ASM24762v2	85_SRR5651504_Econn1	90.2392	11.6389	949	1247	76.1026
11_GCA_000964665.1_ASM96466v1	77_GCA_000283955.1_ASM28395v1	90.239	11.0653	1076	1396	77.0774
64_GCA_000246715.2_ASM24671v2	13_GCA_000825685.1_Rickettsia_hoogstraalii_Croatica	90.2337	12.107	1082	1416	76.4124
5_GCA_000012145.1_ASM1214v1	66_GCA_000166935.1_ASM16693v1	90.2236	11.6322	1078	1407	76.6169
62_GCA_000964905.1_ASM96490v1	13_GCA_000825685.1_Rickettsia_hoogstraalii_Croatica	90.2205	12.3121	1084	1419	76.3918
13_GCA_000825685.1_Rickettsia_hoogstraalii_Croatica	74_GCA_000247625.2_ASM24762v2	90.211	12.104	1074	1448	74.1713
11_GCA_000964665.1_ASM96466v1	74_GCA_000247625.2_ASM24762v2	90.2066	11.4453	1082	1448	74.7238
5_GCA_000012145.1_ASM1214v1	74_GCA_000247625.2_ASM24762v2	90.201	11.4388	1084	1448	74.8619
38_SRR5909496_Slati1	33_GCA_000016625.1_ASM1662v1	90.1969	12.4712	1057	1341	78.8218
11_GCA_000964665.1_ASM96466v1	65_GCA_000283935.1_ASM28393v1	90.1927	10.9434	1081	1415	76.3958
13_GCA_000825685.1_Rickettsia_hoogstraalii_Croatica	66_GCA_000166935.1_ASM16693v1	90.1918	12.1684	1080	1407	76.7591
33_GCA_000016625.1_ASM1662v1	38_SRR5909496_Slati1	90.1911	12.4577	1057	1341	78.8218
26_GCA_000255355.1_ASM25535v1	42_GCA_000284175.1_ASM28417v1	90.1866	11.5578	1118	1391	80.3738
61_GCA_000007025.1_ASM702v1	13_GCA_000825685.1_Rickettsia_hoogstraalii_Croatica	90.1842	12.209	1087	1415	76.8198
13_GCA_000825685.1_Rickettsia_hoogstraalii_Croatica	80_GCA_000263815.1_RcoIs1.0	90.1793	12.1285	1071	1489	71.9275
38_SRR5909496_Slati1	66_GCA_000166935.1_ASM16693v1	90.1778	12.1919	1039	1341	77.4795
38_SRR5909496_Slati1	55_GCA_000221205.1_ASM22120v1	90.1773	12.4665	1050	1341	78.2998
74_GCA_000247625.2_ASM24762v2	38_SRR5909496_Slati1	90.1757	11.9879	1048	1341	78.1506
34_GCA_000485845.1_RicGra1.0	13_GCA_000825685.1_Rickettsia_hoogstraalii_Croatica	90.1706	12.3825	1149	1562	73.5595
5_GCA_000012145.1_ASM1214v1	48_GCA_000965145.1_ASM96514v1	90.1656	11.8782	1096	1440	76.1111
5_GCA_000012145.1_ASM1214v1	49_GCA_000965075.1_ASM96507v1	90.1626	11.8393	1095	1441	75.9889
39_GCA_000021525.1_ASM2152v1	85_SRR5651504_Econn1	90.1625	11.9751	952	1247	76.3432
5_GCA_000012145.1_ASM1214v1	47_GCA_000284195.1_ASM28419v1	90.1587	11.8867	1096	1440	76.1111
42_GCA_000284175.1_ASM28417v1	26_GCA_000255355.1_ASM25535v1	90.1553	11.5859	1118	1391	80.3738
60_GCA_000263055.1_Rho1.0	85_SRR5651504_Econn1	90.1518	12.1539	955	1247	76.5838
11_GCA_000964665.1_ASM96466v1	75_GCA_000018225.1_ASM1822v1	90.1515	11.1217	1076	1396	77.0774
61_GCA_000007025.1_ASM702v1	85_SRR5651504_Econn1	90.1507	12.1014	951	1247	76.263
85_SRR5651504_Econn1	61_GCA_000007025.1_ASM702v1	90.1505	12.0864	951	1247	76.263
31_SRR5259840_Earac4	56_GCA_000237845.1_ASM23784v1	90.1501	12.5032	1044	1395	74.8387
46_GCA_000284075.1_ASM28407v1	31_SRR5259840_Earac4	90.1492	12.113	1033	1395	74.0502
11_GCA_000964665.1_ASM96466v1	76_GCA_000831525.1_ASM83152v1	90.1451	11.1322	1076	1396	77.0774
85_SRR5651504_Econn1	60_GCA_000263055.1_Rho1.0	90.1399	12.1418	955	1247	76.5838
38_SRR5909496_Slati1	59_GCA_000283855.1_ASM28385v1	90.1396	12.4075	1040	1341	77.5541
21_GCA_000284055.1_ASM28405v1	13_GCA_000825685.1_Rickettsia_hoogstraalii_Croatica	90.1356	11.955	1141	1572	72.5827
13_GCA_000825685.1_Rickettsia_hoogstraalii_Croatica	21_GCA_000284055.1_ASM28405v1	90.1355	11.958	1141	1572	72.5827
11_GCA_000964665.1_ASM96466v1	83_GCA_000018205.1_ASM1820v1	90.1336	9.66104	1045	1298	80.5085
13_GCA_000825685.1_Rickettsia_hoogstraalii_Croatica	34_GCA_000485845.1_RicGra1.0	90.1323	12.4157	1149	1562	73.5595
45_ERR1359254_Cmasu	42_GCA_000284175.1_ASM28417v1	90.1322	11.776	989	1391	71.0999
42_GCA_000284175.1_ASM28417v1	31_SRR5259840_Earac4	90.1294	12.6225	1058	1391	76.0604
31_SRR5259840_Earac4	42_GCA_000284175.1_ASM28417v1	90.1279	12.5825	1058	1391	76.0604
57_GCA_000302635.2_ASM30263v2	45_ERR1359254_Cmasu	90.1278	11.7427	991	1430	69.3007
31_SRR5259840_Earac4	46_GCA_000284075.1_ASM28407v1	90.1182	12.0998	1033	1395	74.0502
52_GCA_000023005.1_ASM2300v1	85_SRR5651504_Econn1	90.1098	12.2122	941	1247	75.4611
64_GCA_000246715.2_ASM24671v2	38_SRR5909496_Slati1	90.1084	12.2626	1045	1341	77.9269
11_GCA_000964665.1_ASM96466v1	68_GCA_000283775.1_ASM28377v1	90.1052	11.2188	1082	1413	76.5747
77_GCA_000283955.1_ASM28395v1	5_GCA_000012145.1_ASM1214v1	90.1008	11.4367	1079	1396	77.2923
62_GCA_000964905.1_ASM96490v1	38_SRR5909496_Slati1	90.1005	12.444	1043	1341	77.7778
39_GCA_000021525.1_ASM2152v1	13_GCA_000825685.1_Rickettsia_hoogstraalii_Croatica	90.0968	12.5427	1075	1512	71.0979
85_SRR5651504_Econn1	67_GCA_000261325.1_RcoCa1.0	90.0941	12.0947	950	1247	76.1828
13_GCA_000825685.1_Rickettsia_hoogstraalii_Croatica	39_GCA_000021525.1_ASM2152v1	90.0936	12.5085	1075	1512	71.0979
47_GCA_000284195.1_ASM28419v1	38_SRR5909496_Slati1	90.0915	12.4866	1053	1341	78.5235
24_GCA_000965185.1_ASM96518v1	13_GCA_000825685.1_Rickettsia_hoogstraalii_Croatica	90.0874	12.4312	1119	1572	71.1832
31_SRR5259840_Earac4	54_GCA_000252365.1_ASM25236v1	90.0845	12.65	1045	1395	74.9104
11_GCA_000964665.1_ASM96466v1	69_GCA_000831545.1_ASM83154v1	90.0842	11.3282	1081	1419	76.1804
13_GCA_000825685.1_Rickettsia_hoogstraalii_Croatica	24_GCA_000965185.1_ASM96518v1	90.0823	12.4045	1119	1572	71.1832
60_GCA_000263055.1_Rho1.0	13_GCA_000825685.1_Rickettsia_hoogstraalii_Croatica	90.0817	12.5057	1098	1465	74.9488
11_GCA_000964665.1_ASM96466v1	71_GCA_000283835.1_ASM28383v1	90.0807	11.3325	1082	1416	76.4124
5_GCA_000012145.1_ASM1214v1	58_GCA_000283995.1_ASM28399v1	90.075	11.4261	1083	1404	77.1368
75_GCA_000018225.1_ASM1822v1	13_GCA_000825685.1_Rickettsia_hoogstraalii_Croatica	90.0741	11.6853	1071	1396	76.7192
5_GCA_000012145.1_ASM1214v1	65_GCA_000283935.1_ASM28393v1	90.0703	11.2392	1083	1415	76.5371
22_GCA_001442475.1_ASM144247v1	11_GCA_000964665.1_ASM96466v1	90.07	12.1824	1094	1500	72.9333
38_SRR5909496_Slati1	47_GCA_000284195.1_ASM28419v1	90.0681	12.5002	1053	1341	78.5235
39_GCA_000021525.1_ASM2152v1	11_GCA_000964665.1_ASM96466v1	90.0679	11.8972	1084	1500	72.2667
13_GCA_000825685.1_Rickettsia_hoogstraalii_Croatica	76_GCA_000831525.1_ASM83152v1	90.0677	11.6708	1071	1396	76.7192
85_SRR5651504_Econn1	52_GCA_000023005.1_ASM2300v1	90.0676	12.2946	941	1247	75.4611
71_GCA_000283835.1_ASM28383v1	13_GCA_000825685.1_Rickettsia_hoogstraalii_Croatica	90.0653	11.7087	1076	1416	75.9887
11_GCA_000964665.1_ASM96466v1	39_GCA_000021525.1_ASM2152v1	90.0652	11.9155	1084	1500	72.2667
38_SRR5909496_Slati1	48_GCA_000965145.1_ASM96514v1	90.0649	12.4965	1053	1341	78.5235
11_GCA_000964665.1_ASM96466v1	22_GCA_001442475.1_ASM144247v1	90.0611	12.1917	1094	1500	72.9333
11_GCA_000964665.1_ASM96466v1	70_GCA_000283815.1_ASM28381v1	90.0611	11.3991	1082	1415	76.4664
38_SRR5909496_Slati1	49_GCA_000965075.1_ASM96507v1	90.06	12.4832	1052	1341	78.4489
11_GCA_000964665.1_ASM96466v1	73_GCA_000283795.1_ASM28379v1	90.0573	11.4501	1081	1414	76.4498
13_GCA_000825685.1_Rickettsia_hoogstraalii_Croatica	70_GCA_000283815.1_ASM28381v1	90.0571	11.6923	1076	1415	76.0424
13_GCA_000825685.1_Rickettsia_hoogstraalii_Croatica	69_GCA_000831545.1_ASM83154v1	90.0569	11.6848	1076	1419	75.828
11_GCA_000964665.1_ASM96466v1	72_GCA_000017445.3_ASM1744v3	90.0543	11.4174	1082	1417	76.3585
13_GCA_000825685.1_Rickettsia_hoogstraalii_Croatica	73_GCA_000283795.1_ASM28379v1	90.0522	11.707	1076	1414	76.0962
22_GCA_001442475.1_ASM144247v1	38_SRR5909496_Slati1	90.0489	13.0401	1048	1341	78.1506
13_GCA_000825685.1_Rickettsia_hoogstraalii_Croatica	77_GCA_000283955.1_ASM28395v1	90.0483	11.7302	1072	1396	76.7908
5_GCA_000012145.1_ASM1214v1	83_GCA_000018205.1_ASM1820v1	90.0482	9.82473	1046	1298	80.5855
13_GCA_000825685.1_Rickettsia_hoogstraalii_Croatica	72_GCA_000017445.3_ASM1744v3	90.0454	11.7035	1076	1417	75.9351
11_GCA_000964665.1_ASM96466v1	44_GCA_001051325.1_Rickettsia_aeschlimannii	90.0341	11.9884	1085	1500	72.3333
13_GCA_000825685.1_Rickettsia_hoogstraalii_Croatica	68_GCA_000283775.1_ASM28377v1	90.0188	11.7674	1076	1413	76.15
38_SRR5909496_Slati1	22_GCA_001442475.1_ASM144247v1	90.0188	13.1001	1048	1341	78.1506
38_SRR5909496_Slati1	44_GCA_001051325.1_Rickettsia_aeschlimannii	90.0088	12.6428	1040	1341	77.5541
75_GCA_000018225.1_ASM1822v1	5_GCA_000012145.1_ASM1214v1	90.0066	11.5078	1079	1396	77.2923
5_GCA_000012145.1_ASM1214v1	68_GCA_000283775.1_ASM28377v1	90.0049	11.4451	1084	1413	76.7162
13_GCA_000825685.1_Rickettsia_hoogstraalii_Croatica	23_GCA_001273795.1_ASM127379v1	89.9989	12.2271	1134	1572	72.1374
76_GCA_000831525.1_ASM83152v1	5_GCA_000012145.1_ASM1214v1	89.9979	11.5219	1079	1396	77.2923
23_GCA_001273795.1_ASM127379v1	13_GCA_000825685.1_Rickettsia_hoogstraalii_Croatica	89.9973	12.2309	1134	1572	72.1374
48_GCA_000965145.1_ASM96514v1	13_GCA_000825685.1_Rickettsia_hoogstraalii_Croatica	89.9969	12.5124	1102	1440	76.5278
44_GCA_001051325.1_Rickettsia_aeschlimannii	38_SRR5909496_Slati1	89.9939	12.722	1040	1341	77.5541
26_GCA_000255355.1_ASM25535v1	5_GCA_000012145.1_ASM1214v1	89.9926	12.306	1132	1641	68.9823
45_ERR1359254_Cmasu	56_GCA_000237845.1_ASM23784v1	89.9876	11.9509	992	1442	68.7933
11_GCA_000964665.1_ASM96466v1	81_SRR5308138_Pfluc4	89.9875	10.9259	1068	1400	76.2857
5_GCA_000012145.1_ASM1214v1	26_GCA_000255355.1_ASM25535v1	89.9873	12.2898	1132	1641	68.9823
53_GCA_000283595.1_ASM28359v1	45_ERR1359254_Cmasu	89.9788	11.9686	993	1436	69.1504
72_GCA_000017445.3_ASM1744v3	85_SRR5651504_Econn1	89.974	11.8115	948	1247	76.0225
45_ERR1359254_Cmasu	54_GCA_000252365.1_ASM25236v1	89.9661	11.963	992	1441	68.8411
24_GCA_000965185.1_ASM96518v1	11_GCA_000964665.1_ASM96466v1	89.9659	11.9437	1105	1500	73.6667
11_GCA_000964665.1_ASM96466v1	24_GCA_000965185.1_ASM96518v1	89.965	11.9382	1105	1500	73.6667
62_GCA_000964905.1_ASM96490v1	45_ERR1359254_Cmasu	89.9641	12.0446	965	1419	68.0056
11_GCA_000964665.1_ASM96466v1	23_GCA_001273795.1_ASM127379v1	89.9628	12.1064	1098	1500	73.2
11_GCA_000964665.1_ASM96466v1	79_GCA_001602635.1_ASM160263v1	89.9628	10.9289	1069	1419	75.3347
77_GCA_000283955.1_ASM28395v1	85_SRR5651504_Econn1	89.9612	11.7567	948	1247	76.0225
5_GCA_000012145.1_ASM1214v1	70_GCA_000283815.1_ASM28381v1	89.9609	11.6211	1084	1415	76.6078
51_GCA_000284155.1_ASM28415v1	37_GCA_000499665.2_RMONA_1	89.9587	11.3254	1014	1438	70.5146
5_GCA_000012145.1_ASM1214v1	72_GCA_000017445.3_ASM1744v3	89.9541	11.639	1084	1417	76.4996
25_GCA_000964675.1_ASM96467v1	13_GCA_000825685.1_Rickettsia_hoogstraalii_Croatica	89.9526	12.2278	1129	1572	71.8193
38_SRR5909496_Slati1	61_GCA_000007025.1_ASM702v1	89.9501	12.5323	1049	1341	78.2252
45_ERR1359254_Cmasu	50_GCA_000273745.1_Rau1.0	89.9489	12.4814	1003	1471	68.1849
49_GCA_000965075.1_ASM96507v1	13_GCA_000825685.1_Rickettsia_hoogstraalii_Croatica	89.9443	12.6286	1101	1441	76.4053
13_GCA_000825685.1_Rickettsia_hoogstraalii_Croatica	25_GCA_000964675.1_ASM96467v1	89.9378	12.2493	1129	1572	71.8193
80_GCA_000263815.1_RcoIs1.0	38_SRR5909496_Slati1	89.9369	12.6565	1036	1341	77.2558
80_GCA_000263815.1_RcoIs1.0	85_SRR5651504_Econn1	89.9359	12.5498	945	1247	75.7819
85_SRR5651504_Econn1	73_GCA_000283795.1_ASM28379v1	89.9351	11.8357	946	1247	75.8621
57_GCA_000302635.2_ASM30263v2	38_SRR5909496_Slati1	89.935	12.8613	1058	1341	78.8963
13_GCA_000825685.1_Rickettsia_hoogstraalii_Croatica	47_GCA_000284195.1_ASM28419v1	89.9326	12.6142	1103	1440	76.5972
50_GCA_000273745.1_Rau1.0	45_ERR1359254_Cmasu	89.9307	12.5038	1003	1471	68.1849
5_GCA_000012145.1_ASM1214v1	69_GCA_000831545.1_ASM83154v1	89.9294	11.6852	1084	1419	76.3918
85_SRR5651504_Econn1	80_GCA_000263815.1_RcoIs1.0	89.9288	12.5381	945	1247	75.7819
53_GCA_000283595.1_ASM28359v1	38_SRR5909496_Slati1	89.9268	12.801	1058	1341	78.8963
5_GCA_000012145.1_ASM1214v1	71_GCA_000283835.1_ASM28383v1	89.926	11.689	1085	1416	76.6243
5_GCA_000012145.1_ASM1214v1	33_GCA_000016625.1_ASM1662v1	89.9244	12.5844	1116	1561	71.4926
23_GCA_001273795.1_ASM127379v1	11_GCA_000964665.1_ASM96466v1	89.924	12.2228	1098	1500	73.2
70_GCA_000283815.1_ASM28381v1	85_SRR5651504_Econn1	89.9175	11.9034	949	1247	76.1026
33_GCA_000016625.1_ASM1662v1	31_SRR5259840_Earac4	89.9172	12.2864	1062	1395	76.129
5_GCA_000012145.1_ASM1214v1	73_GCA_000283795.1_ASM28379v1	89.9026	11.8027	1084	1414	76.662
71_GCA_000283835.1_ASM28383v1	85_SRR5651504_Econn1	89.9	11.9158	949	1247	76.1026
34_GCA_000485845.1_RicGra1.0	31_SRR5259840_Earac4	89.8971	12.7733	1060	1395	75.9857
31_SRR5259840_Earac4	33_GCA_000016625.1_ASM1662v1	89.895	12.2939	1062	1395	76.129
11_GCA_000964665.1_ASM96466v1	25_GCA_000964675.1_ASM96467v1	89.89	12.1948	1096	1500	73.0667
50_GCA_000273745.1_Rau1.0	37_GCA_000499665.2_RMONA_1	89.8897	11.6001	1016	1471	69.0687
67_GCA_000261325.1_RcoCa1.0	38_SRR5909496_Slati1	89.8884	12.6586	1053	1341	78.5235
37_GCA_000499665.2_RMONA_1	50_GCA_000273745.1_Rau1.0	89.8884	11.5985	1016	1471	69.0687
65_GCA_000283935.1_ASM28393v1	85_SRR5651504_Econn1	89.8881	11.8073	950	1247	76.1828
38_SRR5909496_Slati1	78_GCA_000257435.1_RcoIn1.0	89.8856	12.6763	1047	1341	78.0761
85_SRR5651504_Econn1	70_GCA_000283815.1_ASM28381v1	89.8838	11.905	949	1247	76.1026
76_GCA_000831525.1_ASM83152v1	85_SRR5651504_Econn1	89.8757	11.9427	950	1247	76.1828
11_GCA_000964665.1_ASM96466v1	52_GCA_000023005.1_ASM2300v1	89.8692	12.3559	1084	1437	75.4349
85_SRR5651504_Econn1	69_GCA_000831545.1_ASM83154v1	89.8677	11.8902	951	1247	76.263
58_GCA_000283995.1_ASM28399v1	26_GCA_000255355.1_ASM25535v1	89.8637	11.0398	1106	1404	78.7749
85_SRR5651504_Econn1	65_GCA_000283935.1_ASM28393v1	89.8603	11.7953	950	1247	76.1828
34_GCA_000485845.1_RicGra1.0	38_SRR5909496_Slati1	89.8518	13.2836	1073	1341	80.0149
26_GCA_000255355.1_ASM25535v1	31_SRR5259840_Earac4	89.8506	12.6373	1073	1395	76.9176
38_SRR5909496_Slati1	34_GCA_000485845.1_RicGra1.0	89.8503	13.2741	1073	1341	80.0149
39_GCA_000021525.1_ASM2152v1	38_SRR5909496_Slati1	89.8497	13.1434	1043	1341	77.7778
31_SRR5259840_Earac4	34_GCA_000485845.1_RicGra1.0	89.8494	12.8554	1060	1395	75.9857
25_GCA_000964675.1_ASM96467v1	11_GCA_000964665.1_ASM96466v1	89.8446	12.3031	1096	1500	73.0667
65_GCA_000283935.1_ASM28393v1	13_GCA_000825685.1_Rickettsia_hoogstraalii_Croatica	89.8445	12.4252	1080	1415	76.3251
38_SRR5909496_Slati1	60_GCA_000263055.1_Rho1.0	89.8441	12.9239	1058	1341	78.8963
85_SRR5651504_Econn1	75_GCA_000018225.1_ASM1822v1	89.8413	11.9397	950	1247	76.1828
26_GCA_000255355.1_ASM25535v1	44_GCA_001051325.1_Rickettsia_aeschlimannii	89.8386	11.8273	1124	1504	74.734
68_GCA_000283775.1_ASM28377v1	85_SRR5651504_Econn1	89.8376	11.9878	950	1247	76.1828
44_GCA_001051325.1_Rickettsia_aeschlimannii	26_GCA_000255355.1_ASM25535v1	89.8344	11.7788	1124	1504	74.734
45_ERR1359254_Cmasu	58_GCA_000283995.1_ASM28399v1	89.834	11.399	974	1404	69.3732
39_GCA_000021525.1_ASM2152v1	5_GCA_000012145.1_ASM1214v1	89.8325	12.2934	1096	1512	72.4868
31_SRR5259840_Earac4	67_GCA_000261325.1_RcoCa1.0	89.8229	12.4677	1030	1395	73.8351
5_GCA_000012145.1_ASM1214v1	44_GCA_001051325.1_Rickettsia_aeschlimannii	89.8224	12.126	1101	1504	73.2048
51_GCA_000284155.1_ASM28415v1	18_RiTSETSE	89.8199	11.5137	1078	1438	74.9652
31_SRR5259840_Earac4	26_GCA_000255355.1_ASM25535v1	89.8163	12.6393	1073	1395	76.9176
38_SRR5909496_Slati1	39_GCA_000021525.1_ASM2152v1	89.8131	13.177	1043	1341	77.7778
85_SRR5651504_Econn1	68_GCA_000283775.1_ASM28377v1	89.8032	11.9878	950	1247	76.1828
31_SRR5259840_Earac4	59_GCA_000283855.1_ASM28385v1	89.7923	12.4786	1027	1395	73.6201
62_GCA_000964905.1_ASM96490v1	31_SRR5259840_Earac4	89.7858	12.4671	1029	1395	73.7634
11_GCA_000964665.1_ASM96466v1	21_GCA_000284055.1_ASM28405v1	89.774	12.4418	1110	1500	74
22_GCA_001442475.1_ASM144247v1	31_SRR5259840_Earac4	89.7709	12.5618	1054	1395	75.5556
45_ERR1359254_Cmasu	49_GCA_000965075.1_ASM96507v1	89.7701	11.6439	994	1441	68.9799
26_GCA_000255355.1_ASM25535v1	46_GCA_000284075.1_ASM28407v1	89.77	11.8858	1131	1482	76.3158
81_SRR5308138_Pfluc4	5_GCA_000012145.1_ASM1214v1	89.7633	11.424	1073	1400	76.6429
13_GCA_000825685.1_Rickettsia_hoogstraalii_Croatica	81_SRR5308138_Pfluc4	89.7563	12.0408	1070	1400	76.4286
21_GCA_000284055.1_ASM28405v1	11_GCA_000964665.1_ASM96466v1	89.7563	12.4434	1110	1500	74
5_GCA_000012145.1_ASM1214v1	79_GCA_001602635.1_ASM160263v1	89.7539	11.3676	1074	1419	75.6871
13_GCA_000825685.1_Rickettsia_hoogstraalii_Croatica	79_GCA_001602635.1_ASM160263v1	89.7532	12.0101	1069	1419	75.3347
56_GCA_000237845.1_ASM23784v1	26_GCA_000255355.1_ASM25535v1	89.7482	12.3097	1129	1442	78.294
39_GCA_000021525.1_ASM2152v1	31_SRR5259840_Earac4	89.7466	12.8965	1035	1395	74.1935
31_SRR5259840_Earac4	39_GCA_000021525.1_ASM2152v1	89.7409	12.8581	1035	1395	74.1935
31_SRR5259840_Earac4	22_GCA_001442475.1_ASM144247v1	89.7402	12.533	1054	1395	75.5556
85_SRR5651504_Econn1	83_GCA_000018205.1_ASM1820v1	89.7305	10.2438	896	1247	71.8524
31_SRR5259840_Earac4	61_GCA_000007025.1_ASM702v1	89.7242	12.7499	1037	1395	74.3369
46_GCA_000284075.1_ASM28407v1	26_GCA_000255355.1_ASM25535v1	89.7237	11.9393	1131	1482	76.3158
24_GCA_000965185.1_ASM96518v1	38_SRR5909496_Slati1	89.7215	13.2087	1060	1341	79.0455
72_GCA_000017445.3_ASM1744v3	38_SRR5909496_Slati1	89.7193	12.7023	1041	1341	77.6286
83_GCA_000018205.1_ASM1820v1	85_SRR5651504_Econn1	89.7163	10.2726	896	1247	71.8524
54_GCA_000252365.1_ASM25236v1	26_GCA_000255355.1_ASM25535v1	89.711	12.3913	1130	1441	78.4178
62_GCA_000964905.1_ASM96490v1	26_GCA_000255355.1_ASM25535v1	89.711	11.8323	1108	1419	78.0832
38_SRR5909496_Slati1	24_GCA_000965185.1_ASM96518v1	89.6999	13.2206	1060	1341	79.0455
38_SRR5909496_Slati1	70_GCA_000283815.1_ASM28381v1	89.6969	12.6841	1041	1341	77.6286
22_GCA_001442475.1_ASM144247v1	5_GCA_000012145.1_ASM1214v1	89.6966	12.754	1109	1609	68.9248
65_GCA_000283935.1_ASM28393v1	38_SRR5909496_Slati1	89.694	12.8777	1042	1341	77.7032
81_SRR5308138_Pfluc4	85_SRR5651504_Econn1	89.6831	12.1158	942	1247	75.5413
5_GCA_000012145.1_ASM1214v1	22_GCA_001442475.1_ASM144247v1	89.6824	12.7839	1109	1609	68.9248
52_GCA_000023005.1_ASM2300v1	38_SRR5909496_Slati1	89.6817	12.8726	1051	1341	78.3743
31_SRR5259840_Earac4	74_GCA_000247625.2_ASM24762v2	89.6817	12.5407	1030	1395	73.8351
45_ERR1359254_Cmasu	59_GCA_000283855.1_ASM28385v1	89.6816	12.5934	969	1433	67.6204
45_ERR1359254_Cmasu	47_GCA_000284195.1_ASM28419v1	89.6812	11.8332	996	1440	69.1667
64_GCA_000246715.2_ASM24671v2	31_SRR5259840_Earac4	89.6795	12.6774	1028	1395	73.6918
26_GCA_000255355.1_ASM25535v1	25_GCA_000964675.1_ASM96467v1	89.6786	11.6706	1127	1596	70.614
5_GCA_000012145.1_ASM1214v1	52_GCA_000023005.1_ASM2300v1	89.6781	12.6484	1092	1437	75.9916
85_SRR5651504_Econn1	79_GCA_001602635.1_ASM160263v1	89.6773	12.0592	942	1247	75.5413
48_GCA_000965145.1_ASM96514v1	45_ERR1359254_Cmasu	89.6708	11.8273	994	1440	69.0278
79_GCA_001602635.1_ASM160263v1	85_SRR5651504_Econn1	89.6698	12.1094	942	1247	75.5413
45_ERR1359254_Cmasu	48_GCA_000965145.1_ASM96514v1	89.6682	11.8408	994	1440	69.0278
25_GCA_000964675.1_ASM96467v1	26_GCA_000255355.1_ASM25535v1	89.6662	11.6772	1127	1596	70.614
26_GCA_000255355.1_ASM25535v1	66_GCA_000166935.1_ASM16693v1	89.6576	11.6151	1115	1407	79.2466
71_GCA_000283835.1_ASM28383v1	38_SRR5909496_Slati1	89.6543	12.8108	1044	1341	77.8523
50_GCA_000273745.1_Rau1.0	18_RiTSETSE	89.6514	11.7445	1089	1471	74.0313
52_GCA_000023005.1_ASM2300v1	13_GCA_000825685.1_Rickettsia_hoogstraalii_Croatica	89.6459	13.0895	1100	1437	76.5484
31_SRR5259840_Earac4	66_GCA_000166935.1_ASM16693v1	89.6443	12.8712	1025	1395	73.4767
38_SRR5909496_Slati1	73_GCA_000283795.1_ASM28379v1	89.6394	12.8208	1043	1341	77.7778
38_SRR5909496_Slati1	58_GCA_000283995.1_ASM28399v1	89.6272	13.0563	1045	1341	77.9269
38_SRR5909496_Slati1	69_GCA_000831545.1_ASM83154v1	89.6258	12.7862	1045	1341	77.9269
64_GCA_000246715.2_ASM24671v2	26_GCA_000255355.1_ASM25535v1	89.6241	11.6831	1117	1416	78.8842
21_GCA_000284055.1_ASM28405v1	38_SRR5909496_Slati1	89.6132	13.2395	1054	1341	78.5981
45_ERR1359254_Cmasu	55_GCA_000221205.1_ASM22120v1	89.6101	12.4136	1000	1437	69.5894
39_GCA_000021525.1_ASM2152v1	26_GCA_000255355.1_ASM25535v1	89.6031	12.0607	1109	1512	73.3466
31_SRR5259840_Earac4	55_GCA_000221205.1_ASM22120v1	89.5989	12.8648	1047	1395	75.0538
38_SRR5909496_Slati1	21_GCA_000284055.1_ASM28405v1	89.5957	13.2707	1054	1341	78.5981
26_GCA_000255355.1_ASM25535v1	39_GCA_000021525.1_ASM2152v1	89.5933	12.1104	1109	1512	73.3466
45_ERR1359254_Cmasu	70_GCA_000283815.1_ASM28381v1	89.5853	11.6351	977	1415	69.0459
38_SRR5909496_Slati1	76_GCA_000831525.1_ASM83152v1	89.5847	12.9595	1038	1341	77.4049
38_SRR5909496_Slati1	75_GCA_000018225.1_ASM1822v1	89.584	12.9592	1038	1341	77.4049
26_GCA_000255355.1_ASM25535v1	34_GCA_000485845.1_RicGra1.0	89.5829	12.6746	1152	1562	73.7516
38_SRR5909496_Slati1	68_GCA_000283775.1_ASM28377v1	89.5818	12.9106	1045	1341	77.9269
72_GCA_000017445.3_ASM1744v3	45_ERR1359254_Cmasu	89.5722	11.7183	977	1417	68.9485
45_ERR1359254_Cmasu	60_GCA_000263055.1_Rho1.0	89.5713	12.3624	988	1465	67.4403
34_GCA_000485845.1_RicGra1.0	26_GCA_000255355.1_ASM25535v1	89.5685	12.6168	1152	1562	73.7516
18_RiTSETSE	54_GCA_000252365.1_ASM25236v1	89.5676	11.8423	1069	1441	74.1846
12_SRR5170144_Pante1	10_SRR5909600_Psono2	89.5671	10.9326	1035	1375	75.2727
31_SRR5259840_Earac4	78_GCA_000257435.1_RcoIn1.0	89.5648	13.0093	1032	1395	73.9785
45_ERR1359254_Cmasu	74_GCA_000247625.2_ASM24762v2	89.5603	11.9692	977	1448	67.4724
5_GCA_000012145.1_ASM1214v1	25_GCA_000964675.1_ASM96467v1	89.5555	12.7308	1107	1596	69.3609
13_GCA_000825685.1_Rickettsia_hoogstraalii_Croatica	83_GCA_000018205.1_ASM1820v1	89.5526	12.1093	1035	1298	79.7381
31_SRR5259840_Earac4	60_GCA_000263055.1_Rho1.0	89.5513	13.0502	1044	1395	74.8387
10_SRR5909600_Psono2	12_SRR5170144_Pante1	89.5474	11.0169	1035	1375	75.2727
31_SRR5259840_Earac4	49_GCA_000965075.1_ASM96507v1	89.5454	12.861	1052	1395	75.4122
25_GCA_000964675.1_ASM96467v1	38_SRR5909496_Slati1	89.5433	13.525	1050	1341	78.2998
38_SRR5909496_Slati1	25_GCA_000964675.1_ASM96467v1	89.5416	13.5632	1050	1341	78.2998
45_ERR1359254_Cmasu	66_GCA_000166935.1_ASM16693v1	89.5388	12.2408	985	1407	70.0071
45_ERR1359254_Cmasu	73_GCA_000283795.1_ASM28379v1	89.5378	11.754	978	1414	69.1655
49_GCA_000965075.1_ASM96507v1	31_SRR5259840_Earac4	89.5372	12.9241	1052	1395	75.4122
77_GCA_000283955.1_ASM28395v1	26_GCA_000255355.1_ASM25535v1	89.5353	11.7233	1107	1396	79.298
18_RiTSETSE	56_GCA_000237845.1_ASM23784v1	89.5311	11.936	1070	1442	74.2025
77_GCA_000283955.1_ASM28395v1	38_SRR5909496_Slati1	89.5265	13.1453	1041	1341	77.6286
64_GCA_000246715.2_ASM24671v2	45_ERR1359254_Cmasu	89.5257	12.2513	986	1416	69.6328
38_SRR5909496_Slati1	81_SRR5308138_Pfluc4	89.5218	12.435	1032	1341	76.9575
31_SRR5259840_Earac4	47_GCA_000284195.1_ASM28419v1	89.5212	12.9831	1053	1395	75.4839
45_ERR1359254_Cmasu	34_GCA_000485845.1_RicGra1.0	89.516	12.7787	1020	1510	67.5497
25_GCA_000964675.1_ASM96467v1	5_GCA_000012145.1_ASM1214v1	89.5159	12.8263	1107	1596	69.3609
31_SRR5259840_Earac4	48_GCA_000965145.1_ASM96514v1	89.5155	12.9854	1052	1395	75.4122
48_GCA_000965145.1_ASM96514v1	31_SRR5259840_Earac4	89.5148	13.0489	1052	1395	75.4122
47_GCA_000284195.1_ASM28419v1	31_SRR5259840_Earac4	89.5121	13.0481	1053	1395	75.4839
26_GCA_000255355.1_ASM25535v1	59_GCA_000283855.1_ASM28385v1	89.5112	12.2926	1116	1433	77.8786
83_GCA_000018205.1_ASM1820v1	38_SRR5909496_Slati1	89.5102	11.6597	1010	1298	77.812
45_ERR1359254_Cmasu	69_GCA_000831545.1_ASM83154v1	89.5028	11.7668	980	1419	69.0627
76_GCA_000831525.1_ASM83152v1	26_GCA_000255355.1_ASM25535v1	89.502	11.7683	1105	1396	79.1547
53_GCA_000283595.1_ASM28359v1	31_SRR5259840_Earac4	89.5005	13.2787	1050	1395	75.2688
45_ERR1359254_Cmasu	71_GCA_000283835.1_ASM28383v1	89.4999	11.7774	980	1416	69.209
38_SRR5909496_Slati1	79_GCA_001602635.1_ASM160263v1	89.4902	12.4311	1033	1341	77.0321
26_GCA_000255355.1_ASM25535v1	75_GCA_000018225.1_ASM1822v1	89.4816	11.8105	1105	1396	79.1547
57_GCA_000302635.2_ASM30263v2	31_SRR5259840_Earac4	89.4799	13.3873	1049	1395	75.1971
53_GCA_000283595.1_ASM28359v1	26_GCA_000255355.1_ASM25535v1	89.4714	12.1706	1132	1436	78.8301
18_RiTSETSE	59_GCA_000283855.1_ASM28385v1	89.4644	11.9219	1054	1433	73.552
62_GCA_000964905.1_ASM96490v1	18_RiTSETSE	89.4631	12.0089	1050	1419	73.9958
45_ERR1359254_Cmasu	75_GCA_000018225.1_ASM1822v1	89.463	12.0043	975	1396	69.8424
45_ERR1359254_Cmasu	76_GCA_000831525.1_ASM83152v1	89.4623	12.0078	975	1396	69.8424
31_SRR5259840_Earac4	44_GCA_001051325.1_Rickettsia_aeschlimannii	89.462	13.2437	1030	1395	73.8351
57_GCA_000302635.2_ASM30263v2	26_GCA_000255355.1_ASM25535v1	89.4552	12.335	1134	1430	79.3007
44_GCA_001051325.1_Rickettsia_aeschlimannii	31_SRR5259840_Earac4	89.4467	13.347	1030	1395	73.8351
80_GCA_000263815.1_RcoIs1.0	31_SRR5259840_Earac4	89.4465	13.3021	1021	1395	73.19
25_GCA_000964675.1_ASM96467v1	31_SRR5259840_Earac4	89.4431	13.1564	1059	1395	75.914
26_GCA_000255355.1_ASM25535v1	49_GCA_000965075.1_ASM96507v1	89.4344	12.2866	1130	1441	78.4178
68_GCA_000283775.1_ASM28377v1	26_GCA_000255355.1_ASM25535v1	89.4315	11.8733	1112	1413	78.6978
31_SRR5259840_Earac4	25_GCA_000964675.1_ASM96467v1	89.4284	13.1596	1059	1395	75.914
31_SRR5259840_Earac4	52_GCA_000023005.1_ASM2300v1	89.4164	13.151	1040	1395	74.552
49_GCA_000965075.1_ASM96507v1	26_GCA_000255355.1_ASM25535v1	89.4132	12.3151	1130	1441	78.4178
65_GCA_000283935.1_ASM28393v1	26_GCA_000255355.1_ASM25535v1	89.4058	11.8627	1117	1415	78.9399
26_GCA_000255355.1_ASM25535v1	47_GCA_000284195.1_ASM28419v1	89.4057	12.3172	1131	1440	78.5417
31_SRR5259840_Earac4	58_GCA_000283995.1_ASM28399v1	89.4015	13.0745	1038	1395	74.4086
26_GCA_000255355.1_ASM25535v1	48_GCA_000965145.1_ASM96514v1	89.4011	12.3062	1132	1440	78.6111
45_ERR1359254_Cmasu	26_GCA_000255355.1_ASM25535v1	89.3983	13.0986	1031	1510	68.2781
45_ERR1359254_Cmasu	78_GCA_000257435.1_RcoIn1.0	89.3977	12.6611	977	1438	67.9416
26_GCA_000255355.1_ASM25535v1	45_ERR1359254_Cmasu	89.3965	13.1505	1031	1510	68.2781
45_ERR1359254_Cmasu	67_GCA_000261325.1_RcoCa1.0	89.389	12.6942	978	1489	65.6817
47_GCA_000284195.1_ASM28419v1	26_GCA_000255355.1_ASM25535v1	89.3849	12.3436	1131	1440	78.5417
48_GCA_000965145.1_ASM96514v1	26_GCA_000255355.1_ASM25535v1	89.3799	12.3345	1132	1440	78.6111
24_GCA_000965185.1_ASM96518v1	5_GCA_000012145.1_ASM1214v1	89.3721	12.8918	1126	1641	68.6167
5_GCA_000012145.1_ASM1214v1	24_GCA_000965185.1_ASM96518v1	89.3707	12.8895	1126	1641	68.6167
45_ERR1359254_Cmasu	68_GCA_000283775.1_ASM28377v1	89.3622	12.088	983	1413	69.5683
80_GCA_000263815.1_RcoIs1.0	26_GCA_000255355.1_ASM25535v1	89.3586	12.1525	1116	1489	74.9496
77_GCA_000283955.1_ASM28395v1	45_ERR1359254_Cmasu	89.3567	12.2779	975	1396	69.8424
78_GCA_000257435.1_RcoIn1.0	26_GCA_000255355.1_ASM25535v1	89.3474	12.3994	1114	1438	77.4687
46_GCA_000284075.1_ASM28407v1	18_RiTSETSE	89.3388	12.0122	1080	1482	72.8745
23_GCA_001273795.1_ASM127379v1	38_SRR5909496_Slati1	89.3341	13.8393	1058	1341	78.8963
21_GCA_000284055.1_ASM28405v1	31_SRR5259840_Earac4	89.3338	13.1651	1060	1395	75.9857
38_SRR5909496_Slati1	23_GCA_001273795.1_ASM127379v1	89.3321	13.8653	1058	1341	78.8963
26_GCA_000255355.1_ASM25535v1	60_GCA_000263055.1_Rho1.0	89.3295	12.612	1132	1465	77.2696
53_GCA_000283595.1_ASM28359v1	18_RiTSETSE	89.3242	12.4834	1061	1436	73.8858
26_GCA_000255355.1_ASM25535v1	21_GCA_000284055.1_ASM28405v1	89.3206	12.194	1157	1653	69.994
80_GCA_000263815.1_RcoIs1.0	45_ERR1359254_Cmasu	89.3183	12.856	965	1489	64.8086
24_GCA_000965185.1_ASM96518v1	31_SRR5259840_Earac4	89.3154	13.0747	1081	1395	77.491
64_GCA_000246715.2_ASM24671v2	18_RiTSETSE	89.3153	12.037	1047	1416	73.9407
21_GCA_000284055.1_ASM28405v1	26_GCA_000255355.1_ASM25535v1	89.3148	12.1798	1157	1653	69.994
47_GCA_000284195.1_ASM28419v1	18_RiTSETSE	89.3139	12.1471	1064	1440	73.8889
18_RiTSETSE	61_GCA_000007025.1_ASM702v1	89.3119	12.0304	1047	1415	73.9929
74_GCA_000247625.2_ASM24762v2	26_GCA_000255355.1_ASM25535v1	89.3117	12.4714	1116	1448	77.0718
21_GCA_000284055.1_ASM28405v1	5_GCA_000012145.1_ASM1214v1	89.3092	12.7861	1141	1641	69.5308
67_GCA_000261325.1_RcoCa1.0	26_GCA_000255355.1_ASM25535v1	89.3073	12.1725	1125	1489	75.5541
5_GCA_000012145.1_ASM1214v1	21_GCA_000284055.1_ASM28405v1	89.3061	12.7975	1141	1641	69.5308
31_SRR5259840_Earac4	24_GCA_000965185.1_ASM96518v1	89.3046	13.0538	1081	1395	77.491
49_GCA_000965075.1_ASM96507v1	18_RiTSETSE	89.3044	12.1474	1062	1441	73.6988
31_SRR5259840_Earac4	21_GCA_000284055.1_ASM28405v1	89.2988	13.1805	1060	1395	75.9857
[truncated: 4,737 more rows]

## Sheet: Fig 3 and 4. PresenceAbsence
Gene cluster presence absence data used to construct the accumulation curves and gene cluster content comparison figures
	belli	belli	belli	Transitional	belli	belli	Transitional	Transitional	SFG	Typhus	Transitional	belli	canadensis	SFG	SFG	Transitional	SFG	belli	SFG	Typhus	SFG	SFG	Typhus	SFG	SFG	SFG	SFG	SFG	Helvetica	SFG	SFG	SFG	SFG	belli	Transitional	Typhus	Typhus	Typhus	Typhus	Typhus	Typhus	Typhus	Typhus	SFG	SFG	SFG	SFG	SFG	SFG
gene_cluster	Blapp1	Btrans1	Choog2	Cmasu2	Dallo3	Drufa1	Earac4	Econn1	GCA000007025	GCA000008045	GCA000012145	GCA000012385	GCA000014345	GCA000016625	GCA000017445	GCA000018205	GCA000018225	GCA000018245	GCA000021525	GCA000022785	GCA000023005	GCA000166935	GCA000195735	GCA000221205	GCA000237845	GCA000246715	GCA000247625	GCA000252365	GCA000255355	GCA000257435	GCA000261325	GCA000263055	GCA000263815	GCA000265225	GCA000273745	GCA000277165	GCA000277185	GCA000277205	GCA000277225	GCA000277245	GCA000277265	GCA000277285	GCA000277305	GCA000283595	GCA000283775	GCA000283795	GCA000283815	GCA000283835	GCA000283855
GC_00000001	1	1	1	1	1	1	1	1	1	1	1	1	1	1	1	1	1	1	1	1	1	1	1	1	1	1	1	1	1	1	1	1	1	1	1	1	1	1	1	1	1	1	1	1	1	1	1	1	1
GC_00000002	1	1	1	1	1	1	1	1	1	1	1	1	1	1	1	1	1	1	1	1	1	1	1	1	1	1	1	1	1	1	1	1	1	1	1	1	1	1	1	1	1	1	1	1	1	1	1	1	1
GC_00000003	1	1	1	1	0	1	1	1	1	0	1	1	0	1	1	1	1	1	1	0	1	1	0	1	1	1	1	1	1	1	1	1	1	1	1	0	0	0	0	0	0	0	0	1	1	1	1	1	1
GC_00000004	1	1	1	1	1	1	1	1	1	0	1	1	1	1	1	1	1	1	1	0	1	1	0	1	1	1	1	1	1	1	1	1	1	1	1	0	0	0	0	0	0	0	0	1	1	1	1	1	1
GC_00000005	1	1	1	1	1	1	1	1	1	0	1	1	1	1	1	1	1	1	1	1	1	1	1	1	1	1	1	1	1	1	1	1	1	1	1	1	1	1	1	1	1	0	0	1	0	1	1	1	1
GC_00000006	1	1	0	0	1	0	0	1	0	0	1	0	1	1	0	0	0	0	1	0	0	0	0	0	0	0	0	0	1	0	0	0	0	0	1	0	0	0	0	0	0	0	0	0	0	0	0	0	0
GC_00000007	0	1	1	1	0	1	1	0	1	0	1	1	1	1	1	1	1	1	1	0	1	1	0	1	1	1	1	1	1	1	1	1	1	0	0	0	0	0	0	0	0	0	0	1	1	1	1	1	1
GC_00000008	0	1	1	0	0	0	1	0	1	0	1	1	1	1	1	0	1	1	1	0	1	1	0	1	1	1	1	1	1	1	1	1	1	0	1	0	0	0	0	0	0	0	0	1	1	1	1	1	1
GC_00000009	1	1	1	1	1	1	1	1	1	0	1	1	1	1	1	1	1	1	1	0	1	1	0	1	1	1	1	1	1	1	1	1	1	1	1	0	0	0	0	0	0	0	0	1	1	1	1	1	1
GC_00000010	1	1	1	1	0	1	1	0	1	0	1	1	0	1	1	1	1	1	1	0	1	0	0	1	1	0	1	1	1	0	1	1	1	1	1	0	0	0	0	0	0	0	0	1	1	1	1	1	1
GC_00000011	1	1	1	0	0	1	1	1	1	0	1	1	0	1	1	1	1	1	1	0	1	1	0	1	1	1	1	1	1	1	1	1	1	0	1	0	0	0	0	0	0	0	0	1	1	1	1	1	1
GC_00000012	1	1	1	0	0	1	0	0	1	0	1	1	1	1	1	0	1	1	1	0	1	1	0	1	1	1	1	1	1	1	1	1	1	0	1	0	0	0	0	0	0	0	0	1	1	1	1	1	1
GC_00000013	1	1	1	0	0	1	1	1	1	0	1	1	1	1	1	0	1	1	1	0	1	1	0	1	1	1	1	1	0	1	1	1	1	0	1	0	0	0	0	0	0	0	0	1	1	1	1	1	1
GC_00000014	1	1	1	1	1	1	1	1	1	1	1	1	1	1	1	1	1	1	1	1	1	1	1	1	1	1	1	1	1	1	1	1	1	1	1	1	1	1	1	1	1	1	1	1	1	1	1	1	1
GC_00000015	1	1	1	1	0	1	1	1	1	0	1	1	1	1	1	0	1	1	1	0	1	1	0	1	1	1	1	1	1	1	1	1	1	1	0	0	0	0	0	0	0	0	0	1	1	1	1	1	1
GC_00000016	0	0	0	1	0	0	1	0	1	0	1	0	1	1	1	1	1	0	1	0	1	1	0	1	1	1	1	1	1	1	1	1	1	0	1	0	0	0	0	0	0	0	0	1	1	1	1	1	1
GC_00000017	1	1	0	1	1	0	1	1	0	0	1	1	0	0	0	0	0	1	0	1	0	0	1	0	0	0	0	0	0	0	0	0	0	0	0	1	1	1	1	1	1	0	0	0	0	0	0	0	0
GC_00000018	1	1	1	1	0	1	1	1	1	1	1	1	0	1	1	1	1	1	1	1	1	1	1	1	1	1	1	1	1	1	1	1	1	1	1	1	1	1	1	1	1	1	1	1	1	1	1	1	1
GC_00000019	1	1	1	1	0	1	1	0	1	1	1	0	0	1	1	1	0	1	1	1	1	1	1	1	1	1	1	1	1	1	1	1	1	0	1	1	1	1	1	1	1	1	1	1	1	1	1	1	1
GC_00000020	1	0	1	1	1	1	0	0	1	1	1	0	0	1	1	1	1	0	1	1	1	1	1	1	1	1	1	1	0	1	1	1	1	1	1	1	1	1	1	1	1	1	1	1	1	1	1	1	1
GC_00000021	1	1	1	1	0	1	1	1	1	0	1	1	0	1	1	1	1	1	1	0	1	1	0	1	1	1	1	1	0	1	1	1	1	1	1	0	0	0	0	0	0	0	0	1	1	1	1	1	1
GC_00000022	1	1	1	1	1	1	1	1	1	0	1	1	1	1	1	1	1	1	1	0	1	1	0	1	1	1	1	1	1	1	1	1	1	0	1	0	0	0	0	0	0	0	0	1	1	1	1	1	1
GC_00000023	1	1	1	0	1	1	1	1	1	1	1	1	1	1	1	1	1	1	1	1	1	1	1	1	1	1	1	1	1	1	1	1	1	1	1	1	1	1	1	1	1	1	1	1	1	1	1	1	1
GC_00000024	1	1	1	1	1	1	1	1	1	1	1	1	1	1	1	1	1	1	1	1	1	1	1	1	1	1	1	1	1	1	1	1	1	1	1	1	1	1	1	1	1	1	1	1	1	1	1	1	1
GC_00000025	1	1	1	1	1	1	1	1	1	1	1	1	1	1	1	1	1	1	1	1	1	1	1	1	1	1	1	1	1	1	1	1	1	1	1	1	1	1	1	1	1	1	1	1	1	1	1	1	1
GC_00000026	1	1	1	1	1	1	1	1	1	1	1	1	1	1	1	1	1	1	1	1	1	1	1	1	1	1	1	1	1	1	1	1	1	1	1	1	1	1	1	1	1	1	1	1	1	1	1	1	1
GC_00000027	1	0	1	1	1	1	1	1	1	1	1	1	1	1	1	1	1	1	1	1	1	1	1	1	1	1	1	1	1	1	1	1	1	1	1	1	1	1	1	1	1	1	1	1	1	1	1	1	1
GC_00000028	1	0	1	1	1	1	1	1	1	0	0	0	1	1	1	1	1	0	1	0	1	1	0	1	1	1	1	1	1	1	1	1	1	1	1	0	0	0	0	0	0	0	0	1	1	1	1	1	1
GC_00000029	0	0	0	1	0	0	1	0	1	0	1	0	0	1	1	1	1	0	1	0	1	1	0	1	1	1	1	1	1	1	1	1	1	0	1	0	0	0	0	0	0	0	0	1	1	1	1	1	1
GC_00000030	1	1	1	1	1	1	1	1	1	0	1	1	1	1	1	0	1	1	1	0	1	1	0	1	1	1	1	1	1	1	1	1	1	1	1	0	0	0	0	0	0	0	0	1	1	1	1	1	1
GC_00000031	0	1	0	0	0	0	1	1	1	0	1	1	1	1	1	1	1	1	1	0	1	1	0	1	1	1	1	1	1	1	1	1	1	0	1	0	0	0	0	0	0	0	0	1	1	1	1	1	1
GC_00000032	1	1	1	1	1	1	1	1	1	1	1	1	1	1	1	1	1	1	1	1	1	1	1	1	1	1	1	1	1	1	1	1	1	1	1	1	1	1	1	1	1	1	1	1	1	1	1	1	1
GC_00000033	1	1	1	1	1	1	0	0	1	0	0	1	0	1	1	0	1	1	1	0	1	1	0	1	1	1	1	1	1	1	1	1	1	1	1	0	0	0	0	0	0	0	0	1	1	1	1	1	1
GC_00000034	0	0	1	1	0	1	1	0	1	0	1	1	0	1	1	1	1	1	1	0	1	1	0	1	1	1	1	1	0	1	1	1	1	1	1	0	0	0	0	0	0	0	0	1	1	1	1	1	1
GC_00000035	0	1	1	1	0	1	1	0	1	0	1	1	1	1	1	0	1	1	1	0	1	1	0	1	1	1	1	1	1	1	0	1	0	0	1	0	0	0	0	0	0	0	0	1	1	1	1	1	1
GC_00000036	1	1	1	0	0	1	1	1	1	1	1	1	1	1	1	0	1	1	1	1	1	1	1	1	1	1	1	1	1	1	1	1	1	1	1	1	1	1	1	1	1	1	1	1	1	1	1	1	1
GC_00000037	1	1	1	1	1	1	1	1	1	0	1	1	0	1	1	1	1	1	1	0	1	1	0	1	1	1	1	1	1	1	1	1	1	1	1	0	0	0	0	0	0	0	0	1	1	1	1	1	1
GC_00000038	0	0	0	1	0	0	1	0	1	1	1	0	0	1	1	1	1	0	1	1	1	1	1	1	1	1	1	1	1	1	1	1	1	0	1	1	1	1	1	1	1	1	1	1	1	1	1	1	1
GC_00000039	1	1	1	1	0	1	1	1	1	0	1	1	1	1	1	1	1	1	1	0	1	1	0	1	1	1	1	1	1	1	1	1	1	0	1	0	0	0	0	0	0	0	0	1	1	1	1	1	1
GC_00000040	1	0	1	0	0	1	1	1	1	0	1	1	1	1	1	1	1	1	1	0	1	1	0	1	1	1	1	1	1	1	1	1	1	1	1	0	0	0	0	0	0	0	0	1	1	1	1	1	1
GC_00000041	0	0	0	1	0	0	1	0	1	0	1	0	0	1	1	0	1	0	1	0	1	1	0	1	1	1	1	1	1	1	1	1	1	0	0	0	0	0	0	0	0	0	0	1	1	1	1	1	1
GC_00000042	1	1	1	1	1	1	1	1	1	1	1	1	0	1	1	1	1	1	1	1	1	1	1	1	1	1	1	1	1	1	1	1	1	1	1	1	1	1	1	1	1	1	1	1	1	1	1	1	1
GC_00000043	0	0	0	1	0	0	0	0	1	0	1	0	1	1	1	1	1	0	1	0	1	1	0	1	1	1	1	1	1	1	1	1	1	0	1	0	0	0	0	0	0	0	0	1	1	1	1	1	1
GC_00000044	0	0	0	1	0	0	1	1	1	0	1	0	0	1	1	0	1	0	0	0	1	1	0	1	1	1	1	1	1	1	1	1	1	0	1	0	0	0	0	0	0	0	0	1	1	1	1	1	1
GC_00000045	0	0	0	1	0	0	1	0	1	0	1	0	0	1	1	1	1	0	1	0	1	1	0	1	1	1	1	1	1	1	1	1	1	0	1	0	0	0	0	0	0	0	0	1	1	1	1	1	1
GC_00000046	1	1	1	1	1	1	1	1	1	0	1	1	0	1	1	1	1	1	1	0	1	1	0	1	1	1	1	1	1	1	1	1	1	0	1	0	0	0	0	0	0	0	0	1	1	1	1	1	1
GC_00000047	0	0	0	1	0	0	0	0	1	0	1	0	0	1	1	1	1	0	1	0	1	1	0	1	1	1	1	1	0	1	1	1	1	0	1	0	0	0	0	0	0	0	0	1	1	1	1	1	1
GC_00000048	1	1	1	1	1	1	1	1	1	0	1	1	1	1	1	0	1	1	1	0	1	1	0	1	1	1	1	1	1	1	1	1	1	0	1	0	0	0	0	0	0	0	0	1	1	1	1	1	1
GC_00000049	1	1	1	1	0	1	1	1	1	1	1	1	1	1	1	1	1	1	1	1	1	1	1	1	1	1	1	1	1	1	1	1	1	1	1	1	1	1	1	1	1	1	1	1	1	1	1	1	1
GC_00000050	1	0	1	1	0	1	0	1	1	1	1	1	1	1	1	1	1	1	1	1	1	1	1	1	1	1	1	1	1	1	1	1	1	1	1	1	1	1	1	1	1	1	1	1	1	1	1	1	1
GC_00000051	0	0	1	1	1	1	1	1	1	0	1	1	0	1	1	1	1	1	1	0	1	1	0	1	1	1	1	1	1	1	1	1	1	1	1	0	0	0	0	0	0	0	0	1	1	1	1	1	1
GC_00000052	1	1	1	0	0	1	1	1	1	0	1	1	1	1	1	1	1	1	0	0	1	1	0	1	1	1	1	1	1	1	1	1	1	1	1	0	0	0	0	0	0	0	0	1	1	1	1	1	1
GC_00000053	1	1	1	1	1	1	1	1	1	0	1	1	1	1	1	1	1	1	1	0	1	1	0	1	1	1	1	1	1	1	1	1	1	1	1	0	0	0	0	0	0	0	0	1	1	1	1	1	1
GC_00000054	1	1	0	0	0	0	0	0	0	0	0	0	0	0	0	0	0	0	0	0	0	0	0	0	0	0	0	0	0	0	0	0	0	0	0	0	0	0	0	0	0	0	0	0	0	0	0	0	0
GC_00000055	1	1	1	1	1	1	1	1	1	1	1	1	1	1	1	1	1	1	1	1	1	1	1	1	1	1	1	1	1	1	1	1	1	1	1	1	1	1	1	1	1	1	1	1	1	1	1	1	1
GC_00000056	1	1	1	1	0	1	1	0	1	0	1	1	0	1	1	1	1	1	1	0	1	1	0	1	1	1	1	1	1	1	1	1	1	1	1	0	0	0	0	0	0	0	0	1	1	1	1	1	1
GC_00000057	0	0	0	0	1	0	1	0	1	0	1	0	1	1	1	0	1	0	1	0	1	0	0	1	1	0	1	1	1	1	1	1	1	0	1	0	0	0	0	0	0	0	0	1	1	1	1	1	1
GC_00000058	1	0	0	0	0	0	1	1	1	1	1	1	1	1	1	1	1	0	1	1	1	1	1	1	1	1	1	1	0	1	1	1	1	0	1	1	1	1	1	1	1	1	1	1	1	1	1	1	0
GC_00000059	0	0	0	0	0	0	0	0	0	0	0	0	0	0	0	1	0	0	0	0	0	0	0	0	0	0	0	0	0	0	0	0	0	0	0	0	0	0	0	0	0	0	0	0	0	0	0	0	0
GC_00000060	1	1	1	1	1	1	1	0	1	1	1	1	0	1	1	1	1	1	1	1	1	1	1	1	1	1	1	1	1	1	1	1	1	0	1	1	1	1	1	1	1	1	1	1	1	1	1	1	1
GC_00000061	1	1	1	1	1	1	1	1	1	1	1	1	1	1	1	1	1	1	1	1	1	1	1	1	1	1	1	1	1	1	1	1	1	1	1	1	1	1	1	1	1	1	1	1	1	1	1	1	1
GC_00000062	0	1	1	1	0	1	1	1	1	0	1	1	1	1	1	1	1	1	1	0	1	1	0	1	1	1	1	1	1	1	1	1	0	1	1	0	0	0	0	0	0	0	0	1	1	1	1	1	1
GC_00000063	1	1	1	1	0	1	1	1	1	1	1	1	0	1	1	1	1	1	1	1	1	1	1	1	1	1	1	1	1	1	1	1	1	0	1	1	1	1	1	1	1	1	1	1	1	1	1	1	1
GC_00000064	0	0	1	1	0	1	0	0	1	1	1	1	0	1	1	1	1	1	0	1	1	1	1	1	1	1	1	1	1	1	1	1	1	1	1	1	1	1	1	1	1	1	1	1	1	1	1	1	0
GC_00000065	1	1	1	1	1	1	1	1	1	1	1	1	1	1	1	1	1	1	1	1	1	1	1	1	1	1	1	1	1	1	1	1	1	1	1	1	1	1	1	1	1	1	1	1	1	1	1	1	1
GC_00000066	1	1	1	1	0	1	1	1	1	1	1	1	0	1	1	1	1	1	1	1	1	1	1	1	1	1	1	1	1	1	1	1	1	0	1	1	1	1	1	1	1	1	1	1	1	1	1	1	1
GC_00000067	1	1	1	1	0	1	1	0	1	1	1	1	0	1	1	1	0	1	1	1	1	1	1	1	1	1	1	1	0	0	1	1	1	1	1	1	1	1	1	1	1	1	1	1	1	1	1	1	1
GC_00000068	1	1	1	1	1	1	1	0	1	1	1	1	1	1	1	1	1	1	1	1	1	1	1	1	1	1	1	1	1	1	1	1	1	1	1	1	1	1	1	1	1	1	1	1	1	1	1	1	1
GC_00000069	1	1	1	1	1	1	1	1	1	1	1	1	1	1	1	1	1	1	1	0	1	1	0	1	1	1	1	1	1	1	1	1	1	1	1	0	0	0	0	0	0	1	1	1	1	1	1	1	1
GC_00000070	1	1	1	1	1	1	1	1	1	1	1	1	1	1	1	1	1	1	1	1	1	1	1	1	1	1	1	1	1	1	1	1	1	1	1	1	1	1	1	1	1	1	1	1	1	1	1	1	1
GC_00000071	0	0	0	1	0	0	1	0	1	0	1	0	0	1	1	1	1	0	1	0	1	1	0	1	1	1	1	1	1	1	1	1	1	0	1	0	0	0	0	0	0	0	0	1	1	1	1	1	1
GC_00000072	0	0	0	1	0	0	1	1	1	0	1	0	0	1	1	1	1	0	1	0	1	1	0	1	1	1	1	1	1	1	1	1	1	0	1	0	0	0	0	0	0	0	0	1	1	1	1	1	1
GC_00000073	0	0	0	0	0	0	0	0	1	0	0	0	0	1	1	1	1	0	1	0	1	1	0	1	1	1	1	1	1	1	1	1	1	0	1	0	0	0	0	0	0	0	0	1	1	1	1	1	1
GC_00000074	1	0	1	1	1	1	1	0	1	1	1	1	0	1	1	1	1	1	1	1	1	1	1	1	1	1	1	1	1	1	1	1	1	1	1	1	1	1	1	1	1	1	1	1	1	1	1	1	1
GC_00000075	0	0	0	1	0	0	1	1	1	0	1	0	0	1	1	0	1	0	1	0	1	1	0	1	1	1	1	1	1	1	1	1	1	0	0	0	0	0	0	0	0	0	0	1	1	1	1	1	1
GC_00000076	1	0	1	1	0	1	1	1	1	1	1	1	1	1	1	1	1	1	1	1	1	1	1	1	1	1	1	1	1	1	1	1	1	1	1	1	1	1	1	1	1	1	1	1	1	1	1	1	1
GC_00000077	0	1	1	1	1	1	1	1	1	0	1	1	0	1	1	1	1	1	1	0	0	1	0	1	1	1	1	1	1	1	1	1	1	0	1	0	0	0	0	0	0	0	0	1	1	1	1	1	1
GC_00000078	1	1	1	1	0	1	1	1	1	1	1	1	1	1	1	1	1	1	1	1	1	1	1	1	1	1	1	1	1	1	1	1	1	1	1	1	1	1	1	1	1	1	1	1	1	1	1	1	1
GC_00000079	1	1	1	0	1	1	1	1	1	0	1	1	1	1	1	1	1	1	1	0	1	1	0	1	1	1	1	1	1	1	1	1	1	0	1	0	0	0	0	0	0	0	0	1	1	1	1	1	1
GC_00000080	0	0	0	0	0	0	0	1	1	0	0	0	0	1	1	0	1	0	1	0	1	1	0	1	1	1	1	1	0	1	1	1	1	0	0	0	0	0	0	0	0	0	0	1	1	1	1	1	1
GC_00000081	1	1	1	1	0	1	1	0	1	1	1	1	1	1	0	1	0	1	1	1	1	1	1	1	1	1	1	1	1	1	1	1	1	0	1	1	1	1	1	1	1	1	1	1	1	0	0	0	1
GC_00000082	1	1	1	1	1	1	1	1	1	0	1	1	0	1	1	1	1	1	1	0	1	1	0	1	1	1	1	1	1	1	1	1	1	1	1	0	0	0	0	0	0	0	0	1	1	1	1	1	1
GC_00000083	1	1	1	1	1	1	1	1	1	1	1	1	0	1	1	1	1	1	1	1	1	1	1	1	1	1	1	1	1	1	1	1	1	1	1	1	1	1	1	1	1	1	1	1	1	1	1	1	1
GC_00000084	1	1	1	1	1	1	1	1	1	0	1	1	1	1	1	1	1	1	1	0	1	1	0	1	1	1	1	1	1	1	1	1	1	1	1	0	0	0	0	0	0	0	0	1	1	1	1	1	1
GC_00000085	1	1	1	1	1	1	1	1	1	1	1	1	1	1	1	1	1	1	1	1	1	1	1	1	1	1	1	1	1	1	1	1	1	1	1	1	1	1	1	1	1	1	1	1	1	1	1	1	1
GC_00000086	0	0	0	1	0	0	1	0	1	0	1	0	0	1	1	1	1	0	1	0	1	1	0	1	1	1	1	1	0	1	1	1	1	0	1	0	0	0	0	0	0	0	0	1	1	1	1	1	1
GC_00000087	1	1	1	1	1	1	1	1	1	0	1	1	0	1	1	1	1	1	1	0	1	1	0	1	1	1	1	1	1	1	1	1	1	1	1	0	0	0	0	0	0	0	0	1	1	1	1	1	1
GC_00000088	0	0	0	1	0	0	1	1	0	0	1	0	0	1	1	1	1	0	1	0	0	1	0	1	1	1	1	1	1	0	1	1	1	0	1	0	0	0	0	0	0	0	0	1	1	1	1	1	1
GC_00000089	1	1	1	1	1	1	1	1	1	1	1	1	0	1	1	1	1	1	1	1	1	1	1	1	0	1	1	0	1	1	1	0	0	1	1	1	1	1	1	1	1	1	1	1	1	1	1	1	1
GC_00000090	0	0	0	1	0	0	1	1	1	0	1	0	1	0	1	1	1	0	1	0	1	1	0	1	1	1	1	1	1	1	1	1	0	0	1	0	0	0	0	0	0	0	0	1	1	1	1	1	0
GC_00000091	0	1	1	0	0	1	1	0	1	0	1	1	0	1	1	0	1	1	1	0	1	1	0	1	1	1	1	1	0	1	1	1	1	0	1	0	0	0	0	0	0	0	0	1	1	1	1	1	0
GC_00000092	0	1	0	1	0	0	1	1	0	0	0	1	1	1	0	0	0	1	1	0	0	0	0	0	0	0	0	0	1	0	0	0	0	0	0	0	0	0	0	0	0	0	0	0	0	0	0	0	0
GC_00000093	1	1	1	1	1	1	0	1	1	1	1	1	1	1	1	1	1	1	1	1	1	1	1	1	1	1	1	1	1	1	1	1	1	1	1	1	1	1	1	1	1	1	1	1	1	1	1	1	1
GC_00000094	0	0	0	1	0	0	0	0	0	0	1	0	1	1	1	0	1	0	1	0	1	1	0	1	1	1	1	1	1	1	1	1	1	0	0	0	0	0	0	0	0	0	0	1	1	1	1	1	1
GC_00000095	1	1	1	0	0	1	1	1	1	0	1	1	1	1	1	1	1	1	1	0	1	1	0	1	1	1	1	1	1	1	1	1	1	1	1	0	0	0	0	0	0	0	0	1	1	1	1	1	1
GC_00000096	0	0	0	1	0	0	1	1	1	0	1	0	1	1	1	1	1	0	1	0	1	1	0	1	1	1	1	1	1	1	1	1	1	0	0	0	0	0	0	0	0	0	0	1	1	1	1	1	1
GC_00000097	1	1	1	0	0	1	1	1	1	0	1	1	0	1	1	1	1	1	1	0	1	1	0	1	1	1	1	1	1	1	1	1	1	1	1	0	0	0	0	0	0	0	0	1	1	1	1	1	0
GC_00000098	1	1	1	1	1	1	1	1	1	1	1	1	1	1	1	1	1	1	1	1	1	1	1	1	1	1	1	1	1	1	1	1	1	1	1	1	1	1	1	1	1	1	1	1	1	1	1	1	1
GC_00000099	1	1	1	1	0	1	1	1	1	0	1	1	1	1	1	1	1	1	1	0	1	1	0	1	1	1	1	1	1	1	1	1	1	0	1	0	0	0	0	0	0	0	0	1	1	1	1	1	1
GC_00000100	0	1	1	1	1	1	1	1	1	1	1	1	1	1	1	1	1	1	1	1	1	1	1	1	1	1	1	1	1	1	1	1	1	1	1	1	1	1	1	1	1	1	1	1	1	1	1	1	1
GC_00000101	1	1	1	0	1	1	1	1	1	0	1	1	1	1	1	1	0	1	1	0	1	1	0	1	1	1	1	1	1	1	1	1	1	1	1	0	0	0	0	0	0	0	0	1	1	1	1	1	1
GC_00000102	1	1	1	1	0	1	1	1	1	0	1	1	0	1	1	1	1	1	1	0	1	1	0	1	1	1	1	1	1	1	1	1	1	0	1	0	0	0	0	0	0	0	0	1	1	1	1	1	1
GC_00000103	0	1	1	1	0	1	1	0	1	0	1	1	0	1	1	1	1	1	1	0	1	1	1	1	1	1	1	1	1	1	1	1	1	1	1	0	1	0	0	0	0	0	0	1	1	1	1	1	1
GC_00000104	1	1	1	1	0	1	0	0	1	0	0	1	1	1	1	0	1	0	1	0	0	1	0	1	1	1	1	1	1	1	1	1	1	0	0	0	0	0	0	0	0	0	0	1	1	1	1	1	1
GC_00000105	0	1	0	0	1	0	0	1	1	0	1	1	0	1	1	0	1	1	1	0	1	1	0	1	1	1	1	1	1	1	1	1	1	0	1	0	0	0	0	0	0	0	0	1	1	1	1	1	1
GC_00000106	0	1	0	1	0	0	1	1	0	0	1	1	1	1	0	0	0	1	1	0	1	0	0	0	0	0	0	0	1	0	0	0	0	0	0	0	0	0	0	0	0	0	0	0	0	0	0	0	0
GC_00000107	1	1	1	1	1	1	0	1	1	1	1	1	1	1	1	1	1	1	1	1	1	1	1	1	1	1	1	1	1	1	1	1	1	1	1	1	1	1	1	1	1	1	1	1	1	1	1	1	1
GC_00000108	0	0	0	0	0	0	1	0	1	0	1	0	1	1	1	1	1	0	1	0	1	1	0	1	1	1	1	1	1	1	1	1	1	0	1	0	0	0	0	0	0	0	0	1	1	1	1	1	1
GC_00000109	1	1	1	1	0	1	1	1	1	1	1	1	1	1	1	1	1	1	0	1	1	1	1	1	1	1	1	1	1	1	1	1	1	1	1	1	1	1	1	1	1	1	1	1	1	1	1	1	1
GC_00000110	1	1	1	1	1	1	1	1	1	1	1	1	1	1	1	1	1	1	1	1	1	1	1	1	1	1	1	1	1	1	1	1	1	1	1	1	1	1	1	1	1	1	1	1	1	1	1	1	1
GC_00000111	1	1	1	1	1	1	1	1	1	1	1	1	1	1	1	1	1	1	1	1	1	1	1	1	1	1	1	1	1	1	1	1	1	1	1	1	1	1	1	1	1	1	1	1	1	1	1	1	1
GC_00000112	1	1	1	1	0	1	1	1	1	0	1	0	0	1	1	0	1	0	1	0	1	1	0	1	1	1	1	1	1	1	1	1	1	1	1	0	0	0	0	0	0	0	0	1	1	1	1	1	1
GC_00000113	1	1	1	1	1	1	1	1	1	1	1	1	1	1	1	1	1	1	1	1	1	1	1	1	1	1	1	1	1	1	1	1	1	1	1	1	1	1	1	1	1	1	1	1	1	1	1	1	1
GC_00000114	0	0	0	1	0	0	1	0	1	0	1	0	0	1	1	1	1	0	0	0	1	1	0	1	1	1	1	1	1	1	1	1	1	0	1	0	0	0	0	0	0	0	0	1	1	1	1	1	0
GC_00000115	1	1	1	1	0	1	1	0	1	0	1	1	0	1	1	1	1	1	1	0	1	1	0	1	1	1	1	1	1	1	1	1	1	1	1	0	0	0	0	0	0	0	0	1	1	1	1	1	1
GC_00000116	0	0	0	0	0	0	1	1	1	0	0	0	1	1	1	0	1	0	1	0	1	1	0	1	1	1	1	1	1	1	1	1	1	0	1	0	0	0	0	0	0	0	0	1	1	1	1	1	1
GC_00000117	1	1	1	1	1	1	1	0	1	1	1	1	1	1	1	1	1	1	1	1	1	1	1	1	1	1	1	1	1	1	1	1	1	1	1	1	1	1	1	1	1	1	1	1	1	1	1	1	1
GC_00000118	1	1	1	1	1	1	1	1	1	1	1	1	1	1	1	1	1	1	1	1	1	1	1	1	1	1	1	1	1	1	1	1	1	1	1	1	1	1	1	1	1	1	1	1	1	1	1	1	1
GC_00000119	1	1	1	1	1	1	1	1	1	1	1	1	1	1	1	1	1	1	1	1	1	1	1	1	1	1	1	1	1	1	1	1	1	1	1	1	1	1	1	1	1	1	1	1	1	1	1	1	1
GC_00000120	1	1	1	1	0	1	1	1	1	0	1	1	0	1	1	1	1	1	1	0	1	1	0	1	1	1	1	1	1	1	1	1	1	1	1	0	0	0	0	0	0	0	0	1	1	1	1	1	1
GC_00000121	0	0	0	1	0	0	1	1	1	0	1	0	1	1	1	1	1	0	1	0	1	1	0	1	1	1	1	1	1	1	1	1	1	0	1	0	0	0	0	0	0	0	0	1	1	1	1	1	1
GC_00000122	0	0	0	1	0	0	1	1	1	0	1	0	1	1	1	1	1	0	1	0	1	1	0	1	1	1	1	1	1	1	1	1	1	0	1	0	0	0	0	0	0	0	0	1	1	1	1	1	1
GC_00000123	1	1	1	1	1	1	1	1	1	1	1	1	1	1	1	1	1	1	1	1	1	1	1	1	1	1	1	1	1	1	1	1	1	1	1	1	1	1	1	1	1	1	1	1	1	1	1	1	1
GC_00000124	1	1	1	1	1	1	1	1	1	0	1	1	0	1	1	1	1	1	1	0	1	1	0	1	1	1	0	1	1	1	1	1	1	1	1	0	0	0	0	0	0	0	0	1	1	1	1	1	1
GC_00000125	1	1	1	1	1	1	1	1	1	1	1	1	1	1	1	1	1	1	1	1	1	1	1	1	1	1	1	1	1	1	1	1	1	1	1	1	1	1	1	1	1	1	1	1	1	1	1	1	1
GC_00000126	1	1	1	1	1	1	1	1	1	1	1	1	1	1	1	1	1	1	1	1	1	1	1	1	1	1	1	1	1	1	1	1	1	1	1	1	1	1	1	1	1	1	1	1	1	1	1	1	1
GC_00000127	1	1	1	1	1	1	1	1	1	1	1	1	1	1	1	1	1	1	1	1	1	1	1	1	1	1	1	1	1	1	1	1	1	1	1	1	1	1	1	1	1	1	1	1	1	1	1	1	1
GC_00000128	0	1	1	1	1	1	1	1	1	1	1	1	1	1	1	1	1	1	1	1	1	1	1	1	1	1	1	1	1	1	1	1	1	1	1	1	1	1	1	1	1	1	1	1	1	1	1	1	1
GC_00000129	1	1	1	1	1	1	1	1	1	0	1	1	1	1	1	1	1	1	1	1	1	1	1	1	1	1	1	1	1	1	1	1	1	1	1	1	1	1	1	1	1	0	0	1	1	1	1	1	1
GC_00000130	1	1	1	1	1	1	1	1	1	1	1	1	1	1	1	1	1	1	1	1	1	1	1	1	1	1	1	1	1	1	1	1	1	1	1	1	1	1	1	1	1	1	1	1	1	1	1	1	1
GC_00000131	1	1	1	0	0	1	1	1	1	0	1	1	0	1	1	1	1	1	0	0	1	1	0	1	1	1	1	1	1	1	1	1	1	0	1	0	0	0	0	0	0	0	0	1	1	1	1	1	1
GC_00000132	1	0	1	1	1	1	1	1	1	1	1	1	0	1	1	1	1	1	1	1	1	1	1	1	1	1	1	1	1	1	1	1	1	1	1	1	1	1	1	1	1	1	1	1	1	1	1	1	1
GC_00000133	1	1	1	1	1	1	1	1	1	1	1	1	1	1	1	1	1	1	1	1	1	1	1	1	1	1	1	1	1	1	1	1	1	1	1	1	1	1	1	1	1	1	1	1	1	1	1	1	1
GC_00000134	0	0	0	0	0	0	0	0	0	0	0	1	0	0	0	0	0	1	0	0	0	0	0	0	0	0	0	0	0	0	0	0	0	0	0	0	0	0	0	0	0	0	0	0	0	0	0	0	0
GC_00000135	1	1	1	1	1	1	1	1	1	1	1	1	1	1	1	1	1	1	1	1	1	1	1	1	1	1	1	1	1	1	1	1	1	1	1	1	1	1	1	1	1	1	1	1	1	1	1	1	1
GC_00000136	1	1	1	1	1	1	1	1	1	1	1	1	1	1	1	1	1	1	1	1	1	1	1	1	1	1	1	1	1	1	1	1	1	1	1	1	1	1	1	1	1	1	1	1	1	1	1	1	1
GC_00000137	1	1	1	1	1	1	1	1	1	1	1	1	1	1	1	1	1	1	1	1	1	1	1	1	1	1	1	1	1	1	1	1	1	1	1	1	1	1	1	1	1	1	1	1	1	1	1	1	1
GC_00000138	1	1	1	1	1	1	1	1	1	1	1	1	1	1	1	1	1	1	1	1	1	1	1	1	1	1	1	1	1	1	1	1	1	1	1	1	1	1	1	1	1	1	1	1	1	1	1	1	1
GC_00000139	1	1	1	1	1	1	1	1	1	1	1	1	1	1	1	1	1	1	1	1	1	1	1	1	1	1	1	1	1	1	1	1	1	1	1	1	1	1	1	1	1	1	1	1	1	1	1	1	1
GC_00000140	1	1	1	1	1	1	1	1	1	1	1	1	1	1	1	1	1	1	1	1	1	1	1	1	1	1	1	1	1	1	1	1	1	1	1	1	1	1	1	1	1	1	1	1	1	1	1	1	1
GC_00000141	1	1	1	1	0	1	1	1	1	1	1	1	1	1	0	1	0	1	1	1	1	1	1	1	1	1	1	1	1	1	1	1	1	1	1	1	1	1	1	1	1	1	1	1	0	0	0	0	1
GC_00000142	0	1	0	1	0	0	1	0	1	0	1	1	1	1	1	1	1	1	1	0	1	1	0	1	1	1	1	1	1	1	1	1	1	0	1	0	0	0	0	0	0	0	0	1	1	1	1	1	1
GC_00000143	1	1	1	1	1	1	1	0	1	1	1	1	1	1	1	1	1	1	1	1	1	1	1	1	1	1	1	1	1	1	1	1	1	0	1	1	1	1	1	1	1	1	1	1	1	1	1	1	1
GC_00000144	1	1	1	1	1	1	1	1	1	1	1	1	1	1	1	1	1	1	1	1	1	1	1	1	1	1	1	1	1	1	1	1	1	1	1	1	1	1	1	1	1	1	1	1	1	1	1	1	1
GC_00000145	1	1	1	1	1	1	0	1	1	1	1	1	1	1	1	1	1	1	1	1	1	1	1	1	1	1	1	1	1	1	1	1	1	1	1	1	1	1	1	1	1	1	1	1	1	1	1	1	1
GC_00000146	1	1	1	1	1	1	1	1	1	1	1	1	1	1	1	1	1	1	1	1	1	1	1	1	1	1	1	1	1	1	1	1	1	1	1	1	1	1	1	1	1	1	1	1	1	1	1	1	1
GC_00000147	1	1	1	1	1	1	1	1	1	1	1	1	1	1	1	1	1	1	1	1	1	1	1	1	1	1	1	1	1	1	1	1	1	1	1	1	1	1	1	1	1	1	1	1	1	1	1	1	1
GC_00000148	1	1	1	1	1	1	1	1	1	0	1	1	1	1	1	1	1	1	1	0	1	1	0	1	1	1	1	1	1	1	1	1	1	1	1	0	0	0	0	0	0	0	0	1	1	1	1	1	1
GC_00000149	1	1	1	1	1	1	1	1	1	1	1	1	1	1	1	1	1	1	1	1	1	1	1	1	1	1	1	1	1	1	1	1	1	1	1	1	1	1	1	1	1	1	1	1	1	1	1	1	1
GC_00000150	1	1	1	1	1	1	1	1	1	1	1	1	1	1	1	1	1	1	1	1	1	1	1	1	1	1	1	1	1	1	1	1	1	1	1	1	1	1	1	1	1	1	1	1	1	1	1	1	1
GC_00000151	1	1	1	1	1	1	1	1	1	1	1	1	1	1	1	1	1	1	1	1	1	1	1	1	1	1	1	1	1	1	1	1	1	1	1	1	1	1	1	1	1	1	1	1	1	1	1	1	1
GC_00000152	1	1	1	1	1	1	1	1	1	1	1	1	1	1	1	1	1	1	1	1	1	1	1	1	1	1	1	1	1	1	1	1	1	1	1	1	1	1	1	1	1	1	1	1	1	1	1	1	1
GC_00000153	1	1	1	1	1	1	1	1	1	1	1	1	1	1	1	1	1	1	1	1	1	1	1	1	1	1	1	1	1	1	1	1	1	1	1	1	1	1	1	1	1	1	1	1	1	1	1	1	1
GC_00000154	1	1	1	1	1	1	1	1	1	1	1	1	1	1	1	1	1	1	1	1	1	1	1	1	1	1	1	1	1	1	1	1	1	1	1	1	1	1	1	1	1	1	1	1	1	1	1	1	1
GC_00000155	1	1	1	0	1	1	1	0	1	1	1	1	0	1	1	1	1	1	1	1	1	1	1	1	1	1	1	1	1	1	1	1	1	1	1	1	1	1	1	1	1	1	1	1	1	1	1	1	1
GC_00000156	1	1	1	1	1	1	1	1	1	1	1	1	1	1	1	1	1	1	1	1	1	1	1	1	1	1	1	1	1	1	1	1	1	1	1	1	1	1	1	1	1	1	1	1	1	1	1	1	1
GC_00000157	1	1	1	1	1	1	1	1	1	1	1	1	1	1	1	1	1	1	1	1	1	1	1	1	1	1	1	1	1	1	1	1	1	1	1	1	1	1	1	1	1	1	1	1	1	1	1	1	1
GC_00000158	1	1	1	1	1	1	1	1	1	1	1	1	1	1	1	1	1	1	1	1	1	1	1	1	1	1	1	1	1	1	1	1	1	1	1	1	1	1	1	1	1	1	1	1	1	1	1	1	1
GC_00000159	1	1	1	1	1	1	1	1	1	1	1	1	1	1	1	1	1	1	1	1	1	1	1	1	1	1	1	1	1	1	1	1	1	1	1	1	1	1	1	1	1	1	1	1	1	1	1	1	1
GC_00000160	1	1	1	1	1	1	1	1	1	1	1	1	1	1	1	1	1	1	1	1	1	1	1	1	1	1	1	1	1	1	1	1	1	1	1	1	1	1	1	1	1	1	1	1	1	1	1	1	1
GC_00000161	1	0	1	1	1	1	1	1	1	1	1	1	1	1	1	1	1	1	1	1	1	1	1	1	1	1	1	1	1	1	1	1	1	1	1	1	1	1	1	1	1	1	1	1	1	1	1	1	1
GC_00000162	1	1	1	1	0	1	1	1	1	1	1	1	0	1	1	1	1	1	1	0	1	1	0	1	1	1	1	1	1	1	1	1	1	0	1	0	0	0	0	0	0	1	1	1	1	1	1	1	1
GC_00000163	1	1	1	1	1	1	1	1	1	1	1	1	1	1	1	1	1	1	1	1	1	1	1	1	1	1	1	1	1	1	1	1	1	1	1	1	1	1	1	1	1	1	1	1	1	1	1	1	1
GC_00000164	1	1	1	1	1	1	1	1	1	1	1	1	1	1	1	1	1	1	1	1	1	1	1	1	1	1	1	1	1	1	1	1	1	1	1	1	1	1	1	1	1	1	1	1	1	1	1	1	1
GC_00000165	0	0	0	1	0	0	1	0	1	0	1	0	0	1	1	0	1	0	1	0	1	1	0	1	1	1	1	1	1	1	1	1	1	0	0	0	0	0	0	0	0	0	0	1	1	1	1	1	1
GC_00000166	1	1	1	1	0	1	1	1	1	1	1	1	1	1	1	1	1	1	1	1	1	1	1	1	1	1	1	1	1	1	1	1	1	1	1	1	1	1	1	1	1	1	1	1	1	1	1	1	1
GC_00000167	1	1	1	1	1	1	1	1	1	1	1	1	1	1	1	1	1	1	1	1	1	1	1	1	1	1	1	1	1	1	1	1	1	1	1	1	1	1	1	1	1	1	1	1	1	1	1	1	1
GC_00000168	1	1	1	1	1	1	1	1	1	1	1	1	1	1	1	1	1	1	1	1	1	1	1	1	1	1	1	1	1	1	1	1	1	1	1	1	1	1	1	1	1	1	1	1	1	1	1	1	1
GC_00000169	1	1	1	0	0	1	1	1	1	1	1	1	1	1	1	1	1	1	1	1	1	1	1	1	1	1	1	1	1	1	1	1	1	0	1	1	1	1	1	1	1	1	1	1	1	1	1	1	1
GC_00000170	1	1	1	1	1	1	1	1	1	1	1	1	1	1	1	1	1	1	1	1	1	1	1	1	1	1	1	1	1	1	1	1	1	1	1	1	1	1	1	1	1	1	1	1	1	1	1	1	1
GC_00000171	1	1	1	1	1	1	1	1	1	1	1	1	1	1	1	1	1	1	1	1	1	1	1	1	1	1	1	1	1	1	1	1	1	1	1	1	1	1	1	1	1	1	1	1	1	1	1	1	1
GC_00000172	1	1	1	1	1	1	1	1	1	1	1	1	1	1	1	1	1	1	1	1	1	1	1	1	1	1	1	1	1	1	1	1	1	1	1	1	1	1	1	1	1	1	1	1	1	1	1	1	1
GC_00000173	1	1	1	1	1	1	1	1	1	1	1	1	1	1	1	1	1	1	1	1	1	1	1	1	1	1	1	1	1	1	1	1	1	1	1	1	1	1	1	1	1	1	1	1	1	1	1	1	1
GC_00000174	1	1	1	0	0	1	1	1	1	1	1	1	0	1	1	1	1	1	1	1	1	1	1	0	1	1	1	1	1	1	1	1	1	0	0	1	1	1	1	1	1	1	1	1	1	1	1	1	1
GC_00000175	1	1	1	1	0	1	1	1	1	1	1	1	1	1	1	1	1	1	1	1	1	1	1	1	1	1	1	1	1	1	1	1	1	1	1	1	1	1	1	1	1	1	1	1	1	1	1	1	1
GC_00000176	1	1	1	1	1	1	1	1	1	1	1	1	1	1	1	1	1	1	1	1	1	1	1	1	1	1	1	1	1	1	1	1	1	1	1	1	1	1	1	1	1	1	1	1	1	1	1	1	1
GC_00000177	1	1	1	1	1	1	1	1	1	1	1	1	1	1	1	1	1	1	1	1	1	1	1	1	1	1	1	1	1	1	1	1	1	1	1	1	1	1	1	1	1	1	1	1	1	1	1	1	1
GC_00000178	1	1	1	1	1	1	1	1	1	1	1	1	1	1	1	1	1	1	1	1	1	1	1	1	1	1	1	1	1	1	1	1	1	1	1	1	1	1	1	1	1	1	1	1	1	1	1	1	1
GC_00000179	1	1	1	1	1	1	1	1	1	1	1	1	1	1	1	1	1	1	1	1	1	1	1	1	1	1	1	1	1	1	1	1	1	1	1	1	1	1	1	1	1	1	1	1	1	1	1	1	1
GC_00000180	1	1	1	1	1	1	1	1	1	1	1	1	1	1	1	1	1	1	1	1	1	1	1	1	1	1	1	1	1	1	1	1	1	1	1	1	1	1	1	1	1	1	1	1	1	1	1	1	1
GC_00000181	1	1	1	1	1	1	1	1	1	1	1	1	1	1	1	1	1	1	1	1	1	1	1	1	1	1	1	1	1	1	1	1	1	1	1	1	1	1	1	1	1	1	1	1	1	1	1	1	1
GC_00000182	1	1	1	1	1	1	1	1	1	1	1	1	1	1	1	1	1	1	1	1	1	1	1	1	1	1	1	1	1	1	1	1	1	1	1	1	1	1	1	1	1	1	1	1	1	1	1	1	1
GC_00000183	1	1	1	1	1	1	1	1	1	1	1	1	1	1	1	1	1	1	1	1	1	1	1	1	1	1	1	1	1	1	1	1	1	1	1	1	1	1	1	1	1	1	1	1	1	1	1	1	1
GC_00000184	1	1	1	1	1	1	1	1	1	1	1	1	1	1	1	1	1	1	1	1	1	1	1	1	1	1	1	1	1	1	1	1	1	1	1	1	1	1	1	1	1	1	1	1	1	1	1	1	1
GC_00000185	1	1	1	1	1	1	1	1	1	1	1	1	1	1	1	1	1	1	1	1	1	1	1	1	1	1	1	1	1	1	1	1	1	1	1	1	1	1	1	1	1	1	1	1	1	1	1	1	1
GC_00000186	1	1	1	1	1	1	1	1	1	1	1	1	1	1	1	1	1	1	1	1	1	1	1	1	1	1	1	1	1	1	1	1	1	1	1	1	1	1	1	1	1	1	1	1	1	1	1	1	1
GC_00000187	1	1	1	1	1	1	1	1	1	1	1	1	1	1	1	1	1	1	1	1	1	1	1	1	1	1	1	1	1	1	1	1	1	1	1	1	1	1	1	1	1	1	1	1	1	1	1	1	1
GC_00000188	1	0	1	1	0	1	1	1	1	1	1	1	1	1	1	1	1	1	1	1	1	1	1	1	1	1	1	1	1	1	1	1	1	0	1	1	1	1	1	1	1	1	1	1	1	1	1	1	1
GC_00000189	1	1	1	1	1	1	1	1	1	1	1	1	1	1	1	1	1	1	1	1	1	1	1	1	1	1	1	1	1	1	1	1	1	1	1	1	1	1	1	1	1	1	1	1	1	1	1	1	1
GC_00000190	1	1	1	1	1	1	1	1	1	1	1	1	1	1	1	1	1	1	1	1	1	1	1	1	1	1	1	1	1	1	1	1	1	1	1	1	1	1	1	1	1	1	1	1	1	1	1	1	1
GC_00000191	1	1	1	1	1	1	1	1	1	1	1	1	1	1	1	1	1	1	1	1	1	1	1	1	1	1	1	1	1	1	1	1	1	1	1	1	1	1	1	1	1	1	1	1	1	1	1	1	1
GC_00000192	1	1	1	1	1	1	1	1	1	1	1	1	1	1	1	1	1	1	1	1	1	1	1	1	1	1	1	1	1	1	1	1	1	1	1	1	1	1	1	1	1	1	1	1	1	1	1	1	1
GC_00000193	1	1	1	1	1	1	1	1	1	1	1	1	1	1	1	1	1	1	1	1	1	1	1	1	1	1	1	1	1	1	1	1	1	1	1	1	1	1	1	1	1	1	1	1	1	1	1	1	1
GC_00000194	1	1	1	1	1	1	1	1	1	1	1	1	1	1	1	1	1	1	1	1	1	1	1	1	1	1	1	1	1	1	1	1	1	1	1	1	1	1	1	1	1	1	1	1	1	1	1	1	1
GC_00000195	1	1	1	1	1	1	1	1	1	1	1	1	1	1	1	1	1	1	1	1	1	1	1	1	1	1	1	1	1	1	1	1	1	1	1	1	1	1	1	1	1	1	1	1	1	1	1	1	1
GC_00000196	1	1	1	1	1	1	1	1	1	1	1	1	1	1	1	1	1	1	1	1	1	1	1	1	1	1	1	1	1	1	1	1	1	1	1	1	1	1	1	1	1	1	1	1	1	1	1	1	1
GC_00000197	1	1	1	1	1	1	1	1	1	1	1	1	1	1	1	1	1	1	1	1	1	1	1	1	1	1	1	1	1	1	1	1	1	1	1	1	1	1	1	1	1	1	1	1	1	1	1	1	1
GC_00000198	1	1	1	1	1	1	1	1	1	1	1	1	1	1	1	1	1	1	1	1	1	1	1	1	1	1	1	1	1	1	1	1	1	1	1	1	1	1	1	1	1	1	1	1	1	1	1	1	1
GC_00000199	1	1	1	1	1	1	1	1	1	1	1	1	1	1	1	1	1	1	1	1	1	1	1	1	1	1	1	1	1	1	1	1	1	1	1	1	1	1	1	1	1	1	1	1	1	1	1	1	1
GC_00000200	1	1	1	1	1	1	1	1	1	1	1	1	1	1	1	1	1	1	1	1	1	1	1	1	1	1	1	1	1	1	1	1	1	1	1	1	1	1	1	1	1	1	1	1	1	1	1	1	1
GC_00000201	1	1	1	1	1	1	1	1	1	1	1	1	1	1	1	1	1	1	1	1	1	1	1	1	1	1	1	1	1	1	1	1	1	1	1	1	1	1	1	1	1	1	1	1	1	1	1	1	1
GC_00000202	1	0	1	1	1	1	1	1	1	1	1	1	1	1	1	1	1	1	1	1	1	1	1	1	1	1	1	1	1	1	1	1	1	1	1	1	1	1	1	1	1	1	1	1	1	1	1	1	1
GC_00000203	1	1	1	1	1	1	1	1	1	1	1	1	1	1	1	1	1	1	1	1	1	1	1	1	1	1	1	1	1	1	1	1	1	1	1	1	1	1	1	1	1	1	1	1	1	1	1	1	1
GC_00000204	1	1	1	1	1	1	1	1	1	1	1	1	1	1	1	1	1	1	1	1	1	1	1	1	1	1	1	1	1	1	1	1	1	1	1	1	1	1	1	1	1	1	1	1	1	1	1	1	1
GC_00000205	1	1	1	1	1	1	1	1	1	1	1	1	1	1	1	1	1	1	1	1	1	1	1	1	1	1	1	1	1	1	1	1	1	1	1	1	1	1	1	1	1	1	1	1	1	1	1	1	1
GC_00000206	1	1	1	0	1	1	1	1	1	1	1	1	1	1	1	1	1	1	1	1	1	1	1	1	1	1	1	1	1	1	1	1	1	1	1	1	1	1	1	1	1	1	1	1	1	1	1	1	1
GC_00000207	1	1	1	1	1	1	1	1	1	1	1	1	1	1	1	1	1	1	1	1	1	1	1	1	1	1	1	1	1	1	1	1	1	1	1	1	1	1	1	1	1	1	1	1	1	1	1	1	1
GC_00000208	1	1	1	1	1	1	1	1	1	1	1	1	1	1	1	1	1	1	1	1	1	1	1	1	1	1	1	1	1	1	1	1	1	1	1	1	1	1	1	1	1	1	1	1	1	1	1	1	1
GC_00000209	1	1	1	1	1	1	1	1	1	1	1	1	1	1	1	1	1	1	1	1	1	1	1	1	1	1	1	1	1	1	1	1	1	1	1	1	1	1	1	1	1	1	1	1	1	1	1	1	1
GC_00000210	1	1	1	1	1	1	1	1	1	1	1	1	1	1	1	1	1	1	1	1	1	1	1	1	1	1	1	1	1	1	1	1	1	1	1	1	1	1	1	1	1	1	1	1	1	1	1	1	1
GC_00000211	1	1	1	1	1	1	1	1	1	1	1	1	1	1	1	1	1	1	1	1	1	1	1	1	1	1	1	1	1	1	1	1	1	1	1	1	1	1	1	1	1	1	1	1	1	1	1	1	1
GC_00000212	1	1	1	1	1	1	1	1	1	1	1	1	1	1	1	1	1	1	1	1	1	1	1	1	1	1	1	1	1	1	1	1	1	1	1	1	1	1	1	1	1	1	1	1	1	1	1	1	1
GC_00000213	1	1	1	1	1	1	1	1	1	1	1	1	1	1	1	1	1	1	1	1	1	1	1	1	1	1	1	1	1	1	1	1	1	1	1	1	1	1	1	1	1	1	1	1	1	1	1	1	1
GC_00000214	1	1	1	1	1	1	1	1	1	1	1	1	1	1	1	1	1	1	1	1	1	1	1	1	1	1	1	1	1	1	1	1	1	1	1	1	1	1	1	1	1	1	1	1	1	1	1	1	1
GC_00000215	1	0	1	1	1	1	1	1	1	1	1	1	1	1	1	1	1	1	1	1	1	1	1	1	1	1	1	1	1	1	1	1	1	1	1	1	1	1	1	1	1	1	1	1	1	1	1	1	1
GC_00000216	1	1	1	1	1	1	1	1	1	1	1	1	1	1	1	1	1	1	1	1	1	1	1	1	1	1	1	1	1	1	1	1	1	1	1	1	1	1	1	1	1	1	1	1	1	1	1	1	1
GC_00000217	1	1	1	1	1	1	1	1	1	1	1	1	1	1	1	1	1	1	1	1	1	1	1	1	1	1	1	1	1	1	1	1	1	1	1	1	1	1	1	1	1	1	1	1	1	1	1	1	1
GC_00000218	1	1	1	1	1	1	1	1	1	1	1	1	1	1	1	1	1	1	1	1	1	1	1	1	1	1	1	1	1	1	1	1	1	1	1	1	1	1	1	1	1	1	1	1	1	1	1	1	1
GC_00000219	1	0	1	1	1	1	1	1	1	1	1	1	1	1	1	1	1	1	1	1	1	1	1	1	1	1	1	1	1	1	1	1	1	1	1	1	1	1	1	1	1	1	1	1	1	1	1	1	1
GC_00000220	1	1	1	1	1	1	1	1	1	1	1	1	1	1	1	1	1	1	1	1	1	1	1	1	1	1	1	1	1	1	1	1	1	1	1	1	1	1	1	1	1	1	1	1	1	1	1	1	1
GC_00000221	1	1	1	1	1	1	1	1	1	1	1	1	1	1	1	1	1	1	1	1	1	1	1	1	1	1	1	1	1	1	1	1	1	1	1	1	1	1	1	1	1	1	1	1	1	1	1	1	1
GC_00000222	1	1	1	1	1	1	1	1	1	1	1	1	1	1	1	1	1	1	1	1	1	1	1	1	1	1	1	1	1	1	1	1	1	1	1	1	1	1	1	1	1	1	1	1	1	1	1	1	1
GC_00000223	1	1	1	1	1	1	1	1	1	1	1	1	1	1	1	1	1	1	1	1	1	1	1	1	1	1	1	1	1	1	1	1	1	1	1	1	1	1	1	1	1	1	1	1	1	1	1	1	1
GC_00000224	1	1	1	1	0	1	1	1	1	1	1	1	1	1	1	1	1	1	1	1	1	1	1	1	1	1	1	1	1	1	1	1	1	1	1	1	1	1	1	1	1	1	1	1	1	1	1	1	1
GC_00000225	1	1	1	1	1	1	1	1	1	1	1	1	1	1	1	1	1	1	1	1	1	1	1	1	1	1	1	1	1	1	1	1	1	1	1	1	1	1	1	1	1	1	1	1	1	1	1	1	1
GC_00000226	1	1	1	1	1	1	1	1	1	1	1	1	1	1	1	1	1	1	1	1	1	1	1	1	1	1	1	1	1	1	1	1	1	1	1	1	1	1	1	1	1	1	1	1	1	1	1	1	1
GC_00000227	1	1	1	1	1	1	1	1	1	1	1	1	1	1	1	1	1	1	1	1	1	1	1	1	1	1	1	1	1	1	1	1	1	1	1	1	1	1	1	1	1	1	1	1	1	1	1	1	1
GC_00000228	1	1	1	1	1	1	1	1	1	1	1	1	1	1	1	1	1	1	1	1	1	1	1	1	1	1	1	1	1	1	1	1	1	1	1	1	1	1	1	1	1	1	1	1	1	1	1	1	1
GC_00000229	1	1	1	0	1	1	1	1	1	1	1	1	1	1	1	1	1	1	1	1	1	1	1	1	1	1	1	1	1	1	1	1	1	1	1	1	1	1	1	1	1	1	1	1	1	1	1	1	1
GC_00000230	1	1	1	1	1	1	1	1	1	1	1	1	1	1	1	1	1	1	1	1	1	1	1	1	1	1	1	1	1	1	1	1	1	1	1	1	1	1	1	1	1	1	1	1	1	1	1	1	1
GC_00000231	1	1	1	1	0	1	1	1	1	1	1	1	1	1	1	1	1	1	1	1	1	1	1	1	1	1	1	1	1	1	1	1	1	1	1	1	1	1	1	1	1	1	1	1	1	1	1	1	1
GC_00000232	1	1	1	1	1	1	1	1	1	1	1	1	1	1	1	1	1	1	1	1	1	1	1	1	1	1	1	1	1	1	1	1	1	1	1	1	1	1	1	1	1	1	1	1	1	1	1	1	1
GC_00000233	1	1	1	1	1	1	1	1	1	1	1	1	1	1	1	1	1	1	1	1	1	1	1	1	1	1	1	1	1	1	1	1	1	1	1	1	1	1	1	1	1	1	1	1	1	1	1	1	1
GC_00000234	1	1	1	1	1	1	1	1	1	1	1	1	1	1	1	1	1	1	1	1	1	1	1	1	1	1	1	1	0	1	1	1	1	1	1	1	1	1	1	1	1	1	1	1	1	1	1	1	1
GC_00000235	0	1	1	1	1	1	1	1	1	1	1	1	1	1	1	1	1	1	1	1	1	1	1	1	1	1	1	1	1	1	1	1	1	1	1	1	1	1	1	1	1	1	1	1	1	1	1	1	1
GC_00000236	1	1	1	0	1	1	1	1	1	1	1	1	1	1	1	1	1	1	1	1	1	1	1	1	1	1	1	1	1	1	1	1	1	1	1	1	1	1	1	1	1	1	1	1	1	1	1	1	1
GC_00000237	1	1	1	1	1	1	1	1	1	1	1	1	1	1	1	1	1	1	1	1	1	1	1	1	1	1	1	1	1	1	1	1	1	1	1	1	1	1	1	1	1	1	1	1	1	1	1	1	1
GC_00000238	1	1	1	1	1	1	1	1	1	1	1	1	1	1	1	1	1	1	1	1	1	1	1	1	1	1	1	1	1	1	1	1	1	1	1	1	1	1	1	1	1	1	1	1	1	1	1	1	1
GC_00000239	0	0	1	1	1	1	1	1	1	1	1	1	1	1	1	1	1	1	1	1	1	1	1	1	1	1	1	1	1	1	1	1	1	1	1	1	1	1	1	1	1	1	1	1	1	1	1	1	1
GC_00000240	1	1	1	1	1	1	1	1	1	1	1	1	1	1	1	1	1	1	1	1	1	1	1	1	1	1	1	1	1	1	1	1	1	1	1	1	1	1	1	1	1	1	1	1	1	1	1	1	1
GC_00000241	1	1	1	1	1	1	1	1	1	1	1	1	1	1	1	1	1	1	1	1	1	1	1	1	1	1	1	1	1	1	1	1	1	1	1	1	1	1	1	1	1	1	1	1	1	1	1	1	1
GC_00000242	1	1	1	0	1	1	1	1	1	1	1	1	1	1	1	1	1	1	1	1	1	1	1	1	1	1	1	1	1	1	1	1	1	1	1	1	1	1	1	1	1	1	1	1	1	1	1	1	1
GC_00000243	1	1	1	1	1	1	1	1	1	1	1	1	1	1	1	1	1	1	1	1	1	1	1	1	1	1	1	1	1	1	1	1	1	1	1	1	1	1	1	1	1	1	1	1	1	1	1	1	1
GC_00000244	1	1	1	1	1	1	1	1	1	1	1	1	1	1	1	1	1	1	1	1	1	1	1	1	1	1	1	1	1	1	1	1	1	1	1	1	1	1	1	1	1	1	1	1	1	1	1	1	1
GC_00000245	1	1	1	1	1	1	1	1	1	1	1	1	1	1	1	1	1	1	1	1	1	1	1	1	1	1	1	1	1	1	1	1	1	1	1	1	1	1	1	1	1	1	1	1	1	1	1	1	1
GC_00000246	1	1	1	1	1	1	1	1	1	1	1	1	1	1	1	1	1	1	1	1	1	1	1	1	1	1	1	1	1	1	1	1	1	1	1	1	1	1	1	1	1	1	1	1	1	1	1	1	1
GC_00000247	1	1	1	1	1	1	1	1	1	1	1	1	1	1	1	1	1	1	1	1	1	1	1	1	1	1	1	1	1	1	1	1	1	1	1	1	1	1	1	1	1	1	1	1	1	1	1	1	1
GC_00000248	1	1	1	1	1	1	1	1	1	1	1	1	1	1	1	1	1	1	1	1	1	1	1	1	1	1	1	1	1	1	1	1	1	1	1	1	1	1	1	1	1	1	1	1	1	1	1	1	1
GC_00000249	1	1	1	1	1	1	1	1	1	1	1	1	1	1	1	1	1	1	1	1	1	1	1	1	1	1	1	1	1	1	1	1	1	1	1	1	1	1	1	1	1	1	1	1	1	1	1	1	1
GC_00000250	1	1	1	1	1	1	1	1	1	1	1	1	1	1	1	1	1	1	1	1	1	1	1	1	1	1	1	1	1	1	1	1	1	1	1	1	1	1	1	1	1	1	1	1	1	1	1	1	1
GC_00000251	1	1	1	1	1	1	1	1	1	1	1	1	1	1	1	1	1	1	1	1	1	1	1	1	1	1	1	1	1	1	1	1	1	1	1	1	1	1	1	1	1	1	1	1	1	1	1	1	1
GC_00000252	1	1	1	1	1	1	1	0	1	1	1	1	1	1	1	1	1	1	1	1	1	1	1	1	1	1	1	1	1	1	1	1	1	1	1	1	1	1	1	1	1	1	1	1	1	1	1	1	1
GC_00000253	1	1	1	1	1	1	1	1	1	1	1	1	1	1	1	1	1	1	1	1	1	1	1	1	1	1	1	1	1	1	1	1	1	1	1	1	1	1	1	1	1	1	1	1	1	1	1	1	1
GC_00000254	0	1	1	0	0	1	1	0	1	0	1	0	0	1	1	0	1	0	0	0	1	1	0	1	1	1	1	1	0	1	1	1	1	1	0	0	0	0	0	0	0	0	0	1	1	1	1	1	1
GC_00000255	1	1	1	1	0	1	1	1	1	1	1	1	1	1	1	1	1	1	1	1	1	1	1	1	1	1	1	1	1	1	1	1	1	1	1	1	1	1	1	1	1	1	1	1	1	1	1	1	1
GC_00000256	1	1	1	1	1	1	1	1	1	1	1	1	1	1	1	1	1	1	1	1	1	1	1	1	1	1	1	1	1	1	1	1	1	1	1	1	1	1	1	1	1	1	1	1	1	1	1	1	1
GC_00000257	1	1	1	1	1	1	1	1	1	1	1	1	1	1	1	1	1	1	1	1	1	1	1	1	1	1	1	1	1	1	1	1	1	1	1	1	1	1	1	1	1	1	1	1	1	1	1	1	1
GC_00000258	1	1	1	1	1	1	1	1	1	1	1	1	1	1	1	1	1	1	1	1	1	1	1	1	1	1	1	1	1	1	1	1	1	1	1	1	1	1	1	1	1	1	1	1	1	1	1	1	1
GC_00000259	1	1	1	1	1	1	1	1	1	1	1	1	1	1	1	1	1	1	1	1	1	1	1	1	1	1	1	1	1	1	1	1	1	1	1	1	1	1	1	1	1	1	1	1	1	1	1	1	1
GC_00000260	1	1	1	1	1	1	1	1	1	1	1	1	1	1	1	1	1	1	1	1	1	1	1	1	1	1	1	1	1	1	1	1	1	1	1	1	1	1	1	1	1	1	1	1	1	1	1	1	1
GC_00000261	1	1	1	1	1	1	1	1	1	1	1	1	1	1	1	1	1	1	1	1	1	1	1	1	1	1	1	1	1	1	1	1	1	1	1	1	1	1	1	1	1	1	1	1	1	1	1	1	1
GC_00000262	1	1	1	1	1	1	1	1	1	1	1	1	1	1	1	1	1	1	1	1	1	1	1	1	1	1	1	1	1	1	1	1	1	1	1	1	1	1	1	1	1	1	1	1	1	1	1	1	1
GC_00000263	1	1	1	1	1	1	1	1	1	1	1	1	1	1	1	1	1	1	1	1	1	1	1	1	1	1	1	1	1	1	1	1	1	1	1	1	1	1	1	1	1	1	1	1	1	1	1	1	1
GC_00000264	1	1	1	1	1	1	1	1	1	1	1	1	1	1	1	1	1	1	1	1	1	1	1	1	1	1	1	1	1	1	1	1	1	1	1	1	1	1	1	1	1	1	1	1	1	1	1	1	1
GC_00000265	0	0	0	0	1	0	0	1	0	0	0	0	0	0	0	0	0	0	0	0	0	0	0	0	0	0	0	0	0	0	0	0	0	0	0	0	0	0	0	0	0	0	0	0	0	0	0	0	0
GC_00000266	1	1	1	1	1	1	1	1	1	1	1	1	1	1	1	1	1	1	1	1	1	1	1	1	1	1	1	1	1	1	1	1	1	1	1	1	1	1	1	1	1	1	1	1	1	1	1	1	1
GC_00000267	1	1	1	0	1	1	1	1	1	1	1	1	1	1	1	1	1	1	1	1	1	1	1	1	1	1	1	1	1	1	1	1	1	1	1	1	1	1	1	1	1	1	1	1	1	1	1	1	1
GC_00000268	1	1	1	1	1	1	1	1	1	1	1	1	1	1	1	1	1	1	1	1	1	1	1	1	1	1	1	1	1	1	1	1	1	1	1	1	1	1	1	1	1	1	1	1	1	1	1	1	1
GC_00000269	1	1	1	1	1	1	1	1	1	1	1	1	1	1	1	1	1	1	1	1	1	1	1	1	1	1	1	1	1	1	1	0	1	1	1	1	1	1	1	1	1	1	1	1	1	1	1	1	1
GC_00000270	1	1	1	1	1	1	1	1	1	1	1	1	1	1	1	1	1	1	1	1	1	1	1	1	1	1	1	1	1	1	1	1	1	1	1	1	1	1	1	1	1	1	1	1	1	1	1	1	1
GC_00000271	1	1	1	1	1	1	1	1	1	1	1	1	1	1	1	1	1	1	1	1	1	1	1	1	1	1	1	1	1	1	1	1	1	1	1	1	1	1	1	1	1	1	1	1	1	1	1	1	1
GC_00000272	1	1	1	1	1	1	1	1	1	1	1	1	1	1	1	1	1	1	1	1	1	1	1	1	1	1	1	1	1	1	1	1	1	1	1	1	1	1	1	1	1	1	1	1	1	1	1	1	1
GC_00000273	1	1	1	1	1	1	1	1	1	1	1	1	1	1	1	1	1	1	1	1	1	1	1	1	1	1	1	1	1	1	1	1	1	1	1	1	1	1	1	1	1	1	1	1	1	1	1	1	1
GC_00000274	1	1	1	1	1	1	1	1	1	1	1	1	1	1	1	1	1	1	1	1	1	1	1	1	1	1	1	1	1	1	1	1	1	1	1	1	1	1	1	1	1	1	1	1	1	1	1	1	1
GC_00000275	1	1	1	1	1	1	1	1	1	1	1	1	1	1	1	1	1	1	1	1	1	1	1	1	1	1	1	1	1	1	1	1	1	1	1	1	1	1	1	1	1	1	1	1	1	1	1	1	1
GC_00000276	1	1	1	1	1	1	1	1	1	1	1	1	1	1	1	1	1	1	1	1	1	1	1	1	1	1	1	1	1	1	1	1	1	1	1	1	1	1	1	1	1	1	1	1	1	1	1	1	1
GC_00000277	1	1	1	1	1	1	1	1	1	1	1	1	1	1	1	1	1	1	1	1	1	1	1	1	1	1	1	1	1	1	1	1	1	1	1	1	1	1	1	1	1	1	1	1	1	1	1	1	1
GC_00000278	1	1	1	1	1	1	1	1	1	1	1	1	1	1	1	1	1	1	1	1	1	1	1	1	1	1	1	1	1	1	1	1	1	1	1	1	1	1	1	1	1	1	1	1	1	1	1	1	1
GC_00000279	1	1	1	1	1	1	1	1	1	1	1	1	1	1	1	1	1	1	1	1	1	1	1	1	1	1	1	1	1	1	1	1	1	1	1	1	1	1	1	1	1	1	1	1	1	1	1	1	1
GC_00000280	1	1	1	1	1	1	1	1	1	1	1	1	1	1	1	1	1	1	1	1	1	1	1	1	1	1	1	1	1	1	1	1	1	1	1	1	1	1	1	1	1	1	1	1	1	1	1	1	1
GC_00000281	1	1	1	1	1	1	1	1	1	1	1	1	1	1	1	1	1	1	1	1	1	1	1	1	1	1	1	1	1	1	1	1	1	1	1	1	1	1	1	1	1	1	1	1	1	1	1	1	1
GC_00000282	1	1	1	1	1	1	1	1	1	1	1	1	1	1	1	1	1	1	1	1	1	1	1	1	1	1	1	1	1	1	1	1	1	1	1	1	1	1	1	1	1	1	1	1	1	1	1	1	1
GC_00000283	1	1	1	1	1	1	1	1	1	1	1	1	1	1	1	1	1	1	1	1	1	1	1	1	1	1	1	1	1	1	1	1	1	1	1	1	1	1	1	1	1	1	1	1	1	1	1	1	1
GC_00000284	1	1	1	1	1	1	1	1	1	1	1	1	1	1	1	1	1	1	1	1	1	1	1	1	1	1	1	1	1	1	1	1	1	1	1	1	1	1	1	1	1	1	1	1	1	1	1	1	1
GC_00000285	1	1	1	1	1	1	1	1	1	1	1	1	0	1	1	1	1	1	1	1	1	1	1	1	1	1	1	1	1	1	1	1	1	1	1	1	1	1	1	1	1	1	1	1	1	1	1	1	1
GC_00000286	1	1	1	1	1	1	1	1	1	1	1	1	1	1	1	1	1	1	1	1	1	1	1	1	1	1	1	1	1	1	1	1	1	1	1	1	1	1	1	1	1	1	1	1	1	1	1	1	1
GC_00000287	1	1	1	1	1	1	1	1	1	1	1	1	1	1	1	1	1	1	1	1	1	1	1	1	1	1	1	1	1	1	1	1	1	1	1	1	1	1	1	1	1	1	1	1	1	1	1	1	1
GC_00000288	1	1	1	1	1	1	1	1	1	1	1	1	1	1	1	1	1	1	1	1	1	1	1	1	1	1	1	1	1	1	1	1	1	1	1	1	1	1	1	1	1	1	1	1	1	1	1	1	1
GC_00000289	1	1	1	1	1	1	1	1	1	1	1	1	1	1	1	1	1	1	1	1	1	1	1	1	1	1	1	1	1	1	1	1	1	1	1	1	1	1	1	1	1	1	1	1	1	1	1	1	1
GC_00000290	1	1	1	1	1	1	1	1	1	1	1	1	1	1	1	1	1	1	1	1	1	1	1	1	1	1	1	1	1	1	1	1	1	1	1	1	1	1	1	1	1	1	1	1	1	1	1	1	1
GC_00000291	1	1	1	1	1	1	1	1	1	1	1	1	1	1	1	1	1	1	1	1	1	1	1	1	1	1	1	1	1	1	1	1	1	1	1	1	1	1	1	1	1	1	1	1	1	1	1	1	1
GC_00000292	1	1	1	1	1	1	1	1	1	1	1	1	1	1	1	1	1	1	1	1	1	1	1	1	1	1	1	1	1	1	1	1	1	1	1	1	1	1	1	1	1	1	1	1	1	1	1	1	1
GC_00000293	1	1	1	1	1	1	1	1	1	1	1	1	1	1	1	1	1	1	1	1	1	1	1	1	1	1	1	1	1	1	1	1	1	1	1	1	1	1	1	1	1	1	1	1	1	1	1	1	1
GC_00000294	1	1	1	1	1	1	1	1	1	1	1	1	1	1	1	1	1	1	1	1	1	1	1	1	1	1	1	1	1	1	1	1	1	1	1	1	1	1	1	1	1	1	1	1	1	1	1	1	1
GC_00000295	1	1	1	1	1	1	1	1	1	1	1	1	1	1	1	1	1	1	1	1	1	1	1	1	1	1	1	1	1	1	1	1	1	1	1	1	1	1	1	1	1	1	1	1	1	1	1	1	1
GC_00000296	1	1	1	1	1	1	1	1	1	1	1	1	1	1	1	1	1	1	1	1	1	1	1	1	1	1	1	1	1	1	1	1	1	1	1	1	1	1	1	1	1	1	1	1	1	1	1	1	1
GC_00000297	1	1	1	1	1	1	1	1	1	1	1	1	1	1	1	1	1	1	1	1	1	1	1	1	1	1	1	1	1	1	1	1	1	1	1	1	1	1	1	1	1	1	1	1	1	1	1	1	1
GC_00000298	1	1	1	1	1	1	1	1	1	1	1	1	1	1	1	1	1	1	1	1	1	1	1	1	1	1	1	1	1	1	1	1	1	1	1	1	1	1	1	1	1	1	1	1	1	1	1	1	1
GC_00000299	1	1	1	1	1	1	1	1	1	1	1	1	1	1	1	1	1	1	1	1	1	1	1	1	1	1	1	1	1	1	1	1	1	1	1	1	1	1	1	1	1	1	1	1	1	1	1	1	1
GC_00000300	1	1	1	1	1	1	1	1	1	1	1	1	1	1	1	1	1	1	1	1	1	1	1	1	1	1	1	1	1	1	1	1	1	1	1	1	1	1	1	1	1	1	1	1	1	1	1	1	1
GC_00000301	1	1	1	1	1	1	1	1	1	1	1	1	1	1	1	1	1	1	1	1	1	1	1	1	1	1	1	1	1	1	1	1	1	1	1	1	1	1	1	1	1	1	1	1	1	1	1	1	1
GC_00000302	1	1	1	1	1	1	1	1	1	1	1	1	1	1	1	1	1	1	1	1	1	1	1	1	1	1	1	1	1	1	1	1	1	1	1	1	1	1	1	1	1	1	1	1	1	1	1	1	1
GC_00000303	1	1	1	1	1	1	1	1	1	1	1	1	1	1	1	1	1	1	1	1	1	1	1	1	1	1	1	1	1	1	1	1	1	1	1	1	1	1	1	1	1	1	1	1	1	1	1	1	1
GC_00000304	1	1	1	1	1	1	1	1	1	1	1	1	1	1	1	1	1	1	1	1	1	1	1	1	1	1	1	1	1	1	1	1	1	1	1	1	1	1	1	1	1	1	1	1	1	1	1	1	1
GC_00000305	1	1	1	1	1	1	1	1	1	1	1	1	1	1	1	1	1	1	1	1	1	1	1	1	1	1	1	1	1	1	1	1	1	1	1	1	1	1	1	1	1	1	1	1	1	1	1	1	1
GC_00000306	1	1	1	1	1	1	1	1	1	1	1	1	1	1	1	1	1	1	1	1	1	1	1	1	1	1	1	1	1	1	1	1	1	1	1	1	1	1	1	1	1	1	1	1	1	1	1	1	1
GC_00000307	1	1	1	1	1	1	1	1	1	1	1	1	1	1	1	1	1	1	1	1	1	1	1	1	1	1	1	1	1	1	1	1	1	1	1	1	1	1	1	1	1	1	1	1	1	1	1	1	1
GC_00000308	1	1	1	1	1	1	1	1	1	1	1	1	1	1	1	1	1	1	1	1	1	1	1	1	1	1	1	1	1	1	1	1	1	1	1	1	1	1	1	1	1	1	1	1	1	1	1	1	1
GC_00000309	1	1	1	1	1	1	1	1	1	1	1	1	1	1	1	1	1	1	1	1	1	1	1	1	1	1	1	1	1	1	1	1	1	1	1	1	1	1	1	1	1	1	1	1	1	1	1	1	1
GC_00000310	1	1	1	1	1	1	1	1	1	1	1	1	1	1	1	1	1	1	1	1	1	1	1	1	1	1	1	1	1	1	1	1	1	1	1	1	1	1	1	1	1	1	1	1	1	1	1	1	1
GC_00000311	1	1	1	1	1	1	1	1	1	1	1	1	1	1	1	1	1	1	1	1	1	1	1	1	1	1	1	1	1	1	1	1	1	1	1	1	1	1	1	1	1	1	1	1	1	1	1	1	1
GC_00000312	1	1	1	1	1	1	1	1	1	1	1	1	1	1	1	1	1	1	1	1	1	1	1	1	1	1	1	1	1	1	1	1	1	1	1	1	1	1	1	1	1	1	1	1	1	1	1	1	1
GC_00000313	1	1	1	1	1	1	1	1	1	1	1	1	1	1	1	1	1	1	1	1	1	1	1	1	1	1	1	1	1	1	1	1	1	1	1	1	1	1	1	1	1	1	1	1	1	1	1	1	1
GC_00000314	1	1	1	1	1	1	1	1	1	1	1	1	1	1	1	1	1	1	1	1	1	1	1	1	1	1	1	1	1	1	1	1	1	1	1	1	1	1	1	1	1	1	1	1	1	1	1	1	1
GC_00000315	1	1	1	1	1	1	1	1	1	1	1	1	1	1	1	1	1	1	1	1	1	1	1	1	1	1	1	1	1	1	1	1	1	1	1	1	1	1	1	1	1	1	1	1	1	1	1	1	1
GC_00000316	1	1	1	1	1	1	1	1	1	1	1	1	1	1	1	1	1	1	1	1	1	1	1	1	1	1	1	1	1	1	1	1	1	1	1	1	1	1	1	1	1	1	1	1	1	1	1	1	1
GC_00000317	1	1	1	1	1	1	1	1	1	1	1	1	1	1	1	1	1	1	1	1	1	1	1	1	1	1	1	1	1	1	1	1	1	1	1	1	1	1	1	1	1	1	1	1	1	1	1	1	1
GC_00000318	1	1	1	1	1	1	1	1	1	1	1	1	1	1	1	1	1	1	1	1	1	1	1	1	1	1	1	1	1	1	1	1	1	1	1	1	1	1	1	1	1	1	1	1	1	1	1	1	1
GC_00000319	1	1	1	0	1	1	1	1	1	1	1	1	1	1	1	1	1	1	1	1	1	1	1	1	1	1	1	1	1	1	1	1	1	1	1	1	1	1	1	1	1	1	1	1	1	1	1	1	1
GC_00000320	1	1	1	1	1	1	1	1	1	1	1	1	1	1	1	1	1	1	1	1	1	1	1	1	1	1	1	1	1	1	1	1	1	1	1	1	1	1	1	1	1	1	1	1	1	1	1	1	1
GC_00000321	1	0	1	1	0	1	1	1	1	1	1	1	1	1	1	1	1	1	1	1	1	1	1	1	1	1	1	1	1	1	1	1	1	1	1	1	1	1	1	1	1	1	1	1	1	1	1	1	1
GC_00000322	1	1	1	1	1	1	1	1	1	1	1	1	1	1	1	1	1	1	1	1	1	1	1	1	1	1	1	1	1	1	1	1	1	1	1	1	1	1	1	1	1	1	1	1	1	1	1	1	1
GC_00000323	1	1	1	1	1	1	1	1	1	1	1	1	1	1	1	1	1	1	1	1	1	1	1	1	1	1	1	1	1	1	1	1	1	1	1	1	1	1	1	1	1	1	1	1	1	1	1	1	1
GC_00000324	1	1	1	1	1	1	1	1	1	1	1	1	1	1	1	1	1	1	1	1	1	1	1	1	1	1	1	1	1	1	1	1	1	1	1	1	1	1	1	1	1	1	1	1	1	1	1	1	1
GC_00000325	1	0	1	1	1	1	1	1	1	1	1	1	1	1	1	1	1	1	1	1	1	1	1	1	1	1	1	1	1	1	1	1	1	1	1	1	1	1	1	1	1	1	1	1	1	1	1	1	1
GC_00000326	1	1	1	1	1	1	1	1	1	1	1	1	1	1	1	1	1	1	1	1	1	1	1	1	1	1	1	1	1	1	1	1	1	1	1	1	1	1	1	1	1	1	1	1	1	1	1	1	1
GC_00000327	1	1	1	1	1	1	1	1	1	1	1	1	1	1	1	1	1	1	1	1	1	1	1	1	1	1	1	1	1	1	1	1	1	1	1	1	1	1	1	1	1	1	1	1	1	1	1	1	1
GC_00000328	1	1	1	1	1	1	1	1	1	1	1	1	1	1	1	1	1	1	1	1	1	1	1	1	1	1	1	1	1	1	1	1	1	1	1	1	1	1	1	1	1	1	1	1	1	1	1	1	1
GC_00000329	1	1	1	1	1	1	1	1	1	1	1	1	1	1	1	1	1	1	1	1	1	1	1	1	1	1	1	1	1	1	1	1	1	1	1	1	1	1	1	1	1	1	1	1	1	1	1	1	1
GC_00000330	0	0	0	1	0	0	1	1	1	1	1	0	0	1	1	0	1	0	1	0	1	1	0	1	1	1	1	1	1	1	1	1	1	0	1	0	0	0	0	0	0	1	1	1	1	1	1	1	1
GC_00000331	1	1	1	1	1	1	1	1	1	1	1	1	1	1	1	1	1	1	1	1	1	1	1	1	1	1	1	1	1	1	1	1	1	1	1	1	1	1	1	1	1	1	1	1	1	1	1	1	1
GC_00000332	1	0	1	1	1	1	1	1	1	1	1	1	1	1	1	1	1	1	1	1	1	1	1	1	1	1	1	1	1	1	1	1	1	1	1	1	1	1	1	1	1	1	1	1	1	1	1	1	1
GC_00000333	1	1	1	1	1	1	1	1	1	1	1	1	1	1	1	1	1	1	1	1	1	1	1	1	1	1	1	1	1	1	1	1	1	1	1	1	1	1	1	1	1	1	1	1	1	1	1	1	1
GC_00000334	1	1	1	1	1	1	1	1	1	1	1	1	1	1	1	1	1	1	1	1	1	1	1	1	1	1	1	1	1	1	1	1	1	1	1	1	1	1	1	1	1	1	1	1	1	1	1	1	1
GC_00000335	1	1	1	1	1	1	1	1	1	1	1	1	1	1	1	1	1	1	1	1	1	1	1	1	1	1	1	1	1	1	1	1	1	1	1	1	1	1	1	1	1	1	1	1	1	1	1	1	1
GC_00000336	1	1	1	1	0	1	1	1	1	1	1	1	1	1	1	1	1	1	1	1	1	1	1	1	1	1	1	1	1	1	1	1	1	0	1	1	1	1	1	1	1	1	1	1	1	1	1	1	1
GC_00000337	1	1	1	1	1	1	1	1	1	1	1	1	1	1	1	1	1	1	1	1	1	1	1	1	1	1	1	1	1	1	1	1	1	1	1	1	1	1	1	1	1	1	1	1	1	1	1	1	1
GC_00000338	1	1	1	1	1	1	1	1	1	1	1	1	1	1	1	1	1	1	1	1	1	1	1	1	1	1	1	1	1	1	1	1	1	1	1	1	1	1	1	1	1	1	1	1	1	1	1	1	1
GC_00000339	1	1	1	1	0	1	1	1	1	1	1	1	1	1	1	1	1	1	1	1	1	1	1	1	1	1	1	1	1	1	1	1	1	1	1	1	1	1	1	1	1	1	1	1	1	1	1	1	1
GC_00000340	1	1	1	1	1	1	1	1	1	1	1	1	1	1	1	1	1	1	1	1	1	1	1	1	1	1	1	1	1	1	1	1	1	1	1	1	1	1	1	1	1	1	1	1	1	1	1	1	1
GC_00000341	1	1	1	1	1	1	1	1	1	1	1	1	1	1	1	1	1	1	1	1	1	1	1	1	1	1	1	1	1	1	1	1	1	1	1	1	1	1	1	1	1	1	1	1	1	1	1	1	1
GC_00000342	1	1	1	1	1	1	1	1	1	1	1	1	1	1	1	1	1	1	1	1	1	1	1	1	1	1	1	1	1	1	1	1	1	1	1	1	1	1	1	1	1	1	1	1	1	1	1	1	1
GC_00000343	1	1	1	1	1	1	1	1	1	1	1	1	1	1	1	1	1	1	1	1	1	1	1	1	1	1	1	1	1	1	1	1	1	1	1	1	1	1	1	1	1	1	1	1	1	1	1	1	1
GC_00000344	1	1	1	1	1	1	1	1	1	1	1	1	1	1	1	1	1	1	1	1	1	1	1	1	1	1	1	1	1	1	1	1	1	1	1	1	1	1	1	1	1	1	1	1	1	1	1	1	1
GC_00000345	1	1	1	1	1	1	1	1	1	1	1	1	1	1	1	1	1	1	1	1	1	1	1	1	1	1	1	1	1	1	1	1	1	1	1	1	1	1	1	1	1	1	1	1	1	1	1	1	1
GC_00000346	1	1	1	1	1	1	1	1	1	1	1	1	1	1	1	1	1	1	1	1	1	1	1	1	1	1	1	1	1	1	1	1	1	1	1	1	1	1	1	1	1	1	1	1	1	1	1	1	1
GC_00000347	1	1	1	1	1	1	1	1	1	1	1	1	1	1	1	1	1	1	1	1	1	1	1	1	1	1	1	1	1	1	1	1	1	1	1	1	1	1	1	1	1	1	1	1	1	1	1	1	1
GC_00000348	1	1	1	1	1	1	1	1	1	1	1	1	1	1	1	1	1	1	1	1	1	1	1	1	1	1	1	1	1	1	1	1	1	1	1	1	1	1	1	1	1	1	1	1	1	1	1	1	1
GC_00000349	1	1	1	1	1	1	1	1	1	1	1	1	1	1	1	1	1	1	1	1	1	1	1	1	1	1	1	1	1	1	1	1	1	1	1	1	1	1	1	1	1	1	1	1	1	1	1	1	1
GC_00000350	1	0	1	1	1	1	1	1	1	1	1	1	1	1	1	1	1	1	1	1	1	1	1	1	1	1	1	1	1	1	1	1	1	1	1	1	1	1	1	1	1	1	1	1	1	1	1	1	1
GC_00000351	1	1	1	1	1	1	1	1	1	1	1	1	1	1	1	1	1	1	1	1	1	1	1	1	1	1	1	1	1	1	1	1	1	1	1	1	1	1	1	1	1	1	1	1	1	1	1	1	1
GC_00000352	1	1	1	1	1	1	0	1	1	1	1	1	1	1	1	1	1	1	1	1	1	1	1	1	1	1	1	1	1	1	1	1	1	1	1	1	1	1	1	1	1	1	1	1	1	1	1	1	1
GC_00000353	1	1	1	1	0	1	1	1	1	1	1	1	1	1	1	1	1	1	1	1	1	1	1	1	1	1	1	1	1	1	1	1	1	1	1	1	1	1	1	1	1	1	1	1	1	1	1	1	1
GC_00000354	1	0	1	1	1	1	1	0	1	0	1	1	1	1	1	1	1	1	1	0	1	1	0	1	1	1	1	1	1	1	1	1	1	1	1	0	0	0	0	0	0	0	0	1	1	1	1	1	1
GC_00000355	1	1	1	0	0	1	0	0	1	0	0	1	0	1	1	0	1	1	0	0	1	1	0	1	1	1	1	1	1	1	1	1	1	0	0	0	0	0	0	0	0	0	0	1	1	1	1	1	1
GC_00000356	1	1	1	1	1	1	1	1	1	1	1	1	1	1	1	1	1	1	1	1	1	1	1	1	1	1	1	1	1	1	1	1	1	1	1	1	1	1	1	1	1	1	1	1	1	1	1	1	1
GC_00000357	0	1	1	1	0	1	1	1	1	0	1	1	0	1	1	1	1	1	1	0	1	1	0	1	1	1	1	1	1	1	1	1	1	1	1	0	0	0	0	0	0	0	0	1	1	1	1	1	1
GC_00000358	1	1	1	1	1	1	1	1	1	1	1	1	1	1	1	1	1	1	1	1	1	1	1	1	1	1	1	1	1	1	1	1	1	1	1	1	1	1	1	1	1	1	1	1	1	1	1	1	1
GC_00000359	1	1	1	1	1	1	1	1	1	1	1	1	1	1	1	1	1	1	1	1	1	1	1	1	1	1	1	1	1	1	1	1	1	1	1	1	1	1	1	1	1	1	1	1	1	1	1	1	1
GC_00000360	1	1	1	1	1	1	1	1	1	1	1	1	1	1	1	1	1	1	1	1	1	1	1	1	1	1	1	1	1	1	1	1	1	1	1	1	1	1	1	1	1	1	1	1	1	1	1	1	1
GC_00000361	0	1	0	1	0	0	1	0	0	0	1	1	0	1	0	0	0	1	0	0	1	0	0	0	0	0	0	0	1	0	0	0	0	0	0	0	0	0	0	0	0	0	0	0	0	0	0	0	0
GC_00000362	1	1	1	1	1	1	1	1	1	1	1	1	1	1	1	1	1	1	1	1	1	1	1	1	1	1	1	1	1	1	1	1	1	1	1	1	1	1	1	1	1	1	1	1	1	1	1	1	1
GC_00000363	1	1	1	1	1	1	1	1	1	1	1	1	1	1	1	1	1	1	1	1	1	1	1	1	1	1	1	1	1	1	1	1	1	1	1	1	1	1	1	1	1	1	1	1	1	1	1	1	1
GC_00000364	1	1	1	1	1	1	1	1	1	1	1	1	1	1	1	1	1	1	1	1	1	1	1	1	1	1	1	1	1	1	1	1	1	1	1	1	1	1	1	1	1	1	1	1	1	1	1	1	1
GC_00000365	1	1	1	1	1	1	1	1	1	1	1	1	1	1	1	1	1	1	1	1	1	1	1	1	1	1	1	1	1	1	1	1	1	1	1	1	1	1	1	1	1	1	1	1	1	1	1	1	1
GC_00000366	1	1	1	1	1	1	1	1	1	1	1	1	1	1	1	1	1	1	1	1	1	1	1	1	1	1	1	1	1	1	1	1	1	1	1	1	1	1	1	1	1	1	1	1	1	1	1	1	1
GC_00000367	1	1	1	1	1	1	1	1	1	1	1	1	1	1	1	1	1	1	1	1	1	1	1	1	1	1	1	1	1	1	1	1	1	1	1	1	1	1	1	1	1	1	1	1	1	1	1	1	1
GC_00000368	1	1	1	1	1	1	1	1	1	1	1	1	1	1	1	1	1	1	1	1	1	1	1	1	1	1	1	1	1	1	1	1	1	1	1	1	1	1	1	1	1	1	1	1	1	1	1	1	1
GC_00000369	1	1	1	1	1	1	1	1	1	1	1	1	1	1	1	1	1	1	1	1	1	1	1	1	1	1	1	1	1	1	1	1	1	1	1	1	1	1	1	1	1	1	1	1	1	1	1	1	1
GC_00000370	1	1	1	1	1	1	1	1	1	1	1	1	1	1	1	1	1	1	1	1	1	1	1	1	1	1	1	1	1	1	1	1	1	1	1	1	1	1	1	1	1	1	1	1	1	1	1	1	1
GC_00000371	1	1	1	1	1	1	1	1	1	1	1	1	1	1	1	1	1	1	1	1	1	1	1	1	1	1	1	1	1	1	1	1	1	1	1	1	1	1	1	1	1	1	1	1	1	1	1	1	1
GC_00000372	1	1	1	1	1	1	1	1	1	1	1	1	1	1	1	1	1	1	1	1	1	1	1	1	1	1	1	1	1	1	1	1	1	1	1	1	1	1	1	1	1	1	1	1	1	1	1	1	1
GC_00000373	1	1	1	1	1	1	1	1	1	1	1	1	1	1	1	1	1	1	1	1	1	1	1	1	1	1	1	1	1	1	1	1	1	1	1	1	1	1	1	1	1	1	1	1	1	1	1	1	1
GC_00000374	1	1	1	1	1	1	1	1	1	1	1	1	1	1	1	1	1	1	1	1	1	1	1	1	1	1	1	1	1	1	1	1	1	1	1	1	1	1	1	1	1	1	1	1	1	1	1	1	1
GC_00000375	1	1	1	1	1	1	1	1	1	1	1	1	1	1	1	1	1	1	1	1	1	1	1	1	1	1	1	1	1	1	1	1	1	1	1	1	1	1	1	1	1	1	1	1	1	1	1	1	1
GC_00000376	1	1	1	1	1	1	1	1	1	1	1	1	1	1	1	1	1	1	1	1	1	1	1	1	1	1	1	1	1	1	1	1	1	1	1	1	1	1	1	1	1	1	1	1	1	1	1	1	1
GC_00000377	1	1	1	1	1	1	1	1	1	1	1	1	1	1	1	1	1	1	1	1	1	1	1	1	1	1	1	1	1	1	1	1	1	1	1	1	1	1	1	1	1	1	1	1	1	1	1	1	1
GC_00000378	1	1	1	1	1	1	1	1	1	1	1	1	1	1	1	1	1	1	1	1	1	1	1	1	1	1	1	1	1	1	1	1	1	1	1	1	1	1	1	1	1	1	1	1	1	1	1	1	1
GC_00000379	1	1	1	1	1	1	1	1	1	1	1	1	1	1	1	1	1	1	1	1	1	1	1	1	1	1	1	1	1	1	1	1	1	1	1	1	1	1	1	1	1	1	1	1	1	1	1	1	1
GC_00000380	1	1	1	1	1	1	1	1	1	1	1	1	1	1	1	1	1	1	1	1	1	1	1	1	1	1	1	1	1	1	1	1	1	1	1	1	1	1	1	1	1	1	1	1	1	1	1	1	1
GC_00000381	1	1	1	1	1	1	1	1	1	1	1	1	1	1	1	1	1	1	1	1	1	1	1	1	1	1	1	1	1	1	1	1	1	1	1	1	1	1	1	1	1	1	1	1	1	1	1	1	1
GC_00000382	1	1	1	1	1	1	1	1	1	1	1	1	1	1	1	1	1	1	1	1	1	1	1	1	1	1	1	1	1	1	1	1	1	1	1	1	1	1	1	1	1	1	1	1	1	1	1	1	1
GC_00000383	1	1	1	1	1	1	1	1	1	1	1	1	1	1	1	1	1	1	1	1	1	1	1	1	1	1	1	1	1	1	1	1	1	1	1	1	1	1	1	1	1	1	1	1	1	1	1	1	1
GC_00000384	1	1	1	1	1	1	1	1	1	1	1	1	1	1	1	1	1	1	1	1	1	1	1	1	1	1	1	1	1	1	1	1	1	1	1	1	1	1	1	1	1	1	1	1	1	1	1	1	1
GC_00000385	1	1	1	1	1	1	1	1	1	1	1	1	1	1	1	1	1	1	1	1	1	1	1	1	1	1	1	1	1	1	1	1	1	1	1	1	1	1	1	1	1	1	1	1	1	1	1	1	1
GC_00000386	1	1	1	1	1	1	1	1	1	1	1	1	1	1	1	1	1	1	1	1	1	1	1	1	1	1	1	1	1	1	1	1	1	1	1	1	1	1	1	1	1	1	1	1	1	1	1	1	1
GC_00000387	1	1	1	1	1	1	1	1	1	1	1	1	1	1	1	1	1	1	1	1	1	1	1	1	1	1	1	1	1	1	1	1	1	1	1	1	1	1	1	1	1	1	1	1	1	1	1	1	1
GC_00000388	1	1	1	1	1	1	1	1	1	1	1	1	1	1	1	1	1	1	1	1	1	1	1	1	1	1	1	1	1	1	1	1	1	1	1	1	1	1	1	1	1	1	1	1	1	1	1	1	1
GC_00000389	1	1	1	1	1	1	1	1	1	1	1	1	1	1	1	1	1	1	1	1	1	1	1	1	1	1	1	1	1	1	1	1	1	1	1	1	1	1	1	1	1	1	1	1	1	1	1	1	1
GC_00000390	1	1	1	1	1	1	1	1	1	1	1	1	1	1	1	1	1	1	1	1	1	1	1	1	1	1	1	1	1	1	1	1	1	1	1	1	1	1	1	1	1	1	1	1	1	1	1	1	1
GC_00000391	1	1	1	1	1	1	1	1	1	1	1	1	1	1	1	1	1	1	1	1	1	1	1	1	1	1	1	1	1	1	1	1	1	1	1	1	1	1	1	1	1	1	1	1	1	1	1	1	1
GC_00000392	1	1	1	1	1	1	1	1	1	1	1	1	1	1	1	1	1	1	1	1	1	1	1	1	1	1	1	1	1	1	1	1	1	1	1	1	1	1	1	1	1	1	1	1	1	1	1	1	1
GC_00000393	1	1	1	1	1	1	1	1	1	1	1	1	1	1	1	1	1	1	1	1	1	1	1	1	1	1	1	1	1	1	1	1	1	1	1	1	1	1	1	1	1	1	1	1	1	1	1	1	1
GC_00000394	1	1	1	0	1	1	1	1	1	1	1	1	1	1	1	1	1	1	1	1	1	1	1	1	1	1	1	1	1	1	1	1	1	1	1	1	1	1	1	1	1	1	1	1	1	1	1	1	1
GC_00000395	1	1	1	1	1	1	1	1	1	1	1	1	1	1	1	1	1	1	1	1	1	1	1	1	1	1	1	1	1	1	1	1	1	1	1	1	1	1	1	1	1	1	1	1	1	1	1	1	1
GC_00000396	1	1	1	1	1	1	1	1	1	1	1	1	1	1	1	1	1	1	1	1	1	1	1	1	1	1	1	1	1	1	1	1	1	1	1	1	1	1	1	1	1	1	1	1	1	1	1	1	1
GC_00000397	1	1	1	1	1	1	1	1	1	1	1	1	1	1	1	1	1	1	1	1	1	1	1	1	1	1	1	1	1	1	1	1	1	1	1	1	1	1	1	1	1	1	1	1	1	1	1	1	1
GC_00000398	1	1	1	1	1	1	1	1	1	1	1	1	1	1	1	1	1	1	1	1	1	1	1	1	1	1	1	1	1	1	1	1	1	1	1	1	1	1	1	1	1	1	1	1	1	1	1	1	1
GC_00000399	1	1	1	1	1	1	1	1	1	1	1	1	1	1	1	1	1	1	1	1	1	1	1	1	1	1	1	1	1	1	1	1	1	1	1	1	1	1	1	1	1	1	1	1	1	1	1	1	1
GC_00000400	1	1	1	1	1	1	1	1	1	1	1	1	1	1	1	1	1	1	1	1	1	1	1	1	1	1	1	1	1	1	1	1	1	1	1	1	1	1	1	1	1	1	1	1	1	1	1	1	1
GC_00000401	1	1	1	1	1	1	1	1	1	1	1	1	1	1	1	1	1	1	1	1	1	1	1	1	1	1	1	1	1	1	1	1	1	1	1	1	1	1	1	1	1	1	1	1	1	1	1	1	1
GC_00000402	1	1	1	1	1	1	1	1	1	1	1	1	1	1	1	1	1	1	1	1	1	1	1	1	1	1	1	1	1	1	1	1	1	1	1	1	1	1	1	1	1	1	1	1	1	1	1	1	1
GC_00000403	1	1	1	1	1	1	1	1	1	1	1	1	1	1	1	1	1	1	1	1	1	1	1	1	1	1	1	1	1	1	1	1	1	1	1	1	1	1	1	1	1	1	1	1	1	1	1	1	1
GC_00000404	1	1	1	1	1	1	1	1	1	1	1	1	1	1	1	1	1	1	1	1	1	1	1	1	1	1	1	1	1	1	1	1	1	1	1	1	1	1	1	1	1	1	1	1	1	1	1	1	1
GC_00000405	0	1	1	1	1	1	1	1	1	1	1	1	1	1	1	1	1	1	1	1	1	1	1	1	1	1	1	1	1	1	1	1	1	1	1	1	1	1	1	1	1	1	1	1	1	1	1	1	1
GC_00000406	1	1	1	1	1	1	1	1	1	1	1	1	1	1	1	1	1	1	1	1	1	1	1	1	1	1	1	1	1	1	1	1	1	1	1	1	1	1	1	1	1	1	1	1	1	1	1	1	1
GC_00000407	1	1	1	1	1	1	1	1	1	1	1	1	1	1	1	1	1	1	1	1	1	1	1	1	1	1	1	1	1	1	1	1	1	1	1	1	1	1	1	1	1	1	1	1	1	1	1	1	1
GC_00000408	1	1	1	1	1	1	1	1	1	1	1	1	1	1	1	1	1	1	1	1	1	1	1	1	1	1	1	1	1	1	1	1	1	1	1	1	1	1	1	1	1	1	1	1	1	1	1	1	1
GC_00000409	1	1	1	1	1	1	1	1	1	1	1	1	1	1	1	1	1	1	1	1	1	1	1	1	1	1	1	1	1	1	1	1	1	1	1	1	1	1	1	1	1	1	1	1	1	1	1	1	1
GC_00000410	1	1	1	1	1	1	1	1	1	1	1	1	1	1	1	1	1	1	1	1	1	1	1	1	1	1	1	1	1	1	1	1	1	1	1	1	1	1	1	1	1	1	1	1	1	1	1	1	1
GC_00000411	1	1	1	1	1	1	1	1	1	1	1	1	1	1	1	1	1	1	1	1	1	1	1	1	1	1	1	1	1	1	1	1	1	1	1	1	1	1	1	1	1	1	1	1	1	1	1	1	1
GC_00000412	1	1	1	1	1	1	1	1	1	1	1	1	1	1	1	1	1	1	1	1	1	1	1	1	1	1	1	1	1	1	1	1	1	1	1	1	1	1	1	1	1	1	1	1	1	1	1	1	1
GC_00000413	1	1	1	1	1	1	1	1	1	1	1	1	1	1	1	1	1	1	1	1	1	1	1	1	1	1	1	1	1	1	1	1	1	1	1	1	1	1	1	1	1	1	1	1	1	1	1	1	1
GC_00000414	1	1	1	1	1	1	1	1	1	1	1	1	1	1	1	1	1	1	1	1	1	1	1	1	1	1	1	1	1	1	1	1	1	1	1	1	1	1	1	1	1	1	1	1	1	1	1	1	1
GC_00000415	1	1	1	1	1	1	1	1	1	1	1	1	1	1	1	1	1	1	1	1	1	1	1	1	1	1	1	1	1	1	1	1	1	1	1	1	1	1	1	1	1	1	1	1	1	1	1	1	1
GC_00000416	1	1	1	1	1	1	1	1	1	1	1	1	1	1	1	1	1	1	1	1	1	1	1	1	1	1	1	1	1	1	1	1	1	1	1	1	1	1	1	1	1	1	1	1	1	1	1	1	1
GC_00000417	1	1	1	1	1	1	1	1	1	1	1	1	1	1	1	1	1	1	1	1	1	1	1	1	1	1	1	1	1	1	1	1	1	1	1	1	1	1	1	1	1	1	1	1	1	1	1	1	1
GC_00000418	1	1	1	1	1	1	1	1	1	1	1	1	1	1	1	1	1	1	1	1	1	1	1	1	1	1	1	1	1	1	1	1	1	1	1	1	1	1	1	1	1	1	1	1	1	1	1	1	1
GC_00000419	1	1	1	1	1	1	1	1	1	1	1	1	1	1	1	1	1	1	1	1	1	1	1	1	1	1	1	1	1	1	1	1	1	1	1	1	1	1	1	1	1	1	1	1	1	1	1	1	1
GC_00000420	1	1	1	1	1	1	1	1	1	1	1	1	1	1	1	1	1	1	1	1	1	1	1	1	1	1	1	1	1	1	1	1	1	1	1	1	1	1	1	1	1	1	1	1	1	1	1	1	1
GC_00000421	1	1	1	1	1	1	1	1	1	1	1	1	1	1	1	1	1	1	1	1	1	1	1	1	1	1	1	1	1	1	1	1	1	1	1	1	1	1	1	1	1	1	1	1	1	1	1	1	1
GC_00000422	1	1	1	1	1	1	1	1	1	1	1	1	1	1	1	1	1	1	1	1	1	1	1	1	1	1	1	1	1	1	1	1	1	1	1	1	1	1	1	1	1	1	1	1	1	1	1	1	1
GC_00000423	1	1	1	1	1	1	1	1	1	1	1	1	1	1	1	1	1	1	1	1	1	1	1	1	1	1	1	1	1	1	1	1	1	1	1	1	1	1	1	1	1	1	1	1	1	1	1	1	1
GC_00000424	1	1	1	1	1	1	1	1	1	1	1	1	1	1	1	1	1	1	1	1	1	1	1	1	1	1	1	1	1	1	1	1	1	1	1	1	1	1	1	1	1	1	1	1	1	1	1	1	1
GC_00000425	1	1	1	1	1	1	1	1	1	1	1	1	1	1	1	1	1	1	1	1	1	1	1	1	1	1	1	1	1	1	1	1	1	1	1	1	1	1	1	1	1	1	1	1	1	1	1	1	1
GC_00000426	1	1	1	1	1	1	1	1	1	1	1	1	1	1	1	1	1	1	1	1	1	1	1	1	1	1	1	1	1	1	1	1	1	1	1	1	1	1	1	1	1	1	1	1	1	1	1	1	1
GC_00000427	1	1	1	1	1	1	1	1	1	1	1	1	1	1	1	1	1	1	1	1	1	1	1	1	1	1	1	1	1	1	1	1	1	1	1	1	1	1	1	1	1	1	1	1	1	1	1	1	1
GC_00000428	1	1	1	1	1	1	1	1	1	1	1	1	1	1	1	1	1	1	1	1	1	1	1	1	1	1	1	1	1	1	1	1	1	1	1	1	1	1	1	1	1	1	1	1	1	1	1	1	1
GC_00000429	1	1	1	1	1	1	1	1	1	1	1	1	1	1	1	1	1	1	1	1	1	1	1	1	1	1	1	1	1	1	1	1	1	1	1	1	1	1	1	1	1	1	1	1	1	1	1	1	1
GC_00000430	1	1	1	1	1	1	1	1	1	1	1	1	1	1	1	1	1	1	1	1	1	1	1	1	1	1	1	1	1	1	1	1	1	1	1	1	1	1	1	1	1	1	1	1	1	1	1	1	1
GC_00000431	1	1	1	1	1	1	1	1	1	1	1	1	1	1	1	1	1	1	1	1	1	1	1	1	1	1	1	1	1	1	1	1	1	1	1	1	1	1	1	1	1	1	1	1	1	1	1	1	1
GC_00000432	1	1	1	1	1	1	1	1	1	1	1	1	1	1	1	1	1	1	1	1	1	1	1	1	1	1	1	1	1	1	1	1	1	1	1	1	1	1	1	1	1	1	1	1	1	1	1	1	1
GC_00000433	1	1	1	1	1	1	1	1	1	1	1	1	1	1	1	1	1	1	1	1	1	1	1	1	1	1	1	1	1	1	1	1	1	1	1	1	1	1	1	1	1	1	1	1	1	1	1	1	1
GC_00000434	1	1	1	1	1	1	1	1	1	1	1	1	1	1	1	1	1	1	1	1	1	1	1	1	1	1	1	1	1	1	1	1	1	1	1	1	1	1	1	1	1	1	1	1	1	1	1	1	1
GC_00000435	1	1	1	1	1	1	1	1	1	1	1	1	1	1	1	1	1	1	1	1	1	1	1	1	1	1	1	1	1	1	1	1	1	1	1	1	1	1	1	1	1	1	1	1	1	1	1	1	1
GC_00000436	1	1	1	1	1	1	1	1	1	1	1	1	1	1	1	1	1	1	1	1	1	1	1	1	1	1	1	1	1	1	1	1	1	1	1	1	1	1	1	1	1	1	1	1	1	1	1	1	1
GC_00000437	1	1	1	1	1	1	1	1	1	1	1	1	1	1	1	1	1	1	1	1	1	1	1	1	1	1	1	1	1	1	1	1	1	1	1	1	1	1	1	1	1	1	1	1	1	1	1	1	1
GC_00000438	1	1	1	0	1	1	1	1	1	1	1	1	1	1	1	1	1	1	1	1	1	1	1	1	1	1	1	1	1	1	1	1	1	1	1	1	1	1	1	1	1	1	1	1	1	1	1	1	1
GC_00000439	1	1	1	1	1	1	1	1	1	1	1	1	1	1	1	1	1	1	1	1	1	1	1	1	1	1	1	1	1	1	1	1	1	1	1	1	1	1	1	1	1	1	1	1	1	1	1	1	1
GC_00000440	1	1	1	1	1	1	1	1	1	1	1	1	1	1	1	1	1	1	1	1	1	1	1	1	1	1	1	1	1	1	1	1	1	1	1	1	1	1	1	1	1	1	1	1	1	1	1	1	1
GC_00000441	1	1	1	1	1	1	1	1	1	1	1	1	1	1	1	1	1	1	1	1	1	1	1	1	1	1	1	1	1	1	1	1	1	1	1	1	1	1	1	1	1	1	1	1	1	1	1	1	1
GC_00000442	1	1	1	1	1	1	1	1	1	1	1	1	1	1	1	1	1	1	1	1	1	1	1	1	1	1	1	1	1	1	1	1	1	1	1	1	1	1	1	1	1	1	1	1	1	1	1	1	1
GC_00000443	1	1	1	1	1	1	1	1	1	1	1	1	1	1	1	1	1	1	1	1	1	1	1	1	1	1	1	1	1	1	1	1	1	1	1	1	1	1	1	1	1	1	1	1	1	1	1	1	1
GC_00000444	1	1	1	1	1	1	1	1	1	1	1	1	1	1	1	1	1	1	1	1	1	1	1	1	1	1	1	1	1	1	1	1	1	1	1	1	1	1	1	1	1	1	1	1	1	1	1	1	1
GC_00000445	1	1	1	1	1	1	1	1	1	1	1	1	1	1	1	1	1	1	1	1	1	1	1	1	1	1	1	1	1	1	1	1	1	1	1	1	1	1	1	1	1	1	1	1	1	1	1	1	1
GC_00000446	1	1	1	1	1	1	1	1	1	1	1	1	1	1	1	1	1	1	1	1	1	1	1	1	1	1	1	1	1	1	1	1	1	1	1	1	1	1	1	1	1	1	1	1	1	1	1	1	1
GC_00000447	1	1	1	1	1	1	1	1	1	1	1	1	1	1	1	1	1	1	1	1	1	1	1	1	1	1	1	1	1	1	1	1	1	1	1	1	1	1	1	1	1	1	1	1	1	1	1	1	1
GC_00000448	1	1	1	1	0	1	1	1	1	1	1	1	1	1	1	1	1	1	1	1	1	1	1	1	1	1	1	1	1	1	1	1	1	1	1	1	1	1	1	1	1	1	1	1	1	1	1	1	1
GC_00000449	1	1	1	1	1	1	1	1	1	1	1	1	1	1	1	1	1	1	1	1	1	1	1	1	1	1	1	1	1	1	1	1	1	1	1	1	1	1	1	1	1	1	1	1	1	1	1	1	1
GC_00000450	1	0	1	1	1	1	1	1	1	1	1	1	1	1	1	1	1	1	1	1	1	1	1	1	1	1	1	1	1	1	1	1	1	1	1	1	1	1	1	1	1	1	1	1	1	1	1	1	1
GC_00000451	1	1	1	1	1	1	1	1	1	1	1	1	1	1	1	1	1	1	1	1	1	1	1	1	1	1	1	1	1	1	1	1	1	1	1	1	1	1	1	1	1	1	1	1	1	1	1	1	1
GC_00000452	1	1	1	1	1	1	1	1	1	1	1	1	1	1	1	1	1	1	1	1	1	1	1	1	1	1	1	1	1	1	1	1	1	1	1	1	1	1	1	1	1	1	1	1	1	1	1	1	1
GC_00000453	1	1	1	1	1	1	1	1	1	1	1	1	1	1	1	1	1	1	1	1	1	1	1	1	1	1	1	1	1	1	1	1	1	1	1	1	1	1	1	1	1	1	1	1	1	1	1	1	1
GC_00000454	1	1	1	1	1	1	1	1	1	1	1	1	1	1	1	1	1	1	1	1	1	1	1	1	1	1	1	1	1	1	1	1	1	1	1	1	1	1	1	1	1	1	1	1	1	1	1	1	1
GC_00000455	1	1	1	1	1	1	1	1	1	1	1	1	1	1	1	1	1	1	1	1	1	1	1	1	1	1	1	1	1	1	1	1	1	1	1	1	1	1	1	1	1	1	1	1	1	1	1	1	1
GC_00000456	1	1	1	1	1	1	1	1	1	1	1	1	1	1	1	1	1	1	1	1	1	1	1	1	1	1	1	1	1	1	1	1	1	1	1	1	1	1	1	1	1	1	1	1	1	1	1	1	1
GC_00000457	1	1	1	1	1	1	1	1	1	1	1	1	1	1	1	1	1	1	1	1	1	1	1	1	1	1	1	1	1	1	1	1	1	1	1	1	1	1	1	1	1	1	1	1	1	1	1	1	1
GC_00000458	1	1	1	1	1	1	0	1	1	1	1	1	1	1	1	1	1	1	1	1	1	1	1	1	1	1	1	1	1	1	1	1	1	1	1	1	1	1	1	1	1	1	1	1	1	1	1	1	1
GC_00000459	1	1	1	1	1	1	1	1	1	1	1	1	1	1	1	1	1	1	1	1	1	1	1	1	1	1	1	1	1	1	1	1	1	1	1	1	1	1	0	1	1	1	1	1	1	1	1	1	1
GC_00000460	1	1	1	1	1	1	1	1	1	1	1	1	1	1	1	1	1	1	1	1	1	1	1	1	1	1	1	1	1	1	1	1	1	1	1	1	1	1	1	1	1	1	1	1	1	1	1	1	1
GC_00000461	1	1	1	1	1	1	1	1	1	1	1	1	1	1	1	1	1	1	1	1	1	1	1	1	1	1	1	1	1	1	1	1	1	1	1	1	1	1	1	1	1	1	1	1	1	1	1	1	1
GC_00000462	1	1	1	1	1	1	1	1	1	1	1	1	1	1	1	1	1	1	1	1	1	1	1	1	1	1	1	1	1	1	1	1	1	1	1	1	1	1	1	1	1	1	1	1	1	1	1	1	1
GC_00000463	1	1	1	1	1	1	1	1	1	1	1	1	1	1	1	1	1	1	1	1	1	1	1	1	1	1	1	1	1	1	1	1	1	1	1	1	1	1	1	1	1	1	1	1	1	1	1	1	1
GC_00000464	1	1	1	1	1	1	1	1	1	1	1	1	1	1	1	1	1	1	1	1	1	1	1	1	1	1	1	1	1	1	1	1	1	1	1	1	1	1	1	1	1	1	1	1	1	1	1	1	1
GC_00000465	1	1	1	1	1	1	1	1	1	1	1	1	1	1	1	1	1	1	1	1	1	1	1	1	1	1	1	1	1	1	1	1	1	1	1	1	1	1	1	1	1	1	1	1	1	1	1	1	1
GC_00000466	1	1	1	1	1	1	1	1	1	1	1	1	1	1	1	1	1	1	1	1	1	1	1	1	1	1	1	1	1	1	1	1	1	1	1	1	1	1	1	1	1	1	1	1	1	1	1	1	1
GC_00000467	1	1	1	1	1	1	1	1	1	1	1	1	1	1	1	1	1	1	1	1	1	1	1	1	1	1	1	1	1	1	1	1	1	1	1	1	1	1	1	1	1	1	1	1	1	1	1	1	1
GC_00000468	1	1	1	1	1	1	1	1	1	1	1	1	1	1	1	1	1	1	1	1	1	1	1	1	1	1	1	1	1	1	1	1	1	1	1	1	1	1	1	1	1	1	1	1	1	1	1	1	1
GC_00000469	1	1	1	1	1	1	1	1	1	1	1	1	1	1	1	1	1	1	1	1	1	1	1	1	1	1	1	1	1	1	1	1	1	1	1	1	1	1	1	1	1	1	1	1	1	1	1	1	1
GC_00000470	0	1	1	1	1	1	1	1	1	1	1	1	1	1	1	1	1	1	1	1	1	1	1	1	1	1	1	1	1	1	1	1	1	1	1	1	1	1	1	1	1	1	1	1	1	1	1	1	1
GC_00000471	1	1	1	1	1	1	0	1	1	1	1	1	1	1	1	1	1	1	1	1	1	1	1	1	1	1	1	1	1	1	1	1	1	1	1	1	1	1	1	1	1	1	1	1	1	1	1	1	1
GC_00000472	1	1	1	1	1	1	1	1	1	1	1	1	1	1	1	1	1	1	1	1	1	1	1	1	1	1	1	1	1	1	1	1	1	1	1	1	1	1	1	1	1	1	1	1	1	1	1	1	1
GC_00000473	1	1	1	1	1	1	1	1	1	1	1	1	1	1	1	1	1	1	1	1	1	1	1	1	1	1	1	1	1	1	1	1	1	1	1	1	1	1	1	1	1	1	1	1	1	1	1	1	1
GC_00000474	1	1	1	1	1	1	1	1	1	1	1	1	1	1	1	1	1	1	1	1	1	1	1	1	1	1	1	1	1	1	1	1	1	1	1	1	1	1	1	1	1	1	1	1	1	1	1	1	1
GC_00000475	1	1	1	1	0	1	0	0	1	1	1	1	1	1	1	1	1	1	1	1	1	1	1	1	1	1	1	1	1	1	1	1	1	1	1	1	1	1	1	1	1	1	1	1	1	1	1	1	1
GC_00000476	1	1	1	1	1	1	1	1	1	1	1	1	1	1	1	1	1	1	1	1	1	1	1	1	1	1	1	1	1	1	1	1	1	1	1	1	1	1	1	1	1	1	1	1	1	1	1	1	1
GC_00000477	1	1	1	1	1	1	1	1	1	1	1	1	1	1	1	1	1	1	1	1	1	1	1	1	1	1	1	1	1	1	1	1	1	1	1	1	1	1	1	1	1	1	1	1	1	1	1	1	1
GC_00000478	1	1	1	1	1	1	1	1	1	1	1	1	1	1	1	1	1	1	1	1	1	1	1	1	1	1	1	1	1	1	1	1	1	1	1	1	1	1	1	1	1	1	1	1	1	1	1	1	1
GC_00000479	1	1	1	1	1	1	1	1	1	1	1	1	1	1	1	1	1	1	1	1	1	1	1	1	1	1	1	1	1	1	1	1	1	1	1	1	1	1	1	1	1	1	1	1	1	1	1	1	1
GC_00000480	1	1	1	1	1	1	1	1	1	1	1	1	1	1	1	1	1	1	1	1	1	1	1	1	1	1	1	1	1	1	1	1	1	1	1	1	1	1	1	1	1	1	1	1	1	1	1	1	1
GC_00000481	1	1	1	1	1	1	1	1	1	1	1	1	1	1	1	1	1	1	1	1	1	1	1	1	1	1	1	1	1	1	1	1	1	1	1	1	1	1	1	1	1	1	1	1	1	1	1	1	1
GC_00000482	1	1	1	1	1	1	1	1	1	1	1	1	1	1	1	1	1	1	1	1	1	1	1	1	1	1	1	1	1	1	1	1	1	1	1	1	1	1	1	1	1	1	1	1	1	1	1	1	1
GC_00000483	1	1	1	1	1	1	1	1	1	1	1	1	1	1	1	1	1	1	1	1	1	1	1	1	1	1	1	1	1	1	1	1	1	1	1	1	1	1	1	1	1	1	1	1	1	1	1	1	1
GC_00000484	1	1	1	1	1	1	1	1	1	1	1	1	1	1	1	1	1	1	1	1	1	1	1	1	1	1	1	1	1	1	1	1	1	1	1	1	1	1	1	1	1	1	1	1	1	1	1	1	1
GC_00000485	1	1	1	1	1	1	1	1	1	1	1	1	1	1	1	1	1	1	1	1	1	1	1	1	1	1	1	1	1	1	1	1	1	1	1	1	1	1	1	1	1	1	1	1	1	1	1	1	1
GC_00000486	1	1	1	1	1	1	1	1	1	1	1	1	1	1	1	1	1	1	1	1	1	1	1	1	1	1	1	1	1	1	1	1	1	1	1	1	1	1	1	1	1	1	1	1	1	1	1	1	1
GC_00000487	1	1	1	1	1	1	1	1	1	1	1	1	1	1	1	1	1	1	1	1	1	1	1	1	1	1	1	1	1	1	1	1	1	1	1	1	1	1	1	1	1	1	1	1	1	1	1	1	1
GC_00000488	1	1	1	1	1	1	1	1	1	1	1	1	1	1	1	1	1	1	1	1	1	1	1	1	1	1	1	1	1	1	1	1	1	1	1	1	1	1	1	1	1	1	1	1	1	1	1	1	1
GC_00000489	1	0	1	1	1	1	1	1	1	1	1	1	1	1	1	1	1	1	1	1	1	1	1	1	1	1	1	1	1	1	1	1	1	1	1	1	1	1	1	1	1	1	1	1	1	1	1	1	1
GC_00000490	1	1	1	1	1	1	1	1	1	1	1	1	1	1	1	1	1	1	1	1	1	1	1	1	1	1	1	1	1	1	1	1	1	1	1	1	1	1	1	1	1	1	1	1	1	1	1	1	1
GC_00000491	1	1	1	1	1	1	1	1	1	1	1	1	1	1	1	1	1	1	1	1	1	1	1	1	1	1	1	1	1	1	1	1	1	1	1	1	1	1	1	1	1	1	1	1	1	1	1	1	1
GC_00000492	0	1	0	0	0	0	0	1	1	0	1	0	0	1	1	0	1	0	1	0	1	1	0	1	1	1	1	1	1	1	1	1	1	0	0	0	0	0	0	0	0	0	0	1	1	1	1	1	1
GC_00000493	1	1	1	1	1	1	1	1	1	1	1	1	1	1	1	1	1	1	1	1	1	1	1	1	1	1	1	1	1	1	1	1	1	1	1	1	1	1	1	1	1	1	1	1	1	1	1	1	1
GC_00000494	1	1	1	1	1	1	1	1	1	1	1	1	1	1	1	1	1	1	1	1	1	1	1	1	1	1	1	1	1	1	1	1	1	1	1	1	1	1	1	1	1	1	1	1	1	1	1	1	1
GC_00000495	1	1	1	1	1	1	1	0	1	1	1	1	1	1	1	1	1	1	1	1	1	1	1	1	1	1	1	1	1	1	1	1	1	1	1	1	1	1	1	1	1	1	1	1	1	1	1	1	1
GC_00000496	1	1	1	1	1	1	1	1	1	1	1	1	1	1	1	1	1	1	1	1	1	1	1	1	1	1	1	1	1	1	1	1	1	1	1	1	1	1	1	1	1	1	1	1	1	1	1	1	1
GC_00000497	1	1	1	1	1	1	1	0	1	1	1	1	1	1	1	1	1	1	1	1	1	1	1	1	1	1	1	1	1	1	1	1	1	1	1	1	1	1	1	1	1	1	1	1	1	1	1	1	1
GC_00000498	1	1	1	1	1	1	1	1	1	1	1	1	1	1	1	1	1	1	1	1	1	1	1	1	1	1	1	1	1	1	1	1	1	1	1	1	1	1	1	1	1	1	1	1	1	1	1	1	1
GC_00000499	1	1	1	1	1	1	1	1	1	1	1	1	1	1	1	1	1	1	1	1	1	1	1	1	1	1	1	1	1	1	1	1	1	1	1	1	1	1	1	1	1	1	1	1	1	1	1	1	1
GC_00000500	1	1	1	1	1	1	1	1	1	1	1	1	1	1	1	1	1	1	1	1	1	1	1	1	1	1	1	1	1	1	1	1	1	1	1	1	1	1	1	1	1	1	1	1	1	1	1	1	1
GC_00000501	1	1	1	1	1	1	1	1	1	1	1	1	1	1	1	1	1	1	1	1	1	1	1	1	1	1	1	1	1	1	1	1	1	1	1	1	1	1	1	1	1	1	1	1	1	1	1	1	1
GC_00000502	1	1	1	1	1	1	1	1	1	1	1	1	1	1	1	1	1	1	1	1	1	1	1	1	1	1	1	1	1	1	1	1	1	1	1	1	1	1	1	1	1	1	1	1	1	1	1	1	1
GC_00000503	1	1	1	1	0	1	1	1	1	1	1	1	1	1	1	1	1	1	1	1	1	1	1	1	1	1	1	1	1	1	1	1	1	1	1	1	1	1	1	1	1	1	1	1	1	1	1	1	1
GC_00000504	1	1	1	1	1	1	1	1	1	1	1	1	1	1	1	1	1	1	1	1	1	1	1	1	1	1	1	1	1	1	1	1	1	1	1	1	1	1	1	1	1	1	1	1	1	1	1	1	1
GC_00000505	1	1	1	1	1	1	1	1	1	1	1	1	1	1	1	1	1	1	1	1	1	1	1	1	1	1	1	1	1	1	1	1	1	1	1	1	1	1	1	1	1	1	1	1	1	1	1	1	1
GC_00000506	1	1	1	1	1	1	1	1	1	1	1	1	1	1	1	1	1	1	1	1	1	1	1	1	1	1	1	1	1	1	1	1	1	1	1	1	1	1	1	1	1	1	1	1	1	1	1	1	1
GC_00000507	1	1	1	1	1	1	1	1	1	1	1	1	1	1	1	1	1	1	1	1	1	1	1	1	1	1	1	1	1	1	1	1	1	1	1	1	1	1	1	1	1	1	1	1	1	1	1	1	1
GC_00000508	1	1	1	1	1	1	1	1	1	1	1	1	1	1	1	1	1	1	1	1	1	1	1	1	1	1	1	1	1	1	1	1	1	1	1	1	1	1	1	1	1	1	1	1	1	1	1	1	1
GC_00000509	1	1	1	0	1	1	1	1	1	1	1	1	1	1	1	1	1	1	1	1	1	1	1	1	1	1	1	1	1	1	1	1	1	1	1	1	1	1	1	1	1	1	1	1	1	1	1	1	1
GC_00000510	1	1	1	1	0	1	1	1	1	1	1	1	1	1	1	1	1	1	1	1	1	1	1	1	1	1	1	1	1	1	1	1	1	1	1	1	1	1	1	1	1	1	1	1	1	1	1	1	1
GC_00000511	1	1	1	1	1	1	1	1	1	1	1	1	1	1	1	1	1	1	1	1	1	1	1	1	1	1	1	1	1	1	1	1	1	1	1	1	1	1	1	1	1	1	1	1	1	1	1	1	1
GC_00000512	1	1	1	0	1	1	1	1	1	1	1	1	1	1	1	1	1	1	1	1	1	1	1	1	1	1	1	1	1	1	1	1	1	1	1	1	1	1	1	1	1	1	1	1	1	1	1	1	1
GC_00000513	1	1	1	1	1	1	1	1	1	1	1	1	1	1	1	1	1	1	1	1	1	1	1	1	1	1	1	1	1	1	1	1	1	1	1	1	1	1	1	1	1	1	1	1	1	1	1	1	1
GC_00000514	1	0	1	1	1	1	1	1	1	1	1	1	1	1	1	1	1	1	1	1	1	1	1	1	1	1	1	1	1	1	1	1	1	1	1	1	1	1	1	1	1	1	1	1	1	1	1	1	1
GC_00000515	1	1	1	0	1	1	1	1	1	1	1	1	1	1	1	1	1	1	1	1	1	1	1	1	1	1	1	1	1	1	1	1	1	1	1	1	1	1	1	1	1	1	1	1	1	1	1	1	1
GC_00000516	1	1	1	1	1	1	1	1	1	1	1	1	1	1	1	1	1	1	1	1	1	1	1	1	1	1	1	1	1	1	1	1	1	1	1	1	1	1	1	1	1	1	1	1	1	1	1	1	1
GC_00000517	1	1	1	1	1	1	1	1	1	1	1	1	1	1	1	1	1	1	1	1	1	1	1	1	1	1	1	1	1	1	1	1	1	1	1	1	1	1	1	1	1	1	1	1	1	1	1	1	1
GC_00000518	1	1	1	1	1	1	1	1	1	1	1	1	1	1	1	1	1	1	1	1	1	1	1	1	1	1	1	1	1	1	1	1	1	1	1	1	1	1	1	1	1	1	1	1	1	1	1	1	1
GC_00000519	1	1	1	1	1	1	1	1	1	1	1	1	1	1	1	1	1	1	1	1	1	1	1	1	1	1	1	1	1	1	1	1	1	1	1	1	1	1	1	1	1	1	1	1	1	1	1	1	1
GC_00000520	1	1	1	1	1	1	1	1	1	1	1	1	1	1	1	1	1	1	1	1	1	1	1	1	1	1	1	1	1	1	1	1	1	1	1	1	1	1	1	1	1	1	1	1	1	1	1	1	1
GC_00000521	1	1	1	1	1	1	1	1	1	1	1	1	1	1	1	1	1	1	1	1	1	1	1	1	1	1	1	1	1	1	1	1	1	1	1	1	1	1	1	1	1	1	1	1	1	1	1	1	1
GC_00000522	1	1	1	1	1	1	1	1	1	1	1	1	1	1	1	1	1	1	1	1	1	1	1	1	1	1	1	1	1	1	1	1	1	1	1	1	1	1	1	1	1	1	1	1	1	1	1	1	1
GC_00000523	1	1	1	1	1	1	1	1	1	1	1	1	1	1	1	1	1	1	1	1	1	1	1	1	1	1	1	1	1	1	1	1	1	1	1	1	1	1	1	1	1	1	1	1	1	1	1	1	1
GC_00000524	1	1	1	1	1	1	1	1	1	1	1	1	1	1	1	1	1	1	1	1	1	1	1	1	1	1	1	1	1	1	1	1	1	1	1	1	1	1	1	1	1	1	1	1	1	1	1	1	1
GC_00000525	1	1	1	1	1	1	1	1	1	1	1	1	1	1	1	1	1	1	1	1	1	1	1	1	1	1	1	1	1	1	1	1	1	1	1	1	1	1	1	1	1	1	1	1	1	1	1	1	1
GC_00000526	1	1	1	0	1	1	1	1	1	1	1	1	1	1	1	1	1	1	1	1	1	1	1	1	1	1	1	1	1	1	1	1	1	1	1	1	1	1	1	1	1	1	1	1	1	1	1	1	1
GC_00000527	1	1	1	1	1	1	1	1	1	1	1	1	1	1	1	1	1	1	1	1	1	1	1	1	1	1	1	1	1	1	1	1	1	1	1	1	1	1	1	1	1	1	1	1	1	1	1	1	1
GC_00000528	1	1	1	1	1	1	1	1	1	1	1	1	1	1	1	1	1	1	1	1	1	1	1	1	1	1	1	1	1	1	1	1	1	1	1	1	1	1	1	1	1	1	1	1	1	1	1	1	1
GC_00000529	1	1	1	1	1	1	1	1	1	1	1	1	1	1	1	1	1	1	1	1	1	1	1	1	1	1	1	1	1	1	1	1	1	1	1	1	1	1	1	1	1	1	1	1	1	1	1	1	1
GC_00000530	1	1	1	1	1	1	1	1	1	1	1	1	1	1	1	1	1	1	1	1	1	1	1	1	1	1	1	1	1	1	1	1	1	1	1	1	1	1	1	1	1	1	1	1	1	1	1	1	1
GC_00000531	1	1	1	1	1	1	1	1	1	1	1	1	1	1	1	1	1	1	1	1	1	1	1	1	1	1	1	1	1	1	1	1	1	1	1	1	1	1	1	1	1	1	1	1	1	1	1	1	1
GC_00000532	1	1	1	1	1	1	1	1	1	1	1	1	1	1	1	1	1	1	1	1	1	1	1	1	1	1	1	1	1	1	1	1	1	1	1	1	1	1	1	1	1	1	1	1	1	1	1	1	1
GC_00000533	1	1	1	1	1	1	1	1	1	1	1	1	1	1	1	1	1	1	1	1	1	1	1	1	1	1	1	1	1	1	1	1	1	1	1	1	1	1	1	1	1	1	1	1	1	1	1	1	1
GC_00000534	1	1	1	1	1	1	1	1	1	1	1	1	1	1	1	1	1	1	1	1	1	1	1	1	1	1	1	1	1	1	1	1	1	1	1	1	1	1	1	1	1	1	1	1	1	1	1	1	1
GC_00000535	1	1	1	1	1	1	1	1	1	1	1	1	1	1	1	1	1	1	1	1	1	1	1	1	1	1	1	1	1	1	1	1	1	1	1	1	1	1	1	1	1	1	1	1	1	1	1	1	1
GC_00000536	1	1	1	1	1	1	1	1	1	1	1	1	1	1	1	1	1	1	1	1	1	1	1	1	1	1	1	1	1	1	1	1	1	1	1	1	1	1	1	1	1	1	1	1	1	1	1	1	1
GC_00000537	1	1	1	1	1	1	1	1	1	1	1	1	1	1	1	1	1	1	1	1	1	1	1	1	1	1	1	1	1	1	1	1	1	1	1	1	1	1	1	1	1	1	1	1	1	1	1	1	1
GC_00000538	1	1	1	1	1	1	1	1	1	1	1	1	1	1	1	1	1	1	1	1	1	1	1	1	1	1	1	1	1	1	1	1	1	1	1	1	1	1	1	1	1	1	1	1	1	1	1	1	1
GC_00000539	1	1	1	1	1	1	1	1	1	1	1	1	1	1	1	1	1	1	1	1	1	1	1	1	1	1	1	1	1	1	1	1	1	0	1	1	1	1	1	1	1	1	1	1	1	1	1	1	1
GC_00000540	1	1	1	1	1	1	1	1	1	1	1	1	1	1	1	1	1	1	1	1	1	1	1	1	1	1	1	1	1	1	1	1	1	1	1	1	1	1	1	1	1	1	1	1	1	1	1	1	1
GC_00000541	1	1	1	1	1	1	1	1	1	1	1	1	1	1	1	1	1	1	1	1	1	1	1	1	1	1	1	1	1	1	1	1	1	1	1	1	1	1	1	1	1	1	1	1	1	1	1	1	1
GC_00000542	1	1	1	1	1	1	1	1	1	1	1	1	1	1	1	1	1	1	1	1	1	1	1	1	1	1	1	1	1	1	1	1	1	1	1	1	1	1	1	1	1	1	1	1	1	1	1	1	1
GC_00000543	1	1	1	1	1	1	1	1	1	1	1	1	1	1	1	1	1	1	1	1	1	1	1	1	1	1	1	1	1	1	1	1	1	1	1	1	1	1	1	1	1	1	1	1	1	1	1	1	1
GC_00000544	1	1	1	1	1	1	1	1	1	1	1	1	1	1	1	1	1	1	1	1	1	1	1	1	1	1	1	1	1	1	1	1	1	1	1	1	1	1	1	1	1	1	1	1	1	1	1	1	1
GC_00000545	1	1	1	1	1	1	1	1	1	1	1	1	1	1	1	1	1	1	1	1	1	1	1	1	1	1	1	1	1	1	1	1	1	1	1	1	1	1	1	1	1	1	1	1	1	1	1	1	1
GC_00000546	1	1	1	1	1	1	1	1	1	1	1	1	1	1	1	1	1	1	1	1	1	1	1	1	1	1	1	1	1	1	1	1	1	1	1	1	1	1	1	1	1	1	1	1	1	1	1	1	1
GC_00000547	1	1	1	1	1	1	1	1	1	1	1	1	1	1	1	1	1	1	1	1	1	1	1	1	1	1	1	1	1	1	1	1	1	1	1	1	1	1	1	1	1	1	1	1	1	1	1	1	1
GC_00000548	1	1	1	1	1	1	1	1	1	1	1	1	1	1	1	1	1	1	1	1	1	1	1	1	1	1	1	1	1	1	1	1	1	1	1	1	1	1	1	1	1	1	1	1	1	1	1	1	1
GC_00000549	1	1	1	1	1	1	1	1	1	1	1	1	1	1	1	1	1	1	1	1	1	1	1	1	1	1	1	1	1	1	1	1	1	1	1	1	1	1	1	1	1	1	1	1	1	1	1	1	1
GC_00000550	1	1	1	1	1	1	1	1	1	1	1	1	1	1	1	1	1	1	1	1	1	1	1	1	1	1	1	1	1	1	1	1	1	1	1	1	1	1	1	1	1	1	1	1	1	1	1	1	1
GC_00000551	1	0	1	1	1	1	1	1	1	1	1	1	1	1	1	1	1	1	1	1	1	1	1	1	1	1	1	1	1	1	1	1	1	1	1	1	1	1	1	1	1	1	1	1	1	1	1	1	1
GC_00000552	1	1	1	1	1	1	1	1	1	1	1	1	1	1	1	1	1	1	1	1	1	1	1	1	1	1	1	1	1	1	1	1	1	1	1	1	1	1	1	1	1	1	1	1	1	1	1	1	1
GC_00000553	1	1	1	1	1	1	1	1	1	1	1	1	1	1	1	1	1	1	1	1	1	1	1	1	1	1	1	1	1	1	1	1	1	1	1	1	1	1	1	1	1	1	1	1	1	1	1	1	1
GC_00000554	1	1	1	1	1	1	0	1	1	1	1	1	1	1	1	1	1	1	1	1	1	1	1	1	1	1	1	1	1	1	1	1	1	1	1	1	1	1	1	1	1	1	1	1	1	1	1	1	1
GC_00000555	1	1	1	1	1	1	1	1	1	1	1	1	1	1	1	1	1	1	1	1	1	1	1	1	1	1	1	1	1	1	1	1	1	1	1	1	1	1	1	1	1	1	1	1	1	1	1	1	1
GC_00000556	1	1	1	1	1	1	1	1	1	1	1	1	1	1	1	1	1	1	1	1	1	1	1	1	1	1	1	1	1	1	1	1	1	1	1	1	1	1	1	1	1	1	1	1	1	1	1	1	1
GC_00000557	1	1	1	1	1	1	1	1	1	1	1	1	1	1	1	1	1	1	1	1	1	1	1	1	1	1	1	1	1	1	1	1	1	1	1	1	1	1	1	1	1	1	1	1	1	1	1	1	1
GC_00000558	1	1	1	1	1	1	1	1	1	1	1	1	1	1	1	1	1	0	1	1	1	1	1	1	1	1	1	1	1	1	1	1	1	1	1	1	1	1	1	1	1	1	1	1	1	1	1	1	1
GC_00000559	1	1	1	1	1	1	1	1	1	1	1	1	1	1	1	1	1	1	1	1	1	1	1	1	1	1	1	1	1	1	1	1	1	1	1	1	1	1	1	1	1	1	1	1	1	1	1	1	1
GC_00000560	1	1	1	1	1	1	1	1	1	1	1	1	1	1	1	1	1	1	1	1	1	1	1	1	1	1	1	1	1	1	1	1	1	1	1	1	1	1	1	1	1	1	1	1	1	1	1	1	1
GC_00000561	1	1	1	1	1	1	1	1	1	1	1	1	1	1	1	1	1	1	1	1	1	1	1	1	1	1	1	1	1	1	1	1	1	1	1	1	1	1	1	1	1	1	1	1	1	1	1	1	1
GC_00000562	1	0	1	1	1	1	1	1	1	1	1	1	1	1	1	1	1	1	1	1	1	1	1	1	1	1	1	1	1	1	1	1	1	1	1	1	1	1	1	1	1	1	1	1	1	1	1	1	1
GC_00000563	1	1	1	1	1	1	1	1	1	1	1	1	1	1	1	1	1	1	1	1	1	1	1	1	1	1	1	1	1	1	1	1	1	1	1	1	1	1	1	1	1	1	1	1	1	1	1	1	1
GC_00000564	1	1	1	1	1	1	0	1	1	1	1	1	0	1	1	1	1	1	1	1	1	1	1	1	1	1	1	1	1	1	1	1	1	1	1	1	1	1	1	1	1	1	1	1	1	1	1	1	1
GC_00000565	1	1	1	1	1	1	0	1	1	1	1	1	1	1	1	1	1	1	1	1	1	1	1	1	1	1	1	1	1	1	1	1	1	1	1	1	1	1	1	1	1	1	1	1	1	1	1	1	1
GC_00000566	1	1	1	1	1	1	1	1	1	1	1	1	1	1	1	1	1	1	1	1	1	1	1	1	1	1	1	1	1	1	1	1	1	1	1	1	1	1	1	1	1	1	1	1	1	1	1	1	1
GC_00000567	1	1	1	1	1	1	1	1	1	1	1	1	1	1	1	1	1	1	1	1	1	1	1	1	1	1	1	1	1	1	1	1	1	1	1	1	1	1	1	1	1	1	1	1	1	1	1	1	1
GC_00000568	1	1	1	1	1	1	1	1	1	1	1	1	1	1	1	1	1	1	1	1	1	1	1	1	1	1	1	1	1	1	1	1	1	1	1	1	1	1	1	1	1	1	1	1	1	1	1	1	1
GC_00000569	1	1	1	1	1	1	1	1	1	1	1	1	1	1	1	1	1	1	1	1	1	1	1	1	1	1	1	1	1	1	1	1	1	1	1	1	1	1	1	1	1	1	1	1	1	1	1	1	1
GC_00000570	1	0	1	1	1	1	1	1	1	1	1	1	1	1	1	1	1	1	1	1	1	1	1	1	1	1	1	1	1	1	1	1	1	1	1	1	1	1	1	1	1	1	1	1	1	1	1	1	1
GC_00000571	1	1	1	1	1	1	1	1	1	1	1	1	1	1	1	1	1	1	1	1	1	1	1	1	1	1	1	1	1	1	1	1	1	1	1	1	1	1	1	1	1	1	1	1	1	1	1	1	1
GC_00000572	1	1	1	1	1	1	1	1	1	1	1	1	1	1	1	1	1	1	1	1	1	1	1	1	1	1	1	1	1	1	1	1	1	1	1	1	1	1	1	1	1	1	1	0	1	1	1	1	1
GC_00000573	1	1	1	0	0	1	1	1	1	1	1	1	1	1	1	1	1	1	1	1	1	1	1	1	1	1	1	1	1	1	1	1	1	1	1	1	1	1	1	1	1	1	1	1	1	1	1	1	1
GC_00000574	1	1	1	1	0	1	1	1	1	1	1	1	1	1	1	1	1	1	1	1	1	1	1	1	1	1	1	1	1	1	1	1	1	1	1	1	1	1	1	1	1	1	1	1	1	1	1	1	1
GC_00000575	1	0	1	1	1	1	1	1	1	1	1	1	1	1	1	1	1	1	1	1	1	1	1	1	1	1	1	1	1	1	1	1	1	1	1	1	1	1	1	1	1	1	1	1	1	1	1	1	1
GC_00000576	1	1	1	1	1	1	1	1	1	1	1	1	1	1	1	1	1	1	1	1	1	1	1	1	1	1	1	1	1	1	1	1	1	1	1	1	1	1	1	1	1	1	1	1	1	1	1	1	1
GC_00000577	1	1	1	1	1	1	1	1	1	1	1	1	1	1	1	1	1	1	1	1	1	1	1	1	1	1	1	1	1	1	1	1	1	1	1	1	1	1	1	1	1	1	1	1	1	1	1	1	1
GC_00000578	1	1	1	1	1	1	1	1	1	1	1	1	1	1	1	1	1	1	1	1	1	1	1	1	1	1	1	1	1	1	1	1	1	1	1	1	1	1	1	1	1	1	1	1	1	1	1	1	1
GC_00000579	1	1	1	1	1	1	1	1	1	1	1	1	1	1	1	1	1	1	1	1	1	1	1	1	1	1	1	1	1	1	1	1	1	1	1	1	1	1	1	1	1	1	1	1	1	1	1	1	1
GC_00000580	1	1	1	1	1	1	1	1	1	1	1	1	1	1	1	1	1	1	1	1	1	1	1	1	1	1	1	1	1	1	1	1	1	1	1	1	1	1	1	1	1	1	1	1	1	1	1	1	1
GC_00000581	1	1	1	1	1	1	1	1	1	1	1	1	1	1	1	1	1	1	1	1	1	1	1	1	1	1	1	1	1	1	1	1	1	1	1	1	1	1	1	1	1	1	1	1	1	1	1	1	1
GC_00000582	1	1	1	1	1	1	1	0	1	1	1	1	1	1	1	1	1	1	1	1	1	1	1	1	1	1	1	1	1	1	1	1	1	1	1	1	1	1	1	1	1	1	1	1	1	1	1	1	1
GC_00000583	1	1	1	1	1	1	0	1	1	1	1	1	1	1	1	1	1	1	1	1	1	1	1	1	1	1	1	1	1	1	1	1	1	1	1	1	1	1	1	1	1	1	1	1	1	1	1	1	1
GC_00000584	1	1	1	1	1	1	1	1	1	1	1	1	1	1	1	1	1	1	1	1	1	1	1	1	1	1	1	1	1	1	1	1	1	1	1	1	1	1	1	1	1	1	1	1	1	1	1	1	1
GC_00000585	1	1	1	0	1	1	1	1	1	1	1	1	1	1	1	1	1	1	1	1	1	1	1	1	1	1	1	1	1	1	1	1	1	1	1	1	1	1	1	1	1	1	1	1	1	1	1	1	1
GC_00000586	1	1	1	1	1	1	1	1	1	1	1	1	1	1	1	1	1	1	1	1	1	1	1	1	1	1	1	1	1	1	1	1	1	1	1	1	1	1	1	1	1	1	1	1	1	1	1	1	1
GC_00000587	0	0	0	1	0	0	1	1	1	0	0	0	1	1	1	1	1	0	1	0	1	1	0	1	1	1	1	1	1	1	1	1	1	0	1	0	0	0	0	0	0	0	0	1	1	1	1	1	1
GC_00000588	1	1	1	1	0	1	1	1	1	1	1	1	1	1	1	1	1	1	1	1	1	1	1	1	1	1	1	1	1	1	1	1	1	1	1	1	1	1	1	1	1	1	1	1	1	1	1	1	1
GC_00000589	1	1	1	1	1	1	1	1	1	1	1	1	1	1	1	1	1	1	1	1	1	1	1	1	1	1	1	1	1	1	1	1	1	1	1	1	1	1	1	1	1	1	1	1	1	1	1	1	1
GC_00000590	1	1	1	1	1	1	1	1	1	1	1	1	1	1	1	1	1	1	1	1	1	1	1	1	1	1	1	1	1	1	1	1	1	1	1	1	1	1	1	1	1	1	1	1	1	1	1	1	1
GC_00000591	1	1	1	1	0	1	1	1	1	1	1	1	1	1	1	1	1	1	1	1	1	1	1	1	1	1	1	1	1	1	1	1	1	1	1	1	1	1	1	1	1	1	1	1	1	1	1	1	1
GC_00000592	1	1	1	1	1	1	1	1	1	1	1	1	1	1	1	1	1	1	1	1	1	1	1	1	1	1	1	1	1	1	1	1	1	1	1	1	1	1	1	1	1	1	1	1	1	1	1	1	1
GC_00000593	1	1	1	1	1	1	1	1	1	1	1	1	1	1	1	1	1	1	1	1	1	1	1	1	1	1	1	1	1	1	1	1	1	1	1	1	1	1	1	1	1	1	1	1	1	1	1	1	1
GC_00000594	1	1	1	1	1	1	1	1	1	1	1	1	1	1	1	1	1	1	1	1	1	1	1	1	1	1	1	1	1	1	1	1	1	1	1	1	1	1	1	1	1	1	1	1	1	1	1	1	1
GC_00000595	1	1	1	1	1	1	1	1	1	1	1	1	1	1	1	1	1	1	1	1	1	1	1	1	1	1	1	1	1	1	1	1	1	1	1	1	1	1	1	1	1	1	1	1	1	1	1	1	1
GC_00000596	1	1	1	1	0	1	0	1	1	1	1	1	1	1	1	1	1	1	1	1	1	1	1	1	1	1	1	1	1	1	1	1	1	1	1	1	1	1	1	1	1	1	1	1	1	1	1	1	1
GC_00000597	1	1	0	1	1	1	1	0	0	0	1	1	0	0	1	1	1	1	1	0	1	0	0	1	1	1	1	1	1	0	1	1	1	0	1	0	0	0	0	0	0	0	0	1	1	1	1	1	1
GC_00000598	1	1	1	1	1	1	0	0	1	1	1	1	1	1	1	1	1	1	1	1	1	1	1	1	1	1	1	1	1	1	1	1	1	1	1	1	1	1	1	1	1	1	1	1	1	1	1	1	1
GC_00000599	1	0	1	1	1	1	0	1	1	1	1	1	1	1	1	1	1	1	1	1	1	1	1	1	1	1	1	1	1	1	1	1	1	1	1	1	1	1	1	1	1	1	1	1	1	1	1	1	1
GC_00000600	1	1	1	1	1	1	1	1	1	1	1	1	1	1	1	1	1	1	1	1	1	1	1	1	1	1	1	1	1	1	1	1	1	1	1	1	1	1	1	1	1	1	1	1	1	1	1	1	1
GC_00000601	1	1	1	1	1	1	1	0	1	1	1	1	1	1	1	1	1	1	1	1	1	1	1	1	1	1	1	1	1	1	1	1	1	1	1	1	1	1	1	1	1	1	1	1	1	1	1	1	1
GC_00000602	1	1	1	1	1	1	1	1	1	1	1	1	1	1	1	1	1	1	1	1	1	1	1	1	1	1	1	1	1	1	1	1	1	1	1	1	1	1	1	1	1	1	1	1	1	1	1	1	1
GC_00000603	1	1	1	1	1	1	1	1	1	1	1	1	1	1	1	1	1	1	1	1	1	1	1	1	1	1	1	1	1	1	1	1	1	1	1	1	1	1	1	1	1	1	1	1	1	1	1	1	1
GC_00000604	1	0	1	1	1	1	1	0	1	1	1	1	1	1	1	1	1	1	1	1	1	1	1	1	1	1	1	1	1	1	1	1	1	1	1	1	1	1	1	1	1	1	1	1	1	1	1	1	1
GC_00000605	1	1	1	1	1	1	1	1	1	1	1	1	1	1	1	1	1	1	1	1	1	1	1	1	1	1	1	1	1	1	1	1	1	1	1	1	1	1	1	1	1	1	1	1	1	1	1	1	1
GC_00000606	1	1	1	1	1	1	1	1	1	1	1	1	1	1	1	1	1	1	1	1	1	1	1	1	1	1	1	1	1	1	1	1	1	1	1	1	1	1	1	1	1	1	1	1	1	1	1	1	1
GC_00000607	1	1	1	1	1	1	1	1	1	1	1	1	1	1	1	1	1	1	1	1	1	1	1	1	1	1	1	1	1	1	1	1	1	1	1	1	1	1	1	1	1	1	1	1	1	1	1	1	1
GC_00000608	1	1	1	1	1	1	1	1	1	1	1	1	1	1	1	1	1	1	1	1	1	1	1	1	1	1	1	1	1	1	1	1	1	1	1	1	1	1	1	1	1	1	1	1	1	1	1	1	1
GC_00000609	1	1	1	0	1	1	1	1	1	1	1	1	1	1	1	1	1	1	1	1	1	1	1	1	1	1	1	1	1	1	1	1	1	1	1	1	1	1	1	1	1	1	1	1	1	1	1	1	1
GC_00000610	1	1	1	1	1	1	1	1	1	1	1	1	1	1	1	1	1	1	1	1	1	1	1	1	1	1	1	1	1	1	1	1	1	1	1	1	1	1	1	1	1	1	1	1	1	1	1	1	1
GC_00000611	1	0	1	1	1	1	1	1	1	1	1	1	1	1	1	1	1	1	1	1	1	1	1	1	1	1	1	1	1	1	1	1	1	1	1	1	1	1	1	1	1	1	1	1	1	1	1	1	1
GC_00000612	1	1	1	1	1	1	1	1	1	1	1	1	1	1	1	1	1	1	1	1	1	1	1	1	1	1	1	1	1	1	1	1	1	1	1	1	1	1	1	1	1	1	1	1	1	1	1	1	1
GC_00000613	1	1	1	1	1	1	1	1	1	1	1	1	1	1	1	1	1	1	1	1	1	1	1	1	1	1	1	1	1	1	1	1	1	1	1	1	1	1	1	1	1	1	1	1	1	1	1	1	1
GC_00000614	1	1	1	1	1	1	1	0	1	1	1	1	1	1	1	1	1	1	1	1	1	1	1	1	1	1	1	1	1	1	1	1	1	1	1	1	1	1	1	1	1	1	1	1	1	1	1	1	1
GC_00000615	1	1	1	1	1	1	1	1	1	1	1	1	1	1	1	1	1	1	1	1	1	1	1	1	1	1	1	1	1	1	1	1	1	1	1	1	1	1	1	1	1	1	1	1	1	1	1	1	1
GC_00000616	1	1	1	1	1	1	1	1	1	1	1	1	1	1	1	1	1	1	1	1	1	1	1	1	1	1	1	1	1	1	1	1	1	1	1	1	1	1	1	1	1	1	1	1	1	1	1	1	1
GC_00000617	1	1	1	1	1	1	0	1	1	1	1	1	1	1	1	1	1	1	1	1	1	1	1	1	1	1	1	1	1	1	1	1	1	1	1	1	1	1	1	1	1	1	1	1	1	1	1	1	1
GC_00000618	1	1	1	1	1	1	1	1	1	1	1	1	1	1	1	1	1	1	1	1	1	1	1	1	1	1	1	1	1	1	1	1	1	1	1	1	1	1	1	1	1	1	1	1	1	1	1	1	1
GC_00000619	1	1	1	1	0	1	1	1	1	1	1	1	1	1	1	1	1	1	1	1	1	1	1	1	1	1	1	1	1	1	1	1	1	1	1	1	1	1	1	1	1	1	1	1	1	1	1	1	1
GC_00000620	1	1	1	1	1	1	1	1	1	1	1	1	1	1	1	1	1	1	1	1	1	1	1	1	1	1	1	1	1	1	1	1	1	1	1	1	1	1	1	1	1	1	1	1	1	1	1	1	1
GC_00000621	1	1	1	1	1	1	1	1	1	1	1	1	1	1	1	1	1	1	1	1	1	1	1	1	1	1	1	1	1	1	1	1	1	1	1	1	1	1	1	1	1	1	1	1	1	1	1	1	1
GC_00000622	1	1	1	1	1	1	0	1	1	1	1	1	1	1	1	1	1	1	1	1	1	1	1	1	1	1	1	1	1	1	1	1	1	1	1	1	1	1	1	1	1	1	1	1	1	1	1	1	1
GC_00000623	1	1	1	1	1	1	1	1	1	1	1	1	1	1	1	1	1	1	1	1	1	1	1	1	1	1	1	1	1	1	1	1	1	1	1	1	1	1	1	1	1	1	1	1	1	1	1	1	1
GC_00000624	1	1	1	1	1	1	1	1	1	1	1	1	1	1	1	1	1	1	1	1	1	1	1	1	1	1	1	1	1	1	1	1	1	1	1	1	1	1	1	1	1	1	1	1	1	1	1	1	1
GC_00000625	1	1	1	1	1	1	0	1	1	1	1	1	1	1	1	1	1	1	1	1	1	1	1	1	1	1	1	1	1	1	1	1	1	1	1	1	1	1	1	1	1	1	1	1	1	1	1	1	1
GC_00000626	1	0	1	1	1	1	1	1	1	1	1	1	1	1	1	1	1	1	1	1	1	1	1	1	1	1	1	1	1	1	1	1	1	1	1	1	1	1	1	1	1	1	1	1	1	1	1	1	1
GC_00000627	1	1	1	1	1	1	1	1	1	1	1	1	1	1	1	1	1	1	1	1	1	1	1	1	1	1	1	1	1	1	1	1	1	1	1	1	1	1	1	1	1	1	1	1	1	1	1	1	1
GC_00000628	1	1	1	0	1	1	1	1	1	1	1	1	1	1	1	1	1	1	1	1	1	1	1	1	1	1	1	1	1	1	1	1	1	1	1	1	1	1	1	1	1	1	1	1	1	1	1	1	1
GC_00000629	1	1	1	0	1	1	1	1	1	1	1	1	1	1	1	1	1	1	1	1	1	1	1	1	1	1	1	1	1	1	1	1	1	1	1	1	1	1	1	1	1	1	1	1	1	1	1	1	1
GC_00000630	1	1	1	1	1	1	1	1	1	1	1	1	1	1	1	1	1	1	1	1	1	1	1	1	1	1	1	1	1	1	1	1	1	1	1	1	1	1	1	1	1	1	1	1	1	1	1	1	1
GC_00000631	1	1	1	0	0	1	1	1	1	1	1	1	1	1	1	1	1	1	1	1	1	1	1	1	1	1	1	1	1	1	1	1	1	1	1	1	1	1	1	1	1	1	1	1	1	1	1	1	1
GC_00000632	1	0	1	1	1	1	1	1	1	1	1	1	1	1	1	1	1	1	1	1	1	1	1	1	1	1	1	1	1	1	1	1	1	1	1	1	1	1	1	1	1	1	1	1	1	1	1	1	1
GC_00000633	1	1	1	1	1	1	1	1	1	1	1	1	1	1	1	1	1	1	1	1	1	1	1	1	1	1	1	1	1	1	1	1	1	1	1	1	1	1	1	1	1	1	1	1	1	1	1	1	1
GC_00000634	1	1	1	1	0	1	1	1	1	1	1	1	1	1	1	1	1	1	1	1	1	1	1	1	1	1	1	1	1	1	1	1	1	1	1	1	1	1	1	1	1	1	1	1	1	1	1	1	1
GC_00000635	1	1	1	1	1	1	1	1	1	1	1	1	1	1	1	1	1	1	1	1	1	1	1	1	1	1	1	1	1	1	1	1	1	1	1	1	1	1	1	1	1	1	1	1	1	1	1	1	1
GC_00000636	1	1	1	1	1	1	1	1	1	1	1	1	1	1	1	1	1	1	1	1	1	1	1	1	1	1	1	1	1	1	1	1	1	1	1	1	1	1	1	1	1	1	1	1	1	1	1	1	1
GC_00000637	1	1	1	1	1	1	1	0	1	1	1	1	1	1	1	1	1	1	1	1	1	1	1	1	1	1	1	1	1	1	1	1	1	1	1	1	1	1	1	1	1	1	1	1	1	1	1	1	1
GC_00000638	1	0	1	1	1	1	1	1	1	1	1	1	1	1	1	1	1	1	1	1	1	1	1	1	1	1	1	1	1	1	1	1	1	1	1	1	1	1	1	1	1	1	1	1	1	1	1	1	1
GC_00000639	1	1	1	1	1	1	1	1	1	1	1	1	1	1	1	1	1	1	1	1	1	1	1	1	1	1	1	1	1	1	1	1	1	1	1	1	1	1	1	1	1	1	1	1	1	1	1	1	1
GC_00000640	1	1	1	1	1	1	1	1	1	1	1	1	1	1	1	1	1	1	1	1	1	1	1	1	1	1	1	1	1	1	1	1	1	1	1	1	1	1	1	1	1	1	1	1	1	1	1	1	1
GC_00000641	1	1	1	1	1	1	1	1	1	1	1	1	1	1	1	1	1	1	1	1	1	1	1	1	1	1	1	1	1	1	1	1	1	1	1	1	1	1	1	1	1	1	1	1	1	1	1	1	1
GC_00000642	1	1	1	1	1	1	1	1	1	1	1	1	1	1	1	1	1	1	1	1	1	1	1	1	1	1	1	1	1	1	1	1	1	1	1	1	1	1	1	1	1	1	1	1	1	1	1	1	1
GC_00000643	1	1	1	1	0	1	1	1	1	1	1	1	1	1	1	1	1	1	1	1	1	1	1	1	1	1	1	1	1	1	1	1	1	1	1	1	1	1	1	1	1	1	1	1	1	1	1	1	1
GC_00000644	1	1	1	1	1	1	1	1	1	1	1	1	1	1	1	1	1	1	1	1	1	1	1	1	1	1	1	1	1	1	1	1	1	1	1	1	1	1	1	1	1	1	1	1	1	1	1	1	1
GC_00000645	1	1	1	1	1	1	1	1	1	1	1	1	1	1	1	1	1	1	1	1	1	1	1	1	1	1	1	1	1	1	1	1	1	1	1	1	1	1	1	1	1	1	1	1	1	1	1	1	1
GC_00000646	1	1	1	1	0	1	1	1	1	1	1	1	1	1	1	1	1	1	1	1	1	1	1	1	1	1	1	1	1	1	1	1	1	1	1	1	1	1	1	1	1	1	1	1	1	1	1	1	1
GC_00000647	1	0	1	1	1	1	1	1	1	1	1	1	1	1	1	1	1	1	1	1	1	1	1	1	1	1	1	1	1	1	1	1	1	1	1	1	1	1	1	1	1	1	1	1	1	1	1	1	1
GC_00000648	1	1	1	1	1	1	1	1	1	1	1	1	1	1	1	1	1	1	1	1	1	0	1	1	1	1	1	1	1	1	1	1	1	1	1	1	1	1	1	1	1	1	1	1	1	1	1	1	1
GC_00000649	1	0	1	1	1	1	1	0	1	1	1	1	1	1	1	1	1	1	1	1	1	1	1	1	1	1	1	1	1	1	1	1	1	1	1	1	1	1	1	1	1	1	1	1	1	1	1	1	1
GC_00000650	1	1	1	1	1	1	1	1	1	1	1	1	1	1	1	1	1	1	1	1	1	1	1	1	1	1	1	1	1	1	1	1	1	1	1	1	1	1	1	1	1	1	1	1	1	1	1	1	1
GC_00000651	1	1	1	0	1	1	1	1	1	1	1	1	1	1	1	1	1	1	1	1	1	1	1	1	1	1	1	1	1	1	1	1	1	1	1	1	1	1	1	1	1	1	1	1	1	1	1	1	1
GC_00000652	1	1	1	1	1	1	1	1	1	1	1	1	1	1	1	1	1	1	1	1	1	0	1	1	1	1	1	1	1	1	1	1	1	1	1	1	1	1	1	1	1	1	1	1	1	1	1	1	1
GC_00000653	0	1	1	1	1	1	1	1	1	1	1	1	1	1	1	1	1	1	1	1	1	1	1	1	1	1	1	1	1	1	1	1	1	1	1	1	1	1	1	1	1	1	1	1	1	1	1	1	1
GC_00000654	1	1	1	1	1	1	1	1	1	1	1	1	1	1	1	1	1	1	1	1	1	1	1	1	1	1	1	1	1	1	1	1	1	1	1	1	1	1	1	1	1	1	1	1	1	1	1	1	1
GC_00000655	1	1	1	1	1	1	1	1	1	1	1	1	1	1	1	1	1	1	1	1	1	1	1	1	1	1	1	1	1	1	1	1	1	1	1	1	1	1	1	1	1	1	1	1	1	1	1	1	1
GC_00000656	1	1	1	1	1	1	1	1	1	1	1	1	1	1	1	1	1	1	1	1	1	1	1	1	1	1	1	1	1	1	1	1	1	1	1	1	1	1	1	1	1	1	1	1	1	1	1	1	1
GC_00000657	1	1	1	1	1	1	1	1	1	1	1	1	1	1	1	1	1	1	1	1	1	1	1	1	1	1	1	1	1	1	1	1	1	1	1	1	1	1	1	1	1	1	1	1	1	1	1	1	1
GC_00000658	1	1	1	1	1	1	1	1	1	1	1	1	1	1	1	1	1	1	1	1	1	1	1	1	1	1	1	1	1	1	1	1	1	1	1	1	1	1	1	1	1	1	1	1	1	1	1	1	1
GC_00000659	0	0	0	0	0	0	0	0	1	0	1	0	0	1	1	1	1	0	1	0	1	1	0	1	1	1	1	1	0	1	1	1	1	0	1	0	0	0	0	0	0	0	0	1	1	1	1	1	1
GC_00000660	1	1	1	1	1	1	1	1	1	1	1	1	1	1	1	1	1	1	1	1	1	1	1	1	1	1	1	1	1	1	1	1	1	1	1	1	1	1	1	1	1	1	1	1	1	1	1	1	1
GC_00000661	1	1	1	1	1	1	1	0	1	0	1	1	0	1	1	0	1	1	1	0	1	1	0	1	1	1	1	1	1	1	1	1	1	0	0	0	0	0	0	0	0	0	0	1	1	1	1	1	1
GC_00000662	1	1	1	1	0	1	1	1	1	1	1	1	1	1	1	1	1	1	1	1	1	1	1	1	1	1	1	1	1	1	1	1	1	1	1	1	1	1	1	1	1	1	1	1	1	1	1	1	1
GC_00000663	1	1	1	1	1	1	1	1	1	1	1	1	1	1	1	1	1	1	1	1	1	1	1	1	1	1	1	1	1	1	1	1	1	1	1	1	1	1	1	1	1	1	1	1	1	1	1	1	1
GC_00000664	1	1	1	1	0	1	1	0	1	1	1	1	1	1	1	1	1	1	1	1	1	1	1	1	1	1	1	1	1	1	1	1	1	1	1	1	1	1	1	1	1	1	1	1	1	1	1	1	1
GC_00000665	1	1	1	1	1	1	1	1	1	1	1	1	1	1	1	1	1	1	1	1	1	1	1	1	1	1	1	1	1	1	1	1	1	1	1	1	1	1	1	1	1	1	1	1	1	1	1	1	1
GC_00000666	1	1	1	1	0	1	1	1	1	1	1	1	1	1	1	1	1	1	1	1	1	1	1	1	1	1	1	1	1	1	1	1	1	0	1	1	1	1	1	1	1	1	1	1	1	1	1	1	1
GC_00000667	1	1	1	1	1	1	1	1	1	1	1	1	1	1	1	1	1	1	1	1	1	1	1	1	1	1	1	1	1	1	1	1	1	1	1	1	1	1	1	1	1	1	1	1	1	1	1	1	1
GC_00000668	1	1	1	1	1	1	1	1	1	1	1	1	1	1	1	1	1	1	1	1	1	1	1	1	1	1	1	1	1	1	1	1	1	1	1	1	1	1	1	1	1	1	1	1	1	1	1	1	1
GC_00000669	1	1	1	0	1	1	1	1	1	1	1	1	1	1	1	1	1	1	1	1	1	1	1	1	1	1	1	1	1	1	1	1	1	1	1	1	1	1	1	1	1	1	1	1	1	1	1	1	1
GC_00000670	1	1	1	1	0	1	1	1	1	1	1	1	1	1	1	1	1	1	1	1	1	1	1	1	1	1	1	1	1	1	1	1	1	1	1	1	1	1	1	1	1	1	1	1	1	1	1	1	1
GC_00000671	1	1	1	1	0	1	1	1	1	1	1	1	1	1	1	1	1	1	1	1	1	1	1	1	1	1	1	1	1	1	1	1	1	1	1	1	1	1	1	1	1	1	1	1	1	1	1	1	1
GC_00000672	1	1	0	0	0	1	1	1	1	0	1	1	1	1	1	1	1	1	0	0	1	1	0	1	1	1	1	1	1	1	1	1	1	0	1	0	0	0	0	0	0	0	0	1	1	1	1	1	1
GC_00000673	1	1	1	1	1	1	1	1	1	1	1	1	1	1	1	1	1	1	1	1	1	1	1	1	1	1	1	1	1	1	1	1	1	1	1	1	1	1	1	1	1	1	1	1	1	1	1	1	1
GC_00000674	1	1	1	1	1	1	1	1	1	0	1	1	1	1	1	1	1	1	1	1	1	1	1	1	1	1	1	1	1	1	1	1	1	1	1	1	1	1	1	1	1	0	0	1	1	1	1	1	1
GC_00000675	1	1	1	1	1	1	1	1	1	1	1	1	1	1	1	1	1	1	1	1	1	1	1	1	1	1	1	1	1	1	1	1	1	1	1	1	1	1	1	1	1	1	1	1	1	1	1	1	1
GC_00000676	1	1	1	1	1	1	1	1	1	1	1	1	1	1	1	1	1	1	1	1	1	1	1	1	1	1	1	1	1	1	1	1	1	1	1	1	1	1	1	1	1	1	1	1	1	1	1	1	1
GC_00000677	1	1	1	1	1	1	1	1	1	1	1	1	1	1	1	1	1	1	1	1	1	1	1	1	1	1	1	1	1	1	1	1	1	1	1	1	1	1	1	1	1	1	1	1	1	1	1	1	1
GC_00000678	1	1	1	1	1	1	1	1	1	1	1	1	1	1	1	1	1	1	1	1	1	1	1	1	1	1	1	1	1	1	1	1	1	1	1	1	1	1	1	1	1	1	1	1	1	1	1	1	1
GC_00000679	1	1	1	1	1	1	1	1	1	1	1	1	1	1	1	1	1	1	1	1	1	1	1	1	1	1	1	1	1	1	1	1	1	1	1	1	1	1	1	1	1	1	1	1	1	1	1	1	1
GC_00000680	1	1	1	1	1	1	1	1	1	1	1	1	1	1	1	1	1	1	1	1	1	1	1	1	1	1	1	1	1	1	1	1	1	1	1	1	1	1	1	1	1	1	1	1	1	1	1	1	1
GC_00000681	0	1	1	1	1	1	1	1	1	1	1	1	1	1	1	1	1	1	1	1	1	1	1	1	1	1	1	1	1	1	1	1	1	1	1	1	1	1	1	1	1	1	1	1	1	1	1	1	1
GC_00000682	1	1	1	1	1	1	0	1	1	1	1	1	1	1	1	1	1	1	1	1	1	1	1	1	1	1	1	1	1	1	1	1	1	1	1	1	1	1	1	1	1	1	1	1	1	1	1	1	1
GC_00000683	1	1	1	1	1	1	1	1	1	1	1	1	1	1	1	1	1	1	1	1	1	1	1	1	1	1	1	1	1	1	1	1	1	1	1	1	1	1	1	1	1	1	1	1	1	1	1	1	1
GC_00000684	1	1	1	1	1	1	0	1	1	1	1	1	1	1	1	1	1	1	1	1	1	1	1	1	1	1	1	1	1	1	1	1	1	1	1	1	1	1	1	1	1	1	1	1	1	1	1	1	1
GC_00000685	1	1	1	1	1	1	1	1	1	1	1	1	1	1	1	1	1	1	1	1	1	1	1	1	1	1	1	1	1	1	1	1	1	1	1	1	1	1	1	1	1	1	1	1	1	1	1	1	1
GC_00000686	1	1	1	1	1	1	1	1	1	1	1	1	1	1	1	1	1	1	1	1	1	1	1	1	1	1	1	1	1	1	1	1	1	1	1	1	1	1	1	1	1	1	1	1	1	1	1	1	1
GC_00000687	1	1	1	0	1	1	1	1	1	1	1	1	1	1	1	1	1	1	1	1	1	1	1	1	1	1	1	1	1	1	1	1	1	1	1	1	1	1	1	1	1	1	1	1	1	1	1	1	1
GC_00000688	1	1	1	1	1	1	1	1	1	1	1	1	1	1	1	1	1	1	1	1	1	1	1	1	1	1	1	1	1	1	1	1	1	1	1	1	1	1	1	1	1	1	1	1	1	1	1	1	1
GC_00000689	1	1	1	1	1	1	1	1	1	1	1	1	1	1	1	1	1	1	1	1	1	0	1	1	1	1	1	1	1	1	1	1	1	1	1	1	1	1	1	1	1	1	1	1	1	1	1	1	1
GC_00000690	1	1	1	1	1	1	0	1	1	1	1	1	1	1	1	1	1	1	1	1	1	1	1	1	1	1	1	1	1	1	1	1	1	1	1	1	1	1	1	1	1	1	1	1	1	1	1	1	1
GC_00000691	1	1	1	1	0	1	1	1	1	1	1	1	1	1	1	1	1	1	1	1	1	1	1	1	1	1	1	1	1	1	1	1	1	1	1	1	1	1	1	1	1	1	1	1	1	1	1	1	1
GC_00000692	1	1	1	1	1	1	1	1	1	1	1	1	1	1	1	1	1	1	1	1	1	1	1	1	1	1	1	1	1	1	1	1	1	1	1	1	1	1	1	1	1	1	1	1	1	1	1	1	1
GC_00000693	1	1	1	1	1	1	1	1	1	1	1	1	1	1	1	1	1	1	1	1	1	1	1	1	1	1	1	1	1	1	1	1	1	1	1	1	1	1	1	1	1	1	1	1	1	1	1	1	1
GC_00000694	1	1	1	1	1	1	1	1	1	1	1	1	1	1	1	1	1	1	1	1	1	1	1	1	1	1	1	1	1	1	1	1	1	1	1	1	1	1	1	1	1	1	1	1	1	1	1	1	1
GC_00000695	1	1	1	1	1	1	1	1	1	1	1	1	1	1	1	1	1	1	1	1	1	1	1	1	1	1	1	1	1	1	1	1	1	1	1	1	1	1	1	1	1	1	1	1	1	1	1	1	1
GC_00000696	1	1	1	1	1	1	1	1	1	1	1	1	1	1	1	1	1	1	1	1	1	1	1	1	1	1	1	1	1	1	1	1	1	1	1	1	1	1	1	1	1	1	1	1	1	1	1	1	1
GC_00000697	1	1	1	1	1	1	1	1	1	1	1	1	1	1	1	1	1	1	1	1	1	1	1	1	1	1	1	1	1	1	1	1	1	1	1	1	1	1	1	1	1	1	1	1	1	1	1	1	1
GC_00000698	1	1	1	1	1	1	1	1	1	1	1	1	1	1	1	1	1	1	1	1	1	1	1	1	1	1	1	1	1	1	1	1	1	1	1	1	1	1	1	1	1	1	1	1	1	1	1	1	1
GC_00000699	1	0	1	1	1	1	0	1	1	1	1	1	1	1	1	1	1	1	1	1	1	1	1	1	1	1	1	1	1	1	1	1	1	1	1	1	1	1	1	1	1	1	1	1	1	1	1	1	1
GC_00000700	1	1	1	1	1	1	1	1	1	1	1	1	1	1	1	1	1	1	1	1	1	1	1	1	1	1	1	1	1	1	1	1	1	0	1	1	1	1	1	1	1	1	1	1	1	1	1	1	1
GC_00000701	1	1	1	1	1	1	1	1	1	1	1	1	1	1	1	1	1	1	1	1	1	1	1	1	1	1	1	1	1	1	1	1	1	1	1	1	1	1	1	1	1	1	1	1	1	1	1	1	1
GC_00000702	1	1	1	1	1	1	1	1	1	1	1	1	1	1	1	1	1	1	1	1	1	1	1	1	1	1	1	1	1	1	1	1	1	1	1	1	1	1	1	1	1	1	1	1	1	1	1	1	1
GC_00000703	1	1	1	1	1	1	1	1	1	1	1	1	1	1	1	1	1	1	1	1	1	1	1	1	1	1	1	1	1	1	1	1	1	1	1	1	1	1	1	1	1	1	1	1	1	1	1	1	1
GC_00000704	1	1	1	1	0	1	1	1	1	1	1	1	1	1	1	1	1	1	1	1	1	1	1	1	1	1	1	1	1	1	1	1	1	1	1	1	1	1	1	1	1	1	1	1	1	1	1	1	1
GC_00000705	1	1	1	1	1	1	1	1	1	1	1	1	1	1	1	1	1	1	1	1	1	1	1	1	1	1	1	1	1	1	1	1	1	1	1	1	1	1	1	1	1	1	1	1	1	1	1	1	1
GC_00000706	1	1	1	1	1	1	1	1	1	1	1	1	1	1	1	1	1	1	1	1	1	1	1	1	1	1	1	1	1	1	1	1	1	1	1	1	1	1	1	1	1	1	1	1	1	1	1	1	1
GC_00000707	1	1	1	1	1	1	1	1	1	1	1	1	1	1	1	1	1	1	1	1	1	1	1	1	1	1	1	1	1	1	1	1	1	1	1	1	1	1	1	1	1	1	1	1	1	1	1	1	1
GC_00000708	1	1	1	1	1	1	1	1	1	1	1	1	1	1	1	1	1	1	1	1	1	1	1	1	1	1	1	1	1	1	1	1	1	1	1	1	1	1	1	1	1	1	1	1	1	1	1	1	1
GC_00000709	1	1	1	1	1	1	1	1	1	1	1	1	1	1	1	1	1	1	1	1	1	1	1	1	1	1	1	1	1	1	1	1	1	1	1	1	1	1	1	1	1	1	1	1	1	1	1	1	1
GC_00000710	1	1	1	1	0	1	1	0	1	1	1	1	1	1	1	1	1	1	1	1	1	1	1	1	1	1	1	1	1	1	1	1	1	1	1	1	1	1	1	1	1	1	1	1	1	1	1	1	1
GC_00000711	1	1	1	1	1	1	1	1	1	1	1	1	1	1	1	1	1	1	1	1	1	1	1	1	1	1	1	1	1	1	1	1	1	1	1	1	1	1	1	1	1	1	1	1	1	1	1	1	1
GC_00000712	1	1	1	0	0	1	1	1	1	1	1	1	1	1	1	1	1	1	1	1	1	1	1	1	1	1	1	1	1	1	1	1	1	1	1	1	1	1	1	1	1	1	1	1	1	1	1	1	1
GC_00000713	1	1	1	1	1	1	1	1	1	1	1	1	1	1	1	1	1	1	1	1	1	1	1	1	1	1	1	1	1	1	1	1	1	1	1	1	1	1	1	1	1	1	1	1	1	1	1	1	1
GC_00000714	1	1	1	1	1	1	1	1	1	1	1	1	1	1	1	1	1	1	1	1	1	1	1	1	1	1	1	1	1	1	1	1	1	1	1	1	1	1	1	1	1	1	1	1	1	1	1	1	1
GC_00000715	1	1	1	1	1	1	1	1	1	1	1	1	1	1	1	1	1	1	1	1	1	1	1	1	1	1	1	1	1	1	1	1	1	1	1	1	1	1	1	1	1	1	1	1	1	1	1	1	1
GC_00000716	1	1	1	1	1	1	1	1	1	1	1	1	1	1	1	1	1	1	1	1	1	1	1	1	1	1	1	1	1	1	1	1	1	1	1	1	1	1	1	1	1	1	1	1	1	1	1	1	1
GC_00000717	1	1	1	1	1	1	1	1	1	1	1	1	1	1	1	1	1	1	1	1	1	1	1	1	1	1	1	1	1	1	1	1	1	1	1	1	1	1	1	1	1	1	1	1	1	1	1	1	1
GC_00000718	1	1	1	1	1	1	1	0	1	1	1	1	1	1	1	1	1	1	1	1	1	1	1	1	1	1	1	1	1	1	1	1	1	1	1	1	1	1	1	1	1	1	1	1	1	1	1	1	1
GC_00000719	1	1	1	1	1	1	1	1	1	1	1	1	1	1	1	1	1	1	1	1	1	1	1	1	1	1	1	1	1	1	1	1	1	1	1	1	1	1	1	1	1	1	1	1	1	1	1	1	1
GC_00000720	1	1	1	1	1	1	1	1	1	1	1	1	1	1	1	1	1	1	1	1	1	1	1	1	1	1	1	1	1	1	1	1	1	1	1	1	1	1	1	1	1	1	1	1	1	1	1	1	1
GC_00000721	0	1	1	1	1	1	1	0	1	1	1	1	1	1	1	1	1	1	0	1	1	1	1	1	1	1	1	1	1	1	1	1	1	1	1	1	1	1	1	1	1	1	1	1	1	1	1	1	1
GC_00000722	1	1	1	1	1	1	1	1	1	1	1	1	1	1	1	1	1	1	1	1	1	1	1	1	1	1	1	1	1	1	1	1	1	1	1	1	1	1	1	1	1	1	1	1	1	1	1	1	1
GC_00000723	1	1	1	1	1	1	1	1	1	1	1	1	1	1	1	1	1	1	1	1	1	1	1	1	1	1	1	1	1	1	1	1	1	1	1	1	1	1	1	1	1	1	1	1	1	1	1	1	1
GC_00000724	1	1	1	1	1	1	1	1	1	0	1	1	1	1	1	0	1	1	1	0	1	1	0	1	1	1	1	1	1	1	1	1	1	0	1	0	0	0	0	0	0	0	0	1	1	1	1	1	0
GC_00000725	1	1	1	1	1	1	1	1	1	1	1	1	1	1	1	1	1	1	1	1	1	1	1	1	1	1	1	1	1	1	1	1	1	1	1	1	1	1	1	1	1	1	1	1	1	1	1	1	1
GC_00000726	0	0	0	0	0	0	1	1	1	0	1	0	0	1	1	0	1	0	1	0	1	1	0	1	1	1	1	1	1	1	1	1	1	0	1	0	0	0	0	0	0	0	0	1	1	1	1	1	1
GC_00000727	1	1	1	1	1	1	1	1	1	1	1	1	1	1	1	1	1	1	1	1	1	1	1	1	1	1	1	1	1	1	1	1	1	1	1	1	1	1	1	1	1	1	1	1	1	1	1	1	1
GC_00000728	1	1	1	1	1	1	1	1	1	1	1	1	1	1	1	1	1	1	1	1	1	1	1	1	1	1	1	1	1	1	1	1	1	1	1	1	1	1	1	1	1	1	1	1	1	1	1	1	1
GC_00000729	1	1	1	1	1	1	1	1	1	1	1	1	1	1	1	1	1	1	1	1	1	1	1	1	1	1	1	1	1	1	1	1	1	1	1	1	1	1	1	1	1	1	1	1	1	1	1	1	1
GC_00000730	1	1	1	1	1	1	1	1	1	1	1	1	1	1	1	1	1	1	1	1	1	1	1	1	1	1	1	1	1	1	1	1	1	1	1	1	1	1	1	1	1	1	1	1	1	1	1	1	1
GC_00000731	1	1	1	1	1	1	1	1	1	1	1	1	1	1	1	1	1	1	1	1	1	1	1	1	1	1	1	1	1	1	1	1	1	1	1	1	1	1	1	1	1	1	1	1	1	1	1	1	1
GC_00000732	0	0	0	0	0	0	0	0	0	0	1	0	0	1	1	1	1	0	1	0	1	1	0	1	1	1	1	1	1	0	1	1	1	0	1	0	0	0	0	0	0	0	0	1	1	1	1	1	1
GC_00000733	1	1	1	1	1	1	1	1	1	1	1	1	1	1	1	1	1	1	1	1	1	1	1	1	1	1	1	1	1	1	1	1	1	1	1	1	1	1	1	1	1	1	1	1	1	1	1	1	1
GC_00000734	1	1	1	1	1	1	1	1	1	1	1	1	1	1	1	1	1	1	1	1	1	1	1	1	1	1	1	1	1	1	1	1	1	1	1	1	1	1	1	1	1	1	1	1	1	1	1	1	1
GC_00000735	1	1	1	1	1	1	0	1	1	1	1	1	1	1	1	1	1	1	1	1	1	1	1	1	1	1	1	1	1	1	1	1	1	1	1	1	1	1	1	1	1	1	1	1	1	1	1	1	1
GC_00000736	1	1	1	1	1	1	0	1	1	1	1	1	1	1	1	1	1	1	1	1	1	1	1	1	1	1	1	1	1	1	1	1	1	1	1	1	1	1	1	1	1	1	1	1	1	1	1	1	1
GC_00000737	1	1	1	1	1	1	1	1	1	1	1	1	1	1	1	1	1	1	1	1	1	1	1	1	1	1	1	1	1	1	1	1	1	1	1	1	1	1	1	1	1	1	1	1	1	1	1	1	1
GC_00000738	1	1	1	0	1	1	1	1	1	1	1	1	0	1	1	1	1	1	1	1	1	1	1	1	1	1	1	1	1	1	1	1	1	0	1	1	1	1	1	1	1	1	1	1	1	1	1	1	1
GC_00000739	1	1	1	1	1	1	1	1	1	1	1	1	1	1	1	1	1	1	1	1	1	1	1	1	1	1	1	1	1	1	1	1	1	1	1	1	1	1	1	1	1	1	1	1	1	1	1	1	1
GC_00000740	1	1	1	1	0	1	1	1	1	1	1	1	1	1	1	1	1	1	1	1	1	1	1	1	1	1	1	1	1	1	1	1	1	1	1	1	1	1	1	1	1	1	1	1	1	1	1	1	1
GC_00000741	1	1	1	1	1	1	1	1	1	1	1	1	1	1	1	1	1	1	1	1	1	1	1	1	1	1	1	1	1	1	1	1	0	1	1	1	1	1	1	1	1	1	1	1	1	1	1	1	1
GC_00000742	1	1	1	1	0	1	1	0	1	1	1	1	1	1	1	1	1	1	1	1	1	1	1	1	1	1	1	1	1	1	1	1	1	1	1	1	1	1	1	1	1	1	1	1	1	1	1	1	1
GC_00000743	1	1	1	1	0	1	1	1	1	1	1	1	1	1	1	1	1	1	1	1	1	1	1	1	1	1	1	1	1	1	1	1	1	1	1	1	1	1	1	1	1	1	1	1	1	1	1	1	1
GC_00000744	1	1	1	1	1	1	1	1	1	1	1	1	1	1	1	1	1	1	1	1	1	1	1	1	1	1	1	1	1	1	1	1	1	1	1	1	1	1	1	1	1	1	1	1	1	1	1	1	1
GC_00000745	1	1	1	1	1	1	1	1	1	1	1	1	1	1	1	1	1	1	1	1	1	1	1	1	1	1	1	1	1	1	1	1	1	1	1	1	1	1	1	1	1	1	1	1	1	1	1	1	1
GC_00000746	1	1	1	1	0	1	1	1	1	1	1	1	1	1	1	1	1	1	1	1	1	1	1	1	1	1	1	1	1	1	1	1	1	1	0	1	1	1	1	1	1	1	1	1	1	1	1	1	1
GC_00000747	1	1	1	1	1	1	1	1	1	1	1	1	1	1	1	1	1	1	1	1	1	1	1	1	1	1	1	1	1	1	1	1	1	1	1	1	1	1	1	1	1	1	1	1	1	1	1	1	1
GC_00000748	1	1	1	0	1	1	1	1	1	1	1	1	1	1	1	1	1	1	1	1	1	1	1	1	1	1	1	1	1	1	1	1	1	1	1	1	1	1	1	1	1	1	1	1	1	1	1	1	1
GC_00000749	1	0	1	1	1	1	1	1	1	1	1	1	1	1	1	1	1	1	1	1	1	1	1	1	1	1	1	1	1	1	1	1	1	1	1	1	1	1	1	1	1	1	1	1	1	1	1	1	1
GC_00000750	1	1	1	0	1	1	1	0	1	1	1	1	1	1	1	1	1	1	1	1	1	1	1	1	1	1	1	1	1	1	1	1	1	1	1	1	1	1	1	1	1	1	1	1	1	1	1	1	1
GC_00000751	1	1	1	1	1	1	1	1	1	1	1	1	1	1	1	1	1	1	1	1	1	1	1	1	1	1	1	1	1	1	1	1	1	1	1	1	1	1	1	1	1	1	1	1	1	1	1	1	1
GC_00000752	0	1	1	1	1	1	1	1	1	1	1	1	1	1	1	1	1	1	1	1	1	1	1	1	1	1	1	1	1	1	1	1	1	1	1	1	1	1	1	1	1	1	1	1	1	1	1	1	1
GC_00000753	1	1	1	1	1	1	1	0	1	1	1	1	1	1	1	1	1	1	1	1	1	1	1	1	1	1	1	1	1	1	1	1	1	1	1	1	1	1	1	1	1	1	1	1	1	1	1	1	1
GC_00000754	1	1	1	1	1	1	1	0	1	1	1	1	1	1	1	1	1	1	1	1	1	1	1	1	1	1	1	1	1	1	1	1	1	1	1	1	1	1	1	1	1	1	1	1	1	1	1	1	1
GC_00000755	1	1	1	1	1	1	1	1	1	1	1	1	1	1	1	1	1	1	1	1	1	1	1	1	1	1	1	1	1	1	1	1	1	0	1	1	1	1	1	1	1	1	1	1	1	1	1	1	1
GC_00000756	1	1	1	1	1	1	1	1	1	1	1	1	1	1	1	1	1	1	1	1	1	1	1	1	1	1	1	1	1	1	1	1	0	1	1	1	1	1	1	1	1	1	1	1	1	1	1	1	1
GC_00000757	0	0	0	0	0	0	0	0	1	0	0	0	0	1	1	0	1	0	1	0	1	1	0	1	1	1	1	1	0	1	1	1	1	0	0	0	0	0	0	0	0	0	0	1	1	1	1	1	1
GC_00000758	1	1	1	1	1	1	1	0	1	0	1	1	0	1	1	1	1	1	1	1	1	1	1	1	1	1	1	1	1	1	1	1	1	1	1	1	1	1	1	1	1	0	0	1	1	1	1	1	1
GC_00000759	1	1	1	1	1	1	1	1	1	1	1	1	1	1	1	1	1	1	1	1	1	1	1	1	1	1	1	1	1	1	1	1	1	1	1	1	1	1	1	1	1	1	1	1	1	1	1	1	1
GC_00000760	0	1	0	0	1	0	0	0	0	0	1	1	0	0	0	1	0	1	0	0	0	0	0	0	0	0	0	0	0	0	0	0	0	1	0	0	0	0	0	0	0	0	0	0	0	0	0	0	0
GC_00000761	0	1	1	1	1	1	1	1	1	1	1	1	1	1	1	1	1	1	1	1	1	1	1	1	1	1	1	1	1	1	1	1	1	1	1	1	1	1	1	1	1	1	1	1	1	1	1	1	1
GC_00000762	1	1	1	1	1	1	1	1	1	1	1	1	0	1	1	1	1	1	1	1	1	1	1	1	1	1	1	1	1	1	1	1	1	1	1	1	1	1	1	1	1	1	1	1	1	1	1	1	1
GC_00000763	1	0	1	0	1	1	1	1	1	1	1	1	0	1	1	1	1	1	1	1	1	1	1	1	1	1	1	1	1	1	1	1	1	1	1	1	1	1	1	1	1	1	1	1	1	1	1	1	1
GC_00000764	1	0	1	1	1	1	0	1	1	1	1	1	1	1	1	1	1	1	1	1	1	1	1	1	1	1	1	1	1	1	1	1	1	1	1	1	1	1	1	1	1	1	1	1	1	1	1	1	1
GC_00000765	1	1	1	1	1	1	1	1	1	1	1	1	1	1	1	1	1	1	1	1	1	1	1	1	1	1	1	1	1	1	1	1	1	1	1	1	1	1	1	1	1	1	1	1	1	1	1	1	1
GC_00000766	1	0	1	1	1	1	1	1	1	1	1	1	1	1	1	1	1	1	1	1	1	1	1	1	1	1	1	1	1	1	1	1	1	1	1	1	1	1	1	1	1	1	1	1	1	1	1	1	1
GC_00000767	1	0	1	1	1	1	1	0	1	1	1	1	1	1	1	1	1	1	1	1	1	1	1	1	1	1	1	1	1	1	1	1	1	1	1	1	1	1	1	1	1	1	1	1	1	1	1	1	1
GC_00000768	1	1	1	1	1	1	1	1	1	1	1	1	1	1	1	1	1	1	1	1	1	1	1	1	1	1	1	1	1	0	1	1	0	1	1	1	1	1	1	1	1	1	1	1	1	1	1	1	1
GC_00000769	1	0	0	1	0	1	1	1	1	0	1	1	0	1	1	1	1	1	1	0	1	1	0	1	1	1	1	1	1	1	1	1	1	1	1	0	0	0	0	0	0	0	0	1	1	1	1	1	1
GC_00000770	1	1	1	1	1	1	0	0	1	1	1	1	1	1	1	1	1	1	1	1	1	1	1	1	1	1	1	1	1	1	1	1	1	1	1	1	1	1	1	1	1	1	1	1	1	1	1	1	1
GC_00000771	1	1	1	1	1	1	0	1	1	1	1	1	0	1	1	1	1	1	1	1	1	1	1	1	1	1	1	1	1	1	1	1	1	1	1	1	1	1	1	1	1	1	1	1	1	1	1	1	1
GC_00000772	0	1	1	0	0	1	1	1	1	1	1	1	1	1	1	1	1	1	1	1	1	1	1	1	1	1	1	1	0	1	1	1	1	1	1	1	1	1	1	1	1	1	1	1	1	1	1	1	1
GC_00000773	0	0	0	1	0	0	0	1	1	1	1	0	0	1	1	1	1	0	1	1	1	1	1	1	1	1	1	1	0	1	1	1	1	0	1	1	1	1	1	1	1	1	1	1	1	1	1	1	1
GC_00000774	1	0	1	0	0	1	0	0	1	0	0	0	0	1	1	0	1	0	1	0	1	1	0	1	1	1	1	1	0	1	1	1	1	0	0	0	0	0	0	0	0	0	0	1	1	1	1	1	1
GC_00000775	1	1	1	1	1	1	1	1	1	1	1	1	1	1	1	1	1	1	1	1	1	1	1	1	1	1	1	1	1	1	1	1	1	1	1	1	1	1	1	1	1	1	1	1	1	1	1	1	1
GC_00000776	1	0	1	1	0	1	0	1	1	1	1	1	1	1	1	1	1	1	1	1	1	1	1	1	1	1	1	1	1	1	1	1	1	1	1	1	1	1	1	1	1	1	1	1	1	1	1	1	1
GC_00000777	1	1	1	1	0	1	0	1	1	1	1	1	1	1	1	1	1	1	1	1	1	1	1	1	1	1	1	1	1	1	1	1	1	1	1	1	1	1	1	1	1	1	1	1	1	1	1	1	1
GC_00000778	1	1	1	1	0	1	1	1	1	1	1	1	1	1	1	1	1	1	1	1	1	1	1	1	1	1	1	1	1	1	1	1	1	1	1	1	1	1	1	1	1	1	1	1	1	1	1	1	1
GC_00000779	1	0	1	1	0	1	0	1	1	1	1	1	1	1	1	1	1	1	1	1	1	1	1	1	1	1	1	1	1	1	1	1	1	1	1	1	1	1	1	1	1	1	1	1	1	1	1	1	1
GC_00000780	1	1	1	1	1	1	1	1	1	1	1	1	1	1	1	1	1	1	1	1	1	1	1	1	1	1	1	1	1	1	1	1	1	1	1	1	1	1	1	1	1	1	1	1	1	1	1	1	1
GC_00000781	1	0	1	1	1	1	0	1	1	1	1	1	1	1	1	1	1	1	1	1	1	1	1	1	1	1	1	1	1	1	1	1	1	1	1	1	1	1	1	1	1	1	1	1	1	1	1	1	1
GC_00000782	1	0	1	1	0	1	1	1	1	1	1	1	1	1	1	1	1	1	1	1	1	1	1	1	1	1	1	1	1	1	1	1	1	1	1	1	1	1	1	1	1	1	1	1	1	1	1	1	1
GC_00000783	1	1	1	1	1	1	1	1	1	1	1	1	1	1	1	1	1	1	1	1	1	1	1	1	1	1	1	1	1	1	1	1	1	1	1	1	1	1	1	1	1	1	1	1	1	1	1	1	1
GC_00000784	1	1	1	1	0	1	1	1	1	1	1	1	1	1	1	1	1	1	1	1	0	1	1	1	1	1	1	1	1	1	1	1	1	1	1	1	1	1	1	1	1	1	1	1	1	1	1	1	1
GC_00000785	0	0	0	0	0	0	1	1	1	0	0	0	0	1	1	0	1	0	1	0	1	1	0	1	1	1	1	1	1	1	1	1	1	0	0	0	0	0	0	0	0	0	0	1	1	1	1	1	0
GC_00000786	1	1	1	0	0	1	1	1	1	1	1	1	1	1	1	1	1	1	1	1	1	1	1	1	1	1	1	1	1	1	1	1	1	1	1	1	1	1	1	1	1	1	1	1	1	1	1	1	1
GC_00000787	0	0	0	1	0	0	1	0	1	0	1	1	0	1	1	1	1	1	1	0	1	1	0	1	1	1	1	1	1	1	1	1	1	0	1	0	0	0	0	0	0	0	0	1	1	1	1	1	1
GC_00000788	1	1	1	1	1	1	1	1	1	1	1	1	1	1	1	1	1	1	1	1	1	1	1	1	1	1	1	1	1	1	1	1	1	1	1	1	1	1	1	1	1	1	1	1	1	1	1	1	1
GC_00000789	1	1	1	0	1	1	0	1	1	1	1	1	1	1	1	1	1	1	0	1	1	1	1	1	1	1	1	1	1	1	1	1	1	1	1	1	1	1	1	1	1	1	1	1	1	1	1	1	1
GC_00000790	1	1	1	1	1	1	1	1	1	1	1	1	1	1	1	1	1	1	1	1	1	1	1	1	1	1	1	1	1	1	1	1	1	1	1	1	1	1	1	1	1	1	1	1	1	1	1	1	1
GC_00000791	1	1	1	1	1	1	1	1	1	1	1	1	1	1	1	1	1	1	1	1	1	1	1	1	1	1	1	1	1	1	1	1	1	1	1	1	1	1	1	1	1	1	1	1	1	1	1	1	1
GC_00000792	1	1	1	1	1	1	1	1	1	1	1	1	1	1	1	1	1	1	1	1	1	1	1	1	1	1	1	1	1	1	1	1	1	1	1	1	1	1	1	1	1	1	1	1	1	1	1	1	1
GC_00000793	1	1	1	1	1	1	1	1	1	1	1	1	1	1	1	1	1	1	1	1	1	1	1	1	1	1	1	1	1	1	1	1	1	1	1	1	1	1	1	1	1	1	1	1	1	1	1	1	1
GC_00000794	1	1	1	1	1	1	1	1	1	1	1	1	1	1	1	1	1	1	1	1	1	1	1	1	1	1	1	1	1	1	1	1	1	1	1	1	1	1	1	1	1	1	1	1	1	1	1	1	1
GC_00000795	1	1	1	1	1	1	1	1	1	1	1	1	1	1	1	1	1	1	1	1	1	1	1	1	1	1	1	1	1	1	1	1	1	1	1	1	1	1	1	1	1	1	1	1	1	1	1	1	1
GC_00000796	1	1	1	1	1	1	1	1	1	1	1	1	1	1	1	1	1	1	1	1	1	1	1	1	1	1	1	1	1	1	1	1	1	1	1	1	1	1	1	1	1	1	1	1	1	1	1	1	1
GC_00000797	1	1	1	0	1	1	1	1	1	1	1	1	1	1	1	1	1	1	1	1	1	1	1	1	1	1	1	1	1	1	1	1	1	1	1	1	1	1	1	1	1	1	1	1	1	1	1	1	1
GC_00000798	1	0	1	1	1	1	1	1	1	1	1	0	1	1	1	1	1	1	1	1	1	1	1	1	1	1	1	1	1	1	1	1	1	1	1	1	1	1	1	1	1	1	1	1	1	1	1	1	1
GC_00000799	1	1	1	1	1	1	1	1	1	1	1	1	1	1	1	1	1	1	1	1	1	1	1	1	1	1	1	1	1	1	1	1	1	1	1	1	1	1	1	1	1	1	1	1	1	1	1	1	1
GC_00000800	0	0	0	1	0	0	1	1	1	1	1	0	1	1	1	1	1	0	1	1	1	1	1	1	1	1	1	1	1	1	1	1	1	0	1	1	1	1	1	1	1	1	1	1	1	1	1	1	1
GC_00000801	1	0	1	1	1	1	1	1	1	1	1	1	1	1	1	1	1	1	1	1	1	1	1	1	1	1	1	1	1	1	1	1	1	1	1	1	1	1	1	1	1	1	1	1	1	1	1	1	1
GC_00000802	1	1	1	1	1	1	1	1	1	1	1	1	1	1	1	1	1	1	1	1	1	0	1	1	1	1	1	1	1	1	1	1	1	1	1	1	1	1	1	1	1	1	1	1	1	1	1	1	1
GC_00000803	0	1	0	1	0	0	1	1	0	0	0	1	1	1	0	0	0	1	1	0	1	0	0	0	0	0	0	0	1	0	0	0	0	0	0	0	0	0	0	0	0	0	0	0	0	0	0	0	0
GC_00000804	1	1	1	1	1	1	1	1	1	1	1	1	1	1	1	1	1	1	1	1	1	1	1	1	1	1	1	1	1	1	1	1	1	1	1	1	1	1	1	1	1	1	1	1	1	1	1	1	1
GC_00000805	1	1	1	1	1	1	1	1	1	1	1	1	1	1	1	1	1	1	1	1	1	1	1	1	1	1	1	1	1	1	1	1	1	1	1	1	1	1	1	1	1	1	1	1	1	1	1	1	1
GC_00000806	1	1	1	1	1	1	1	1	1	1	1	1	1	1	1	1	1	1	1	1	1	1	1	1	1	1	1	1	1	1	1	1	1	1	1	1	1	1	1	1	1	1	1	1	1	1	1	1	1
GC_00000807	0	0	0	1	0	0	0	0	1	0	1	0	0	1	1	1	1	0	1	0	1	1	0	1	1	1	1	1	0	1	1	1	1	0	1	0	0	0	0	0	0	0	0	1	1	1	1	1	1
GC_00000808	1	0	1	0	0	1	1	0	1	0	1	1	0	1	1	1	1	1	1	0	1	1	0	1	1	1	1	1	1	1	1	1	1	1	1	0	0	0	0	0	0	0	0	1	1	1	1	1	1
GC_00000809	0	0	0	0	0	0	0	0	0	0	0	0	0	0	0	0	0	0	0	0	0	0	0	0	0	0	0	0	0	0	0	0	0	0	0	0	0	0	0	0	0	0	0	0	0	0	0	0	0
GC_00000810	1	0	1	1	1	1	1	1	1	1	1	1	1	1	1	1	1	1	1	1	1	1	1	1	1	1	1	1	1	1	1	1	1	1	1	1	1	1	1	1	1	1	1	1	1	1	1	1	1
GC_00000811	1	1	1	1	1	1	1	1	1	1	1	1	1	1	1	1	1	1	1	1	1	1	1	1	1	1	1	1	1	1	1	1	1	1	1	1	1	1	1	1	1	1	1	1	1	1	1	1	1
GC_00000812	1	1	1	1	1	1	1	1	1	1	1	1	1	1	1	1	1	1	1	1	1	1	1	1	1	1	1	1	1	1	1	1	1	1	1	1	1	1	1	1	1	1	1	1	1	1	1	1	1
GC_00000813	1	1	1	1	1	1	1	1	1	1	1	1	1	1	1	1	1	1	1	1	1	1	1	1	1	1	1	1	1	1	1	1	1	1	1	1	1	1	1	1	1	1	1	1	1	1	1	1	1
GC_00000814	1	1	1	1	1	1	1	1	1	1	1	1	1	1	1	1	1	1	1	1	1	1	1	1	1	1	1	1	1	1	1	1	1	1	1	1	1	1	1	1	1	1	1	1	1	1	1	1	1
GC_00000815	1	0	1	1	1	1	1	1	1	1	1	1	1	1	1	1	1	1	1	1	1	1	1	1	1	1	1	1	1	1	1	1	1	1	1	1	1	1	1	1	1	1	1	1	1	1	1	1	1
GC_00000816	1	1	1	1	1	1	1	1	1	1	1	1	1	1	1	1	1	1	1	1	1	1	1	1	1	1	1	1	1	1	1	1	1	1	1	1	1	1	1	1	1	1	1	1	1	1	1	1	1
GC_00000817	1	1	1	1	1	1	1	1	1	1	1	1	1	1	1	1	1	1	1	1	1	1	1	1	1	1	1	1	1	1	1	1	1	1	1	1	1	1	1	1	1	1	1	1	1	1	1	1	1
GC_00000818	1	1	1	1	1	1	1	1	1	1	1	1	1	1	1	1	1	1	1	1	1	1	1	1	1	1	1	1	1	1	1	1	1	1	1	1	1	1	1	1	1	1	1	1	1	1	1	1	1
GC_00000819	0	0	1	1	1	0	1	1	1	1	1	0	0	1	1	1	1	0	1	1	1	1	1	1	1	1	1	1	1	1	1	1	1	1	1	1	1	1	1	1	1	1	1	1	1	1	1	1	1
GC_00000820	1	1	1	1	1	1	1	1	1	0	1	1	0	1	1	0	1	1	1	0	1	1	0	1	1	1	1	1	1	1	1	1	1	1	0	0	0	0	0	0	0	0	0	1	1	1	1	1	1
GC_00000821	1	1	1	1	1	1	1	1	1	1	1	1	1	1	1	1	1	1	1	1	1	1	1	1	1	1	1	1	1	1	1	1	1	1	1	1	1	1	1	1	1	1	1	1	1	1	1	1	1
GC_00000822	1	1	1	1	1	1	1	1	1	1	1	1	1	1	1	1	1	1	1	1	1	1	1	1	1	1	1	1	1	1	1	1	1	1	1	1	1	1	1	1	1	1	1	1	1	1	1	1	1
GC_00000823	1	0	1	1	1	1	0	1	1	1	1	1	1	1	1	1	1	1	1	1	1	1	1	1	1	1	1	1	1	1	1	1	1	1	1	1	1	1	1	1	1	1	1	1	1	1	1	1	1
GC_00000824	1	1	1	1	1	1	0	1	1	0	0	1	0	1	0	0	0	1	1	0	1	1	0	1	1	1	1	1	1	1	1	1	1	1	0	0	0	0	0	0	0	0	0	1	0	0	0	0	1
GC_00000825	1	1	1	1	1	1	1	1	1	1	1	1	0	1	1	1	1	1	1	1	1	1	1	1	1	1	1	1	1	1	1	1	1	1	1	1	1	1	1	1	1	1	1	1	1	1	1	1	1
GC_00000826	0	1	1	0	0	1	1	0	1	0	1	1	0	1	1	1	0	1	1	0	1	1	0	1	1	1	1	1	1	1	1	1	1	0	1	0	0	0	0	0	0	0	0	1	1	1	1	1	0
GC_00000827	1	1	1	1	1	1	1	1	1	1	1	1	1	1	1	1	1	1	1	1	1	1	1	1	1	1	1	1	1	1	1	1	1	1	1	1	1	1	1	1	1	1	1	1	1	1	1	1	1
GC_00000828	1	1	1	1	1	1	1	1	1	1	1	1	1	1	1	1	1	1	1	1	1	1	1	1	1	1	1	1	1	1	1	1	1	1	1	1	1	1	1	1	1	1	1	1	1	1	1	1	1
GC_00000829	1	1	1	1	1	1	1	1	1	1	1	1	1	1	1	1	1	1	1	1	1	1	1	1	1	1	1	1	1	1	1	1	1	1	1	1	1	1	1	1	1	1	1	1	1	1	1	1	1
GC_00000830	1	1	1	1	1	1	1	1	1	1	1	1	1	1	1	0	1	1	1	1	1	1	1	1	1	1	1	1	1	1	1	1	1	1	1	1	1	1	1	1	1	1	1	1	1	1	1	1	1
GC_00000831	1	1	1	1	1	1	1	1	1	1	1	1	1	1	1	1	1	1	1	1	1	1	1	1	1	1	1	1	1	1	1	1	1	1	1	1	1	1	1	1	1	1	1	1	1	1	1	1	1
GC_00000832	1	1	1	0	1	1	1	0	0	0	1	1	0	1	1	1	1	1	1	0	1	1	0	1	1	1	1	1	1	0	1	1	1	1	1	0	0	0	0	0	0	0	0	1	1	1	1	1	1
GC_00000833	1	1	1	1	1	1	1	0	1	1	1	1	1	1	1	1	1	1	1	1	1	1	1	1	1	1	1	1	1	1	1	1	1	1	1	1	1	1	1	1	1	1	1	1	1	1	1	1	1
GC_00000834	1	1	1	1	1	1	1	1	1	1	1	1	1	1	1	1	1	1	1	1	1	1	1	1	1	1	1	1	1	1	1	1	1	1	1	1	1	1	1	1	1	1	1	1	1	1	1	1	1
GC_00000835	1	1	1	1	1	1	1	1	1	1	1	1	1	1	1	1	1	1	1	1	1	1	1	1	1	1	1	1	1	1	1	1	1	1	1	1	1	1	1	1	1	1	1	1	1	1	1	1	1
GC_00000836	1	1	1	1	1	1	1	1	1	1	1	1	1	1	1	1	1	1	1	1	1	1	1	1	1	1	1	1	1	1	1	1	1	1	1	1	1	1	1	1	1	1	1	1	1	1	1	1	1
GC_00000837	1	1	1	1	1	1	1	1	1	1	1	1	0	1	1	1	1	1	1	1	1	1	1	1	1	1	1	1	1	1	1	1	1	1	1	1	1	1	1	1	1	1	1	1	1	1	1	1	1
GC_00000838	1	1	1	1	1	1	1	1	1	1	1	1	1	1	1	1	1	1	1	1	1	1	1	1	1	1	1	1	1	1	1	1	1	1	1	1	1	1	1	1	1	1	1	1	1	1	1	1	1
GC_00000839	1	1	1	0	1	1	1	1	1	1	1	1	1	1	1	1	1	1	1	1	1	1	1	1	1	1	1	1	1	1	1	1	1	1	1	1	1	1	1	1	1	1	1	1	1	1	1	1	1
GC_00000840	1	1	1	1	1	1	1	1	1	1	1	1	1	1	1	1	1	1	0	1	1	1	1	1	1	1	1	1	1	1	1	1	1	1	1	1	1	1	1	1	1	1	1	1	1	1	1	1	1
GC_00000841	1	1	1	1	1	1	1	1	1	1	1	1	1	1	1	1	1	1	1	1	1	1	1	1	1	1	1	1	1	1	1	1	1	1	1	1	1	1	1	1	1	1	1	1	1	1	1	1	1
GC_00000842	1	1	1	1	1	1	1	1	1	1	1	1	1	1	1	1	1	1	1	1	1	1	1	1	1	1	1	1	1	1	1	1	1	1	1	1	1	1	1	1	1	1	1	1	1	1	1	1	1
GC_00000843	1	1	1	1	1	1	1	1	1	1	1	1	1	1	1	1	1	1	1	1	1	1	1	1	1	1	1	1	1	1	1	1	1	1	1	1	1	1	1	1	1	1	1	1	1	1	1	1	1
GC_00000844	0	1	0	1	1	0	1	1	1	1	1	1	0	1	1	1	1	1	1	1	1	1	1	1	1	1	1	1	1	1	1	1	1	0	1	1	1	1	1	1	1	1	1	1	1	1	1	1	1
GC_00000845	1	0	1	1	1	1	1	1	1	1	1	1	0	1	1	1	1	1	1	1	1	1	1	1	1	1	1	1	1	1	1	1	1	1	1	1	1	1	1	1	1	1	1	1	1	1	1	1	1
GC_00000846	1	1	1	0	0	1	1	1	1	0	1	1	1	1	1	1	1	1	0	0	1	1	0	1	1	1	1	1	1	1	1	1	1	1	1	0	0	0	0	0	0	0	0	1	1	1	1	1	1
GC_00000847	1	1	1	1	1	1	1	1	1	0	1	1	1	1	1	1	1	1	1	0	1	1	0	1	1	1	1	1	1	1	1	1	1	0	1	0	0	0	0	0	0	0	0	1	1	1	1	1	1
GC_00000848	1	1	1	1	1	1	1	1	1	0	1	1	0	1	1	0	1	1	1	0	1	1	0	1	1	1	1	1	0	1	1	1	1	1	1	0	0	0	0	0	0	0	0	1	1	1	1	1	0
GC_00000849	0	1	0	1	0	0	1	1	1	1	1	0	1	1	1	1	1	0	1	1	1	1	1	1	1	1	1	1	1	1	1	1	1	0	1	1	1	1	1	1	1	1	1	1	1	1	1	1	1
GC_00000850	1	1	1	1	0	1	1	1	1	1	1	1	1	1	1	1	1	1	1	1	1	1	1	1	1	1	1	1	1	1	1	1	1	1	1	1	1	1	1	1	1	1	1	1	1	1	1	1	1
GC_00000851	1	1	1	1	1	1	1	1	1	1	1	1	1	1	1	1	1	1	1	1	1	1	1	1	1	1	1	1	1	1	1	1	1	1	1	1	1	1	1	1	1	1	1	1	1	1	1	1	1
GC_00000852	1	1	1	1	1	1	1	1	1	1	1	1	1	1	1	1	1	1	1	1	1	1	1	1	1	1	1	1	1	1	1	1	1	1	1	1	1	1	1	1	1	1	1	1	1	1	1	1	1
GC_00000853	1	1	1	1	1	1	1	1	1	1	1	1	1	1	1	1	1	1	1	1	1	1	1	1	1	1	1	1	1	1	1	1	1	1	1	1	1	1	1	1	1	1	1	1	1	1	1	1	1
GC_00000854	1	1	1	1	0	1	1	1	1	1	1	1	1	1	1	1	1	1	1	1	1	1	1	1	1	1	1	1	1	1	1	1	1	1	1	1	1	1	1	1	1	1	1	1	1	1	1	1	1
GC_00000855	1	1	1	1	1	1	1	1	1	1	1	1	0	1	1	1	1	1	1	1	1	1	1	0	1	1	1	1	1	1	1	1	1	1	1	1	1	1	1	1	1	1	1	0	1	1	1	1	1
GC_00000856	1	1	1	1	1	1	1	1	1	1	1	1	1	1	1	1	1	1	1	1	1	1	1	1	1	1	1	1	1	1	1	1	1	1	1	1	1	1	1	1	1	1	1	1	1	1	1	1	1
GC_00000857	1	1	1	1	1	1	1	1	1	1	1	1	1	1	1	1	1	1	1	1	1	1	1	1	1	1	1	1	1	1	1	1	1	1	1	1	1	1	1	1	1	1	1	1	1	1	1	1	1
GC_00000858	1	1	1	1	1	1	1	1	1	1	1	1	1	1	1	1	1	1	1	1	1	1	1	1	1	1	1	1	1	1	1	1	1	1	1	1	1	1	1	1	1	1	1	1	1	1	1	1	1
GC_00000859	1	1	1	1	1	1	1	1	1	1	1	1	1	1	1	1	1	1	1	1	1	1	1	1	1	1	1	1	1	1	1	1	1	1	1	1	1	1	1	1	1	1	1	1	1	1	1	1	1
GC_00000860	1	1	1	1	1	1	1	1	1	1	1	1	1	1	1	1	1	1	1	1	1	1	1	1	1	1	1	1	1	1	1	1	1	1	1	1	1	1	1	1	1	1	1	1	1	1	1	1	1
GC_00000861	1	1	1	1	1	1	1	1	1	0	1	1	1	1	1	1	1	1	1	0	1	1	0	1	1	1	1	1	1	1	1	1	1	1	1	0	0	0	0	0	0	0	0	1	1	1	1	1	1
GC_00000862	1	1	1	1	1	1	1	1	1	1	1	1	1	1	1	1	1	1	1	1	1	1	1	1	1	1	1	1	1	1	1	1	1	1	1	1	1	1	1	1	1	1	1	1	1	1	1	1	1
GC_00000863	1	1	1	1	1	1	1	1	1	1	1	1	1	1	1	1	1	1	1	1	1	1	1	1	1	1	1	1	1	1	1	1	1	1	1	1	1	1	1	1	1	1	1	1	1	1	1	1	1
GC_00000864	1	1	1	1	1	1	1	1	1	1	1	1	1	1	1	1	1	1	1	1	1	1	1	1	1	1	1	1	1	1	1	1	1	1	1	1	1	1	1	1	1	1	1	1	1	1	1	1	1
GC_00000865	1	1	1	1	0	1	1	1	1	1	1	1	1	1	1	1	1	1	1	1	1	1	1	1	1	1	1	1	1	1	1	1	1	1	1	1	1	1	1	1	1	1	1	1	1	1	1	1	1
GC_00000866	1	1	1	0	1	1	1	1	1	1	1	1	1	1	1	1	1	1	1	1	1	1	1	1	1	1	1	1	1	1	1	1	1	1	1	1	1	1	1	1	1	1	1	1	1	1	1	1	1
GC_00000867	1	1	1	1	1	1	1	1	1	1	1	1	1	1	1	1	1	1	1	1	1	1	1	1	1	1	1	1	1	1	1	1	1	1	1	1	1	1	1	1	1	1	1	1	1	1	1	1	1
GC_00000868	1	1	1	1	1	1	1	1	1	1	1	1	1	1	1	1	1	1	1	1	1	1	1	1	1	1	1	1	1	1	1	1	1	1	1	1	1	1	1	1	1	1	1	1	1	1	1	1	1
GC_00000869	1	1	1	1	1	1	1	1	1	1	1	1	1	1	1	1	1	1	1	1	1	1	1	1	1	1	1	1	1	1	1	1	1	1	1	1	1	1	1	1	1	1	1	1	1	1	1	1	1
GC_00000870	1	1	1	1	1	1	1	1	1	1	1	1	1	1	1	1	1	1	1	1	1	1	1	1	1	1	1	1	1	1	1	1	1	1	1	1	1	1	1	1	1	1	1	1	1	1	1	1	1
GC_00000871	1	1	1	1	1	1	1	1	1	1	1	1	1	1	1	1	1	1	1	1	1	1	1	1	1	1	1	1	1	1	1	1	1	1	1	1	1	1	1	1	1	1	1	1	1	1	1	1	1
GC_00000872	1	1	1	0	1	1	1	0	1	1	1	1	1	1	1	1	1	1	1	1	1	1	1	1	1	1	1	1	1	1	1	1	1	1	1	1	1	1	1	1	1	1	1	1	1	1	1	1	1
GC_00000873	0	1	0	1	0	0	1	1	1	0	1	1	1	1	1	1	1	0	0	1	1	1	1	1	1	1	1	1	1	1	1	1	1	1	1	1	1	1	1	1	1	0	0	1	1	1	1	1	1
GC_00000874	1	1	1	1	1	1	1	1	1	1	1	1	1	1	1	1	1	1	1	1	1	1	1	1	1	1	1	1	1	1	1	1	1	1	1	1	1	1	1	1	1	1	1	1	1	1	1	1	1
GC_00000875	1	1	1	1	1	1	1	1	1	1	1	1	1	1	1	1	1	1	1	1	1	1	1	1	1	1	1	1	1	1	1	1	1	1	1	1	1	1	1	1	1	1	1	1	1	1	1	1	1
GC_00000876	0	1	0	0	0	0	0	0	1	0	1	1	0	1	1	1	1	1	1	0	1	1	0	1	1	1	1	1	1	1	1	0	1	0	0	0	0	0	0	0	0	0	0	1	1	1	1	1	1
GC_00000877	1	1	1	0	1	1	1	0	1	0	1	1	0	1	1	1	1	1	1	0	1	1	0	1	1	1	1	1	0	1	1	1	1	1	1	0	0	0	0	0	0	0	0	1	1	1	1	1	1
GC_00000878	0	1	0	0	0	0	1	0	1	0	1	0	0	1	1	0	1	0	0	0	1	1	0	0	1	1	1	1	1	1	1	1	1	0	1	0	0	0	0	0	0	0	0	0	1	1	1	1	1
GC_00000879	0	0	0	0	0	0	0	0	1	0	0	0	0	1	1	0	1	0	1	0	1	1	0	1	1	1	0	1	1	1	1	1	1	0	0	0	0	0	0	0	0	0	0	1	1	1	1	1	1
GC_00000880	1	1	1	1	1	1	1	1	1	1	1	1	1	1	1	1	1	1	1	1	1	1	1	1	1	1	1	1	1	1	1	1	1	1	1	1	1	1	1	1	1	1	1	1	1	1	1	1	1
GC_00000881	0	1	0	1	0	0	1	0	0	0	0	1	1	1	0	1	0	1	1	0	0	0	0	0	0	0	0	0	1	0	0	0	0	0	0	0	0	0	0	0	0	0	0	0	0	0	0	0	0
GC_00000882	1	0	1	1	1	1	1	1	1	0	1	1	0	1	1	1	1	1	1	0	1	1	0	1	1	1	1	1	1	1	1	1	1	1	1	0	0	0	0	0	0	0	0	1	1	1	1	1	1
GC_00000883	1	1	1	1	1	1	1	1	1	1	1	1	1	1	1	1	1	1	1	1	1	1	1	1	1	1	1	1	1	1	1	1	1	1	1	1	1	1	1	1	1	1	1	1	1	1	1	1	1
GC_00000884	1	1	1	1	1	1	1	1	1	1	1	1	1	1	1	1	1	1	1	1	1	1	1	1	1	1	1	1	1	1	1	1	1	1	1	1	1	1	1	1	1	1	1	1	1	1	1	1	1
GC_00000885	1	0	1	1	1	1	1	1	1	1	1	1	1	1	1	1	1	1	1	1	1	1	1	1	1	1	1	1	1	1	1	1	1	1	1	1	1	1	1	1	1	1	1	1	1	1	1	1	1
GC_00000886	1	1	1	1	1	1	1	1	1	1	1	1	1	1	1	1	1	1	1	1	1	1	1	1	1	1	1	1	1	1	1	1	1	1	1	1	1	1	1	1	1	1	1	1	1	1	1	1	1
GC_00000887	1	1	1	1	1	1	1	0	1	1	1	1	1	1	1	1	1	1	1	1	1	1	1	1	1	1	1	1	1	1	1	1	1	1	1	1	1	1	1	1	1	1	1	1	1	1	1	1	1
GC_00000888	1	1	1	1	1	1	1	1	1	1	1	1	1	1	1	1	1	1	1	1	1	1	1	1	1	1	1	1	1	1	1	1	1	1	1	1	1	1	1	1	1	1	1	1	1	1	1	1	1
GC_00000889	1	1	1	1	1	1	1	1	1	1	1	1	1	1	1	1	1	1	1	1	1	1	1	1	1	1	1	1	1	1	1	1	1	1	0	1	1	1	1	1	1	1	1	1	1	1	1	1	1
GC_00000890	1	1	1	1	1	1	1	1	1	1	1	1	1	1	1	1	1	1	1	1	1	1	1	1	1	1	1	1	1	1	1	1	1	1	1	1	1	1	1	1	1	1	1	1	1	1	1	1	1
GC_00000891	1	1	1	1	1	1	1	1	1	1	1	1	0	1	1	1	1	1	1	1	1	1	1	1	1	1	1	1	1	1	1	1	1	1	1	1	1	1	1	1	1	1	1	1	1	1	1	1	1
GC_00000892	1	1	1	1	1	1	1	0	1	1	1	1	1	1	1	1	1	1	1	1	1	1	1	1	1	1	1	1	1	1	1	1	1	1	1	1	1	1	1	1	1	1	1	1	1	1	1	1	1
GC_00000893	1	1	1	1	1	1	1	1	1	1	1	1	1	1	1	1	1	1	1	1	1	1	1	1	1	1	1	1	1	1	1	1	1	1	1	1	1	1	1	1	1	1	1	1	1	1	1	1	1
GC_00000894	1	1	1	0	1	1	1	1	1	1	1	1	1	1	1	1	1	1	1	1	1	1	1	1	1	1	1	1	1	1	1	1	1	1	1	1	1	1	1	1	1	1	1	1	1	1	1	1	1
GC_00000895	1	1	1	1	0	1	1	1	1	1	1	1	1	1	1	1	1	1	1	1	1	1	1	1	1	1	1	1	1	1	1	1	1	1	1	1	1	1	1	1	1	1	1	1	1	1	1	1	1
GC_00000896	1	0	1	1	1	1	1	1	1	1	1	1	1	1	1	1	1	1	1	1	1	1	1	1	1	1	1	1	1	1	1	1	1	1	1	1	1	1	1	1	1	1	1	1	1	1	1	1	1
GC_00000897	0	0	0	0	0	0	1	0	1	0	1	0	1	1	1	1	1	0	1	0	1	1	0	1	1	1	1	1	1	1	1	1	1	0	1	0	0	0	0	0	0	0	0	1	1	1	1	1	1
GC_00000898	0	0	0	0	0	0	0	0	1	0	1	0	0	1	1	1	1	0	1	0	1	1	0	1	1	1	1	1	1	1	1	1	1	0	1	0	0	0	0	0	0	0	0	1	1	1	1	1	1
GC_00000899	1	1	1	1	0	1	1	1	1	0	1	1	1	1	1	1	1	1	1	0	1	1	0	1	1	1	1	1	1	1	1	1	1	1	1	0	0	0	0	0	0	0	0	1	1	1	1	1	1
GC_00000900	1	1	1	1	0	1	1	1	1	0	1	1	1	1	1	1	1	1	1	1	1	1	1	1	1	1	1	1	1	1	1	1	0	0	1	1	1	1	1	1	1	0	0	1	1	1	1	1	1
GC_00000901	1	1	1	1	1	1	1	1	1	1	1	1	1	1	1	1	1	1	1	1	1	1	1	1	1	1	1	1	1	1	0	1	1	1	1	1	1	1	1	1	1	1	1	1	1	1	1	1	1
GC_00000902	1	0	1	1	1	1	1	1	1	1	1	1	1	1	1	1	1	1	1	1	1	1	1	1	1	1	1	1	1	1	1	1	1	1	1	1	1	1	1	1	1	1	1	1	1	1	1	1	1
GC_00000903	0	1	1	1	0	1	1	0	1	0	1	1	1	1	1	1	1	1	1	0	1	1	0	1	1	1	1	1	0	1	1	1	1	1	1	0	0	0	0	0	0	0	0	1	1	1	1	1	1
GC_00000904	1	1	1	0	1	1	0	1	1	1	1	1	1	1	1	1	1	1	0	1	1	1	1	1	1	1	1	1	1	1	1	1	1	1	1	1	1	1	1	1	1	1	1	1	1	1	1	1	0
GC_00000905	0	1	0	1	0	0	1	1	1	1	1	1	1	1	1	1	1	1	1	1	1	1	1	1	1	1	1	1	1	1	1	1	1	1	1	1	1	1	1	1	1	1	1	1	1	1	1	1	1
GC_00000906	0	1	0	1	1	1	1	1	1	1	1	1	1	1	1	1	1	1	1	1	1	1	1	1	1	1	1	1	1	1	1	1	1	0	1	1	1	1	1	1	1	1	1	1	1	1	1	1	1
GC_00000907	1	1	1	0	1	1	1	0	1	1	1	1	1	1	1	1	1	1	1	1	1	1	1	1	1	1	1	1	1	1	1	1	1	1	1	1	1	1	1	1	1	1	1	1	1	1	1	1	1
GC_00000908	1	1	1	1	0	1	1	1	1	0	1	1	0	1	1	1	1	1	1	0	1	1	0	1	1	1	1	1	1	1	1	1	1	0	1	0	0	0	0	0	0	0	0	1	1	1	1	1	1
GC_00000909	0	1	1	1	1	1	1	0	1	1	1	1	1	1	1	1	1	1	1	1	1	1	1	1	1	1	1	1	1	1	1	1	1	1	1	1	1	1	1	1	1	1	1	1	1	1	1	1	1
GC_00000910	1	1	1	1	1	1	1	1	1	0	1	1	0	1	1	1	1	1	1	0	1	1	0	1	1	1	1	1	1	1	1	1	1	1	1	0	0	0	0	0	0	0	0	1	1	1	1	1	1
GC_00000911	1	0	1	0	0	1	0	1	1	0	0	0	0	1	1	0	1	0	1	0	1	1	0	1	1	1	1	1	1	1	1	1	1	1	0	0	0	0	0	0	0	0	0	1	1	1	1	1	1
GC_00000912	1	1	1	1	1	1	1	0	1	0	1	1	1	1	1	1	1	1	1	0	1	1	0	1	1	1	1	1	1	1	1	1	1	1	1	0	0	0	0	0	0	0	0	1	1	1	1	1	1
GC_00000913	1	1	1	0	0	1	1	0	1	1	1	0	1	1	1	1	1	0	1	1	1	1	1	1	1	1	1	1	1	1	1	1	1	0	1	1	1	1	1	1	1	1	1	1	1	1	1	1	1
GC_00000914	0	0	0	1	0	0	1	1	1	0	1	0	0	1	1	1	1	0	1	0	1	1	0	1	1	1	1	1	0	1	1	0	1	0	1	0	0	0	0	0	0	0	0	1	1	1	1	1	1
GC_00000915	1	0	1	0	0	1	1	0	1	1	1	1	1	1	1	1	1	1	1	0	1	1	0	1	1	1	1	1	1	1	1	1	1	1	1	0	0	0	0	0	0	1	1	1	1	1	1	1	1
GC_00000916	1	1	1	1	1	1	1	0	1	1	1	1	1	1	1	1	1	1	1	1	1	1	1	1	1	1	1	1	1	1	1	1	1	1	1	1	1	1	1	1	1	1	1	1	1	1	1	1	1
GC_00000917	0	0	0	1	0	0	1	1	1	0	1	0	0	1	1	1	1	0	1	0	1	1	0	1	1	1	1	1	1	1	1	1	1	0	1	0	0	0	0	0	0	0	0	1	1	1	1	1	1
GC_00000918	0	0	0	0	0	0	0	0	1	0	0	0	0	1	1	0	1	0	1	0	1	1	0	1	1	1	1	1	1	1	1	1	1	0	0	0	0	0	0	0	0	0	0	1	1	1	1	1	1
GC_00000919	0	0	0	1	0	0	1	1	1	1	1	0	1	1	1	1	1	0	1	1	1	1	1	1	1	1	1	1	1	1	1	1	1	0	1	1	1	1	1	1	1	1	1	1	1	1	1	1	1
GC_00000920	1	1	1	1	1	1	1	1	1	1	1	1	0	1	0	1	0	1	1	1	1	0	1	1	1	0	0	1	1	1	1	1	0	1	0	1	1	1	1	1	1	1	1	1	0	0	0	0	1
GC_00000921	1	1	1	1	1	1	1	1	1	0	1	1	0	1	0	1	0	1	1	0	1	1	0	1	1	1	1	1	1	1	1	1	0	1	1	0	0	0	0	0	0	0	0	1	1	0	0	1	1
GC_00000922	1	1	1	0	0	1	1	0	1	0	0	1	0	1	1	0	1	1	1	0	1	1	0	1	1	1	1	1	1	1	1	1	1	1	0	0	0	0	0	0	0	0	0	1	1	1	1	1	1
GC_00000923	0	0	0	1	0	0	0	0	0	0	1	0	0	0	1	0	1	0	0	0	1	1	0	0	1	1	1	1	1	1	1	1	1	0	1	0	0	0	0	0	0	0	0	1	1	1	1	1	0
GC_00000924	0	0	0	0	0	0	0	0	1	0	0	0	0	1	1	0	1	0	1	0	1	1	0	1	1	1	1	1	0	1	1	1	1	0	0	0	0	0	0	0	0	0	0	1	1	1	1	1	1
GC_00000925	1	1	1	1	0	1	1	1	1	0	1	1	1	1	1	1	1	1	1	0	1	1	0	1	1	1	1	1	1	1	1	1	1	1	1	0	0	0	0	0	0	0	0	1	1	1	1	1	1
GC_00000926	1	1	1	1	0	1	1	1	1	0	1	1	1	1	1	1	1	1	1	0	1	1	0	1	1	1	1	1	1	1	1	1	1	1	1	0	0	0	0	0	0	0	0	1	1	1	1	1	1
GC_00000927	1	1	1	0	1	1	1	0	1	1	1	1	1	1	1	0	1	1	1	0	1	1	0	1	1	1	1	1	1	1	1	1	1	1	0	0	0	0	0	0	0	1	1	1	1	1	1	1	1
GC_00000928	1	1	1	0	1	1	0	1	1	1	0	1	0	1	1	1	1	1	0	1	1	1	1	1	1	1	1	1	1	1	1	1	1	1	1	1	1	1	1	1	1	1	1	1	1	1	1	1	1
GC_00000929	1	0	0	1	0	0	0	1	1	0	1	1	1	1	1	0	1	1	1	0	1	1	0	1	1	1	1	1	0	1	1	1	1	0	1	0	0	0	0	0	0	0	0	1	1	1	1	1	1
GC_00000930	0	0	0	1	0	0	0	1	1	0	1	0	0	1	1	0	1	0	1	0	1	1	0	1	1	1	1	1	1	1	1	1	1	0	0	0	0	0	0	0	0	0	0	1	1	1	1	1	1
GC_00000931	0	1	0	1	0	1	1	1	1	1	1	1	0	1	1	1	1	1	1	1	1	1	1	1	1	1	1	1	0	1	1	1	1	1	1	1	1	1	1	1	1	1	1	1	1	1	1	1	1
GC_00000932	0	0	0	0	0	0	1	0	1	0	0	0	1	1	1	1	1	0	1	0	1	1	0	1	1	1	1	1	1	1	1	1	1	0	0	0	0	0	0	0	0	0	0	1	1	1	1	1	1
GC_00000933	0	0	1	0	0	1	0	0	1	0	0	1	0	1	1	0	1	1	1	0	1	1	0	1	1	1	1	1	1	1	1	1	1	0	0	0	0	0	0	0	0	0	0	1	1	1	1	1	1
GC_00000934	0	1	1	1	0	1	1	0	1	0	1	1	0	1	1	1	1	1	1	1	1	1	1	1	1	1	1	1	1	1	1	1	1	1	1	1	1	1	1	1	1	0	0	1	1	1	1	1	1
GC_00000935	0	0	0	1	0	0	0	0	1	0	1	0	0	1	1	1	1	0	1	0	1	1	0	1	1	1	1	1	1	1	1	1	1	0	1	0	0	0	0	0	0	0	0	1	1	1	1	1	1
GC_00000936	0	0	0	1	0	0	1	1	1	1	1	0	1	1	1	1	1	0	1	1	1	1	1	1	1	1	1	1	1	1	1	1	1	0	1	1	1	1	1	1	1	1	1	1	1	1	1	1	1
GC_00000937	1	1	1	1	1	1	1	1	0	0	1	1	0	0	0	0	0	1	0	0	0	1	0	1	1	1	1	1	1	0	1	1	1	1	0	0	0	0	0	0	0	0	0	1	0	0	0	0	0
GC_00000938	1	1	1	1	0	1	1	1	1	0	1	1	1	1	1	1	1	1	1	0	1	1	0	1	1	1	1	1	1	1	1	1	0	0	1	0	0	0	0	0	0	0	0	1	1	1	1	1	1
GC_00000939	0	1	1	1	1	1	1	1	1	1	1	1	1	1	1	1	1	1	0	1	1	1	1	1	1	1	1	1	1	1	1	1	1	1	1	1	0	0	1	0	1	1	1	1	1	1	1	1	1
GC_00000940	0	0	0	1	0	0	1	1	1	1	1	0	1	1	1	1	1	0	1	1	1	1	1	1	1	1	1	1	1	1	1	1	1	1	1	1	1	1	1	1	1	1	1	1	1	1	1	1	1
GC_00000941	0	1	0	0	0	0	1	0	1	0	1	1	0	1	1	0	1	1	1	0	1	1	0	1	1	1	1	1	1	1	1	1	1	1	1	0	0	0	0	0	0	0	0	1	1	1	1	1	1
GC_00000942	1	1	1	0	0	1	1	0	1	0	1	1	0	1	1	1	1	1	0	0	1	1	0	1	1	1	1	1	1	1	0	1	1	1	1	0	0	0	0	0	0	0	0	1	1	1	1	1	1
GC_00000943	0	0	0	0	0	0	0	1	0	0	0	0	0	0	0	0	0	0	0	0	0	0	0	0	0	0	0	0	0	0	0	0	0	0	0	0	0	0	0	0	0	0	0	0	0	0	0	0	0
GC_00000944	1	1	1	0	1	1	0	0	0	1	1	1	1	1	1	0	1	1	1	1	1	1	1	1	1	1	1	1	0	0	1	1	1	1	1	1	1	1	1	1	1	1	1	1	1	1	1	1	1
GC_00000945	1	1	0	1	1	0	0	1	1	0	1	1	0	1	1	1	1	1	1	0	1	1	0	1	1	1	1	1	1	1	1	1	1	1	1	0	0	0	0	0	0	0	0	1	1	1	1	1	1
GC_00000946	0	0	0	1	0	0	1	0	1	0	1	0	1	1	1	0	1	0	1	0	1	1	0	1	1	1	1	1	1	1	1	1	1	0	0	0	0	0	0	0	0	0	0	1	1	1	1	1	1
GC_00000947	1	1	1	1	1	1	1	1	1	0	1	1	1	0	1	0	1	1	1	0	1	1	0	1	1	1	1	1	1	1	0	1	1	1	1	0	0	0	0	0	0	0	0	1	1	1	1	1	1
GC_00000948	0	0	0	0	0	0	0	0	1	0	0	0	0	1	1	0	1	0	1	0	1	1	0	0	1	1	1	1	0	1	1	0	1	0	0	0	0	0	0	0	0	0	0	0	1	1	1	1	1
GC_00000949	1	1	1	1	1	1	1	0	1	0	1	1	1	1	1	1	1	1	1	0	1	1	0	1	1	1	1	1	1	1	1	1	1	1	1	0	0	0	0	0	0	0	0	1	1	1	1	1	1
GC_00000950	1	1	1	1	0	1	1	1	1	0	1	0	0	1	1	1	1	0	1	0	0	1	0	1	1	1	0	1	1	1	1	1	0	0	1	0	0	0	0	0	0	0	0	1	1	1	1	1	0
GC_00000951	1	1	0	1	1	0	1	0	1	0	1	1	0	0	1	1	1	1	1	0	1	1	0	1	1	1	1	1	1	1	1	1	1	0	1	0	0	0	0	0	0	0	0	1	1	1	1	1	0
GC_00000952	1	1	1	0	1	1	1	0	1	0	0	1	1	1	1	0	1	1	1	0	1	1	0	1	1	1	1	1	0	1	1	1	1	1	0	0	0	0	0	0	0	0	0	1	1	1	1	1	1
GC_00000953	0	0	0	1	0	0	1	1	1	0	1	0	1	1	1	1	1	0	1	1	1	1	1	1	1	1	1	1	1	1	1	1	1	0	1	1	1	1	1	1	1	0	0	1	1	1	1	1	1
GC_00000954	0	0	0	0	0	0	0	0	1	0	1	0	0	1	1	0	1	0	1	0	1	1	0	1	1	1	1	1	0	1	1	1	1	0	0	0	0	0	0	0	0	0	0	1	1	1	1	1	1
GC_00000955	1	1	1	1	0	1	1	0	1	0	1	1	0	1	1	0	1	1	1	0	1	1	0	1	1	1	1	1	1	1	1	1	1	1	1	0	0	0	0	0	0	0	0	1	1	1	1	1	1
GC_00000956	1	0	0	1	0	0	1	0	0	0	0	0	0	0	1	1	1	0	0	0	0	0	0	0	0	0	0	0	1	0	0	0	0	0	0	0	0	0	0	0	0	0	0	0	1	1	1	1	0
GC_00000957	0	0	0	1	0	0	1	1	1	1	1	0	1	1	1	1	1	0	1	1	1	1	1	1	1	1	1	1	1	1	1	1	1	0	1	1	1	1	1	1	1	1	1	1	1	1	1	1	1
GC_00000958	0	0	0	1	0	0	1	0	1	0	0	0	0	1	1	0	1	0	1	0	1	1	0	1	1	1	0	1	1	1	1	1	1	0	0	0	0	0	0	0	0	0	0	1	1	1	1	1	1
GC_00000959	1	1	1	1	0	1	1	1	1	0	1	1	1	0	1	1	1	1	1	0	1	1	0	1	1	1	1	1	1	1	1	1	1	1	1	0	0	0	0	0	0	0	0	1	1	1	1	1	0
GC_00000960	0	0	0	1	0	0	1	1	1	0	1	0	1	1	1	0	1	0	1	0	1	1	0	1	1	1	1	1	1	1	1	1	1	0	1	0	0	0	0	0	0	0	0	1	1	1	1	1	1
GC_00000961	1	1	1	0	1	1	1	1	1	0	1	1	1	1	1	1	1	1	1	0	1	1	0	1	1	1	1	1	1	1	1	1	1	0	1	0	0	0	0	0	0	0	0	1	1	1	1	1	1
GC_00000962	1	1	1	1	0	1	1	1	1	0	1	1	1	1	1	1	1	1	1	0	1	1	0	1	1	1	1	1	1	1	1	1	1	1	1	0	0	0	0	0	0	0	0	1	1	1	1	1	1
GC_00000963	0	0	0	0	0	0	0	0	1	1	1	0	1	1	1	0	1	0	0	1	1	1	1	1	1	1	1	1	1	1	1	1	1	0	0	1	1	1	1	1	1	1	1	1	1	1	1	1	1
GC_00000964	1	0	0	0	0	0	1	1	1	0	1	0	1	1	1	1	1	1	1	0	1	1	0	1	1	1	1	1	1	1	1	1	1	0	1	0	0	0	0	0	0	0	0	1	1	1	1	1	1
GC_00000965	1	1	1	1	0	1	1	1	1	1	1	1	0	0	1	0	1	1	1	1	0	1	1	1	1	1	0	1	1	1	1	1	1	0	0	1	1	1	1	1	1	1	1	1	1	1	1	1	1
GC_00000966	0	0	0	1	0	0	1	1	1	1	1	0	1	1	1	1	1	0	1	1	1	1	1	1	1	1	1	1	1	1	1	1	1	0	1	1	1	1	1	1	1	1	1	1	1	1	1	1	0
GC_00000967	0	0	0	0	0	0	1	0	1	0	1	0	0	1	1	0	1	0	1	0	1	1	0	1	1	1	1	1	0	1	1	1	1	0	1	0	0	0	0	0	0	0	0	1	1	1	1	1	1
GC_00000968	1	1	1	1	0	1	1	1	1	0	1	1	1	1	1	1	1	1	1	0	1	1	0	1	1	1	1	1	1	1	1	1	1	1	1	0	0	0	0	0	0	0	0	1	1	1	1	1	1
GC_00000969	0	0	1	1	0	1	1	0	1	0	1	0	1	1	1	1	1	0	0	0	1	1	0	1	1	1	1	1	1	0	1	1	1	0	0	0	0	0	0	0	0	0	0	1	1	1	1	1	1
GC_00000970	0	1	0	1	1	0	0	0	1	0	1	1	0	1	1	1	1	1	1	0	1	1	0	1	1	1	1	1	1	1	1	1	1	0	1	0	0	0	0	0	0	0	0	1	1	1	1	1	1
GC_00000971	0	0	0	1	0	0	0	0	0	0	1	0	0	1	1	0	1	0	1	0	1	1	0	1	1	1	1	1	1	0	1	1	1	0	0	0	0	0	0	0	0	0	0	1	1	1	1	1	1
GC_00000972	0	0	0	1	0	0	0	0	0	0	1	0	0	1	1	0	1	0	1	0	0	0	0	1	1	0	0	1	0	0	0	1	0	0	0	0	0	0	0	0	0	0	0	1	1	1	1	1	0
GC_00000973	0	0	0	0	0	0	1	1	1	1	1	0	1	1	1	1	1	0	1	1	1	1	1	1	1	1	1	1	1	1	1	1	1	0	1	1	1	1	1	1	1	1	1	1	1	1	1	1	1
GC_00000974	0	1	1	1	0	1	1	1	1	1	1	1	1	1	1	1	1	1	1	0	1	1	0	1	1	1	1	1	1	1	1	1	1	1	1	0	0	0	0	0	0	1	1	1	1	1	1	1	1
GC_00000975	1	1	1	1	0	1	1	1	1	0	1	1	0	1	1	1	1	1	1	0	0	0	0	1	1	0	0	1	1	1	1	1	1	0	1	0	0	0	0	0	0	0	0	1	1	1	1	1	1
GC_00000976	1	1	1	0	0	1	0	0	1	0	0	1	0	1	0	0	0	1	1	0	1	1	0	1	1	1	1	1	0	1	1	1	1	0	0	0	0	0	0	0	0	0	0	1	0	0	0	0	1
GC_00000977	1	1	1	1	1	1	1	1	1	0	1	1	0	1	1	1	1	1	1	0	1	1	0	1	1	1	1	1	1	1	1	1	1	1	1	0	0	0	0	0	0	0	0	1	1	1	1	1	1
GC_00000978	0	0	0	0	1	0	0	0	0	0	0	0	0	0	0	0	0	0	0	0	0	0	0	0	0	0	0	0	0	0	0	0	0	0	0	0	0	0	0	0	0	0	0	0	0	0	0	0	0
GC_00000979	1	1	1	1	1	1	1	1	1	0	1	1	1	1	1	1	1	1	1	0	1	1	0	1	1	1	1	1	1	1	1	1	1	1	1	0	0	0	0	0	0	0	0	1	1	1	1	1	1
GC_00000980	1	1	1	0	0	1	1	1	1	0	1	1	0	1	1	1	1	1	1	0	1	1	0	1	1	1	1	1	1	1	1	1	1	0	1	0	0	0	0	0	0	0	0	1	1	1	1	1	1
GC_00000981	1	1	1	1	0	1	1	1	1	0	1	1	1	1	1	1	1	1	1	0	1	1	0	1	1	1	1	1	1	1	1	1	1	1	1	0	0	0	0	0	0	0	0	1	1	1	1	1	1
GC_00000982	1	1	1	0	1	1	1	0	0	0	1	1	0	1	0	0	0	1	0	0	0	0	0	0	0	0	0	0	1	0	0	0	0	0	1	0	0	0	0	0	0	0	0	0	0	0	0	0	1
GC_00000983	1	0	0	0	0	0	1	0	1	0	0	0	0	1	1	0	1	0	1	0	1	1	0	1	0	1	1	0	0	1	1	1	1	0	0	0	0	0	0	0	0	0	0	1	1	1	1	1	1
GC_00000984	0	0	1	0	0	1	1	0	1	1	1	0	0	1	1	1	1	0	0	1	1	1	1	1	1	1	1	1	1	1	0	1	1	0	1	1	1	1	1	1	1	1	1	1	1	1	1	1	1
GC_00000985	0	0	0	0	0	0	0	0	1	0	0	0	1	1	1	0	1	0	1	0	1	1	0	1	1	1	1	1	0	1	1	1	1	0	0	0	0	0	0	0	0	0	0	1	1	1	1	1	1
GC_00000986	1	0	1	0	0	1	1	1	1	0	1	1	1	1	1	1	1	1	1	0	1	1	0	1	1	1	1	1	1	1	1	1	1	1	1	0	0	0	0	0	0	0	0	1	1	1	1	1	1
GC_00000987	1	1	1	0	0	1	0	0	1	1	0	1	0	1	1	0	1	1	1	1	1	1	1	1	1	1	1	1	0	1	1	1	1	0	0	1	1	1	1	1	1	1	1	1	1	1	1	1	1
GC_00000988	0	0	0	1	0	0	1	0	0	0	1	0	0	1	1	0	1	0	1	0	1	1	0	1	1	1	1	1	1	0	1	1	1	0	1	0	0	0	0	0	0	0	0	1	1	1	1	1	1
GC_00000989	1	1	1	1	1	1	1	1	1	0	1	1	1	1	1	1	1	1	1	0	1	1	0	1	1	1	1	1	1	1	1	1	1	1	1	0	0	0	0	0	0	0	0	1	1	1	1	1	1
GC_00000990	0	1	0	1	0	0	1	0	0	0	1	1	1	1	0	0	0	1	0	0	0	0	0	0	0	0	0	0	1	0	0	0	0	0	0	0	0	0	0	0	0	0	0	0	0	0	0	0	0
GC_00000991	1	1	1	1	0	1	1	1	1	0	1	1	1	1	1	0	1	1	1	0	1	1	0	1	1	1	1	1	1	1	1	1	1	1	1	0	0	0	0	0	0	0	0	1	1	1	1	1	1
GC_00000992	1	1	1	1	1	1	1	0	1	0	1	1	1	1	1	1	1	1	1	0	1	1	0	1	1	1	1	1	1	1	1	1	1	1	1	0	0	0	0	0	0	0	0	1	1	1	1	1	1
GC_00000993	0	1	1	0	1	1	1	1	1	0	1	1	1	1	1	1	1	1	1	0	1	1	0	1	1	1	1	1	1	1	1	1	1	0	1	0	0	0	0	0	0	0	0	1	1	1	1	1	1
GC_00000994	0	0	0	1	0	0	1	0	1	0	1	0	0	1	1	0	1	0	0	0	1	1	0	1	1	1	1	1	1	1	1	1	1	0	1	0	0	0	0	0	0	0	0	1	1	1	1	1	1
GC_00000995	0	0	0	0	0	0	0	0	1	0	1	0	0	1	1	0	1	0	1	0	1	1	0	1	1	1	1	1	0	1	1	1	1	0	0	0	0	0	0	0	0	0	0	1	1	1	1	1	1
GC_00000996	1	1	1	0	0	1	1	1	1	0	1	1	0	1	1	1	1	1	1	0	1	1	0	1	1	1	1	1	0	1	1	1	1	0	0	0	0	0	0	0	0	0	0	1	1	1	1	1	1
GC_00000997	0	0	0	1	0	0	1	1	1	0	1	0	1	0	1	0	1	0	1	0	1	1	0	1	1	1	1	1	0	1	1	1	1	0	0	0	0	0	0	0	0	0	0	1	1	1	1	1	1
GC_00000998	0	0	0	0	0	0	0	0	1	0	0	0	0	1	1	0	1	0	1	0	1	1	0	1	1	1	1	1	1	1	1	1	1	0	0	0	0	0	0	0	0	0	0	1	1	1	1	1	1
GC_00000999	0	0	0	0	0	0	0	0	1	0	0	0	0	1	1	0	1	0	0	0	1	1	0	0	1	1	1	1	0	1	1	1	1	0	1	0	0	0	0	0	0	0	0	0	1	1	1	1	1
GC_00001000	0	0	0	0	0	0	0	0	0	0	1	0	0	1	0	0	0	0	0	0	0	0	0	0	0	0	0	0	1	0	0	0	0	0	0	0	0	0	0	0	0	0	0	0	0	0	0	0	0
GC_00001001	0	1	1	0	0	1	1	1	1	0	0	0	1	1	1	1	1	0	1	0	1	1	0	1	1	1	1	1	1	1	1	1	1	0	1	0	0	0	0	0	0	0	0	1	1	1	1	1	1
GC_00001002	1	1	1	1	1	1	0	0	1	0	1	1	0	1	0	0	0	1	1	0	1	1	0	1	1	1	1	1	0	1	1	1	1	0	0	0	0	0	0	0	0	0	0	1	0	0	0	0	1
GC_00001003	0	0	1	0	0	0	1	0	1	0	1	0	0	1	0	0	0	0	1	0	0	1	0	1	1	1	1	1	1	0	1	1	1	0	0	0	0	0	0	0	0	0	0	1	0	0	0	0	1
GC_00001004	0	1	1	1	0	1	1	1	1	0	1	1	0	1	1	1	1	1	1	0	1	1	0	1	1	1	1	1	1	1	1	1	1	1	1	0	0	0	0	0	0	0	0	1	1	1	1	1	1
GC_00001005	1	0	1	0	0	1	1	0	1	0	1	0	0	1	1	1	1	0	1	0	1	1	0	1	1	1	1	1	1	1	1	1	1	1	1	0	0	0	0	0	0	0	0	1	1	1	1	1	1
GC_00001006	1	1	1	0	1	1	1	0	1	0	1	1	1	1	1	1	1	1	1	0	1	1	0	1	1	1	1	1	0	1	1	1	1	1	1	0	0	0	0	0	0	0	0	1	1	1	1	1	1
GC_00001007	1	1	1	1	0	1	1	1	1	0	1	1	0	1	1	0	1	1	1	0	1	1	0	1	1	1	1	1	1	1	1	1	1	0	1	0	0	0	0	0	0	0	0	1	1	1	1	1	0
GC_00001008	1	1	1	0	1	1	0	0	1	0	0	1	0	1	1	1	1	1	1	0	1	1	0	1	1	1	1	1	1	1	1	1	1	1	1	0	0	0	0	0	0	0	0	1	1	1	1	1	1
GC_00001009	0	0	0	0	0	0	0	0	1	0	0	0	0	1	1	0	1	0	1	0	1	1	0	1	1	0	1	1	0	1	1	1	1	0	0	0	0	0	0	0	0	0	0	1	1	1	1	1	1
GC_00001010	1	0	1	1	1	1	1	1	1	0	1	1	0	0	1	1	1	1	1	0	1	1	0	1	1	1	1	1	1	1	1	1	1	0	1	0	0	0	0	0	0	0	0	1	1	1	1	1	0
GC_00001011	0	0	1	0	0	1	0	0	1	0	1	1	0	1	1	1	1	1	1	0	1	1	0	1	1	1	1	1	1	1	1	1	1	1	1	0	0	0	0	0	0	0	0	1	1	1	1	1	1
GC_00001012	0	0	0	0	0	0	0	0	0	0	0	0	0	0	0	0	0	0	0	0	0	0	0	0	0	0	0	0	0	0	0	0	0	0	0	0	0	0	0	0	0	0	0	0	0	0	0	0	0
GC_00001013	0	1	0	0	1	0	1	1	1	0	1	1	0	1	1	0	1	1	1	0	0	1	0	1	1	1	0	1	1	1	1	1	1	1	1	0	0	0	0	0	0	0	0	1	1	1	1	1	1
GC_00001014	0	0	0	1	0	0	1	1	1	0	1	0	1	1	1	1	1	0	1	0	1	1	0	1	1	1	1	1	1	1	1	1	1	0	1	0	0	0	0	0	0	0	0	1	1	1	1	1	1
GC_00001015	0	1	0	1	0	0	1	0	0	0	0	1	0	1	0	0	0	1	0	0	0	0	0	0	0	0	0	0	0	0	0	0	0	0	0	0	0	0	0	0	0	0	0	0	0	0	0	0	0
GC_00001016	0	1	0	0	0	0	0	0	0	0	1	0	0	1	0	0	0	0	0	0	0	0	0	0	0	0	0	0	1	0	0	0	0	0	1	0	0	0	0	0	0	0	0	0	0	0	0	0	1
GC_00001017	1	1	0	1	0	0	1	0	1	0	1	1	0	1	1	1	1	1	1	0	1	1	0	1	1	1	1	1	1	1	1	1	1	1	1	0	0	0	0	0	0	0	0	1	1	1	1	1	1
GC_00001018	0	0	0	1	0	0	1	1	1	0	1	0	0	1	1	1	1	0	1	0	1	1	0	1	1	1	1	1	1	1	1	1	1	0	1	0	0	0	0	0	0	0	0	1	1	1	1	1	1
GC_00001019	0	0	0	1	0	0	1	1	1	0	1	0	1	1	1	1	1	0	1	0	1	1	0	1	1	1	1	1	1	1	1	1	1	0	1	0	0	0	0	0	0	0	0	1	1	1	1	1	1
GC_00001020	0	0	0	1	0	0	0	1	1	1	0	0	0	1	1	0	1	0	1	1	1	1	1	1	1	1	1	1	1	1	1	1	1	0	0	1	1	1	1	1	1	1	1	1	1	1	1	1	1
GC_00001021	1	1	0	0	0	0	0	0	1	0	1	1	0	1	1	1	1	1	1	0	1	1	0	1	1	1	1	1	0	1	1	1	1	0	0	0	0	0	0	0	0	0	0	1	1	1	1	1	1
GC_00001022	0	1	0	1	0	0	1	1	1	0	0	1	0	1	1	1	1	1	1	0	1	1	0	1	1	1	1	1	0	1	1	1	1	1	1	0	0	0	0	0	0	0	0	1	1	1	1	1	1
GC_00001023	0	0	0	0	0	0	1	1	1	0	0	0	1	1	1	0	1	0	1	0	1	1	0	1	1	1	1	1	1	1	1	0	1	0	0	0	0	0	0	0	0	0	0	1	1	1	1	1	1
GC_00001024	0	0	0	0	0	0	0	0	1	0	1	0	0	0	0	1	0	0	1	0	1	0	0	0	1	0	1	1	1	1	1	1	1	0	0	0	0	0	0	0	0	0	0	0	0	0	0	0	0
GC_00001025	0	1	0	0	0	0	0	1	1	0	0	1	1	1	1	0	1	1	1	0	1	1	0	1	1	1	1	1	1	1	1	1	1	0	0	0	0	0	0	0	0	0	0	1	1	1	1	1	1
GC_00001026	0	0	0	1	0	0	0	0	0	0	1	0	0	1	1	1	1	0	1	0	1	1	0	1	1	1	1	1	0	0	1	1	0	0	1	0	0	0	0	0	0	0	0	1	1	1	1	1	1
GC_00001027	0	0	0	1	0	0	1	1	1	0	1	0	1	1	1	1	1	0	1	0	1	1	0	1	1	1	1	1	1	1	1	1	1	0	1	0	0	0	0	0	0	0	0	1	1	1	1	1	1
GC_00001028	1	1	1	0	1	1	0	1	1	0	0	1	0	1	1	0	1	1	1	0	1	1	0	0	1	1	1	1	0	1	1	0	1	1	1	0	0	0	0	0	0	0	0	1	1	1	1	1	1
GC_00001029	0	0	0	1	0	0	1	1	1	0	1	0	1	1	1	1	1	0	1	0	1	1	0	1	1	1	1	1	1	1	1	1	1	0	1	0	0	0	0	0	0	0	0	1	1	1	1	1	1
GC_00001030	0	0	0	0	0	0	0	0	1	0	0	0	1	1	1	0	1	0	1	0	1	1	0	1	1	1	1	1	1	1	1	1	1	0	0	0	0	0	0	0	0	0	0	1	1	1	1	1	1
GC_00001031	0	1	0	1	0	0	0	1	0	0	0	0	0	0	0	0	0	0	0	0	0	0	0	0	0	0	0	0	0	0	0	0	0	0	0	0	0	0	0	0	0	0	0	0	0	0	0	0	0
GC_00001032	1	1	0	0	0	0	0	0	1	0	1	0	0	1	1	1	1	0	1	0	1	1	0	1	1	1	1	1	0	1	1	1	1	0	1	0	0	0	0	0	0	0	0	0	1	1	1	1	1
GC_00001033	0	0	0	1	0	0	1	0	1	0	1	0	0	1	1	1	1	0	1	0	1	1	0	0	1	1	1	1	1	1	1	1	0	0	1	0	0	0	0	0	0	0	0	1	1	1	1	1	1
GC_00001034	1	1	0	1	1	0	0	0	1	0	1	1	0	0	1	1	1	1	1	0	1	1	0	1	1	1	1	1	1	1	1	1	1	1	1	0	0	0	0	0	0	0	0	1	1	1	1	1	0
GC_00001035	0	0	0	0	0	0	0	0	1	0	0	0	0	1	1	0	1	0	0	0	1	1	0	1	1	1	1	1	1	1	1	1	1	0	0	0	0	0	0	0	0	0	0	1	1	1	1	1	1
GC_00001036	0	1	0	1	1	0	1	1	1	0	1	0	0	1	1	0	1	0	1	0	1	1	0	1	1	1	1	1	1	1	1	0	1	0	1	0	0	0	0	0	0	0	0	1	1	1	1	1	1
GC_00001037	0	0	0	0	0	0	0	0	1	0	0	0	1	1	1	0	1	0	1	0	1	1	0	1	1	1	1	1	0	1	1	1	1	0	0	0	0	0	0	0	0	0	0	1	1	1	1	1	1
GC_00001038	1	1	1	0	1	1	0	0	1	0	0	1	0	1	1	0	1	1	1	0	1	1	0	1	1	1	1	1	1	1	1	1	1	1	1	0	0	0	0	0	0	0	0	1	1	1	1	1	1
GC_00001039	0	0	0	0	1	0	0	0	1	0	0	1	1	1	1	1	1	1	1	0	1	1	0	1	1	1	1	1	1	1	1	1	1	1	1	0	0	0	0	0	0	0	0	1	1	1	1	1	1
GC_00001040	0	0	0	0	0	0	0	0	1	0	1	0	0	1	1	1	1	0	1	0	1	1	0	1	1	1	1	1	0	1	1	1	1	0	1	0	0	0	0	0	0	0	0	1	1	1	1	1	1
GC_00001041	0	0	0	1	0	0	1	1	1	0	1	0	1	1	1	1	1	0	0	0	1	1	0	1	1	0	0	1	1	0	0	0	1	0	1	0	0	0	0	0	0	0	0	1	1	1	1	1	1
GC_00001042	0	1	0	0	0	0	0	0	1	0	1	1	1	0	1	0	1	1	0	0	0	1	0	1	1	1	1	1	1	1	1	1	1	0	1	0	0	0	0	0	0	0	0	1	1	1	1	1	0
GC_00001043	0	0	0	1	0	0	1	1	1	0	1	0	1	1	1	1	1	0	1	0	1	1	0	1	1	1	1	1	1	1	1	1	1	0	1	0	0	0	0	0	0	0	0	1	1	1	1	1	1
GC_00001044	1	1	1	0	0	1	0	1	0	1	0	1	1	0	0	1	0	1	0	1	0	0	1	0	0	0	1	0	1	1	1	0	1	1	1	1	1	1	1	1	1	1	1	0	0	0	0	0	0
GC_00001045	0	1	0	0	0	0	1	0	0	0	0	1	0	1	0	0	0	1	1	0	0	0	0	0	0	0	0	0	0	0	0	0	0	0	0	0	0	0	0	0	0	0	0	0	0	0	0	0	0
GC_00001046	1	0	1	1	1	1	1	1	1	0	0	1	0	1	1	1	1	1	1	0	1	1	0	1	1	1	1	1	1	1	1	1	1	1	1	0	0	0	0	0	0	0	0	1	1	1	1	1	1
GC_00001047	0	0	0	0	0	0	0	0	1	0	0	0	0	1	1	0	1	0	1	0	1	1	0	1	1	1	1	1	0	1	1	1	1	0	0	0	0	0	0	0	0	0	0	1	1	1	1	1	1
GC_00001048	1	1	1	0	0	1	1	0	1	0	1	1	0	1	1	0	1	1	0	0	1	1	0	1	1	1	1	1	0	1	1	1	1	1	0	0	0	0	0	0	0	0	0	1	1	1	1	1	1
GC_00001049	1	1	1	0	0	1	0	1	1	0	1	1	0	1	1	0	1	1	1	0	1	1	0	1	1	1	1	1	0	1	1	1	1	1	0	0	0	0	0	0	0	0	0	1	1	1	1	1	1
GC_00001050	0	0	0	1	0	0	0	1	1	0	1	0	0	1	1	1	1	0	1	0	1	1	0	1	1	1	1	1	1	1	1	1	1	0	1	0	0	0	0	0	0	0	0	1	1	1	1	1	1
GC_00001051	1	1	0	1	0	0	1	0	1	0	1	1	0	1	0	1	0	1	0	0	1	1	0	1	1	1	1	1	1	0	1	1	1	0	0	0	0	0	0	0	0	0	0	1	0	0	0	0	1
GC_00001052	0	0	0	0	0	0	0	0	1	0	1	0	0	1	1	1	1	0	1	0	1	1	0	1	1	1	1	1	0	1	1	1	1	0	1	0	0	0	0	0	0	0	0	1	1	1	1	1	1
GC_00001053	0	0	0	0	0	0	0	0	0	0	0	0	0	1	1	0	1	0	1	0	1	1	0	1	1	1	1	1	0	0	0	1	0	0	0	0	0	0	0	0	0	0	0	1	1	1	1	1	1
GC_00001054	0	0	0	1	0	0	1	1	1	0	1	0	0	1	1	1	1	0	1	0	1	1	0	1	1	1	1	1	0	1	1	1	1	0	0	0	0	0	0	0	0	0	0	1	1	1	1	1	1
GC_00001055	0	0	0	0	0	0	0	0	1	0	0	0	0	1	1	0	1	0	1	0	1	1	0	1	1	1	1	1	0	1	1	1	1	0	0	0	0	0	0	0	0	0	0	1	1	1	1	1	1
GC_00001056	0	0	0	0	1	0	0	1	1	0	1	0	0	1	1	1	1	0	1	0	1	0	0	1	1	0	1	1	1	1	1	1	1	1	1	0	0	0	0	0	0	0	0	1	1	1	1	1	1
GC_00001057	1	1	1	0	0	1	0	0	1	0	1	0	0	1	1	0	1	0	1	0	1	1	0	0	1	1	1	1	1	1	1	1	1	1	0	0	0	0	0	0	0	0	0	0	1	1	1	1	1
GC_00001058	1	1	1	1	1	1	1	1	1	0	1	1	0	1	0	0	0	1	1	0	1	1	0	1	1	1	1	1	1	1	1	1	0	1	1	0	0	0	0	0	0	0	0	1	0	0	0	0	1
GC_00001059	0	0	0	1	0	0	1	1	1	0	1	0	0	1	0	1	0	0	1	0	1	1	0	1	1	1	1	1	1	1	1	1	1	0	1	0	0	0	0	0	0	0	0	1	0	0	0	0	1
GC_00001060	0	0	0	0	0	0	0	0	0	0	0	0	0	0	0	0	0	0	0	0	0	0	0	0	0	0	0	0	1	0	0	0	0	0	0	0	0	0	0	0	0	0	0	0	0	0	0	0	0
GC_00001061	0	0	0	1	0	0	0	0	0	0	0	0	0	0	0	0	0	0	0	0	0	0	0	0	0	0	0	0	0	0	0	0	0	0	0	0	0	0	0	0	0	0	0	0	0	0	0	0	0
GC_00001062	0	1	0	0	0	1	1	0	1	0	0	1	0	1	1	0	1	1	0	0	1	1	0	0	1	1	1	1	0	1	1	1	1	0	0	0	0	0	0	0	0	0	0	0	1	1	1	1	1
GC_00001063	0	0	0	0	0	0	0	0	1	0	0	0	0	1	1	0	0	0	1	0	1	1	0	1	1	1	1	1	0	1	1	1	1	0	0	0	0	0	0	0	0	0	0	1	1	1	1	1	1
GC_00001064	1	0	0	1	1	0	1	0	0	0	0	0	1	1	0	0	0	0	0	0	0	0	0	0	0	0	0	0	0	0	0	0	0	0	0	0	0	0	0	0	0	0	0	0	0	0	0	0	0
GC_00001065	1	1	1	1	0	1	0	0	1	0	1	1	0	1	1	1	1	1	0	0	1	1	0	1	1	1	1	1	1	1	1	1	1	0	1	0	0	0	0	0	0	0	0	1	1	1	1	1	1
GC_00001066	0	0	0	1	0	0	0	1	0	0	0	0	0	0	0	1	0	0	0	0	0	0	0	0	0	0	0	0	0	0	0	0	0	1	0	0	0	0	0	0	0	0	0	0	0	0	0	0	0
GC_00001067	0	1	0	1	0	0	1	1	0	0	0	1	1	1	0	0	0	1	0	0	0	0	0	0	0	0	0	0	1	0	0	0	0	0	0	0	0	0	0	0	0	0	0	0	0	0	0	0	0
GC_00001068	1	1	1	1	0	1	1	0	0	0	1	1	0	0	0	1	0	1	1	0	0	0	0	1	1	0	0	1	1	0	0	0	0	1	0	0	0	0	0	0	0	0	0	0	0	0	0	0	0
GC_00001069	0	0	0	1	0	0	0	0	1	0	1	0	0	1	1	0	1	0	1	0	1	1	0	1	1	1	1	1	1	1	1	1	1	0	0	0	0	0	0	0	0	0	0	1	1	1	1	1	1
GC_00001070	1	1	1	1	0	1	1	1	0	1	1	1	1	1	0	1	0	1	0	1	0	0	1	1	0	0	0	0	1	0	0	0	0	1	1	1	1	1	1	1	1	1	1	1	0	0	0	0	1
GC_00001071	0	1	0	1	0	0	1	0	1	0	1	1	0	1	1	1	1	1	1	0	1	0	0	1	1	0	0	1	1	1	1	0	0	1	0	0	0	0	0	0	0	0	0	1	1	1	1	1	1
GC_00001072	0	1	0	1	0	0	1	1	0	0	0	1	1	1	0	0	0	1	1	0	1	0	0	0	0	0	0	0	1	0	0	0	0	0	0	0	0	0	0	0	0	0	0	0	0	0	0	0	0
GC_00001073	0	0	0	1	0	0	1	0	1	0	1	0	1	1	1	1	1	0	1	0	1	1	0	1	1	1	1	1	1	1	1	1	0	0	1	0	0	0	0	0	0	0	0	1	1	1	1	1	1
GC_00001074	0	1	0	1	0	0	1	0	1	0	0	1	0	1	1	0	1	1	1	0	1	0	0	1	1	0	1	1	1	1	1	1	1	1	0	0	0	0	0	0	0	0	0	1	1	1	1	1	1
GC_00001075	1	0	0	0	1	0	1	1	1	0	1	1	0	1	1	0	1	1	1	0	1	1	0	1	1	1	1	1	1	1	1	1	1	1	0	0	0	0	0	0	0	0	0	1	1	1	1	1	1
GC_00001076	1	1	1	1	1	1	1	1	0	0	1	1	1	1	0	1	0	1	0	0	0	0	0	1	0	0	0	0	1	0	0	0	1	0	0	0	0	0	0	0	0	0	0	1	0	0	0	0	0
GC_00001077	0	0	0	1	0	0	1	0	1	0	1	0	1	1	1	0	0	0	1	0	1	1	0	1	1	1	1	1	0	0	1	0	1	0	1	0	0	0	0	0	0	0	0	1	1	1	1	1	0
GC_00001078	1	1	0	1	1	0	0	0	0	0	0	0	0	1	0	0	0	0	0	0	0	0	0	0	0	0	0	0	1	0	0	0	0	0	0	0	0	0	0	0	0	0	0	0	0	0	0	0	0
GC_00001079	0	0	0	0	0	0	1	1	1	0	1	0	0	1	1	1	1	0	1	0	1	1	0	1	1	1	1	1	1	0	1	1	1	0	1	0	0	0	0	0	0	0	0	1	1	1	1	1	1
GC_00001080	0	0	0	1	0	0	1	0	1	0	1	0	0	1	1	0	1	0	1	0	1	1	0	1	1	1	1	1	1	1	1	1	0	0	0	0	0	0	0	0	0	0	0	1	1	1	1	1	1
GC_00001081	0	1	0	0	1	0	1	0	1	0	1	1	1	0	1	0	1	1	1	0	1	1	0	1	1	1	1	1	1	1	1	1	1	1	0	0	0	0	0	0	0	0	0	1	1	1	1	1	0
GC_00001082	1	1	1	1	0	1	1	0	1	0	0	0	0	0	1	1	1	0	1	0	1	1	0	0	1	1	1	1	0	1	1	1	1	0	0	0	0	0	0	0	0	0	0	1	1	1	1	1	1
GC_00001083	0	0	0	0	0	0	0	1	1	0	1	0	0	1	1	1	1	0	1	0	1	1	0	1	1	1	1	1	1	1	1	1	1	0	1	0	0	0	0	0	0	0	0	1	1	1	1	1	1
GC_00001084	0	0	0	1	0	0	1	1	1	0	1	0	1	1	1	1	1	0	1	0	1	1	0	1	1	1	1	1	0	1	1	1	1	0	1	0	0	0	0	0	0	0	0	1	1	1	1	1	1
GC_00001085	1	1	1	1	0	1	1	1	0	0	1	1	1	1	0	1	0	1	0	0	0	0	0	1	0	0	0	0	1	0	0	0	0	1	1	0	0	0	0	0	0	0	0	1	0	0	0	0	1
GC_00001086	1	1	0	1	1	0	1	1	1	0	1	1	0	0	1	0	1	1	0	0	0	1	0	1	1	0	0	1	0	1	0	1	0	0	1	0	0	0	0	0	0	0	0	1	1	1	1	1	0
GC_00001087	1	1	1	0	1	1	1	0	0	0	1	1	0	0	1	1	1	1	1	1	0	0	1	1	0	0	1	0	1	0	0	0	0	1	0	1	1	1	1	1	1	0	0	1	1	1	1	1	0
GC_00001088	1	0	0	0	0	0	0	1	1	0	0	0	0	1	1	0	1	0	1	0	1	1	0	1	1	1	1	1	1	1	1	1	1	0	0	0	0	0	0	0	0	0	0	1	1	1	1	1	0
GC_00001089	0	1	0	0	0	0	1	0	0	0	0	1	0	1	0	0	0	1	0	0	0	0	0	0	0	0	0	0	0	0	0	0	0	0	0	0	0	0	0	0	0	0	0	0	0	0	0	0	0
GC_00001090	0	0	1	0	1	1	0	0	0	1	1	0	0	1	0	0	0	0	1	1	0	1	1	0	1	1	0	1	1	0	1	0	1	0	0	1	1	1	1	1	1	1	1	0	0	0	0	0	0
GC_00001091	0	0	0	0	0	0	1	1	0	0	1	0	0	1	1	1	1	0	1	0	1	1	0	0	1	1	1	1	1	0	1	1	1	0	1	0	0	0	0	0	0	0	0	0	1	1	1	1	0
GC_00001092	0	0	0	1	0	0	0	0	0	0	1	0	0	1	1	1	1	0	1	0	0	0	0	1	1	0	0	1	1	0	0	1	0	0	1	0	0	0	0	0	0	0	0	1	1	1	1	1	1
GC_00001093	0	0	0	1	0	0	0	0	0	0	0	0	0	0	0	0	0	0	0	0	0	0	0	0	0	0	0	0	0	0	0	0	0	0	0	0	0	0	0	0	0	0	0	0	0	0	0	0	0
GC_00001094	1	1	1	0	0	1	0	0	0	0	1	1	0	1	1	0	1	1	1	0	0	0	0	0	1	0	0	1	1	0	0	1	0	0	0	0	0	0	0	0	0	0	0	0	1	1	1	1	1
GC_00001095	0	0	0	0	1	0	0	0	1	0	0	1	0	1	1	0	1	1	1	0	1	1	0	1	1	1	1	1	0	1	1	1	1	0	0	0	0	0	0	0	0	0	0	1	1	1	1	1	1
GC_00001096	0	0	0	0	0	0	0	1	1	0	0	0	1	1	1	0	1	0	1	0	1	1	0	1	1	1	1	1	1	1	1	0	1	0	1	0	0	0	0	0	0	0	0	1	1	1	1	1	1
GC_00001097	0	0	0	0	0	0	0	0	1	0	0	0	0	1	1	0	1	0	1	0	1	1	0	1	1	1	1	1	0	1	1	1	1	0	0	0	0	0	0	0	0	0	0	1	1	1	1	1	1
GC_00001098	0	0	0	0	0	0	0	0	1	0	1	0	1	1	1	0	1	0	1	0	0	0	0	1	1	0	0	1	0	1	1	0	1	0	1	0	0	0	0	0	0	0	0	1	1	1	1	1	1
GC_00001099	0	0	0	0	0	0	1	1	1	0	0	0	1	1	1	0	1	0	1	0	1	1	0	1	1	1	1	1	1	1	1	1	1	0	1	0	0	0	0	0	0	0	0	1	1	1	1	1	1
GC_00001100	0	1	0	0	0	0	1	0	0	0	0	1	0	1	0	0	0	1	1	0	0	0	0	0	0	0	0	0	0	0	0	0	0	0	0	0	0	0	0	0	0	0	0	0	0	0	0	0	0
GC_00001101	0	1	0	1	0	0	1	1	0	0	1	0	1	0	0	1	0	0	0	0	0	0	0	0	0	0	0	0	1	0	0	0	0	0	1	0	0	0	0	0	0	0	0	0	0	0	0	0	0
GC_00001102	1	0	0	1	0	0	1	0	1	0	0	0	0	1	1	0	1	0	1	0	1	1	0	1	1	1	1	1	0	1	1	1	1	0	0	0	0	0	0	0	0	0	0	1	1	1	1	1	1
GC_00001103	1	0	1	1	1	1	0	0	1	0	0	1	0	1	1	0	1	1	1	0	1	1	0	1	1	1	1	1	1	1	0	1	1	1	0	0	0	0	0	0	0	0	0	1	1	1	1	1	1
GC_00001104	1	1	1	0	0	1	0	0	1	0	0	1	0	1	1	0	1	1	1	0	1	1	0	0	1	1	1	1	0	1	1	1	1	0	0	0	0	0	0	0	0	0	0	0	1	1	1	1	1
GC_00001105	0	0	1	0	0	1	0	0	1	0	0	0	0	0	1	0	1	0	0	0	1	1	0	1	1	1	1	1	1	1	1	1	1	0	1	0	0	0	0	0	0	0	0	1	1	1	1	1	1
GC_00001106	0	1	1	0	1	1	0	0	0	0	0	1	0	1	1	1	1	1	1	0	1	1	0	0	1	1	1	1	1	1	1	1	1	1	0	0	0	0	0	0	0	0	0	0	1	1	1	1	1
GC_00001107	1	1	0	0	0	0	1	1	1	0	1	1	1	0	1	1	1	1	1	0	1	1	0	0	1	1	1	1	0	1	1	1	1	0	0	0	0	0	0	0	0	0	0	0	1	1	1	1	0
GC_00001108	0	0	0	0	0	0	1	1	1	0	1	0	0	1	1	0	1	0	1	0	1	1	0	1	1	1	1	1	0	0	1	0	1	0	0	0	0	0	0	0	0	0	0	0	1	1	1	1	0
GC_00001109	0	1	0	0	0	0	0	0	0	0	0	0	0	1	0	0	0	0	0	0	0	0	0	0	0	0	0	0	0	0	0	0	0	0	0	0	0	0	0	0	0	0	0	0	0	0	0	0	1
GC_00001110	0	0	0	0	1	0	0	1	0	0	0	0	0	0	0	0	0	0	0	0	0	0	0	0	0	0	0	0	0	0	0	0	0	0	0	0	0	0	0	0	0	0	0	0	0	0	0	0	0
GC_00001111	0	0	0	0	0	0	1	0	1	0	0	0	0	1	1	1	1	0	1	0	1	1	0	0	1	1	1	1	0	1	1	1	1	0	1	0	0	0	0	0	0	0	0	1	1	1	1	1	0
GC_00001112	0	0	0	0	0	0	0	0	1	0	0	0	0	1	1	0	1	0	1	0	1	1	0	1	1	1	1	1	0	1	0	1	1	0	0	0	0	0	0	0	0	0	0	1	1	1	1	1	0
GC_00001113	0	0	0	0	0	0	0	0	1	0	0	0	0	1	1	0	1	0	1	0	1	1	0	1	1	1	1	1	0	1	1	1	1	0	0	0	0	0	0	0	0	0	0	1	1	1	1	1	0
GC_00001114	0	0	0	0	0	0	0	0	1	0	0	0	0	1	1	0	1	0	0	0	1	1	0	1	1	1	1	1	0	1	1	1	1	0	0	0	0	0	0	0	0	0	0	1	1	1	1	1	1
GC_00001115	0	0	0	0	0	0	0	0	0	0	0	1	0	0	0	0	0	1	0	0	0	0	0	0	0	0	0	0	0	0	0	0	0	0	0	0	0	0	0	0	0	0	0	0	0	0	0	0	0
GC_00001116	0	1	1	0	0	1	1	0	0	0	0	1	1	1	0	0	0	1	0	0	0	0	0	1	0	0	0	0	0	0	0	0	0	0	1	0	0	0	0	0	0	0	0	1	0	0	0	0	1
GC_00001117	0	1	1	0	0	1	0	0	1	0	1	1	0	1	0	0	0	1	1	0	1	1	0	1	1	1	1	1	1	1	1	0	1	0	0	0	0	0	0	0	0	0	0	1	0	0	0	0	0
GC_00001118	1	1	1	1	1	1	1	0	0	0	1	1	1	0	0	1	0	1	1	0	0	0	0	0	0	0	0	0	1	0	0	0	0	1	1	0	0	0	0	0	0	0	0	0	0	0	0	0	0
GC_00001119	0	0	0	1	0	0	1	1	1	0	1	0	0	1	1	1	1	0	1	0	1	1	0	1	0	1	1	0	1	1	1	1	1	0	0	0	0	0	0	0	0	0	0	1	1	1	1	1	1
GC_00001120	0	1	0	1	0	0	0	0	0	0	1	0	0	1	0	0	0	0	0	1	1	0	1	0	0	0	0	0	1	0	0	0	0	1	1	1	1	1	1	1	1	0	0	0	0	0	0	0	1
GC_00001121	1	1	1	0	0	1	1	0	1	0	1	0	0	1	0	0	0	0	1	0	1	1	0	1	1	1	1	1	0	1	1	0	1	1	0	0	0	0	0	0	0	0	0	0	0	0	0	0	1
GC_00001122	0	1	1	1	1	1	1	0	1	0	1	1	0	1	0	1	0	1	0	0	1	1	0	0	1	1	1	1	1	1	1	1	1	1	1	0	0	0	0	0	0	0	0	0	0	0	0	0	1
GC_00001123	0	0	0	1	0	0	1	1	1	0	1	0	0	1	1	1	1	0	1	0	1	1	0	0	1	1	1	1	1	1	1	1	1	0	1	0	0	0	0	0	0	0	0	0	1	1	1	1	0
GC_00001124	0	0	0	1	0	0	1	1	1	0	1	0	0	1	1	0	1	0	1	0	1	1	0	1	1	1	1	1	0	1	1	1	1	0	0	0	0	0	0	0	0	0	0	1	1	0	1	1	1
GC_00001125	0	0	0	1	0	0	1	0	1	0	1	0	0	1	1	0	1	0	1	0	1	1	0	1	1	1	1	1	0	1	1	1	1	0	0	0	0	0	0	0	0	0	0	1	1	1	1	1	1
GC_00001126	0	0	0	0	0	0	0	1	1	0	0	1	0	1	1	1	1	1	1	0	1	1	0	0	1	1	1	1	0	1	1	1	1	0	1	0	0	0	0	0	0	0	0	1	1	1	1	1	1
GC_00001127	0	0	0	0	0	0	0	1	1	0	0	0	0	1	0	0	0	0	1	0	1	1	0	1	1	1	1	1	0	1	1	1	0	0	0	0	0	0	0	0	0	0	0	1	0	0	0	0	1
GC_00001128	0	0	0	0	0	0	0	0	1	0	0	0	0	1	1	0	1	0	1	0	1	1	0	1	1	1	0	1	0	1	1	1	1	0	0	0	0	0	0	0	0	0	0	1	1	1	1	1	1
GC_00001129	0	1	1	0	0	1	1	0	1	0	1	1	0	0	1	0	1	1	0	0	1	0	0	0	1	0	0	1	0	1	1	1	0	0	0	0	0	0	0	0	0	0	0	0	1	1	1	1	1
GC_00001130	0	0	0	0	0	0	0	0	1	0	0	0	0	1	0	0	0	0	1	0	1	1	0	1	1	1	1	1	0	1	1	1	1	0	0	0	0	0	0	0	0	0	0	1	0	0	0	0	1
GC_00001131	0	0	1	0	0	1	0	0	1	0	0	1	0	1	1	0	1	1	1	0	1	1	0	1	1	1	1	1	1	1	1	1	1	0	0	0	0	0	0	0	0	0	0	1	1	1	1	1	1
GC_00001132	0	0	0	0	0	0	0	0	1	0	1	0	0	0	1	0	1	0	1	0	0	0	0	0	1	0	0	1	0	1	1	1	1	0	1	0	0	0	0	0	0	0	0	0	1	1	1	1	0
GC_00001133	0	0	0	0	0	0	1	0	1	0	1	0	1	1	1	0	1	0	1	0	0	0	0	1	1	0	1	1	1	1	1	1	1	0	0	0	0	0	0	0	0	0	0	1	1	1	1	1	1
GC_00001134	0	0	0	1	0	0	1	0	1	0	1	0	0	1	0	1	0	0	1	0	1	1	0	1	1	1	1	1	1	1	1	0	1	0	1	0	0	0	0	0	0	0	0	1	0	0	0	0	1
GC_00001135	0	1	1	0	0	1	0	0	0	0	1	1	0	1	0	0	0	1	0	0	0	0	0	1	0	0	0	0	1	0	0	0	0	1	1	0	0	0	0	0	0	0	0	1	0	0	0	0	1
GC_00001136	1	0	1	1	0	1	0	0	0	0	1	1	1	1	0	0	0	1	1	0	0	0	0	1	1	0	0	1	1	0	0	1	0	1	1	0	0	0	0	0	0	0	0	0	0	0	0	0	1
GC_00001137	1	0	1	0	0	1	0	0	0	0	1	0	0	1	1	1	1	0	0	0	1	1	0	0	1	1	1	1	0	0	1	1	0	1	1	0	0	0	0	0	0	0	0	1	1	1	1	1	1
GC_00001138	0	0	0	0	0	0	0	0	1	0	1	0	0	1	1	0	1	0	1	0	1	1	0	1	1	1	1	1	1	1	1	1	1	0	0	0	0	0	0	0	0	0	0	1	1	1	1	1	0
GC_00001139	0	0	0	0	0	0	0	0	1	0	1	0	0	1	1	0	1	0	1	0	1	1	0	1	1	1	1	1	0	1	1	1	1	0	1	0	0	0	0	0	0	0	0	1	1	1	1	1	1
GC_00001140	0	0	0	1	0	0	1	0	1	0	0	0	1	1	1	1	1	0	1	0	1	1	0	1	1	1	1	1	1	1	1	1	1	0	0	0	0	0	0	0	0	0	0	1	1	1	1	1	1
GC_00001141	0	0	0	0	0	0	0	0	1	0	0	0	0	1	1	0	1	0	1	0	1	1	0	1	1	1	1	1	0	1	1	1	1	0	0	0	0	0	0	0	0	0	0	1	1	1	1	1	1
GC_00001142	0	0	0	1	0	0	0	0	1	0	0	0	0	0	1	0	1	0	0	0	1	0	0	1	1	0	0	1	1	1	1	0	1	0	0	0	0	0	0	0	0	0	0	1	1	1	1	1	1
GC_00001143	0	0	0	0	0	0	1	0	1	0	0	0	0	1	1	0	1	0	1	0	1	1	0	1	1	1	1	1	0	1	1	1	1	0	1	0	0	0	0	0	0	0	0	1	1	1	1	1	1
GC_00001144	0	1	0	1	1	0	1	1	0	0	1	0	0	0	0	0	0	0	0	0	0	0	0	0	0	0	0	0	0	0	0	0	0	0	1	0	0	0	0	0	0	0	0	0	0	0	0	0	0
GC_00001145	1	1	1	0	1	1	1	0	1	0	0	1	0	1	0	1	0	1	1	0	1	0	0	1	1	1	1	1	1	1	1	1	1	1	0	0	0	0	0	0	0	0	0	1	0	0	0	0	1
GC_00001146	0	0	0	0	0	0	1	0	1	0	0	0	0	1	1	0	1	0	1	0	1	1	0	1	1	1	1	1	0	1	1	1	1	0	0	0	0	0	0	0	0	0	0	1	1	1	1	1	1
GC_00001147	0	0	0	1	0	0	0	0	1	0	0	0	0	1	1	0	1	0	0	0	0	1	0	1	0	1	0	0	1	1	0	0	0	0	0	0	0	0	0	0	0	0	0	1	1	1	1	1	1
GC_00001148	0	0	0	1	0	0	1	0	0	0	1	0	0	1	1	1	1	0	1	0	1	1	0	1	1	1	1	1	1	0	1	0	1	0	0	0	0	0	0	0	0	0	0	1	1	1	1	1	1
GC_00001149	0	0	0	0	0	0	0	1	0	1	0	0	0	0	0	1	0	0	0	1	0	0	1	0	0	0	0	0	1	0	0	0	0	0	1	1	1	1	1	1	1	1	1	0	0	0	0	0	0
GC_00001150	0	0	0	0	0	0	0	0	1	0	0	0	1	1	1	0	1	0	1	0	1	1	0	1	1	1	1	1	0	1	1	1	1	0	0	0	0	0	0	0	0	0	0	1	1	1	1	1	1
GC_00001151	0	0	0	1	0	0	0	0	0	0	0	0	0	0	0	0	0	0	0	0	0	0	0	0	0	0	0	0	0	0	0	0	0	0	0	0	0	0	0	0	0	0	0	0	0	0	0	0	0
GC_00001152	0	1	0	1	0	0	1	0	1	0	1	0	0	0	1	1	1	0	1	0	1	1	0	1	0	1	1	0	1	1	1	1	1	1	0	0	0	0	0	0	0	0	0	1	1	1	1	1	0
GC_00001153	1	1	0	0	1	0	1	0	1	0	0	1	0	1	0	0	0	1	1	0	1	1	0	0	1	1	1	1	0	1	1	1	1	1	0	0	0	0	0	0	0	0	0	1	0	0	0	0	0
GC_00001154	1	1	1	1	1	1	1	0	0	0	1	1	1	0	0	1	0	1	0	0	0	0	0	0	1	0	0	1	1	0	0	0	0	1	1	0	0	0	0	0	0	0	0	0	0	0	0	0	0
GC_00001155	1	1	1	1	0	1	1	1	0	0	1	1	1	0	0	1	0	1	0	0	0	0	0	0	0	0	0	0	1	0	0	0	0	0	0	0	0	0	0	0	0	0	0	0	0	0	0	0	0
GC_00001156	0	0	1	1	0	0	1	0	0	0	0	0	0	0	0	0	0	0	0	0	0	0	0	0	0	0	0	0	1	0	0	0	0	1	0	0	0	0	0	0	0	0	0	0	0	0	0	0	0
GC_00001157	0	0	0	0	0	0	0	0	1	0	0	0	0	1	1	1	1	0	1	0	1	1	0	0	0	1	1	0	1	1	0	1	0	0	1	0	0	0	0	0	0	0	0	0	1	1	1	1	1
GC_00001158	0	0	0	0	0	0	1	1	1	0	0	0	0	1	1	1	0	0	1	0	1	1	0	1	1	1	1	1	1	0	1	1	0	0	1	0	0	0	0	0	0	0	0	1	1	1	1	1	0
GC_00001159	0	0	0	0	0	0	0	0	0	0	0	0	0	1	0	0	0	0	0	0	0	0	0	0	0	0	0	0	0	0	0	0	0	0	0	0	0	0	0	0	0	0	0	0	0	0	0	0	1
GC_00001160	1	1	1	0	0	1	0	0	1	0	0	1	0	0	1	1	1	1	1	0	1	1	0	0	1	1	1	1	1	1	0	1	1	1	1	0	0	0	0	0	0	0	0	1	1	1	1	1	0
GC_00001161	0	0	0	1	0	0	0	1	0	0	1	0	0	1	1	0	1	0	1	0	1	1	0	0	1	1	1	1	0	0	1	1	1	0	1	0	0	0	0	0	0	0	0	1	1	1	1	1	1
GC_00001162	0	0	0	0	0	0	1	0	1	0	1	0	0	1	1	0	1	0	0	0	1	1	0	1	1	1	1	1	0	1	1	1	1	0	0	0	0	0	0	0	0	0	0	1	1	1	1	1	0
GC_00001163	0	0	1	1	0	1	1	0	0	0	1	1	0	1	0	0	0	1	0	0	1	1	0	1	1	1	1	1	0	1	1	1	1	0	1	0	0	0	0	0	0	0	0	1	0	0	0	0	1
GC_00001164	1	1	1	0	1	1	1	0	0	0	1	1	0	1	0	0	0	1	0	0	0	0	0	0	0	0	0	0	1	0	0	0	0	0	1	0	0	0	0	0	0	0	0	0	0	0	0	0	1
GC_00001165	1	0	0	0	0	0	0	0	0	0	1	1	0	0	0	0	0	1	0	0	0	0	0	0	0	0	0	0	1	0	0	0	0	0	0	0	0	0	0	0	0	0	0	0	0	0	0	0	0
GC_00001166	0	0	0	0	0	0	0	0	0	0	0	0	0	0	0	0	0	0	0	0	0	0	0	0	0	0	0	0	0	0	0	0	0	0	0	0	0	0	0	0	0	0	0	0	0	0	0	0	0
GC_00001167	0	0	0	0	0	0	0	0	1	0	0	1	0	1	1	0	1	1	1	0	1	1	0	1	1	1	1	1	1	1	0	1	1	0	0	0	0	0	0	0	0	0	0	1	1	1	1	1	1
GC_00001168	0	0	0	0	0	0	0	0	1	0	0	0	0	1	1	0	1	0	0	0	0	1	0	1	1	1	0	1	0	1	1	1	0	0	0	0	0	0	0	0	0	0	0	1	1	1	1	1	1
GC_00001169	0	1	1	0	0	1	0	0	1	0	0	0	0	0	1	0	1	0	1	0	1	1	0	1	1	1	1	1	0	1	1	1	1	0	0	0	0	0	0	0	0	0	0	1	1	1	1	1	0
GC_00001170	0	0	0	0	0	0	0	0	0	0	1	0	0	0	1	0	1	0	1	0	1	1	0	1	1	0	0	1	0	0	1	1	1	0	1	0	0	0	0	0	0	0	0	1	1	1	1	1	0
GC_00001171	0	0	0	0	0	0	0	0	1	0	0	0	0	1	1	0	1	0	1	0	1	1	0	1	1	1	1	1	0	1	1	1	1	0	0	0	0	0	0	0	0	0	0	1	1	1	1	1	1
GC_00001172	0	0	0	0	0	0	0	0	1	0	0	0	0	1	1	0	1	0	1	0	1	1	0	1	1	1	1	1	0	1	1	1	1	0	0	0	0	0	0	0	0	0	0	1	1	1	1	1	1
GC_00001173	1	0	0	0	0	0	0	0	1	0	0	0	0	1	1	0	1	0	1	0	1	1	0	0	1	1	1	1	0	1	1	1	1	0	0	0	0	0	0	0	0	0	0	1	1	1	1	1	1
GC_00001174	0	1	0	0	0	0	1	0	0	0	1	1	0	1	0	0	0	1	1	0	0	0	0	0	0	0	0	0	1	0	0	0	0	0	0	0	0	0	0	0	0	0	0	0	0	0	0	0	0
GC_00001175	0	0	0	0	0	0	0	1	1	0	0	0	0	1	1	0	1	0	1	0	0	1	0	1	1	1	0	1	0	1	1	1	1	0	0	0	0	0	0	0	0	0	0	1	1	1	1	1	1
GC_00001176	0	0	0	0	0	0	0	0	1	0	0	0	0	1	1	0	1	0	1	0	1	0	0	1	1	0	0	1	1	1	1	1	1	0	0	0	0	0	0	0	0	0	0	1	1	1	1	1	0
GC_00001177	0	0	0	1	0	0	1	0	1	0	0	0	0	1	1	0	1	0	1	0	1	1	0	1	1	1	1	1	0	1	1	1	1	0	0	0	0	0	0	0	0	0	0	1	1	1	1	1	1
GC_00001178	0	0	0	0	0	0	0	0	0	0	0	0	0	0	0	0	0	0	0	0	0	0	0	0	0	0	0	0	0	0	0	0	0	0	0	0	0	0	0	0	0	0	0	0	0	0	0	0	0
GC_00001179	1	1	0	1	0	0	1	1	0	0	1	1	0	0	0	1	0	1	0	0	0	0	0	0	0	0	0	0	1	0	0	0	0	0	1	0	0	0	0	0	0	0	0	0	0	0	0	0	0
GC_00001180	0	0	0	0	0	0	0	0	1	0	0	0	0	1	1	0	1	0	1	0	1	1	0	1	1	1	1	1	0	1	1	0	1	0	0	0	0	0	0	0	0	0	0	1	1	1	1	1	0
GC_00001181	1	0	0	1	0	0	0	0	1	0	1	0	0	1	1	0	1	0	0	0	1	1	0	1	1	1	1	1	1	1	1	1	0	0	0	0	0	0	0	0	0	0	0	1	1	1	1	1	0
GC_00001182	0	0	0	0	0	0	0	0	1	0	0	0	0	0	1	0	1	0	1	0	1	1	0	1	1	1	1	1	1	1	1	1	1	0	0	0	0	0	0	0	0	0	0	1	1	1	1	1	0
GC_00001183	0	1	0	0	0	0	0	1	0	0	1	0	0	0	0	0	0	0	0	0	0	0	0	0	0	0	0	0	1	0	0	0	0	0	1	0	0	0	0	0	0	0	0	0	0	0	0	0	0
GC_00001184	0	0	0	0	0	0	0	0	0	0	0	0	0	1	0	0	0	0	0	0	0	0	0	0	0	0	0	0	0	0	0	0	0	0	0	0	0	0	0	0	0	0	0	0	0	0	0	0	0
GC_00001185	0	0	0	0	0	0	0	1	1	0	0	0	0	0	1	0	1	0	1	0	1	1	0	1	1	1	0	1	0	1	0	1	1	0	0	0	0	0	0	0	0	0	0	1	1	1	1	1	0
GC_00001186	0	0	1	1	0	0	1	0	0	0	0	1	0	1	1	0	1	1	1	0	0	0	0	1	0	0	0	0	1	0	0	1	0	0	0	0	0	0	0	0	0	0	0	1	1	1	1	1	1
GC_00001187	0	0	0	0	0	0	1	0	1	0	1	0	0	0	1	0	1	0	0	0	1	0	0	1	1	0	0	1	0	1	1	1	1	0	1	0	0	0	0	0	0	0	0	1	1	1	1	1	0
GC_00001188	0	0	0	1	0	0	1	0	0	0	1	1	1	1	1	1	1	1	0	0	0	0	0	1	1	0	0	1	0	0	0	0	0	0	1	0	0	0	0	0	0	0	0	1	1	1	1	1	0
GC_00001189	0	0	0	0	0	0	0	0	1	0	1	0	0	1	1	1	1	0	1	0	0	1	0	0	1	1	1	1	1	1	1	1	1	0	1	0	0	0	0	0	0	0	0	0	1	1	1	1	0
GC_00001190	0	1	1	0	1	1	1	0	1	0	0	1	0	0	1	0	1	1	0	0	1	0	0	0	1	0	0	1	0	1	1	1	0	0	0	0	0	0	0	0	0	0	0	0	1	1	1	1	1
GC_00001191	0	0	0	1	0	0	0	0	0	0	0	0	0	1	1	0	1	0	1	0	0	0	0	1	1	0	0	1	0	0	0	1	0	0	1	0	0	0	0	0	0	0	0	1	1	1	1	1	1
GC_00001192	1	1	1	1	0	1	1	1	0	0	1	1	0	0	0	0	0	1	0	0	0	0	0	0	0	0	0	0	0	0	0	0	0	1	1	0	0	0	0	0	0	0	0	0	0	0	0	0	0
GC_00001193	1	1	1	1	1	1	1	0	0	0	1	0	1	1	0	1	0	0	0	0	0	0	0	1	0	0	0	0	1	0	0	1	0	0	1	0	0	0	0	0	0	0	0	1	0	0	0	0	1
GC_00001194	0	0	0	0	0	0	0	0	0	0	0	0	0	0	0	0	0	0	0	0	0	0	0	0	0	0	0	0	0	0	0	0	0	0	0	0	0	0	0	0	0	0	0	0	0	0	0	0	0
GC_00001195	1	1	1	0	1	1	0	1	0	1	0	1	0	0	0	0	0	1	0	1	0	0	1	0	0	0	0	0	1	0	0	0	0	1	1	1	1	1	1	1	1	1	1	0	0	0	0	0	0
GC_00001196	1	1	0	1	0	0	0	0	0	0	0	0	0	0	0	0	0	0	0	0	0	0	0	0	0	0	0	0	0	0	0	0	0	0	0	0	0	0	0	0	0	0	0	0	0	0	0	0	0
GC_00001197	0	1	0	0	0	0	1	1	0	0	0	1	0	0	0	0	0	1	0	0	1	0	0	0	0	0	0	0	1	0	0	0	0	0	0	0	0	0	0	0	0	0	0	0	0	0	0	0	0
GC_00001198	0	1	1	0	0	1	1	0	1	0	0	1	1	0	1	0	1	1	0	0	1	0	0	0	1	0	0	1	0	1	1	1	0	0	0	0	0	0	0	0	0	0	0	0	1	1	1	1	0
GC_00001199	0	1	0	0	0	0	0	0	0	0	0	0	0	0	0	0	0	0	0	0	0	0	0	0	0	0	0	0	0	0	0	0	0	0	0	0	0	0	0	0	0	0	0	0	0	0	0	0	0
GC_00001200	0	0	0	0	0	0	0	0	0	0	0	0	0	0	0	0	0	0	0	0	0	0	0	0	0	0	0	0	0	0	0	0	0	0	0	0	0	0	0	0	0	0	0	0	0	0	0	0	0
GC_00001201	0	0	0	0	0	0	0	0	0	0	0	0	0	0	0	0	0	0	0	0	0	0	0	0	0	0	0	0	0	0	0	0	0	0	0	0	0	0	0	0	0	0	0	0	0	0	0	0	0
GC_00001202	0	0	0	0	0	0	0	0	1	0	1	0	0	0	1	0	1	0	1	0	0	1	0	1	1	1	1	1	0	1	1	1	1	0	0	0	0	0	0	0	0	0	0	1	1	1	1	1	0
GC_00001203	1	0	0	0	1	0	0	0	1	0	0	1	0	1	0	0	0	1	1	0	1	1	0	1	1	1	1	1	0	1	1	1	1	1	0	0	0	0	0	0	0	0	0	1	0	0	0	0	1
GC_00001204	0	0	0	0	0	0	1	0	1	0	1	0	0	0	1	0	1	0	1	0	0	1	0	1	1	1	1	1	1	1	1	1	1	0	0	0	0	0	0	0	0	0	0	1	1	1	1	1	0
GC_00001205	0	0	0	0	0	0	0	0	0	0	0	1	0	1	0	0	0	1	0	0	0	0	0	0	0	0	0	0	0	0	0	0	0	0	0	0	0	0	0	0	0	0	0	0	0	0	0	0	0
GC_00001206	0	1	1	0	0	1	0	0	0	0	1	0	0	1	0	1	0	0	0	0	0	0	0	0	0	0	0	0	0	0	0	0	0	0	1	0	0	0	0	0	0	0	0	0	0	0	0	0	1
GC_00001207	0	0	0	1	0	0	0	0	1	0	0	0	0	0	0	0	0	0	1	0	1	1	0	1	1	1	1	1	0	1	1	1	1	0	0	0	0	0	0	0	0	0	0	1	0	0	0	0	1
GC_00001208	0	0	0	0	0	0	0	0	1	0	0	0	0	1	1	0	1	0	1	0	1	1	0	0	1	1	1	1	0	1	1	0	1	0	0	0	0	0	0	0	0	0	0	0	1	1	1	1	1
GC_00001209	1	0	1	1	1	1	1	1	0	1	1	1	0	0	0	0	0	1	0	1	0	0	1	0	0	0	0	0	1	0	0	0	0	1	0	1	1	1	1	1	1	1	1	0	0	0	0	0	0
GC_00001210	0	0	0	1	0	0	0	0	0	0	0	0	0	1	1	0	1	0	1	0	1	1	0	0	1	1	1	1	0	1	1	1	1	0	0	0	0	0	0	0	0	0	0	0	1	1	1	1	1
GC_00001211	0	0	0	0	0	0	0	0	1	0	0	0	0	0	1	0	1	0	1	0	1	1	0	0	1	1	1	1	0	1	1	1	1	0	0	0	0	0	0	0	0	0	0	0	1	1	1	1	1
GC_00001212	0	0	0	0	0	0	0	1	1	0	0	0	0	1	1	0	1	0	1	0	1	0	0	1	1	0	1	1	0	1	1	0	1	0	0	0	0	0	0	0	0	0	0	1	1	1	1	1	1
GC_00001213	0	1	0	1	0	0	1	0	0	0	0	1	0	1	0	0	0	1	0	0	0	0	0	0	0	0	0	0	0	0	0	0	0	0	0	0	0	0	0	0	0	0	0	0	0	0	0	0	0
GC_00001214	0	0	0	0	0	0	0	0	1	0	0	0	0	1	0	0	0	0	1	0	1	0	0	1	1	0	0	1	0	1	1	1	1	0	0	0	0	0	0	0	0	0	0	1	0	0	0	0	1
GC_00001215	1	1	1	0	0	1	1	0	0	0	1	0	0	1	0	0	0	0	0	0	0	0	0	0	0	0	0	0	0	0	0	0	0	1	0	0	0	0	0	0	0	0	0	0	0	0	0	0	0
GC_00001216	0	0	0	0	0	0	0	0	0	0	0	0	0	0	0	0	0	0	0	0	0	0	0	0	0	0	0	0	0	0	0	0	0	0	0	0	0	0	0	0	0	0	0	0	0	0	0	0	0
GC_00001217	0	0	0	1	0	0	0	1	0	1	1	0	0	0	0	0	0	0	0	1	0	0	1	0	0	0	0	0	1	0	0	0	0	0	0	1	1	1	1	1	1	1	1	0	0	0	0	0	0
GC_00001218	0	0	0	1	0	0	0	0	1	0	0	0	0	0	1	0	1	0	1	0	0	1	0	0	1	1	1	1	1	1	1	1	1	0	0	0	0	0	0	0	0	0	0	0	1	1	1	1	0
GC_00001219	0	0	0	1	0	0	0	0	0	1	1	0	0	0	0	1	0	0	0	1	0	0	1	0	0	0	0	0	0	0	0	0	0	0	1	1	1	1	1	1	1	1	1	0	0	0	0	0	0
GC_00001220	0	0	0	0	0	0	0	0	1	0	0	0	0	1	1	0	1	0	1	0	1	1	0	1	1	1	1	1	0	1	1	0	1	0	0	0	0	0	0	0	0	0	0	1	1	1	1	1	0
GC_00001221	0	0	0	0	0	0	1	0	0	0	0	0	0	0	0	0	0	0	0	0	0	0	0	0	0	0	0	0	0	0	0	0	0	0	0	0	0	0	0	0	0	0	0	0	0	0	0	0	0
GC_00001222	0	0	0	1	0	0	1	1	1	0	1	0	0	1	0	0	0	0	1	0	1	1	0	1	1	1	0	1	1	1	1	0	1	0	0	0	0	0	0	0	0	0	0	1	0	0	0	0	1
GC_00001223	0	0	0	0	0	0	0	0	0	0	0	0	0	0	0	0	0	0	0	0	0	0	0	0	0	0	0	0	0	0	0	0	0	0	0	0	0	0	0	0	0	0	0	0	0	0	0	0	0
GC_00001224	1	0	1	0	1	1	1	1	0	1	0	0	1	0	0	0	0	0	0	1	0	0	1	0	0	0	0	0	0	0	0	0	0	1	0	1	1	1	1	1	1	1	1	0	0	0	0	0	0
GC_00001225	0	0	0	0	0	0	0	0	1	0	0	0	0	1	1	0	1	0	0	0	1	1	0	1	1	1	1	1	0	1	1	1	1	0	0	0	0	0	0	0	0	0	0	1	1	1	1	1	0
GC_00001226	0	0	0	1	0	0	1	0	0	0	0	0	0	1	1	0	1	0	1	0	0	1	0	0	1	1	1	1	1	0	0	0	0	0	0	0	0	0	0	0	0	0	0	0	1	1	1	1	1
GC_00001227	1	1	1	0	0	1	0	0	0	1	1	0	0	0	0	0	0	0	0	1	0	0	1	0	0	0	0	0	0	0	0	0	0	1	0	1	1	1	1	1	1	1	1	0	0	0	0	0	0
GC_00001228	0	0	0	1	0	0	1	0	1	0	1	0	0	1	0	0	0	0	1	0	1	1	0	1	1	1	0	1	0	1	1	1	0	0	0	0	0	0	0	0	0	0	0	1	0	0	0	0	1
GC_00001229	0	1	0	0	0	0	0	0	0	0	0	1	0	0	0	0	0	1	1	0	0	0	0	0	0	0	0	0	0	0	0	0	0	0	0	0	0	0	0	0	0	0	0	0	0	0	0	0	0
GC_00001230	0	0	0	0	0	0	0	1	1	1	0	0	0	1	0	0	0	0	0	0	1	1	0	0	1	1	0	1	0	1	1	1	1	0	1	0	0	0	0	0	0	1	1	0	0	0	0	0	1
GC_00001231	0	0	0	0	0	0	0	0	1	0	0	0	0	1	1	0	1	0	1	0	1	1	0	1	1	1	1	1	1	1	1	1	1	0	0	0	0	0	0	0	0	0	0	1	1	1	1	1	1
GC_00001232	0	0	0	0	0	0	0	0	0	0	0	0	0	0	0	0	0	0	0	0	0	0	0	0	0	0	0	0	0	0	0	0	0	0	0	0	0	0	0	0	0	0	0	0	0	0	0	0	0
GC_00001233	0	0	0	0	0	0	0	0	0	0	0	0	0	0	1	0	1	0	0	0	0	0	0	0	0	0	0	0	0	0	0	0	0	0	0	0	0	0	0	0	0	0	0	0	1	1	1	1	0
GC_00001234	1	1	1	1	0	1	1	0	0	0	0	0	0	0	0	1	0	0	0	0	0	0	0	0	0	0	0	0	1	0	0	0	0	1	0	0	0	0	0	0	0	0	0	0	0	0	0	0	0
GC_00001235	0	0	0	0	0	0	1	0	0	0	0	0	0	1	0	0	0	0	1	0	0	0	0	1	0	0	0	0	0	0	0	1	0	0	0	0	0	0	0	0	0	0	0	1	0	0	0	0	1
GC_00001236	0	0	1	1	0	1	0	0	0	0	0	1	0	0	0	1	0	1	0	0	0	0	0	0	0	0	0	0	1	0	0	0	0	0	1	0	0	0	0	0	0	0	0	0	0	0	0	0	0
GC_00001237	0	0	0	0	0	0	0	1	0	0	0	0	0	0	1	0	1	0	1	0	1	0	0	1	1	0	1	1	0	0	0	1	0	0	0	0	0	0	0	0	0	0	0	0	1	1	1	1	1
GC_00001238	0	1	0	0	0	1	0	0	1	0	0	1	0	0	1	0	1	1	0	0	1	0	0	0	1	0	0	1	0	1	1	1	0	0	0	0	0	0	0	0	0	0	0	0	1	1	1	1	0
GC_00001239	1	1	1	1	0	1	1	1	0	0	1	1	0	0	0	1	0	1	0	0	0	0	0	0	0	0	0	0	1	0	0	0	0	0	1	0	0	0	0	0	0	0	0	0	0	0	0	0	0
GC_00001240	0	0	0	1	0	0	1	0	0	0	1	0	0	1	0	0	0	0	0	0	0	0	0	0	0	0	0	0	1	0	0	0	0	0	1	0	0	0	0	0	0	0	0	0	0	0	0	0	1
GC_00001241	1	0	0	0	0	0	0	0	0	1	1	1	0	0	0	0	0	1	0	1	0	0	1	0	0	0	0	0	0	0	0	0	0	0	0	1	1	1	1	1	1	1	1	0	0	0	0	0	0
GC_00001242	0	1	1	0	0	1	1	0	0	0	1	1	0	1	0	0	0	1	0	0	0	0	0	0	0	0	0	0	0	0	0	0	0	0	1	0	0	0	0	0	0	0	0	0	0	0	0	0	0
GC_00001243	1	0	1	0	1	1	1	1	0	1	0	0	1	0	0	0	0	0	0	1	0	0	1	0	0	0	0	0	0	0	0	0	0	1	0	1	1	1	1	1	1	1	1	0	0	0	0	0	0
GC_00001244	0	0	0	1	0	0	1	0	1	0	1	0	0	0	0	0	0	0	1	0	1	1	0	1	1	1	1	1	1	1	0	1	0	0	1	0	0	0	0	0	0	0	0	1	0	0	0	0	0
GC_00001245	0	0	0	0	0	0	0	0	0	0	0	0	0	1	1	0	0	0	1	0	0	0	0	1	0	0	0	0	1	0	0	0	0	0	0	0	0	0	0	0	0	0	0	0	1	1	1	1	1
GC_00001246	0	0	0	0	0	0	0	0	1	0	0	0	0	0	1	0	1	0	1	0	1	1	0	1	1	1	1	1	0	1	1	1	0	0	0	0	0	0	0	0	0	0	0	0	1	1	1	1	0
GC_00001247	0	0	0	0	0	0	0	0	1	0	0	0	0	0	1	0	1	0	1	0	1	1	0	1	1	1	1	1	0	1	1	1	1	0	0	0	0	0	0	0	0	0	0	1	1	1	1	1	0
GC_00001248	0	0	0	0	0	0	1	0	1	0	1	0	0	1	0	0	0	0	1	0	1	1	0	1	1	1	0	1	0	1	0	1	0	0	0	0	0	0	0	0	0	0	0	1	0	0	0	0	0
GC_00001249	0	0	0	0	0	0	0	0	0	0	0	0	0	0	1	0	1	0	1	0	1	1	0	1	1	1	1	1	0	0	0	1	0	0	0	0	0	0	0	0	0	0	0	1	1	1	1	1	0
GC_00001250	0	1	0	1	0	0	1	0	1	0	0	1	0	0	0	0	0	1	0	0	1	0	0	0	1	0	1	1	0	1	1	1	1	0	0	0	0	0	0	0	0	0	0	0	0	0	0	0	0
GC_00001251	0	0	0	0	0	0	0	0	1	0	0	0	0	1	0	0	0	0	1	0	1	1	0	1	1	1	1	1	0	1	1	1	1	0	0	0	0	0	0	0	0	0	0	1	0	0	0	0	1
GC_00001252	1	1	0	0	1	0	1	0	0	0	1	1	0	1	0	1	0	1	0	0	0	0	0	0	0	0	0	0	0	0	0	0	0	0	0	0	0	0	0	0	0	0	0	0	0	0	0	0	0
GC_00001253	0	1	1	0	0	1	1	0	0	0	1	1	0	1	0	0	0	1	0	0	0	0	0	0	0	0	0	0	0	0	0	0	0	0	1	0	0	0	0	0	0	0	0	0	0	0	0	0	1
GC_00001254	1	1	0	0	0	0	0	0	0	0	1	1	1	0	0	0	0	1	0	0	0	0	0	1	0	0	0	0	0	0	0	0	0	0	1	0	0	0	0	0	0	0	0	1	0	0	0	0	0
GC_00001255	0	0	0	0	0	0	0	1	0	0	0	0	0	1	0	0	0	0	1	0	1	1	0	1	1	1	1	1	0	0	0	1	0	0	1	0	0	0	0	0	0	0	0	1	0	0	0	0	1
GC_00001256	0	0	1	1	0	1	0	0	0	0	1	0	0	0	0	0	0	0	1	0	0	0	0	0	0	0	0	0	1	0	0	0	0	1	0	0	0	0	0	0	0	0	0	0	0	0	0	0	0
GC_00001257	1	1	1	0	1	1	0	0	0	0	0	1	0	0	0	0	0	1	0	0	0	0	0	0	0	0	0	0	0	0	0	0	0	1	0	0	0	0	0	0	0	0	0	0	0	0	0	0	0
GC_00001258	0	0	0	0	0	0	0	0	0	0	0	0	0	0	0	0	0	0	0	0	0	0	0	0	0	0	0	0	0	0	0	0	0	0	0	0	0	0	0	0	0	0	0	0	0	0	0	0	0
GC_00001259	0	0	0	0	0	0	0	0	1	0	0	0	0	0	1	0	1	0	1	0	1	1	0	0	1	1	1	1	0	1	1	0	1	0	0	0	0	0	0	0	0	0	0	1	1	1	1	1	0
GC_00001260	0	0	0	0	0	0	0	1	1	0	1	0	0	0	1	0	1	0	1	0	0	1	0	0	1	1	1	1	0	1	1	1	1	0	0	0	0	0	0	0	0	0	0	0	1	1	1	1	0
GC_00001261	1	1	1	0	1	1	1	0	0	0	0	1	0	0	0	1	0	1	0	0	0	0	0	0	0	0	0	0	1	0	0	0	0	0	1	0	0	0	0	0	0	0	0	0	0	0	0	0	0
GC_00001262	1	1	0	1	1	0	1	0	0	0	1	1	0	1	0	0	0	1	0	0	0	0	0	0	0	0	0	0	0	0	0	0	0	0	0	0	0	0	0	0	0	0	0	0	0	0	0	0	1
GC_00001263	0	0	0	0	0	0	0	0	0	0	0	0	0	0	0	0	0	0	0	0	0	0	0	0	0	0	0	0	0	0	0	0	0	0	0	0	0	0	0	0	0	0	0	0	0	0	0	0	0
GC_00001264	0	0	0	0	0	0	0	0	0	0	0	0	0	0	0	0	0	0	0	0	0	0	0	0	0	0	0	0	0	0	0	0	0	0	0	0	0	0	0	0	0	0	0	0	0	0	0	0	0
GC_00001265	0	0	0	1	0	0	0	0	0	0	0	0	0	1	1	0	1	0	0	0	0	0	0	1	0	0	1	0	0	0	0	0	0	0	0	0	0	0	0	0	0	0	0	1	1	1	1	1	1
GC_00001266	0	0	0	0	0	0	0	0	1	0	0	0	0	1	0	0	0	0	1	0	1	1	0	1	1	1	1	1	0	1	1	0	1	0	0	0	0	0	0	0	0	0	0	1	0	0	0	0	0
GC_00001267	0	0	0	0	0	0	1	1	0	0	1	0	0	1	0	0	0	0	1	0	1	0	0	1	1	0	0	1	0	0	0	1	0	0	0	0	0	0	0	0	0	0	0	1	0	0	0	0	1
GC_00001268	1	1	1	0	1	1	0	0	0	0	0	1	0	0	0	0	0	1	0	0	0	0	0	0	0	0	0	0	0	0	0	0	0	0	0	0	0	0	0	0	0	0	0	0	0	0	0	0	0
GC_00001269	0	1	0	0	0	0	1	0	0	0	0	1	0	1	0	0	0	1	0	0	0	0	0	0	0	0	0	0	0	0	0	0	0	0	0	0	0	0	0	0	0	0	0	0	0	0	0	0	0
GC_00001270	0	1	1	0	0	1	1	0	0	0	1	1	0	0	0	0	0	1	0	0	0	0	0	0	0	0	0	0	0	0	0	0	0	1	0	0	0	0	0	0	0	0	0	0	0	0	0	0	0
GC_00001271	0	0	0	0	0	0	0	0	1	0	0	0	0	0	1	0	1	0	0	0	1	1	0	1	0	1	1	0	0	1	1	1	1	0	0	0	0	0	0	0	0	0	0	0	1	1	1	1	0
GC_00001272	0	0	0	1	0	0	0	1	0	0	1	0	0	1	1	1	1	0	0	0	0	0	0	1	0	0	0	0	1	0	0	1	0	0	1	0	0	0	0	0	0	0	0	0	1	1	1	1	1
GC_00001273	0	1	0	0	0	0	0	0	0	0	0	0	0	1	1	1	1	0	0	0	0	0	0	1	1	0	0	1	0	0	0	1	0	0	1	0	0	0	0	0	0	0	0	0	1	1	1	1	1
GC_00001274	0	0	1	0	0	0	0	0	0	0	0	1	0	0	1	0	1	1	0	0	0	0	0	0	0	0	0	0	0	0	0	1	0	0	0	0	0	0	0	0	0	0	0	0	1	1	1	1	1
GC_00001275	0	0	0	0	0	0	0	0	1	0	0	0	0	0	1	0	0	0	0	0	1	1	0	1	1	1	1	1	1	1	1	1	1	0	0	0	0	0	0	0	0	0	0	1	0	1	1	1	0
GC_00001276	0	0	0	1	0	0	1	1	0	0	1	0	0	1	1	1	0	0	0	0	0	0	0	0	0	0	0	0	1	0	0	0	0	0	1	0	0	0	0	0	0	0	0	0	0	0	1	1	1
GC_00001277	1	1	1	1	0	1	1	0	0	0	0	0	0	1	0	0	0	0	1	0	0	0	0	1	0	0	0	0	1	0	0	1	0	1	0	0	0	0	0	0	0	0	0	1	0	0	0	0	1
GC_00001278	0	0	0	0	0	0	0	0	0	0	0	1	0	1	0	0	0	1	0	0	0	0	0	0	0	0	0	0	0	0	0	0	0	0	0	0	0	0	0	0	0	0	0	0	0	0	0	0	0
GC_00001279	0	0	0	0	0	0	0	0	1	0	0	0	0	1	0	0	0	0	1	0	1	1	0	0	1	1	1	1	0	1	0	1	0	0	0	0	0	0	0	0	0	0	0	1	0	0	0	0	1
GC_00001280	0	0	0	0	0	0	0	0	0	0	0	0	0	0	0	0	0	0	0	0	0	0	0	0	0	0	0	0	0	0	0	0	0	0	0	0	0	0	0	0	0	0	0	0	0	0	0	0	0
GC_00001281	1	1	1	0	1	1	0	0	0	0	1	1	0	0	0	0	0	1	0	0	0	0	0	0	0	0	0	0	1	0	0	0	0	1	1	0	0	0	0	0	0	0	0	0	0	0	0	0	0
GC_00001282	0	0	0	0	0	0	0	0	0	0	0	0	0	0	0	0	0	0	0	0	0	0	0	0	0	0	0	0	0	0	0	0	0	0	0	0	0	0	0	0	0	0	0	0	0	0	0	0	0
GC_00001283	1	1	0	1	0	0	1	1	0	0	1	0	1	1	0	0	0	0	0	0	0	0	0	0	0	0	0	0	1	0	0	1	0	0	1	0	0	0	0	0	0	0	0	0	0	0	0	0	0
GC_00001284	0	0	1	0	0	1	1	0	0	0	1	1	0	1	0	0	0	1	0	0	0	0	0	0	0	0	0	0	0	0	0	0	0	1	0	0	0	0	0	0	0	0	0	0	0	0	0	0	0
GC_00001285	0	0	0	0	0	0	1	0	0	0	0	0	0	1	0	0	0	0	0	0	0	0	0	0	0	0	0	0	1	0	0	0	0	0	0	0	0	0	0	0	0	0	0	0	0	0	0	0	1
GC_00001286	1	1	1	0	0	1	1	0	0	0	0	1	0	0	0	0	0	1	0	0	0	0	0	0	0	0	0	0	1	0	0	0	0	0	1	0	0	0	0	0	0	0	0	0	0	0	0	0	0
GC_00001287	0	0	0	0	0	0	0	0	1	0	0	0	0	0	1	0	1	0	0	0	1	1	0	0	1	1	1	1	0	1	1	1	1	0	0	0	0	0	0	0	0	0	0	0	1	1	1	1	0
GC_00001288	0	0	0	0	0	0	0	0	1	0	0	0	0	0	1	0	1	0	1	0	0	1	0	0	1	1	1	1	0	1	0	1	0	0	0	0	0	0	0	0	0	0	0	0	1	1	1	1	0
GC_00001289	1	1	1	0	1	1	0	0	0	0	0	1	0	0	0	0	0	1	0	0	0	0	0	0	0	0	0	0	0	0	0	0	0	1	0	0	0	0	0	0	0	0	0	0	0	0	0	0	0
GC_00001290	0	0	0	0	0	0	0	0	0	0	0	0	0	0	1	0	1	0	1	0	0	1	0	1	1	1	1	1	0	0	0	0	0	0	0	0	0	0	0	0	0	0	0	0	1	1	1	1	0
GC_00001291	0	0	0	0	0	0	0	0	1	0	0	0	0	1	0	1	0	0	0	0	1	1	0	1	1	1	1	1	0	1	1	1	1	0	0	0	0	0	0	0	0	0	0	1	0	0	0	0	1
GC_00001292	0	0	0	0	0	0	0	0	0	0	0	0	0	0	0	0	0	0	0	0	0	0	0	0	0	0	0	0	0	0	0	0	0	0	0	0	0	0	0	0	0	0	0	0	0	0	0	0	0
GC_00001293	0	0	1	0	0	1	1	0	0	0	1	0	0	0	0	0	0	0	0	0	0	0	0	1	0	0	0	0	0	0	0	0	0	0	0	0	0	0	0	0	0	0	0	1	0	0	0	0	0
GC_00001294	0	0	0	0	0	0	0	0	0	0	0	0	0	1	0	0	0	0	1	0	0	0	0	1	0	0	0	0	0	0	1	1	0	0	0	0	0	0	0	0	0	0	0	1	0	0	0	0	1
GC_00001295	0	0	0	0	0	0	0	0	0	0	0	0	0	0	0	0	0	0	0	0	0	0	0	0	0	0	0	0	0	0	0	0	0	0	0	0	0	0	0	0	0	0	0	0	0	0	0	0	0
GC_00001296	0	0	0	0	0	0	0	0	0	0	0	0	0	0	0	0	0	0	0	0	0	0	0	0	0	0	0	0	0	0	0	0	0	0	0	0	0	0	0	0	0	0	0	0	0	0	0	0	0
GC_00001297	1	1	1	0	1	1	0	0	0	0	0	1	0	0	0	0	0	1	0	0	0	0	0	0	0	0	0	0	0	0	0	0	0	1	0	0	0	0	0	0	0	0	0	0	0	0	0	0	0
GC_00001298	1	1	1	0	0	1	0	0	0	0	0	1	0	0	0	0	0	1	0	0	0	0	0	0	0	0	0	0	0	0	0	0	0	0	0	0	0	0	0	0	0	0	0	0	0	0	0	0	0
GC_00001299	0	1	0	0	0	0	0	0	0	0	0	0	0	1	0	0	0	0	1	0	0	0	0	0	0	0	0	0	0	0	0	0	0	1	1	0	0	0	0	0	0	0	0	0	0	0	0	0	1
GC_00001300	0	0	0	0	0	0	1	1	0	1	0	1	1	0	0	0	0	1	0	1	0	0	1	0	0	0	0	0	0	0	0	0	0	0	0	1	1	1	1	1	1	1	1	0	0	0	0	0	0
GC_00001301	0	0	0	0	0	0	0	0	1	0	0	0	0	0	1	0	1	0	1	0	0	1	0	0	1	1	1	1	0	1	1	0	1	0	0	0	0	0	0	0	0	0	0	0	1	1	1	1	0
GC_00001302	0	1	1	0	0	1	1	0	0	0	0	1	0	0	0	0	0	1	0	0	0	0	0	0	0	0	0	0	0	0	0	0	0	0	0	0	0	0	0	0	0	0	0	0	0	0	0	0	1
GC_00001303	0	0	0	0	0	0	0	0	0	0	0	0	0	0	0	0	0	0	0	0	0	0	0	0	0	0	0	0	0	0	0	0	0	0	0	0	0	0	0	0	0	0	0	0	0	0	0	0	0
GC_00001304	0	1	0	0	0	0	1	0	0	0	0	0	0	0	0	0	0	0	0	0	0	0	0	0	0	0	0	0	0	0	0	0	0	0	0	0	0	0	0	0	0	0	0	0	0	0	0	0	0
GC_00001305	0	0	0	0	0	0	1	0	0	0	0	0	0	1	0	0	0	0	1	0	0	1	0	1	1	1	0	1	1	0	1	1	0	0	0	0	0	0	0	0	0	0	0	0	0	0	0	0	1
GC_00001306	0	0	0	0	0	0	0	0	0	0	0	0	0	0	0	0	0	0	0	0	0	0	0	0	0	0	0	0	0	0	0	0	0	0	0	0	0	0	0	0	0	0	0	0	0	0	0	0	0
GC_00001307	1	0	1	0	1	1	0	0	0	0	0	1	0	0	0	0	0	1	0	0	0	0	0	0	0	0	0	0	1	0	0	0	0	1	0	0	0	0	0	0	0	0	0	0	0	0	0	0	0
GC_00001308	1	0	0	0	1	0	0	0	0	0	0	0	0	0	0	0	0	0	0	0	0	0	0	0	0	0	0	0	1	0	0	0	0	0	1	0	0	0	0	0	0	0	0	0	0	0	0	0	0
GC_00001309	1	1	0	0	0	0	0	0	0	0	1	0	0	0	0	0	0	0	0	0	0	0	0	0	0	0	0	0	1	0	0	0	0	0	1	0	0	0	0	0	0	0	0	0	0	0	0	0	0
GC_00001310	0	0	0	0	0	0	0	0	1	0	0	0	0	1	0	0	0	0	1	0	1	1	0	0	1	1	1	1	0	1	1	1	1	0	0	0	0	0	0	0	0	0	0	0	0	0	0	0	1
GC_00001311	0	0	0	0	0	0	0	0	0	0	0	0	0	0	0	0	0	0	0	0	0	0	0	0	0	0	0	0	0	0	0	0	0	0	0	0	0	0	0	0	0	0	0	0	0	0	0	0	0
GC_00001312	0	0	0	0	0	0	0	0	1	0	0	0	0	1	1	0	1	0	0	0	1	0	0	0	1	0	0	1	1	1	1	0	0	0	0	0	0	0	0	0	0	0	0	0	1	1	1	1	1
GC_00001313	1	1	1	0	0	1	1	1	0	0	1	1	0	0	0	0	0	1	0	0	0	0	0	0	0	0	0	0	0	0	0	0	0	1	0	0	0	0	0	0	0	0	0	0	0	0	0	0	0
GC_00001314	0	0	0	1	0	0	0	1	0	0	0	0	0	0	0	1	0	0	0	0	0	0	0	1	0	0	0	0	1	0	0	0	0	0	1	0	0	0	0	0	0	0	0	1	0	0	0	0	1
GC_00001315	1	0	1	0	0	1	1	1	0	0	1	1	0	0	0	1	0	1	0	0	0	0	0	0	0	0	0	0	0	0	0	0	0	0	0	0	0	0	0	0	0	0	0	0	0	0	0	0	0
GC_00001316	0	0	0	0	0	0	0	0	0	0	0	0	0	0	0	0	0	0	0	0	0	0	0	0	0	0	0	0	0	0	0	0	0	0	0	0	0	0	0	0	0	0	0	0	0	0	0	0	0
GC_00001317	0	0	0	0	0	0	0	0	0	0	0	1	0	1	0	0	0	1	0	0	0	0	0	0	0	0	0	0	0	0	0	0	0	0	0	0	0	0	0	0	0	0	0	0	0	0	0	0	0
GC_00001318	1	1	1	0	0	1	1	1	1	0	1	1	0	0	0	1	0	1	0	0	0	0	0	1	0	0	0	0	0	1	0	0	1	0	0	0	0	0	0	0	0	0	0	0	0	0	0	0	0
GC_00001319	0	0	0	1	0	0	0	1	0	1	0	0	1	0	0	0	0	0	0	1	0	0	1	0	0	0	0	0	1	0	0	0	0	0	0	1	1	1	1	1	1	1	1	0	0	0	0	0	0
GC_00001320	0	0	0	0	0	0	0	0	0	0	0	0	0	0	0	0	0	0	0	0	0	0	0	0	0	0	0	0	0	0	0	0	0	0	0	0	0	0	0	0	0	0	0	0	0	0	0	0	0
GC_00001321	1	1	1	0	0	1	1	0	0	0	0	0	0	0	0	1	0	0	0	0	0	0	0	0	0	0	0	0	0	0	0	0	0	1	1	0	0	0	0	0	0	0	0	0	0	0	0	0	0
GC_00001322	0	0	0	0	0	0	0	0	1	0	0	0	0	0	0	0	0	0	1	0	1	1	0	0	1	1	1	1	0	1	1	1	1	0	0	0	0	0	0	0	0	0	0	0	0	0	0	0	0
GC_00001323	0	0	0	0	0	0	0	0	1	0	0	0	0	0	0	0	0	0	1	0	1	1	0	1	1	1	1	1	0	1	1	1	0	0	0	0	0	0	0	0	0	0	0	1	0	0	0	0	0
GC_00001324	0	0	0	0	0	0	1	1	0	0	1	0	0	1	0	0	0	0	1	0	0	0	0	0	0	0	0	0	1	0	0	1	0	0	0	0	0	0	0	0	0	0	0	0	0	0	0	0	1
GC_00001325	1	1	1	0	1	1	0	1	0	0	0	1	0	1	0	0	0	1	0	0	0	0	0	0	0	0	0	0	0	0	0	0	0	1	0	0	0	0	0	0	0	0	0	0	0	0	0	0	1
GC_00001326	0	0	0	0	0	0	0	0	0	0	0	0	0	1	0	0	0	0	0	0	0	0	0	0	0	0	0	0	1	0	0	0	0	0	1	0	0	0	0	0	0	0	0	0	0	0	0	0	1
GC_00001327	0	0	0	0	0	0	0	0	0	0	0	0	0	0	0	0	0	0	0	0	0	0	0	0	0	0	0	0	0	0	0	0	0	0	0	0	0	0	0	0	0	0	0	0	0	0	0	0	0
GC_00001328	0	0	1	1	0	1	0	0	0	0	1	0	0	0	0	1	0	0	0	0	0	0	0	0	0	0	0	0	1	0	0	0	0	1	1	0	0	0	0	0	0	0	0	0	0	0	0	0	0
GC_00001329	0	0	0	0	0	0	0	0	0	0	0	0	0	0	0	0	0	0	0	1	0	0	1	0	0	0	0	0	0	0	0	0	0	0	0	1	1	1	1	1	1	0	0	0	0	0	0	0	0
GC_00001330	0	1	0	0	0	0	1	0	0	0	1	1	0	0	0	0	0	1	0	0	0	0	0	0	0	0	0	0	0	0	0	0	0	0	1	0	0	0	0	0	0	0	0	0	0	0	0	0	1
GC_00001331	0	0	0	0	0	0	0	1	0	1	0	0	1	0	0	0	0	0	0	1	0	0	1	0	0	0	0	0	0	0	0	0	0	0	0	1	1	1	1	1	1	1	1	0	0	0	0	0	0
GC_00001332	0	0	0	0	0	0	0	0	0	0	0	0	0	0	0	0	0	0	0	0	0	0	0	0	0	0	0	0	0	0	0	0	0	0	0	0	0	0	0	0	0	0	0	0	0	0	0	0	0
GC_00001333	0	1	0	0	0	0	0	0	0	0	0	1	1	1	0	0	0	1	1	0	0	0	0	0	0	0	0	0	0	0	0	0	0	0	0	0	0	0	0	0	0	0	0	0	0	0	0	0	0
GC_00001334	0	0	0	1	1	0	0	0	0	0	0	0	0	0	0	0	0	0	0	0	0	0	0	0	0	0	0	0	0	0	0	0	0	0	0	0	0	0	0	0	0	0	0	0	0	0	0	0	0
GC_00001335	0	0	1	0	1	1	0	0	0	0	0	0	0	0	0	1	0	0	0	0	0	0	0	0	0	0	0	0	0	0	0	0	0	0	1	0	0	0	0	0	0	0	0	0	0	0	0	0	0
GC_00001336	0	0	0	1	0	0	1	0	0	0	1	0	0	1	0	0	0	0	0	0	0	0	0	0	0	0	0	0	1	0	1	1	0	0	0	0	0	0	0	0	0	0	0	1	0	0	0	0	1
GC_00001337	0	0	0	0	0	0	0	0	1	0	0	0	0	0	0	0	0	0	1	0	0	0	0	1	0	0	0	0	0	1	1	1	0	0	0	0	0	0	0	0	0	0	0	1	0	0	0	0	1
GC_00001338	0	0	0	0	0	0	0	0	0	0	1	0	0	1	0	0	0	0	0	0	0	0	0	0	0	0	0	0	0	0	0	0	0	0	0	0	0	0	0	0	0	0	0	0	0	0	0	0	1
GC_00001339	1	0	1	0	0	1	0	0	0	0	1	0	0	0	0	1	0	0	0	0	0	0	0	0	0	0	0	0	1	0	0	0	0	1	1	0	0	0	0	0	0	0	0	0	0	0	0	0	0
GC_00001340	0	1	1	0	0	1	0	0	0	0	0	1	0	0	0	0	0	1	0	0	0	0	0	0	0	0	0	0	0	0	0	0	0	0	0	0	0	0	0	0	0	0	0	0	0	0	0	0	0
GC_00001341	0	0	0	0	0	0	0	0	0	0	0	0	0	0	0	0	0	0	0	0	0	0	0	0	0	0	0	0	0	0	0	0	0	0	0	0	0	0	0	0	0	0	0	0	0	0	0	0	0
GC_00001342	1	0	0	0	0	0	0	0	0	0	0	0	1	0	0	0	0	0	0	0	0	0	0	0	0	0	0	0	0	0	0	0	0	0	0	0	0	0	0	0	0	0	0	0	0	0	0	0	0
GC_00001343	0	0	0	0	0	0	0	0	0	0	0	0	0	0	0	0	0	0	0	0	0	0	0	0	0	0	0	0	0	0	0	0	0	0	0	0	0	0	0	0	0	0	0	0	0	0	0	0	0
GC_00001344	0	0	0	0	0	0	0	0	0	0	0	0	0	0	0	0	0	0	0	0	0	0	0	0	0	0	0	0	0	0	0	0	0	0	0	0	0	0	0	0	0	0	0	0	0	0	0	0	0
GC_00001345	0	0	0	1	0	0	0	1	0	1	0	0	0	0	0	0	0	0	0	1	0	0	1	0	0	0	0	0	1	0	0	0	0	0	0	1	1	1	1	1	1	1	1	0	0	0	0	0	0
GC_00001346	0	0	0	0	0	0	0	0	0	0	0	0	0	0	0	0	0	0	0	0	0	0	0	0	0	0	0	0	0	0	0	0	0	0	0	0	0	0	0	0	0	0	0	0	0	0	0	0	0
GC_00001347	0	0	0	0	1	0	1	1	0	1	0	0	0	0	0	0	0	0	0	1	0	0	1	0	0	0	0	0	0	0	0	0	0	0	0	1	1	1	1	1	1	1	1	0	0	0	0	0	0
GC_00001348	0	0	0	0	0	0	0	0	0	0	0	0	0	0	1	0	1	0	0	0	0	0	0	0	0	0	0	0	0	0	0	0	0	0	0	0	0	0	0	0	0	0	0	0	1	1	1	1	0
GC_00001349	0	0	0	0	0	0	0	0	1	0	0	0	0	1	0	0	0	0	0	0	1	1	0	0	1	1	0	1	0	1	0	0	0	0	1	0	0	0	0	0	0	0	0	0	0	0	0	0	0
GC_00001350	0	1	1	0	0	1	0	0	0	0	1	1	0	0	0	0	0	1	0	0	0	0	0	0	0	0	0	0	1	0	0	0	0	0	1	0	0	0	0	0	0	0	0	0	0	0	0	0	0
GC_00001351	1	0	1	1	0	1	1	0	0	0	1	0	1	0	0	1	0	0	0	0	0	0	0	0	0	0	0	0	0	0	0	0	0	1	0	0	0	0	0	0	0	0	0	0	0	0	0	0	0
GC_00001352	1	0	1	1	1	1	1	0	0	0	0	1	0	0	0	0	0	1	0	0	0	0	0	0	0	0	0	0	1	0	0	0	0	1	0	0	0	0	0	0	0	0	0	0	0	0	0	0	0
GC_00001353	0	0	0	0	0	0	1	0	1	0	0	0	0	0	0	0	0	0	1	0	1	1	0	1	1	1	1	1	1	1	1	1	1	0	0	0	0	0	0	0	0	0	0	1	0	0	0	0	0
GC_00001354	1	1	1	0	0	1	0	0	0	0	1	1	0	0	0	1	0	1	0	0	0	0	0	0	0	0	0	0	0	0	0	0	0	0	0	0	0	0	0	0	0	0	0	0	0	0	0	0	0
GC_00001355	1	0	1	0	1	1	0	0	0	0	0	1	0	0	0	0	0	1	1	0	0	0	0	0	0	0	0	0	0	0	0	0	0	0	0	0	0	0	0	0	0	0	0	0	0	0	0	0	0
GC_00001356	0	0	0	1	0	0	1	0	0	0	1	1	0	0	0	1	0	1	0	0	0	0	0	0	0	0	0	0	1	0	0	0	0	0	1	0	0	0	0	0	0	0	0	0	0	0	0	0	0
GC_00001357	1	1	1	0	0	1	0	0	0	0	1	1	0	0	0	0	0	1	0	0	0	0	0	0	0	0	0	0	0	0	0	0	0	0	0	0	0	0	0	0	0	0	0	0	0	0	0	0	0
GC_00001358	0	1	0	0	0	0	0	0	0	0	1	1	0	0	0	1	0	1	0	0	0	0	0	0	0	0	0	0	0	0	0	0	0	0	1	0	0	0	0	0	0	0	0	0	0	0	0	0	0
GC_00001359	0	1	0	0	0	0	0	0	0	0	1	0	0	0	0	0	0	0	0	0	1	0	0	0	0	0	0	0	0	0	0	0	0	0	0	0	0	0	0	0	0	0	0	0	0	0	0	0	0
GC_00001360	0	0	0	0	0	0	0	0	1	0	0	0	0	0	1	0	1	0	1	0	0	0	0	0	1	0	0	1	0	1	1	1	1	0	0	0	0	0	0	0	0	0	0	0	1	1	1	1	0
GC_00001361	0	0	0	0	0	0	0	0	0	0	0	0	0	0	1	0	1	0	1	0	1	1	0	0	1	1	0	1	0	0	1	0	1	0	0	0	0	0	0	0	0	0	0	0	1	1	1	1	0
GC_00001362	0	1	0	1	1	0	1	0	0	0	0	0	0	1	0	0	0	0	1	0	0	0	0	0	0	0	0	0	0	0	0	0	0	0	0	0	0	0	0	0	0	0	0	0	0	0	0	0	0
GC_00001363	0	0	0	0	0	0	0	1	1	0	0	0	0	0	0	0	1	0	1	0	0	0	0	1	1	0	0	1	0	1	1	1	1	0	0	0	0	0	0	0	0	0	0	0	1	0	0	0	0
GC_00001364	1	0	0	1	1	0	1	1	0	0	1	0	0	0	0	0	0	0	0	0	0	0	0	0	0	0	0	0	0	0	0	0	0	0	1	0	0	0	0	0	0	0	0	0	0	0	0	0	0
GC_00001365	1	1	1	0	0	1	0	0	0	0	0	1	0	0	0	0	0	1	0	0	0	0	0	0	0	0	0	0	0	0	0	0	0	1	0	0	0	0	0	0	0	0	0	0	0	0	0	0	0
GC_00001366	0	0	0	1	0	0	1	0	0	0	1	0	0	0	0	1	0	0	0	0	0	0	0	0	0	0	0	0	1	0	0	0	0	0	1	0	0	0	0	0	0	0	0	0	0	0	0	0	0
GC_00001367	1	1	1	1	0	1	0	0	0	0	1	1	0	0	0	0	0	1	0	0	0	0	0	0	0	0	0	0	1	0	0	0	0	1	1	0	0	0	0	0	0	0	0	0	0	0	0	0	0
GC_00001368	1	0	1	0	1	1	0	1	0	0	1	1	0	1	0	0	0	1	1	0	0	0	0	0	0	0	0	0	0	0	0	0	0	1	0	0	0	0	0	0	0	0	0	0	0	0	0	0	1
GC_00001369	0	0	0	1	0	0	1	0	0	0	1	0	0	0	0	1	0	0	0	0	0	0	0	0	0	0	0	0	0	0	0	0	0	0	1	0	0	0	0	0	0	0	0	0	0	0	0	0	0
GC_00001370	1	0	1	0	0	1	1	0	0	0	1	0	0	0	0	1	0	0	0	0	0	0	0	0	0	0	0	0	0	0	0	0	0	0	1	0	0	0	0	0	0	0	0	0	0	0	0	0	0
GC_00001371	0	1	0	0	0	0	0	0	0	0	0	0	0	0	0	0	0	0	0	0	0	0	0	0	0	0	0	0	1	0	0	0	0	0	1	0	0	0	0	0	0	0	0	0	0	0	0	0	0
GC_00001372	0	1	1	0	0	1	1	0	0	0	1	1	0	0	0	0	0	0	0	0	0	0	0	0	0	0	0	0	1	0	0	0	0	0	1	0	0	0	0	0	0	0	0	0	0	0	0	0	0
GC_00001373	0	0	0	0	0	0	0	0	0	0	0	0	0	0	0	0	0	0	0	0	0	0	0	0	0	0	0	0	0	0	0	0	0	0	0	0	0	0	0	0	0	0	0	0	0	0	0	0	0
GC_00001374	0	1	1	0	0	1	1	0	0	0	1	0	0	0	0	1	0	0	0	0	0	0	0	0	0	0	0	0	1	0	0	0	0	0	1	0	0	0	0	0	0	0	0	0	0	0	0	0	0
GC_00001375	1	1	1	0	1	1	0	0	0	0	1	1	0	0	0	0	0	1	0	0	0	0	0	0	0	0	0	0	0	0	0	0	0	0	0	0	0	0	0	0	0	0	0	0	0	0	0	0	1
GC_00001376	1	0	1	0	0	1	1	0	0	0	1	1	0	0	0	0	0	1	0	0	0	0	0	0	0	0	0	0	0	0	0	0	0	1	0	0	0	0	0	0	0	0	0	0	0	0	0	0	0
GC_00001377	0	0	0	1	0	0	1	1	0	0	1	0	0	0	0	0	0	0	0	0	0	0	0	0	0	0	1	0	1	0	0	0	0	0	0	0	0	0	0	0	0	0	0	0	0	0	0	0	0
GC_00001378	1	1	1	0	0	1	0	0	0	0	0	1	0	0	0	0	0	1	0	0	0	0	0	0	0	0	0	0	0	0	0	0	0	1	0	0	0	0	0	0	0	0	0	0	0	0	0	0	0
GC_00001379	0	0	0	0	0	0	0	0	0	0	1	0	0	0	0	0	0	0	0	1	0	0	1	0	0	0	0	0	0	0	0	0	0	1	1	1	1	1	1	1	1	0	0	0	0	0	0	0	0
GC_00001380	0	0	0	0	0	0	0	0	0	0	0	0	0	0	1	0	1	0	0	0	0	0	0	0	0	0	0	0	0	0	0	0	0	0	0	0	0	0	0	0	0	0	0	0	1	1	1	1	0
GC_00001381	0	0	0	1	0	0	0	0	0	0	0	0	0	0	0	0	0	0	0	0	0	0	0	0	0	0	0	0	0	0	0	0	0	0	0	0	0	0	0	0	0	0	0	0	0	0	0	0	0
GC_00001382	0	0	0	0	0	0	0	0	1	0	0	0	0	0	1	1	1	0	1	0	0	0	0	1	0	0	0	0	0	1	1	0	1	0	0	0	0	0	0	0	0	0	0	0	1	1	1	1	0
GC_00001383	0	0	1	0	0	1	1	0	0	0	1	0	0	0	0	1	0	0	0	0	0	0	0	0	0	0	0	0	0	0	0	0	0	0	1	0	0	0	0	0	0	0	0	0	0	0	0	0	0
GC_00001384	0	0	0	0	0	0	0	0	0	0	1	0	0	1	0	0	0	0	0	0	0	0	0	0	0	0	0	0	0	0	0	0	0	0	0	0	0	0	0	0	0	0	0	0	0	0	0	0	1
GC_00001385	0	0	0	0	0	0	0	0	0	0	0	1	0	1	0	0	0	1	0	0	0	0	0	0	0	0	0	0	0	0	0	0	0	0	0	0	0	0	0	0	0	0	0	0	0	0	0	0	0
GC_00001386	0	0	0	0	0	0	0	0	1	0	1	0	0	0	0	0	0	0	1	0	0	1	0	0	1	0	1	1	0	1	1	1	1	0	0	0	0	0	0	0	0	0	0	0	0	0	0	0	0
GC_00001387	0	0	0	0	0	0	0	0	0	0	0	0	0	0	0	0	0	0	0	0	0	0	0	0	0	0	0	0	0	0	0	0	0	0	0	0	0	0	0	0	0	0	0	0	0	0	0	0	0
GC_00001388	0	0	0	0	0	0	0	0	0	0	1	0	1	0	0	0	0	0	1	0	0	0	0	0	0	0	0	0	1	0	0	0	0	0	0	0	0	0	0	0	0	0	0	0	0	0	0	0	0
GC_00001389	1	1	1	1	1	1	0	0	0	0	0	1	0	0	0	0	0	1	0	0	0	0	0	0	0	0	0	0	0	0	0	0	0	1	0	0	0	0	0	0	0	0	0	0	0	0	0	0	0
GC_00001390	0	0	1	0	0	1	0	0	0	0	1	0	0	0	0	0	0	0	0	0	0	0	0	0	0	0	0	0	1	0	0	0	0	0	0	0	0	0	0	0	0	0	0	0	0	0	0	0	0
GC_00001391	0	0	0	1	0	0	0	0	0	0	1	0	0	0	0	0	0	0	0	0	0	0	0	0	0	0	0	0	0	0	0	0	0	0	1	0	0	0	0	0	0	0	0	0	0	0	0	0	0
GC_00001392	1	0	0	0	0	0	0	0	0	0	0	0	0	0	0	0	0	0	0	1	0	0	1	0	0	0	0	0	0	0	0	0	0	0	1	1	1	1	1	1	1	0	0	0	0	0	0	0	0
GC_00001393	0	0	0	0	0	0	0	0	0	0	0	0	0	0	0	0	0	0	0	0	0	0	0	0	0	0	0	0	0	0	0	0	0	0	0	0	0	0	0	0	0	0	0	0	0	0	0	0	0
GC_00001394	0	0	0	0	0	0	1	1	0	0	1	0	0	0	1	0	1	0	0	0	0	0	0	0	0	0	0	0	0	0	0	1	0	0	0	0	0	0	0	0	0	0	0	0	1	1	1	1	0
GC_00001395	0	1	0	1	1	0	1	0	0	0	0	0	0	1	0	0	0	0	1	0	0	0	0	0	0	0	0	0	0	0	0	0	0	0	0	0	0	0	0	0	0	0	0	0	0	0	0	0	0
GC_00001396	0	1	0	0	0	0	1	0	0	0	0	1	0	1	0	0	0	1	1	0	0	0	0	0	0	0	0	0	0	0	0	0	0	0	0	0	0	0	0	0	0	0	0	0	0	0	0	0	0
GC_00001397	0	0	0	0	0	0	0	0	1	0	0	0	0	0	0	0	0	0	1	0	1	1	0	1	0	1	1	0	0	1	0	1	1	0	0	0	0	0	0	0	0	0	0	1	0	0	0	0	0
GC_00001398	0	0	0	1	0	0	1	0	1	0	0	0	0	1	0	0	0	0	0	0	1	1	0	0	1	1	0	1	0	1	0	0	0	0	0	0	0	0	0	0	0	0	0	0	0	0	0	0	1
GC_00001399	0	0	0	1	0	0	0	0	0	0	0	0	0	1	0	0	0	0	0	0	0	0	0	1	0	0	0	0	0	0	0	0	0	0	0	0	0	0	0	0	0	0	0	1	0	0	0	0	1
GC_00001400	0	1	0	1	0	0	0	0	0	0	1	0	0	0	0	0	0	0	1	0	0	0	0	1	1	0	0	1	0	0	0	1	0	0	0	0	0	0	0	0	0	0	0	1	0	0	0	0	0
GC_00001401	0	0	0	0	0	0	0	0	0	0	0	0	0	0	0	1	0	0	0	0	1	1	0	1	1	1	1	1	0	0	1	1	0	0	0	0	0	0	0	0	0	0	0	1	0	0	0	0	0
GC_00001402	0	0	0	0	0	0	0	0	1	0	0	0	0	0	0	0	0	0	1	0	1	1	0	0	1	1	0	1	0	1	1	1	1	0	1	0	0	0	0	0	0	0	0	0	0	0	0	0	0
GC_00001403	0	0	0	0	0	0	0	0	1	0	0	0	0	1	0	0	0	0	1	0	1	1	0	0	1	1	0	1	0	1	0	1	0	0	0	0	0	0	0	0	0	0	0	0	0	0	0	0	1
GC_00001404	1	0	1	1	1	1	1	0	0	0	1	1	0	0	0	0	0	1	0	0	0	0	0	0	0	0	0	0	0	0	0	0	0	1	0	0	0	0	0	0	0	0	0	0	0	0	0	0	0
GC_00001405	1	1	1	0	0	1	0	0	0	0	0	1	0	0	0	0	0	1	0	0	0	0	0	0	0	0	0	0	0	0	0	0	0	0	0	0	0	0	0	0	0	0	0	0	0	0	0	0	0
GC_00001406	0	0	0	0	0	0	0	0	1	0	0	0	0	0	0	0	0	0	1	0	0	1	0	0	1	1	1	1	0	1	1	1	1	0	0	0	0	0	0	0	0	0	0	0	0	0	0	0	0
GC_00001407	0	0	1	0	0	1	1	0	0	0	0	1	1	0	0	0	0	1	0	0	0	0	0	0	0	0	0	0	1	0	0	0	0	0	0	0	0	0	0	0	0	0	0	0	0	0	0	0	0
GC_00001408	1	1	0	0	0	0	1	1	0	0	1	1	0	0	0	1	0	1	0	0	0	0	0	0	0	0	0	0	0	0	0	0	0	0	1	0	0	0	0	0	0	0	0	0	0	0	0	0	0
GC_00001409	1	1	1	0	1	1	0	0	0	0	0	1	0	0	0	0	0	1	0	0	0	0	0	0	0	0	0	0	0	0	0	0	0	0	0	0	0	0	0	0	0	0	0	0	0	0	0	0	0
GC_00001410	0	0	0	1	0	0	0	0	0	0	0	0	0	0	0	0	0	0	0	0	0	0	0	0	0	0	0	0	0	0	0	0	0	1	0	0	0	0	0	0	0	0	0	0	0	0	0	0	0
GC_00001411	1	1	1	0	0	1	0	0	0	0	0	1	0	0	0	0	0	1	0	0	0	0	0	0	0	0	0	0	0	0	0	0	0	0	0	0	0	0	0	0	0	0	0	0	0	0	0	0	0
GC_00001412	0	0	0	0	0	0	1	0	0	0	1	0	0	0	0	1	0	0	0	0	0	0	0	0	0	0	0	0	0	0	0	0	0	0	1	0	0	0	0	0	0	0	0	0	0	0	0	0	0
GC_00001413	0	0	0	0	0	0	0	0	0	0	0	0	0	0	0	0	0	0	0	0	0	0	0	0	0	0	0	0	0	0	0	0	0	0	0	0	0	0	0	0	0	0	0	0	0	0	0	0	0
GC_00001414	0	0	0	0	0	0	0	0	0	0	0	0	0	0	0	0	0	0	0	0	0	0	0	0	0	0	0	0	0	0	0	0	0	0	0	0	0	0	0	0	0	0	0	0	0	0	0	0	0
GC_00001415	0	0	0	0	0	0	0	0	0	0	0	0	0	0	0	0	0	0	0	0	0	0	0	0	0	0	0	0	0	0	0	0	0	0	0	0	0	0	0	0	0	0	0	0	0	0	0	0	0
GC_00001416	0	0	0	0	0	0	0	0	0	0	0	0	0	0	0	1	0	0	0	0	0	0	0	0	0	0	0	0	0	0	0	0	0	0	1	0	0	0	0	0	0	0	0	0	0	0	0	0	0
GC_00001417	0	0	1	0	0	0	0	0	0	0	1	0	0	0	0	0	0	0	0	0	0	0	0	0	0	0	0	0	0	0	0	0	0	0	1	0	0	0	0	0	0	0	0	0	0	0	0	0	0
GC_00001418	0	1	0	0	0	0	1	0	0	0	0	1	0	1	0	0	0	1	1	0	0	0	0	0	0	0	0	0	0	0	0	0	0	0	0	0	0	0	0	0	0	0	0	0	0	0	0	0	0
GC_00001419	0	0	0	0	0	0	0	1	0	0	0	0	0	0	0	0	0	0	1	0	0	1	0	0	0	1	1	0	0	0	0	0	0	0	0	0	0	0	0	0	0	0	0	0	0	0	0	0	0
GC_00001420	0	1	0	0	0	0	0	0	0	0	0	0	0	0	0	0	0	0	0	0	0	0	0	0	0	0	0	0	0	0	0	0	0	0	0	0	0	0	0	0	0	0	0	0	0	0	0	0	0
GC_00001421	1	0	1	0	0	1	0	0	0	0	0	1	0	0	0	0	0	1	0	0	0	0	0	0	0	0	0	0	0	0	0	0	0	1	0	0	0	0	0	0	0	0	0	0	0	0	0	0	0
GC_00001422	0	0	0	0	0	0	0	0	0	0	0	0	0	0	0	0	0	0	0	0	0	0	0	0	0	0	0	0	0	0	0	0	0	0	0	0	0	0	0	0	0	0	0	0	0	0	0	0	0
GC_00001423	0	0	0	0	0	0	0	0	0	0	0	0	0	0	0	0	0	0	0	0	0	0	0	0	0	0	0	0	0	0	0	0	0	0	0	0	0	0	0	0	0	0	0	0	0	0	0	0	0
GC_00001424	1	1	1	0	0	1	0	0	0	0	1	1	0	0	0	1	0	1	0	0	0	0	0	0	0	0	0	0	0	0	0	0	0	0	1	0	0	0	0	0	0	0	0	0	0	0	0	0	0
GC_00001425	0	0	0	0	0	0	0	0	0	0	0	0	0	0	0	0	0	0	1	0	1	1	0	1	0	1	1	0	0	0	1	0	1	0	0	0	0	0	0	0	0	0	0	0	0	0	0	0	1
GC_00001426	0	0	0	0	0	0	0	1	0	0	0	0	1	0	0	0	0	0	0	0	0	0	0	0	0	0	0	0	1	0	0	0	0	0	1	0	0	0	0	0	0	0	0	0	0	0	0	0	0
GC_00001427	1	1	1	0	1	1	1	0	0	0	0	1	0	0	0	0	0	1	0	0	0	0	0	0	0	0	0	0	0	0	0	0	0	1	0	0	0	0	0	0	0	0	0	0	0	0	0	0	0
GC_00001428	1	1	0	0	0	1	0	0	0	0	0	1	0	0	0	0	0	1	0	0	0	0	0	0	0	0	0	0	0	0	0	0	0	1	0	0	0	0	0	0	0	0	0	0	0	0	0	0	0
GC_00001429	0	1	1	0	0	1	0	0	0	0	0	1	0	0	0	0	0	1	0	0	0	0	0	0	0	0	0	0	0	0	0	0	0	0	0	0	0	0	0	0	0	0	0	0	0	0	0	0	0
GC_00001430	0	1	0	0	0	0	0	1	0	0	0	1	0	0	0	1	0	1	0	0	0	0	0	0	0	0	0	0	1	0	0	0	0	0	1	0	0	0	0	0	0	0	0	0	0	0	0	0	0
GC_00001431	0	1	0	1	0	0	0	0	0	0	1	1	0	0	0	0	0	1	0	0	0	0	0	0	0	0	0	0	0	0	0	0	0	0	0	0	0	0	0	0	0	0	0	0	0	0	0	0	0
GC_00001432	1	1	1	0	0	1	0	0	0	0	0	1	0	0	0	0	0	1	0	0	0	0	0	0	0	0	0	0	0	0	0	0	0	0	0	0	0	0	0	0	0	0	0	0	0	0	0	0	0
GC_00001433	1	1	1	0	1	1	0	0	0	0	0	1	0	0	0	0	0	1	0	0	0	0	0	0	0	0	0	0	0	0	0	0	0	0	0	0	0	0	0	0	0	0	0	0	0	0	0	0	0
GC_00001434	0	0	0	1	0	0	0	1	0	0	0	0	0	0	0	0	0	0	0	0	0	0	0	0	0	0	0	0	0	0	0	0	0	0	0	0	0	0	0	0	0	0	0	0	0	0	0	0	0
GC_00001435	0	0	0	0	0	0	0	0	0	0	0	0	0	0	0	0	0	0	0	0	0	0	0	0	0	0	0	0	0	0	0	0	0	0	0	0	0	0	0	0	0	0	0	0	0	0	0	0	0
GC_00001436	0	0	0	0	0	0	0	0	0	0	0	0	0	0	0	0	0	0	0	0	0	0	0	0	0	0	0	0	0	0	0	0	0	0	0	0	0	0	0	0	0	0	0	0	0	0	0	0	0
GC_00001437	1	0	1	0	0	1	0	0	0	0	0	1	0	0	0	0	0	1	0	0	0	0	0	0	0	0	0	0	0	0	0	0	0	1	0	0	0	0	0	0	0	0	0	0	0	0	0	0	0
GC_00001438	0	0	0	0	0	0	0	0	0	1	0	0	0	0	0	0	0	0	0	1	0	0	1	0	0	0	0	0	0	0	0	0	0	0	0	1	1	1	1	1	1	1	1	0	0	0	0	0	0
GC_00001439	1	1	1	0	1	1	0	0	0	0	0	1	0	0	0	0	0	1	0	0	0	0	0	0	0	0	0	0	0	0	0	0	0	1	0	0	0	0	0	0	0	0	0	0	0	0	0	0	0
GC_00001440	0	0	0	0	0	0	0	0	0	0	0	0	0	0	0	0	0	0	0	0	0	0	0	0	0	0	0	0	0	0	0	0	0	0	0	0	0	0	0	0	0	0	0	0	0	0	0	0	0
GC_00001441	1	0	0	1	1	0	1	0	0	0	1	1	0	0	0	1	0	1	0	0	0	0	0	0	0	0	0	0	1	0	0	0	0	0	1	0	0	0	0	0	0	0	0	0	0	0	0	0	0
GC_00001442	0	0	0	1	1	0	1	0	0	0	1	0	0	0	0	0	0	0	0	0	0	0	0	0	0	0	0	0	0	0	0	0	0	0	0	0	0	0	0	0	0	0	0	0	0	0	0	0	0
GC_00001443	1	0	1	0	0	1	0	0	0	0	1	1	0	0	0	0	0	1	0	0	0	0	0	0	0	0	0	0	0	0	0	0	0	0	0	0	0	0	0	0	0	0	0	0	0	0	0	0	0
GC_00001444	0	0	0	0	0	1	0	0	0	0	0	1	0	1	0	1	0	1	0	0	0	0	0	0	0	0	0	0	0	0	0	0	0	0	1	0	0	0	0	0	0	0	0	0	0	0	0	0	1
GC_00001445	0	1	0	1	0	0	1	0	0	0	1	0	0	0	0	0	0	0	0	0	0	0	0	0	0	0	0	0	0	0	0	0	0	0	0	0	0	0	0	0	0	0	0	0	0	0	0	0	0
GC_00001446	1	1	0	0	0	0	0	0	0	0	1	1	0	0	0	1	0	1	0	0	0	0	0	0	0	0	0	0	0	0	0	0	0	0	1	0	0	0	0	0	0	0	0	0	0	0	0	0	0
GC_00001447	0	1	0	1	0	0	0	0	0	0	1	0	0	0	0	1	0	0	0	0	0	0	0	0	0	0	0	0	0	0	0	0	0	0	1	0	0	0	0	0	0	0	0	0	0	0	0	0	0
GC_00001448	1	0	0	0	0	0	1	1	0	0	0	0	1	0	0	0	0	0	0	0	0	0	0	0	0	0	0	0	1	0	0	0	0	0	0	0	0	0	0	0	0	0	0	0	0	0	0	0	0
GC_00001449	1	1	1	0	0	1	0	0	0	0	1	1	0	0	0	0	0	1	0	0	0	0	0	0	0	0	0	0	0	0	0	0	0	0	0	0	0	0	0	0	0	0	0	0	0	0	0	0	0
GC_00001450	0	0	0	0	0	0	0	0	0	0	0	0	0	0	0	0	0	0	0	0	0	0	0	0	0	0	0	0	0	0	0	0	0	0	0	0	0	0	0	0	0	0	0	0	0	0	0	0	0
GC_00001451	1	0	1	0	0	1	0	0	0	0	1	1	1	0	0	0	0	1	0	0	0	0	0	0	0	0	0	0	0	0	0	0	0	1	0	0	0	0	0	0	0	0	0	0	0	0	0	0	0
GC_00001452	0	1	0	0	0	0	0	0	0	0	1	0	0	0	0	0	0	0	0	0	0	0	0	0	0	0	0	0	0	0	0	0	0	0	1	0	0	0	0	0	0	0	0	0	0	0	0	0	0
GC_00001453	1	1	0	0	1	1	0	0	0	0	0	1	0	0	0	0	0	1	0	0	0	0	0	0	0	0	0	0	0	0	0	0	0	1	0	0	0	0	0	0	0	0	0	0	0	0	0	0	0
GC_00001454	0	0	0	0	0	0	0	0	0	0	0	0	0	0	0	0	0	0	0	0	0	0	0	0	0	0	0	0	0	0	0	0	0	0	0	0	0	0	0	0	0	0	0	0	0	0	0	0	0
GC_00001455	1	1	1	0	0	1	0	0	0	0	0	1	0	0	0	0	0	1	0	0	0	0	0	0	0	0	0	0	0	0	0	0	0	1	0	0	0	0	0	0	0	0	0	0	0	0	0	0	0
GC_00001456	0	1	0	0	0	0	0	0	0	0	1	0	0	0	0	0	0	0	0	0	0	0	0	0	0	0	0	0	0	0	0	0	0	0	0	0	0	0	0	0	0	0	0	0	0	0	0	0	0
GC_00001457	0	0	0	0	0	0	0	0	0	1	0	0	0	0	0	0	0	0	0	1	0	0	1	0	0	0	0	0	0	0	0	0	0	0	0	1	1	1	1	1	1	1	1	0	0	0	0	0	0
GC_00001458	0	0	0	0	0	0	0	0	0	0	0	0	0	0	0	0	0	0	1	1	0	0	1	0	0	0	0	0	1	0	0	0	0	0	0	1	1	1	1	1	1	0	0	0	0	0	0	0	0
GC_00001459	0	0	0	0	0	0	0	0	0	0	0	0	0	0	0	0	0	0	0	0	0	0	0	0	0	0	0	0	0	0	0	0	0	0	0	0	0	0	0	0	0	0	0	0	0	0	0	0	0
GC_00001460	0	0	0	0	0	0	0	0	0	0	0	0	0	0	0	0	0	0	0	1	0	0	1	0	0	0	0	0	0	0	0	0	0	0	0	1	1	1	1	1	1	0	0	0	0	0	0	0	0
GC_00001461	0	0	0	0	0	0	0	0	0	0	0	0	0	1	1	0	1	0	0	0	0	0	0	1	0	0	0	0	0	0	0	1	0	0	0	0	0	0	0	0	0	0	0	0	1	1	1	1	1
GC_00001462	0	0	0	0	0	0	0	0	0	0	0	0	0	0	0	0	0	0	0	0	0	0	0	0	0	0	0	0	0	0	0	0	0	0	0	0	0	0	0	0	0	0	0	0	0	0	0	0	0
GC_00001463	0	0	0	0	0	0	0	0	0	1	0	0	0	0	0	0	0	0	0	1	0	0	1	0	0	0	0	0	0	0	0	0	0	0	0	1	1	1	1	1	1	1	1	0	0	0	0	0	0
GC_00001464	0	0	0	0	0	0	0	0	0	0	0	0	0	0	1	0	0	0	1	0	1	1	0	0	0	1	1	0	0	0	0	1	0	0	0	0	0	0	0	0	0	0	0	0	1	1	1	1	0
GC_00001465	0	0	0	0	0	0	0	0	0	0	0	0	0	0	0	0	0	0	0	1	0	0	1	0	0	0	0	0	0	0	0	0	0	0	0	1	1	1	1	1	1	0	0	0	0	0	0	0	0
GC_00001466	0	0	0	1	0	0	1	0	0	0	0	0	0	1	0	0	0	0	0	0	0	0	0	0	0	0	0	0	0	0	0	0	0	0	0	0	0	0	0	0	0	0	0	0	0	0	0	0	0
GC_00001467	0	0	0	0	0	0	0	0	1	0	0	0	0	0	0	0	0	0	1	0	0	1	0	1	1	1	1	1	0	1	1	0	1	0	0	0	0	0	0	0	0	0	0	1	0	0	0	0	0
GC_00001468	1	0	0	0	0	0	1	0	0	0	1	1	0	0	0	1	0	1	0	0	0	0	0	0	0	0	0	0	0	0	0	0	0	0	1	0	0	0	0	0	0	0	0	0	0	0	0	0	0
GC_00001469	0	0	0	0	0	0	0	0	0	0	0	0	0	0	0	0	0	0	0	0	0	0	0	0	0	0	0	0	0	0	0	0	0	0	0	0	0	0	0	0	0	0	0	0	0	0	0	0	0
GC_00001470	1	0	1	0	0	1	0	0	0	0	0	1	0	0	0	0	0	1	0	0	0	0	0	0	0	0	0	0	1	0	0	0	0	0	0	0	0	0	0	0	0	0	0	0	0	0	0	0	0
GC_00001471	1	1	1	0	1	1	0	0	0	0	0	1	0	0	0	0	0	1	0	0	0	0	0	0	0	0	0	0	0	0	0	0	0	1	0	0	0	0	0	0	0	0	0	0	0	0	0	0	0
GC_00001472	1	1	1	0	1	1	0	0	0	0	0	1	0	0	0	0	0	1	0	0	0	0	0	0	0	0	0	0	0	0	0	0	0	1	0	0	0	0	0	0	0	0	0	0	0	0	0	0	0
GC_00001473	0	0	0	0	0	0	0	0	0	0	0	0	0	0	0	0	0	0	0	0	0	0	0	0	0	0	0	0	0	0	0	0	0	0	1	0	0	0	0	0	0	0	0	0	0	0	0	0	0
GC_00001474	1	1	1	0	0	1	0	0	0	0	1	1	0	0	0	0	0	1	0	0	0	0	0	0	0	0	0	0	0	0	0	0	0	0	0	0	0	0	0	0	0	0	0	0	0	0	0	0	0
GC_00001475	1	1	1	0	0	1	0	0	0	0	0	1	0	0	0	0	0	1	0	0	0	0	0	0	0	0	0	0	0	0	0	0	0	1	0	0	0	0	0	0	0	0	0	0	0	0	0	0	0
GC_00001476	0	0	0	0	0	0	0	0	0	0	0	0	0	1	0	0	0	0	0	0	0	0	0	0	0	0	0	0	0	0	0	0	0	0	1	0	0	0	0	0	0	0	0	0	0	0	0	0	1
GC_00001477	1	0	1	1	0	1	0	0	0	0	1	0	0	0	0	0	0	0	0	0	0	0	0	0	0	0	0	0	0	0	0	0	0	0	1	0	0	0	0	0	0	0	0	0	0	0	0	0	0
GC_00001478	0	1	0	1	0	1	1	0	0	0	0	0	1	0	0	1	0	0	0	0	0	0	0	0	0	0	0	0	0	0	0	0	0	0	1	0	0	0	0	0	0	0	0	0	0	0	0	0	0
GC_00001479	1	0	1	0	0	1	0	0	0	0	1	0	0	0	0	1	0	0	0	0	0	0	0	0	0	0	0	0	1	0	0	0	0	1	0	0	0	0	0	0	0	0	0	0	0	0	0	0	0
GC_00001480	0	0	1	0	0	1	0	0	0	0	0	1	0	0	0	0	0	1	0	0	0	0	0	0	0	0	0	0	0	0	0	0	0	1	0	0	0	0	0	0	0	0	0	0	0	0	0	0	0
GC_00001481	0	1	0	0	0	0	0	0	0	0	0	0	0	0	0	0	0	0	0	0	0	0	0	0	0	0	0	0	0	0	0	0	0	0	0	0	0	0	0	0	0	0	0	0	0	0	0	0	0
GC_00001482	0	0	0	0	0	0	0	0	0	0	0	0	0	0	0	0	0	0	0	0	0	0	0	0	0	0	0	0	0	0	0	0	0	0	0	0	0	0	0	0	0	0	0	0	0	0	0	0	0
GC_00001483	0	0	0	0	0	0	0	0	0	0	0	0	0	0	0	0	0	0	0	0	0	0	0	0	0	0	0	0	0	0	0	0	0	0	0	0	0	0	0	0	0	0	0	0	0	0	0	0	0
GC_00001484	0	0	0	0	0	0	0	0	0	0	0	0	0	0	0	0	0	0	0	0	0	0	0	0	0	0	0	0	0	0	0	0	0	0	0	0	0	0	0	0	0	0	0	0	0	0	0	0	0
GC_00001485	0	0	0	0	0	0	0	0	0	0	0	0	0	0	0	0	0	0	0	0	0	0	0	0	0	0	0	0	0	0	0	0	0	0	0	0	0	0	0	0	0	0	0	0	0	0	0	0	0
[truncated: 5,000 more rows]
[truncated: 55 more columns]

## Sheet: Fig 5. Metabolic potential
Metabolic potential predictions and estimated completion scores from anvi'o 7
[truncated: 141 more rows]

[truncated: 2 more sheets: Sup. Fig. 2 Ribosomal Proteins, Sup. Fig. 5 accessions]
